# Supplementary material for: Abundance of Multidrug Resistance Efflux Pumps in the Urinary Metagenome of Kidney Transplant Patients
Source: Hindawi journal article supplement (doi:10.1155/2020/5421269), 2020-01-01
Supplement: f1 [file 5421269.f1.zip]

## **SUPPLEMENTARY DATA: Supplementary Figures and Tables**

### **Abundance of Multidrug Resistance Efflux Pumps in the Urinary Metagenome of Kidney Transplant Patients**

**Asha Rani<sup>1\*^</sup>, Ravi Ranjan<sup>1\*@</sup>, Ahmed A. Metwally<sup>1,2</sup>, Daniel C. Brennan<sup>3</sup>, Patricia W. Finn<sup>2,4,5#</sup>, David L. Perkins<sup>2,6,7#</sup>**

<sup>1</sup>Department of Medicine, University of Illinois at Chicago, IL 60612 USA

<sup>2</sup>Department of Bioengineering, University of Illinois at Chicago, IL 60612 USA

<sup>3</sup>Department of Medicine, Johns Hopkins School of Medicine, Baltimore, MD 21287 USA

<sup>4</sup>Division of Pulmonary, Critical Care, Sleep, and Allergy, Department of Medicine, University of Illinois at Chicago, IL 60612 USA

<sup>5</sup>Department of Microbiology and Immunology, University of Illinois at Chicago, IL 60612 USA

<sup>6</sup>Division of Nephrology, Department of Medicine, University of Illinois at Chicago, IL 60612 USA

<sup>7</sup>Department of Surgery, University of Illinois at Chicago, IL 60612 USA

\*Corresponding author:

David Perkins, MD, PhD

University of Illinois at Chicago

Department of Medicine, MC 787

840 S Wood Street, Suite 1020N CSB

Chicago IL 60612 USA

Email: [perkinsd@uic.edu](mailto:perkinsd@uic.edu)

Phone: 312-413-3382, Fax: 312-355-0499

\* Equal first author contribution, # Equal last author contribution.

^Current Address: Asha Rani, Department of Food Science, University of Massachusetts, Amherst MA 01003 USA

@Current Address: Ravi Ranjan, Genomics Resource Laboratory, Institute for Applied Life Sciences (IALS), University of Massachusetts, Amherst MA 01003 USA

#### **Running title:**

Human urinary resistome

#### **Supplementary Figures and Table Legends**

**Figure S1. ANOSIM statistics distance plots.** (a) Transplant male vs female, (b) Control male vs female, (c) Transplant group vs Control group.

**Table S1. Demographics of transplant and control subjects. Transplant samples (T1-T21) and Control samples (C1-C8) have been previously analyzed (Rani et al 2017).**

**Table S2. Sequencing statistics and accession numbers.**

**Table S3. Taxonomic and functional annotation in transplant and control groups.**

**Figure S1. ANOSIM statistics distance plots.** (a) Transplant male vs female, (b) Control male vs female, (c) Transplant group vs Control group.

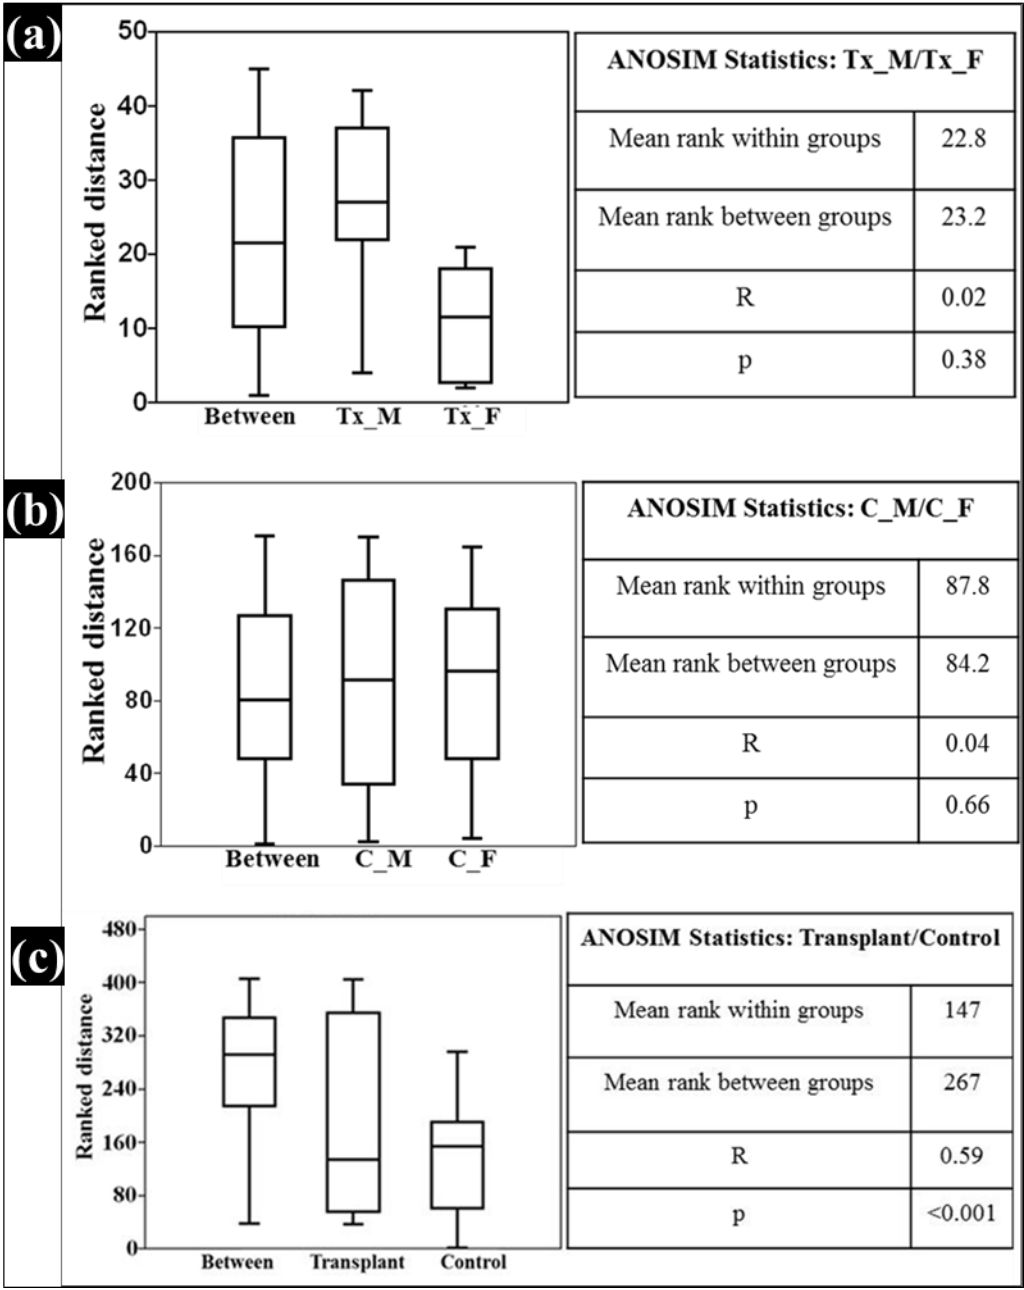

**Table S1. Demographics of transplant and control subjects. Transplant samples (T1-T21) and Control samples (C1-C8) have been previously analyzed (Rani et al 2017).**

| Sample number | Age (Years) | Gender | Ethnicity        | Clinical Diagnosis | Calcineurin Inhibitor |
|---------------|-------------|--------|------------------|--------------------|-----------------------|
| T1            | 59          | M      | Caucasian        | T1DM               | FK                    |
| T2            | 76          | M      | African American | T2DM               | FK                    |
| T3            | 31          | M      | Caucasian        | PSGN               | FK                    |
| T4            | 47          | M      | Caucasian        | PKD                | CYA                   |
| T5            | 59          | M      | Caucasian        | HTN                | FK                    |
| T6            | 65          | M      | Caucasian        | HTN                | FK                    |
| T7            | 66          | M      | Caucasian        | T2DM               | FK                    |
| T8            | 52          | M      | African American | HTN                | CYA                   |
| T9            | 62          | F      | African American | T1DM               | FK                    |
| T10           | 40          | F      | Caucasian        | Vasculitis         | CYA                   |
| T11           | 45          | F      | African American | FSGS               | CYA                   |
| T12           | 51          | M      | Caucasian        | T2DM               | FK                    |
| T13           | 41          | M      | Caucasian        | HTN                | FK                    |
| T14           | 51          | F      | Caucasian        | Lupus              | FK                    |
| T15           | 46          | F      | Caucasian        | RN                 | FK                    |
| T16           | 54          | M      | Caucasian        | HTN                | FK                    |
| T17           | 74          | F      | Caucasian        | HTN                | FK                    |
| T18           | 46          | M      | Caucasian        | HTN                | FK                    |
| T19           | 54          | M      | Caucasian        | PKD                | FK                    |
| T20           | 32          | F      | Caucasian        | T1DM               | FK                    |
| T21           | 68          | M      | Caucasian        | Nephrocalcinosis   | FK                    |
| C1            | 31          | F      | Asian            | -                  | -                     |
| C2            | 31          | F      | Caucasian        | -                  | -                     |
| C3            | 30          | F      | Caucasian        | -                  | -                     |
| C4            | 29          | M      | Asian            | -                  | -                     |
| C5            | 32          | F      | Asian            | -                  | -                     |
| C6            | 30          | M      | Caucasian        | -                  | -                     |
| C7            | 63          | M      | Caucasian        | -                  | -                     |
| C8            | 27          | F      | Caucasian        | -                  | -                     |
| C9            | 38          | M      | Caucasian        | -                  | -                     |
| C10           | 24          | M      | African American | -                  | -                     |
| C11           | 34          | M      | Caucasian        | -                  | -                     |
| C12           | 39          | F      | Caucasian        | -                  | -                     |
| C13           | 37          | F      | Caucasian        | -                  | -                     |
| C14           | 30          | M      | Caucasian        | -                  | -                     |
| C15           | 30          | M      | Caucasian        | -                  | -                     |
| C16           | 23          | F      | Caucasian        | -                  | -                     |
| C17           | 45          | M      | African American | -                  | -                     |
| C18           | 40          | M      | Caucasian        | -                  | -                     |
| C19           | 36          | F      | Caucasian        | -                  | -                     |
| C20           | 31          | M      | Caucasian        | -                  | -                     |
| C21           | 25          | M      | Caucasian        | -                  | -                     |
| C22           | 40          | M      | Caucasian        | -                  | -                     |
| C23           | 35          | M      | Caucasian        | -                  | -                     |
| C24           | 40          | F      | African American | -                  | -                     |
| C25           | 35          | F      | Caucasian        | -                  | -                     |

**Table S2. Sequencing statistics and accession numbers.**

| Sample name | No. of reads | No. of contigs | MG-RAST ID |
|-------------|--------------|----------------|------------|
| T1          | 7,849,916    | 47             | 4504962.3  |
| T2          | 21,803,762   | 2,490          | 4532153.3  |
| T3          | 10,327,248   | 25             | 4505561.3  |
| T4          | 12,785,361   | 14             | 4505562.3  |
| T5          | 7,433,295    | 374            | 4505340.3  |
| T6          | 8,174,663    | 312            | 4505341.3  |
| T7          | 34,818,382   | 7,487          | 4524189.3  |
| T8          | 27,420,614   | 4,935          | 4524191.3  |
| T9          | 31,903,768   | 2,417          | 4524193.3  |
| T10         | 28,570,804   | 6,376          | 4524195.3  |
| T11         | 35,156,390   | 5,503          | 4524197.3  |
| T12         | 642,591      | 142,377        | 4554299.3  |
| T13         | 392,172      | 17,351         | 4559944.3  |
| T14         | 281,816      | 116,106        | 4554300.3  |
| T15         | 399,222      | 103,700        | 4554302.3  |
| T16         | 580,114      | 120,382        | 4554303.3  |
| T17         | 689,472      | 179,096        | 4554304.3  |
| T18         | 881,827      | 224,869        | 4554305.3  |
| T19         | 446,857      | 131,806        | 4554306.3  |
| T20         | 563,269      | 78,559         | 4554307.3  |
| T21         | 295,740      | 72,108         | 4554308.3  |
| Total       | 231,417,283  | 1,216,334      |            |

| Sample name | MG-RAST ID | No. of reads | No. of contigs |
|-------------|------------|--------------|----------------|
| C1          | 4555679.3  | 7,545,864    | 10,732         |
| C2          | 4555680.3  | 5,384,830    | 14,516         |
| C3          | 4556080.3  | 9,235,514    | 15,563         |
| C4          | 4555681.3  | 9,790,696    | 16,247         |
| C5          | 4555682.3  | 8,187,139    | 13,343         |
| C6          | 4556081.3  | 8,043,242    | 5,387          |
| C7          | 4557780.3  | 4,690,991    | 6,946          |
| C8          | 4557851.3  | 3,756,888    | 7,507          |
| C9          | 4641627.3  | 1,510,882    | 8,346          |
| C10         | 4641628.3  | 596,298      | 3,542          |
| C11         | 4641629.3  | 1,830,274    | 9,312          |
| C12         | 4641630.3  | 1,463,490    | 3,409          |
| C13         | 4641631.3  | 1,838,588    | 9,073          |
| C14         | 4641632.3  | 1,748,344    | 11,604         |
| C15         | 4641633.3  | 602,874      | 3,566          |
| C16         | 4641634.3  | 1,757,026    | 9,525          |
| C17         | 4641635.3  | 789,210      | 4,992          |
| C18         | 4641636.3  | 2,843,574    | 16,150         |
| C19         | 4641637.3  | 1,296,320    | 5,407          |
| C20         | 4641638.3  | 1,979,906    | 11,937         |
| C21         | 4641639.3  | 2,078,520    | 6,089          |
| C22         | 4641640.3  | 1,167,598    | 4,270          |
| C23         | 4641641.3  | 807,426      | 3,053          |
| C24         | 4641642.3  | 635,262      | 3,540          |
| C25         | 4641643.3  | 1,621,126    | 8,943          |
| Total       |            | 81,201,882   | 212,999        |
