# Supplementary material for: Abundance of Multidrug Resistance Efflux Pumps in the Urinary Metagenome of Kidney Transplant Patients
Source: Biomed Res Int. 2020 Mar 12;2020:5421269. doi: 10.1155/2020/5421269 (PMC7093903; doi:10.1155/2020/5421269)
Supplement: Supplementary Materials — Figure S1: ANOSIM statistics distance plots. (a) Transplant male vs. female, (b) control male vs. female, (c) transplant group vs. control group. Table S1: demographics of transplant and control subjects. Transplant samples (T1–T21) and control samples (C1–C8) have been previously analyzed [5]. Table S2: sequencing statistics and accession numbers. Table S3: taxonomic and functional annotation in transplant and control groups. [file 5421269.f1.zip]

Archive with 2 entries (2 files):
- 5421269.f1/ARG_0804_Supplementary-Data_0217.pdf
- 5421269.f1/Table S3.xlsx
