# Supplementary material for: Abundance of Multidrug Resistance Efflux Pumps in the Urinary Metagenome of Kidney Transplant Patients
Source: Biomed Res Int. 2020 Mar 12;2020:5421269. doi: 10.1155/2020/5421269 (PMC7093903; doi:10.1155/2020/5421269)
Supplement: Supplementary Materials — Figure S1: ANOSIM statistics distance plots. (a) Transplant male vs. female, (b) control male vs. female, (c) transplant group vs. control group. Table S1: demographics of transplant and control subjects. Transplant samples (T1–T21) and control samples (C1–C8) have been previously analyzed [5]. Table S2: sequencing statistics and accession numbers. Table S3: taxonomic and functional annotation in transplant and control groups. [file 5421269.f1.zip › 5421269.f1/Table S3.xlsx]

## Sheet: Genus
phylum	class	order	family	genus	Group T: mean rel. freq. (%)	Group C: mean rel. freq. (%)	p-values	p-values (corrected)	T1	T2	T3	T4	T5	T6	T7	T8	T9	T10	T11	T12	T13	T14	T15	T16	T17	T18	T19	T20	T21	C1	C2	C3	C4	C5	C6	C7	C8	C9	C10	C11	C12	C13	C14	C15	C16	C17	C18	C19	C20
Proteobacteria	Gammaproteobacteria	Enterobacteriales	Enterobacteriaceae	Escherichia	12.6747	0.720293	1.05039e-05	0.00660698	8.82353	21.6964	15.7895	0	0.190788	0.140213	21.9788	19.1611	27.4154	14.607	16.317	3.83632	5.95238	30.417	18.3267	18.3521	0.470773	15.3846	0.197418	15.8129	11.2994	1.33306	0.514016	0.782096	0.61786	1.10793	4.88909	0.738363	1.13464	0.070028	0	0.293327	0	0.109012	0.349524	0.125945	0.0497018	1.86567	0.350418	0.363196	0.195647
Proteobacteria	Betaproteobacteria	Burkholderiales	Comamonadaceae	Alicycliphilus	0.00144629	0.0761597	0.000260158	0.0818196	0	0	0	0	0	0	0	0	0	0	0	0	0	0	0	0	0	0	0.0303721	0	0	0.0104145	0.0298846	0.0360967	0.0349732	0.0852251	0	0	0	0.087535	0.102041	0.12222	0	0.181686	0.144631	0.125945	0	0.373134	0.0575314	0	0.146735
Proteobacteria	Gammaproteobacteria	Enterobacteriales	Enterobacteriaceae	Shigella	7.42929	0.0868409	0.000335064	0.0702517	2.94118	16.1323	21.0526	0	0.163532	0.0280426	15.8968	15.2419	21.0593	10.1162	10.9342	0.255754	0.297619	18.087	11.1554	5.99251	0.0784621	0.699301	0.0759301	4.67706	1.12994	0.187461	0.107585	0.0601612	0.0932618	0.116216	0.497963	0.0321027	0.151286	0	0	0	0	0.0363372	0.132578	0	0.0124254	0	0.0993724	0.121065	0.0244559
Proteobacteria	Betaproteobacteria	Burkholderiales	Comamonadaceae	Acidovorax	0.10062	0.383191	0.000337393	0.053055	0	0.0169635	0	0	0	0	0.00564717	0	0	0	0.0134907	0	0.297619	0	0	0	0.706159	0	0.850418	0.222717	0	0.156217	0.382523	0.192516	0.442994	0.488107	0.316885	0.0642055	0.226929	0.603992	0.170068	0.635541	0.389105	0.508721	0.759311	0.881612	0.149105	0.373134	0.355649	0	0.464661
Actinobacteria	Actinobacteria (class)	Actinomycetales	Micrococcaceae	Arthrobacter	0.00711728	0.243582	0.00148409	0.186698	0	0	0	0	0	0	0.067766	0.0183711	0	0.0481397	0	0	0	0	0	0	0	0	0.015186	0	0	0.781087	0.364593	0.625677	0.990907	0.123964	0.181077	0.834671	0.983359	0.0437675	0.0680272	0.0488878	0	0.0726744	0.0241051	0.125945	0.0248509	0	0.0889121	0	0.0733676
Actinobacteria	Actinobacteria (class)	Actinomycetales	Nocardiaceae	Rhodococcus	0.00634763	0.158141	0.0015739	0.164998	0	0.00848176	0	0	0	0	0.00564717	0.0061237	0	0	0.00674536	0	0	0	0	0	0	0	0.106302	0	0	0.499896	0.298846	0.565516	0.51294	0.0852251	0.135808	0.577849	0	0	0.0340136	0	0	0	0.0120525	0	0	0.373134	0	0	0
Actinobacteria	Actinobacteria (class)	Actinomycetales	Actinomycetaceae	Mobiluncus	0.0411629	1.08575	0.00179531	0.161321	0	0.0169635	0	0	0	0.0280426	0.0169415	0	0.00796495	0.0137542	0.0134907	0.767263	0	0	0	0	0	0	0	0	0	1.95793	1.37469	3.09229	3.85871	0.0774773	0.316885	5.10433	3.70651	0	0.37415	0.268883	1.94553	0.181686	0	0.503778	0.236083	2.61194	0.303347	0	0.855955
Bacteroidetes	Bacteroidia	Bacteroidales	Prevotellaceae	Prevotella	0.0420971	1.39517	0.00193365	0.152033	0	0.00848176	0	0	0	0	0.033883	0.0244948	0.00796495	0.0412626	0.0337268	0.511509	0	0	0	0	0	0	0	0.222717	0	0.62487	0.44827	3.24871	3.15924	0.178198	0.769579	7.76886	5.03026	0.0962885	0.238095	0.195551	0.389105	0.25436	0.0843678	0.503778	0.124254	3.73134	2.91841	1.81598	2.20103
Proteobacteria	Alphaproteobacteria	Rhizobiales	Bradyrhizobiaceae	Rhodopseudomonas	0.00407848	0.0481695	0.00193726	0.135393	0	0.0169635	0	0	0	0	0.033883	0	0	0	0	0	0	0	0	0	0.0196155	0	0.015186	0	0	0.0729015	0.131492	0.0360967	0.10492	0.193693	0.0452694	0.0321027	0	0	0	0	0	0.0726744	0	0	0	0	0	0	0.0244559
Actinobacteria	Actinobacteria (class)	Actinomycetales	Dermacoccaceae	Kytococcus	0	0.0783685	0.00464526	0.292187	0	0	0	0	0	0	0	0	0	0	0	0	0	0	0	0	0	0	0	0	0	0.187461	0.0717231	0.204548	0.244812	0.0697296	0.181077	0.0963082	0.226929	0.0087535	0.102041	0	0	0	0	0	0	0	0	0	0
Proteobacteria	Betaproteobacteria	Burkholderiales	Comamonadaceae	Delftia	0.0200032	0.0997852	0.00494755	0.28291	0	0	0	0	0	0	0	0	0	0.00687711	0	0	0	0	0	0	0.215771	0	0.197418	0	0	0.124974	0.101608	0.048129	0.116577	0.24018	0.226347	0	0	0.017507	0.170068	0.293327	0	0.0363372	0.0241051	0.125945	0.0124254	0	0.0209205	0	0.0489117
Actinobacteria	Actinobacteria (class)	Actinomycetales	Micromonosporaceae	Micromonospora	0.000291605	0.0243576	0.00520015	0.272575	0	0	0	0	0	0	0	0.0061237	0	0	0	0	0	0	0	0	0	0	0	0	0	0.0937305	0.0298846	0.096258	0.139893	0.0232432	0	0.0642055	0.075643	0.017507	0	0	0	0	0	0	0	0	0.0313808	0	0
Actinobacteria	Actinobacteria (class)	Actinomycetales	Corynebacteriaceae	Corynebacterium	0.31937	3.77598	0.00602483	0.291509	0	0	0	0	0	0	0.158121	0.140845	0.0159299	0.103157	0.00674536	1.53453	0	0	1.19522	1.1236	0.0196155	1.3986	0	0.445434	0.564972	15.653	8.80402	13.1031	18.3376	2.7427	2.12766	12.809	10.8169	0.052521	0.136054	0.0244439	0.77821	0.218023	0.361576	0.125945	0.124254	0.373134	1.01987	0.363196	0.489117
Proteobacteria	Betaproteobacteria	Burkholderiales	Burkholderiaceae	Ralstonia	9.55565	33.1805	0.00620841	0.278935	5.88235	0	0	0	0.436086	0.364554	0.00564717	0.0122474	0	0.00687711	0.0134907	27.11	6.54762	0.0453309	0	0.749064	75.3629	5.59441	75.6264	1.78174	1.12994	3.18684	32.9389	2.85164	2.89112	16.4872	0.271616	0.417335	1.62632	84.8739	82.2789	76.5094	35.0195	75.218	76.6422	71.7884	22.2043	9.32836	35.7374	4.23729	64.3434
Actinobacteria	Actinobacteria (class)	Actinomycetales	Micrococcaceae	Renibacterium	0	0.0248703	0.0062422	0.261756	0	0	0	0	0	0	0	0	0	0	0	0	0	0	0	0	0	0	0	0	0	0.114559	0.0478154	0.0842257	0.10492	0.00774773	0.0905387	0.0963082	0.075643	0	0	0	0	0	0	0	0	0	0	0	0
Firmicutes	Bacilli	Lactobacillales	Enterococcaceae	Enterococcus	28.6231	7.15377	0.00626414	0.246259	64.7059	45.3605	36.8421	90	85.5819	81.576	35.5828	37.2137	34.9343	17.2822	42.8061	3.06905	5.65476	0.181324	0.398406	7.1161	0.0980777	3.4965	0.0911162	4.00891	5.08475	1.33306	0.818839	1.492	1.20075	1.28612	6.60933	2.05457	2.60968	0.420168	0.272109	1.63774	8.56031	1.2718	2.1333	4.53401	55.3429	10.8209	1.86192	51.937	2.34776
Proteobacteria	Gammaproteobacteria	Pasteurellales	Pasteurellaceae	Mannheimia	0	0.0837153	0.00646455	0.239188	0	0	0	0	0	0	0	0	0	0	0	0	0	0	0	0	0	0	0	0	0	0.124974	0.0717231	0.10829	0.0932618	0.209189	0.407424	0.0321027	0.113464	0.017507	0.0340136	0	0	0.0363372	0	0	0	0	0.0156904	0	0
Actinobacteria	Actinobacteria (class)	Actinomycetales	Jonesiaceae	Jonesia	0	0.0404789	0.00652832	0.228128	0	0	0	0	0	0	0	0	0	0	0	0	0	0	0	0	0	0	0	0	0	0.156217	0.0896539	0.120322	0.198181	0.00774773	0	0.192616	0.151286	0.0087535	0	0	0	0	0.0723153	0	0	0	0	0	0
Proteobacteria	Betaproteobacteria	Burkholderiales	Comamonadaceae	Curvibacter	0.00144629	0.0318939	0.00699536	0.231583	0	0	0	0	0	0	0	0	0	0	0	0	0	0	0	0	0	0	0.0303721	0	0	0.020829	0.0358616	0	0.0349732	0.0154955	0.0452694	0	0	0.0262605	0	0.0488878	0	0.0363372	0.0482102	0.251889	0.0124254	0	0.0209205	0	0.0244559
Actinobacteria	Actinobacteria (class)	Actinomycetales	Nocardiaceae	Nocardia	0.00219563	0.0688673	0.00701125	0.220504	0	0	0	0	0	0	0	0	0	0.00687711	0	0	0	0	0	0	0.0392311	0	0	0	0	0.249948	0.161377	0.192516	0.431336	0.0619819	0.181077	0.128411	0.226929	0	0	0	0	0	0	0	0	0	0	0	0
Proteobacteria	Alphaproteobacteria	Rhizobiales	Brucellaceae	Ochrobactrum	0.000807787	0.0144856	0.00703035	0.210576	0	0.0169635	0	0	0	0	0	0	0	0	0	0	0	0	0	0	0	0	0	0	0	0.062487	0.0119539	0.0360967	0.0116577	0.0309909	0.0452694	0	0	0.0087535	0	0.0488878	0	0	0.0120525	0	0.0124254	0	0	0	0
Proteobacteria	Deltaproteobacteria	Desulfuromonadales	Pelobacteraceae	Pelobacter	0.000917109	0.0169417	0.00746327	0.213382	0	0	0	0	0	0	0.0112943	0	0.00796495	0	0	0	0	0	0	0	0	0	0	0	0	0.041658	0.00597693	0.0120322	0	0.0232432	0.0452694	0.0321027	0.113464	0	0	0.0488878	0	0	0	0	0	0	0.0209205	0	0
Proteobacteria	Gammaproteobacteria	Xanthomonadales	Xanthomonadaceae	Stenotrophomonas	0.00359934	0.0409532	0.00794226	0.217204	0	0	0	0	0	0	0	0	0.00796495	0.00687711	0	0	0	0	0	0	0	0	0.0607441	0	0	0.135388	0.113562	0.096258	0.221497	0.0852251	0.135808	0.0963082	0	0	0	0.0244439	0	0	0	0	0	0	0	0	0
Actinobacteria	Actinobacteria (class)	Actinomycetales	Geodermatophilaceae	Geodermatophilus	0.000619086	0.0566155	0.00864026	0.226447	0	0	0	0	0	0	0	0.0061237	0	0.00687711	0	0	0	0	0	0	0	0	0	0	0	0.104145	0.0478154	0.0842257	0.163208	0.0697296	0.316885	0.128411	0.075643	0	0	0	0	0	0	0	0.0621272	0	0	0.363196	0
Actinobacteria	Actinobacteria (class)	Actinomycetales	Gordoniaceae	Gordonia	0.000268913	0.0554289	0.00896098	0.225458	0	0	0	0	0	0	0.00564717	0	0	0	0	0	0	0	0	0	0	0	0	0	0	0.062487	0.0956309	0.180484	0.221497	0.0232432	0	0.0963082	0.226929	0	0	0.0244439	0	0	0	0	0	0.373134	0	0	0
Actinobacteria	Actinobacteria (class)	Actinomycetales	Acidothermaceae	Acidothermus	0	0.0226015	0.00943246	0.228193	0	0	0	0	0	0	0	0	0	0	0	0	0	0	0	0	0	0	0	0	0	0.0312435	0.0358616	0.120322	0.0932618	0.00774773	0	0.128411	0.075643	0	0	0	0	0	0	0	0	0	0	0	0
Proteobacteria	Gammaproteobacteria	Pasteurellales	Pasteurellaceae	Aggregatibacter	0.0061204	0.0515231	0.00985393	0.22956	0	0	0	0	0	0.0841279	0.0112943	0	0	0	0.0134907	0	0	0	0	0	0.0196155	0	0	0	0	0.083316	0.0478154	0.120322	0.0699464	0.162702	0.316885	0	0.0378215	0	0.0340136	0	0	0	0.0361576	0	0	0	0.0156904	0	0
Proteobacteria	Alphaproteobacteria	Sphingomonadales	Sphingomonadaceae	Sphingomonas	0.000723144	0.0541935	0.0101504	0.228021	0	0	0	0	0	0	0	0	0	0	0	0	0	0	0	0	0	0	0.015186	0	0	0.0729015	0.0478154	0.156419	0.419678	0.0619819	0.0905387	0.0321027	0.075643	0.0087535	0	0	0	0	0	0	0	0	0.0104603	0	0.0489117
Proteobacteria	Alphaproteobacteria	Rhizobiales	Rhizobiaceae	Sinorhizobium	0.00351458	0.0528066	0.0107041	0.232168	0	0	0	0	0	0	0.0169415	0	0	0.00687711	0	0	0	0	0	0	0.0196155	0	0.0303721	0	0	0.197875	0.0657462	0.0601612	0.0816041	0.131711	0.0452694	0	0	0	0	0	0	0.0363372	0.0241051	0	0	0.373134	0.00523013	0	0
Actinobacteria	Actinobacteria (class)	Actinomycetales	Beutenbergiaceae	Beutenbergia	0	0.0269307	0.0116322	0.243889	0	0	0	0	0	0	0	0	0	0	0	0	0	0	0	0	0	0	0	0	0	0.124974	0.0777001	0.10829	0.186524	0.0387387	0	0.0642055	0.0378215	0.035014	0	0	0	0	0	0	0	0	0	0	0
Actinobacteria	Actinobacteria (class)	Coriobacteriales	Coriobacteriaceae	Collinsella	0.000268913	0.00763611	0.0119215	0.241892	0	0	0	0	0	0	0.00564717	0	0	0	0	0	0	0	0	0	0	0	0	0	0	0.020829	0.0239077	0.0120322	0.0233155	0	0	0.0321027	0.0378215	0	0	0	0	0	0	0	0	0	0	0	0
Actinobacteria	Actinobacteria (class)	Actinomycetales	Pseudonocardiaceae	Amycolatopsis	0	0.0121516	0.0125457	0.246602	0	0	0	0	0	0	0	0	0	0	0	0	0	0	0	0	0	0	0	0	0	0.0520725	0.0179308	0	0.0466309	0.0154955	0	0.0321027	0.0378215	0	0	0	0	0	0	0	0	0	0	0	0
Firmicutes	Bacilli	Bacillales	Staphylococcaceae	Staphylococcus	1.1746	0.193632	0.0125979	0.240123	5.88235	0.390161	0	0	0.626874	1.87886	0.502598	0.771586	0.987654	1.91871	0.310287	5.11509	2.67857	0	1.19522	1.49813	0.0196155	0	0	0.890869	0	0.218704	0.0777001	0.312838	0.291443	0.108468	0.316885	0.321027	0.226929	0	0	0	0	0.0363372	0.0120525	0.125945	0.360338	1.1194	0.0679916	0.726392	0.0733676
Actinobacteria	Actinobacteria (class)	Actinomycetales	Microbacteriaceae	Leifsonia	0.000268913	0.0261439	0.0127471	0.235822	0	0	0	0	0	0	0.00564717	0	0	0	0	0	0	0	0	0	0	0	0	0	0	0.145803	0.0717231	0.0601612	0.163208	0.0232432	0	0.0963082	0.075643	0.017507	0	0	0	0	0	0	0	0	0	0	0
Actinobacteria	Actinobacteria (class)	Actinomycetales	Nakamurellaceae	Nakamurella	0.00119279	0.0609989	0.0128213	0.230417	0	0	0	0	0	0	0.0112943	0	0	0.0137542	0	0	0	0	0	0	0	0	0	0	0	0.156217	0.0597693	0.132355	0.221497	0.0387387	0	0.224719	0.302572	0	0	0	0.389105	0	0	0	0	0	0	0	0
Actinobacteria	Actinobacteria (class)	Actinomycetales	Nocardiopsaceae	Thermobifida	0	0.0294656	0.0132689	0.231837	0	0	0	0	0	0	0	0	0	0	0	0	0	0	0	0	0	0	0	0	0	0.166632	0.0537924	0.10829	0.198181	0	0	0.0642055	0.0378215	0	0	0	0	0	0	0	0	0	0.0261506	0	0
Proteobacteria	Betaproteobacteria	Neisseriales	Neisseriaceae	Laribacter	0.00273482	0.024604	0.0138318	0.235141	0	0.00848176	0	0	0	0	0.0225887	0	0	0	0.00674536	0	0	0	0	0	0.0196155	0	0	0	0	0.062487	0.0537924	0.0842257	0.0116577	0.0852251	0.135808	0.0321027	0.113464	0	0	0	0	0.0363372	0	0	0	0	0	0	0
Bacteroidetes	Bacteroidia	Bacteroidales	Rikenellaceae	Alistipes	0.00262939	0.0256546	0.0138661	0.22952	0	0	0	0	0	0	0.0282358	0	0	0	0.0269815	0	0	0	0	0	0	0	0	0	0	0.041658	0.0239077	0.0721935	0.0466309	0.0542341	0.0452694	0.192616	0.075643	0	0.0340136	0	0	0.0363372	0	0	0	0	0.00523013	0	0
Proteobacteria	Betaproteobacteria	Neisseriales	Neisseriaceae	Eikenella	0.0584943	0.312692	0.0143465	0.231383	0	0	0	0	0	0	0.033883	0	0	0	0	0	0	0	0	0.749064	0	0	0	0.445434	0	0.218704	0.119539	0.240645	0.174866	0.402882	0.67904	0.160514	0.226929	0	0	0.171107	0.389105	0	0	0	0.0372763	0.746269	0.245816	0.484262	0.317926
Proteobacteria	Zetaproteobacteria	Mariprofundales	Mariprofundaceae	Mariprofundus	0	0.00572566	0.014442	0.2271	0	0	0	0	0	0	0	0	0	0	0	0	0	0	0	0	0	0	0	0	0	0	0.00597693	0.0240645	0.0116577	0.0154955	0	0.0321027	0	0.017507	0	0	0	0.0363372	0	0	0	0	0	0	0
Proteobacteria	Betaproteobacteria	Neisseriales	Neisseriaceae	Neisseria	2.21546	7.13704	0.014529	0.222896	0	0.0254453	5.26316	0	0	0.0560852	3.94172	0.0122474	0.00796495	0.0343855	0.0134907	2.30179	13.0952	0.0906618	1.99203	0.749064	0.137309	4.1958	0.136674	7.12695	7.34463	8.08165	3.20363	5.41451	4.42994	8.59998	18.651	3.69181	6.05144	1.03291	1.70068	1.07553	4.66926	2.39826	5.14644	1.1335	0.919483	10.0746	3.87552	4.84262	2.29885
Proteobacteria	Betaproteobacteria	Methylophilales	Methylophilaceae	Methylobacillus	0.00414019	0.0276952	0.0149077	0.223261	0	0.00848176	0	0	0	0	0	0	0	0	0	0	0	0	0	0	0.0784621	0	0	0	0	0.0104145	0.0418385	0.0360967	0.15155	0.108468	0	0	0.0378215	0	0	0	0	0	0.0723153	0	0	0	0.0732218	0	0
Actinobacteria	Actinobacteria (class)	Actinomycetales	Intrasporangiaceae	Intrasporangium	0	0.0191005	0.0154653	0.226225	0	0	0	0	0	0	0	0	0	0	0	0	0	0	0	0	0	0	0	0	0	0.0104145	0.0239077	0.048129	0.116577	0.00774773	0	0.0963082	0.113464	0	0	0	0	0	0.0120525	0	0	0	0	0	0.0489117
Actinobacteria	Actinobacteria (class)	Actinomycetales	Intrasporangiaceae	Janibacter	0.00120299	0.0330037	0.0159416	0.227893	0	0	0	0	0	0	0.00564717	0	0	0	0	0	0	0	0	0	0.0196155	0	0	0	0	0.083316	0.0298846	0.0842257	0.174866	0	0	0.128411	0.226929	0	0	0.0244439	0	0	0.0241051	0	0	0	0	0	0.0489117
Actinobacteria	Actinobacteria (class)	Actinomycetales	Actinomycetaceae	Arcanobacterium	0.00321775	0.0685926	0.0165113	0.230791	0	0	0	0	0	0.0280426	0.0395302	0	0	0	0	0	0	0	0	0	0	0	0	0	0	0.145803	0.143446	0.204548	0.384705	0.00774773	0.0452694	0.385233	0.340393	0	0	0	0	0	0	0	0	0	0	0	0
Proteobacteria	Gammaproteobacteria	Vibrionales	Vibrionaceae	Aliivibrio	0.00619218	0.0355919	0.0169014	0.231109	0	0	0	0	0	0	0.00564717	0	0	0	0.0337268	0	0	0.0906618	0	0	0	0	0	0	0	0	0.0239077	0.0240645	0	0.0232432	0.0905387	0	0	0.035014	0.0340136	0.0244439	0	0.0363372	0.0361576	0.251889	0.0124254	0	0.0470711	0	0.0978234
Proteobacteria	Alphaproteobacteria	Rhodobacterales	Rhodobacteraceae	Roseovarius	0	0.0221968	0.0180239	0.241213	0	0	0	0	0	0	0	0	0	0	0	0	0	0	0	0	0	0	0	0	0	0.166632	0.0119539	0	0.0116577	0.0232432	0.0452694	0	0	0	0	0.0244439	0	0	0	0.125945	0	0	0	0	0
Actinobacteria	Actinobacteria (class)	Actinomycetales	Promicromonosporaceae	Xylanimonas	0.000321208	0.0274458	0.0181948	0.238428	0	0	0	0	0	0	0	0	0	0	0.00674536	0	0	0	0	0	0	0	0	0	0	0.0937305	0.0358616	0.156419	0.174866	0.0154955	0	0.0963082	0.113464	0	0	0	0	0	0	0	0	0	0	0	0
Actinobacteria	Actinobacteria (class)	Actinomycetales	Catenulisporaceae	Catenulispora	0.000806738	0.0220675	0.0185208	0.237746	0	0	0	0	0	0	0.0169415	0	0	0	0	0	0	0	0	0	0	0	0	0	0	0.0729015	0.0239077	0.0721935	0.139893	0.0387387	0	0.128411	0.075643	0	0	0	0	0	0	0	0	0	0	0	0
Firmicutes	Clostridia	Clostridiales	Lachnospiraceae	Dorea	0	0.00471272	0.0188622	0.237287	0	0	0	0	0	0	0	0	0	0	0	0	0	0	0	0	0	0	0	0	0	0.0104145	0	0.0240645	0.0233155	0.0154955	0	0.0321027	0	0	0	0	0	0	0	0	0.0124254	0	0	0	0
Actinobacteria	Actinobacteria (class)	Actinomycetales	Pseudonocardiaceae	Saccharomonospora	0	0.0163262	0.0191049	0.235627	0	0	0	0	0	0	0	0	0	0	0	0	0	0	0	0	0	0	0	0	0	0.041658	0.0358616	0.0721935	0.0932618	0.0464864	0	0	0.113464	0	0	0	0	0	0	0	0	0	0.00523013	0	0
Planctomycetes	Planctomycetia	Planctomycetales	Planctomycetaceae	Gemmata	0.000268913	0.0137403	0.0191895	0.23212	0	0	0	0	0	0	0.00564717	0	0	0	0	0	0	0	0	0	0	0	0	0	0	0.020829	0	0	0.0233155	0.0929728	0	0	0	0.0262605	0	0	0	0	0	0	0	0	0	0	0
Actinobacteria	Actinobacteria (class)	Actinomycetales	Pseudonocardiaceae	Actinosynnema	0	0.019461	0.0195407	0.231907	0	0	0	0	0	0	0	0	0	0	0	0	0	0	0	0	0	0	0	0	0	0.062487	0.0418385	0.096258	0.163208	0.00774773	0.0452694	0	0.0378215	0	0	0	0	0	0	0	0	0	0	0	0.0244559
Actinobacteria	Actinobacteria (class)	Actinomycetales	Sanguibacteraceae	Sanguibacter	0.000806738	0.0241799	0.0197053	0.229531	0	0	0	0	0	0	0.0169415	0	0	0	0	0	0	0	0	0	0	0	0	0	0	0.083316	0.0478154	0.0721935	0.15155	0.00774773	0	0.128411	0.113464	0	0	0	0	0	0	0	0	0	0	0	0
Proteobacteria	Gammaproteobacteria	Vibrionales	Vibrionaceae	Photobacterium	0.0108887	0.0985636	0.020209	0.231118	0	0	0	0	0	0	0.00564717	0	0.00796495	0	0.0337268	0	0	0.181324	0	0	0	0	0	0	0	0.114559	0.0717231	0.0721935	0.0349732	0.201441	0.135808	0	0.0378215	0.017507	0	0	0	0	0.0482102	0.125945	0.0372763	0.373134	0	0	0.0244559
Proteobacteria	Gammaproteobacteria	Vibrionales	Vibrionaceae	unclassified (derived from Vibrionaceae)	0.000596394	0.153036	0.021174	0.237829	0	0	0	0	0	0	0.00564717	0	0	0.00687711	0	0	0	0	0	0	0	0	0	0	0	0.020829	0.0239077	0.0601612	0.0116577	0.0542341	0	0	0	0.035014	0	0	0	0	0.156683	0	0.0248509	1.1194	0	0	0.146735
Proteobacteria	Gammaproteobacteria	Enterobacteriales	Enterobacteriaceae	Salmonella	1.63974	0.379825	0.021264	0.23465	0	0.398643	0	0	0.0272554	0.11217	0.480009	0.361298	0.565512	0.453889	2.75211	1.53453	0.595238	2.31188	2.39044	5.24345	0.17654	4.8951	0.0607441	8.68597	3.38983	0.645699	0.239077	0.397064	0.384705	0.635314	2.12766	0.481541	0.567322	0.0612745	0.0680272	0.0244439	0	0.145349	0.120525	0	0.0497018	1.1194	0.141213	0.363196	0.342382
Firmicutes	Bacilli	Bacillales	Listeriaceae	Listeria	0.308843	0.106289	0.0222723	0.241539	0	0.551315	0	0	1.00845	1.14975	0.570364	0.312309	0.406213	0.323224	0.418212	0.255754	0.892857	0	0	0.374532	0	0	0	0.222717	0	0.166632	0.0537924	0.132355	0.174866	0.131711	0.633771	0.256822	0.226929	0.0087535	0	0	0	0	0.0482102	0	0.260934	0	0.0523013	0	0.0489117
Spirochaetes	Spirochaetia	Spirochaetales	Spirochaetaceae	Treponema	0.000583209	0.0261952	0.0225306	0.240199	0	0	0	0	0	0	0	0.0122474	0	0	0	0	0	0	0	0	0	0	0	0	0	0.062487	0.0119539	0.144387	0.0932618	0.0309909	0	0.160514	0.151286	0	0	0	0	0	0	0	0	0	0	0	0
Proteobacteria	Alphaproteobacteria	Rhizobiales	Methylobacteriaceae	Methylobacterium	0.0138793	0.108349	0.0236089	0.2475	0	0	0	0	0	0	0.0112943	0.0061237	0.0159299	0.0206313	0.0134907	0	0	0	0	0	0.117693	0	0.106302	0	0	0.270777	0.0657462	0.132355	0.10492	0.100721	0	0	0	0.0087535	0	0	0	0.0363372	0	0	0.0124254	0	0.303347	0	0
Proteobacteria	Deltaproteobacteria	Myxococcales	Kofleriaceae	Haliangium	0	0.00891056	0.0239086	0.246533	0	0	0	0	0	0	0	0	0	0	0	0	0	0	0	0	0	0	0	0	0	0.020829	0	0.0360967	0.0349732	0.0542341	0	0.0642055	0	0	0	0	0	0	0	0	0.0124254	0	0	0	0
Proteobacteria	Gammaproteobacteria	Chromatiales	Chromatiaceae	Nitrosococcus	0.00194882	0.0134546	0.024969	0.253314	0	0	0	0	0	0	0	0.0061237	0	0	0	0	0	0	0	0	0.0196155	0	0.015186	0	0	0.0104145	0.0179308	0.048129	0.0466309	0.0852251	0.0452694	0	0	0	0	0	0	0	0	0	0.0124254	0	0.00523013	0	0
Actinobacteria	Actinobacteria (class)	Actinomycetales	Dietziaceae	Dietzia	0	0.0155441	0.0259457	0.259045	0	0	0	0	0	0	0	0	0	0	0	0	0	0	0	0	0	0	0	0	0	0.0729015	0.0119539	0.0842257	0.116577	0.0387387	0	0.0642055	0	0	0	0	0	0	0	0	0	0	0	0	0
Proteobacteria	Alphaproteobacteria	Rhodobacterales	Rhodobacteraceae	Paracoccus	0.000934073	0.0234124	0.0261121	0.256633	0	0	0	0	0	0	0	0	0	0	0	0	0	0	0	0	0.0196155	0	0	0	0	0.187461	0.0119539	0.048129	0.0582886	0.0542341	0.0905387	0	0	0	0	0	0	0	0	0	0.0124254	0	0	0	0.122279
Proteobacteria	Betaproteobacteria	Rhodocyclales	Rhodocyclaceae	Aromatoleum	0.00238036	0.0224445	0.0262477	0.253997	0	0	0	0	0	0	0	0	0	0	0	0	0	0	0	0	0.0196155	0	0.0303721	0	0	0.0520725	0.0298846	0.0360967	0.0466309	0.116216	0	0.0321027	0.0378215	0	0	0	0	0	0	0	0.0372763	0	0	0	0
Proteobacteria	Betaproteobacteria	Burkholderiales	Oxalobacteraceae	Oxalobacter	0.000934073	0.0107751	0.0262761	0.25042	0	0	0	0	0	0	0	0	0	0	0	0	0	0	0	0	0.0196155	0	0	0	0	0.0104145	0.00597693	0.0120322	0.0466309	0.0309909	0.0452694	0	0	0	0	0.0244439	0	0	0.0120525	0	0	0	0	0	0
Actinobacteria	Actinobacteria (class)	Actinomycetales	Streptosporangiaceae	Streptosporangium	0.00249345	0.0181887	0.0267922	0.251527	0	0	0	0	0	0	0	0.0122474	0	0.0137542	0.00674536	0	0	0	0	0	0.0196155	0	0	0	0	0.062487	0.0239077	0.0601612	0.0816041	0	0	0.0642055	0.113464	0	0	0.0488878	0	0	0	0	0	0	0	0	0
Proteobacteria	Alphaproteobacteria	Sphingomonadales	Sphingomonadaceae	Sphingopyxis	0.00270784	0.0463801	0.0268769	0.248611	0	0	0	0	0	0	0	0	0	0.00687711	0	0	0	0	0	0	0.0196155	0	0.0303721	0	0	0.020829	0.0179308	0.0240645	0.116577	0.100721	0	0	0.0378215	0	0	0.0488878	0.389105	0.0363372	0	0.251889	0	0	0	0	0
Actinobacteria	Actinobacteria (class)	Actinomycetales	Nocardiopsaceae	Nocardiopsis	0	0.0184644	0.0271536	0.247531	0	0	0	0	0	0	0	0	0	0	0	0	0	0	0	0	0	0	0	0	0	0.083316	0.0239077	0.0601612	0.0466309	0	0	0.0963082	0.151286	0	0	0	0	0	0	0	0	0	0	0	0
Chrysiogenetes	Chrysiogenetes (class)	Chrysiogenales	Chrysiogenaceae	Desulfurispirillum	0.000537825	0.00587306	0.027963	0.251268	0	0	0	0	0	0	0.0112943	0	0	0	0	0	0	0	0	0	0	0	0	0	0	0.020829	0	0.0120322	0.0233155	0.0154955	0	0.0321027	0.0378215	0	0	0	0	0	0	0	0	0	0.00523013	0	0
Verrucomicrobia	unclassified (derived from Verrucomicrobia)	unclassified (derived from Verrucomicrobia)	unclassified (derived from Verrucomicrobia)	unclassified (derived from Verrucomicrobia)	0.00202199	0	0.0290987	0.25779	0	0.00848176	0	0	0	0	0.00564717	0	0.00796495	0.00687711	0.0134907	0	0	0	0	0	0	0	0	0	0	0	0	0	0	0	0	0	0	0	0	0	0	0	0	0	0	0	0	0	0
Proteobacteria	Gammaproteobacteria	Acidithiobacillales	Acidithiobacillaceae	Acidithiobacillus	0	0.0106241	0.0294369	0.257164	0	0	0	0	0	0	0	0	0	0	0	0	0	0	0	0	0	0	0	0	0	0	0.00597693	0	0.0233155	0.0387387	0	0.0642055	0.0378215	0	0	0	0	0	0	0	0	0	0	0	0
Proteobacteria	Alphaproteobacteria	Rhizobiales	Rhizobiaceae	Agrobacterium	0.00809101	0.0699734	0.0298259	0.256993	0	0	0	0	0.0272554	0	0.0169415	0.0061237	0	0	0	0	0	0	0	0	0.0588466	0	0.0607441	0	0	0.229119	0.107585	0.252677	0.594544	0.216937	0.0452694	0.0321027	0.0378215	0	0.0680272	0	0	0	0.0482102	0	0	0	0.0104603	0	0.0489117
Actinobacteria	Actinobacteria (class)	Actinomycetales	Microbacteriaceae	Clavibacter	0	0.0362811	0.0311526	0.264797	0	0	0	0	0	0	0	0	0	0	0	0	0	0	0	0	0	0	0	0	0	0.0520725	0.0418385	0.0842257	0.198181	0.0309909	0.0452694	0.0642055	0.0378215	0	0	0	0	0	0	0	0	0	0	0	0
Proteobacteria	Gammaproteobacteria	Pasteurellales	Pasteurellaceae	Basfia	0.00309842	0.0277168	0.0319326	0.267808	0	0	0	0	0	0	0.00564717	0.0061237	0.00796495	0	0	0	0	0.0453309	0	0	0	0	0	0	0	0.104145	0.0478154	0.0842257	0.0233155	0.108468	0.226347	0	0.0378215	0	0	0.0244439	0	0.0363372	0	0	0	0	0	0	0
Firmicutes	Clostridia	Thermoanaerobacterales	Thermoanaerobacteraceae	Carboxydothermus	0.000537825	0.00772118	0.0326796	0.270467	0	0	0	0	0	0	0.0112943	0	0	0	0	0	0	0	0	0	0	0	0	0	0	0.0104145	0.0179308	0.048129	0.0466309	0	0	0.0321027	0.0378215	0	0	0	0	0	0	0	0	0	0	0	0
Proteobacteria	Alphaproteobacteria	Rhizobiales	Rhizobiaceae	Rhizobium	0.00690291	0.0423201	0.0339115	0.277018	0	0.0169635	0	0	0	0	0.0282358	0.0061237	0.00796495	0.0137542	0.00674536	0	0	0	0	0	0.0196155	0	0.0455581	0	0	0.249948	0.0597693	0.192516	0.174866	0.224684	0	0	0	0.0437675	0	0	0	0	0	0	0.0124254	0	0.0104603	0	0.0244559
Actinobacteria	Actinobacteria (class)	Actinomycetales	Brevibacteriaceae	Brevibacterium	0.0458751	0.342675	0.0341709	0.275558	0	0	0	0	0	0	0	0	0	0	0	0	0	0	0.398406	0	0	0	0	0	0.564972	1.52052	0.442293	0.806161	1.79529	0.0929728	0	1.95827	1.62632	0	0.0340136	0	0	0	0	0	0	0	0	0.242131	0.0489117
Actinobacteria	Actinobacteria (class)	Actinomycetales	Dermabacteraceae	Brachybacterium	0.000583209	0.037051	0.0343417	0.27343	0	0	0	0	0	0	0	0.0122474	0	0	0	0	0	0	0	0	0	0	0	0	0	0.145803	0.0657462	0.192516	0.279785	0.0154955	0	0	0.226929	0	0	0	0	0	0	0	0	0	0	0	0
Actinobacteria	Actinobacteria (class)	Solirubrobacterales	Conexibacteraceae	Conexibacter	0	0.014733	0.0353189	0.277695	0	0	0	0	0	0	0	0	0	0	0	0	0	0	0	0	0	0	0	0	0	0.0312435	0.0298846	0.10829	0.0699464	0.0154955	0	0	0.113464	0	0	0	0	0	0	0	0	0	0	0	0
Proteobacteria	Alphaproteobacteria	Rhizobiales	Aurantimonadaceae	Aurantimonas	0.000379284	0.0129968	0.0359506	0.279172	0	0	0	0	0	0	0	0	0.00796495	0	0	0	0	0	0	0	0	0	0	0	0	0.0729015	0	0.0240645	0	0	0	0.0642055	0.075643	0	0	0	0	0	0	0	0	0	0	0	0
Proteobacteria	Alphaproteobacteria	Rhodospirillales	Rhodospirillaceae	Azospirillum	0	0.0095507	0.0361474	0.277277	0	0	0	0	0	0	0	0	0	0	0	0	0	0	0	0	0	0	0	0	0	0.062487	0.0478154	0.0120322	0.0699464	0.0464864	0	0	0	0	0	0	0	0	0	0	0	0	0	0	0
Proteobacteria	unclassified (derived from Proteobacteria)	unclassified (derived from Proteobacteria)	unclassified (derived from Proteobacteria)	Magnetococcus	0	0.00467338	0.0369915	0.280333	0	0	0	0	0	0	0	0	0	0	0	0	0	0	0	0	0	0	0	0	0	0.020829	0.00597693	0.0240645	0.0349732	0.0309909	0	0	0	0	0	0	0	0	0	0	0	0	0	0	0
Firmicutes	Bacilli	Bacillales	Bacillaceae	Bacillus	0.45911	0.19687	0.0375558	0.281221	0	0.28838	0	0	0.817661	0.673023	0.485656	0.300061	0.390283	0.330101	0.323777	0.511509	0.892857	0	0.398406	2.24719	0.0196155	0.699301	0.0303721	0.668151	0.564972	0.343678	0.125516	0.541451	0.396363	0.232432	0.950656	0.674157	0.567322	0	0	0.0244439	0	0.0363372	0.0361576	0.251889	0.124254	0	0.0156904	0.242131	0.0733676
Proteobacteria	Gammaproteobacteria	Pasteurellales	Pasteurellaceae	Histophilus	0.0102665	0.0532206	0.0384749	0.284715	0	0	0	0	0	0	0	0	0.0318598	0.0275084	0.0202361	0	0	0.135993	0	0	0	0	0	0	0	0.0937305	0.0239077	0.156419	0.0233155	0.0542341	0	0	0	0.017507	0	0	0	0.0726744	0.0482102	0	0	0	0.0366109	0	0
Actinobacteria	Actinobacteria (class)	Actinomycetales	Propionibacteriaceae	Propionibacterium	4.84815	10.8745	0.0384965	0.281562	0	0	0	0	0	0	0.0282358	0.0796081	0	0	0.00674536	18.4143	5.65476	0	2.78884	8.2397	0.0588466	33.5664	0.015186	2.44989	30.5085	31.3789	23.6866	24.9549	14.8286	6.29891	14.6673	10.8186	21.2179	0.892857	4.01361	5.20655	15.9533	3.125	1.07268	1.76322	0.994036	21.2687	2.54707	12.8329	9.48887
Proteobacteria	Alphaproteobacteria	Rhizobiales	Phyllobacteriaceae	Mesorhizobium	0.00994203	0.0429363	0.038845	0.280845	0	0	0	0	0	0	0.00564717	0.0183711	0	0	0	0	0	0	0	0	0.0784621	0	0.106302	0	0	0.114559	0.119539	0.132355	0.291443	0.0464864	0.135808	0	0.0378215	0	0	0	0	0	0	0	0.0124254	0	0	0	0
Actinobacteria	Actinobacteria (class)	Actinomycetales	Glycomycetaceae	Stackebrandtia	0.000596394	0.00934995	0.0401584	0.287041	0	0	0	0	0	0	0.00564717	0	0	0.00687711	0	0	0	0	0	0	0	0	0	0	0	0.0729015	0.0418385	0.048129	0.0466309	0.0154955	0	0	0	0.0087535	0	0	0	0	0	0	0	0	0	0	0
Actinobacteria	Actinobacteria (class)	Actinomycetales	Micrococcaceae	Kocuria	0.000291605	0.10403	0.0408822	0.288931	0	0	0	0	0	0	0	0.0061237	0	0	0	0	0	0	0	0	0	0	0	0	0	0.270777	0.083677	0.132355	0.36139	0.0464864	0.0452694	0.192616	0.26475	0.0087535	0	0.0244439	0	0	0	0	0.0248509	0	0	0	0
Proteobacteria	Gammaproteobacteria	Chromatiales	Chromatiaceae	Allochromatium	0	0.00375435	0.0433651	0.303074	0	0	0	0	0	0	0	0	0	0	0	0	0	0	0	0	0	0	0	0	0	0.0104145	0.0239077	0	0.0233155	0.0309909	0	0	0	0	0	0	0	0	0	0	0	0	0.00523013	0	0
Proteobacteria	Gammaproteobacteria	Enterobacteriales	Enterobacteriaceae	Cronobacter	0.138287	0.0402585	0.0436181	0.301492	0	0.0763359	0	0	0	0	0.0790603	0.0979792	0.183194	0.0825253	0.256324	0	0	0.679964	0.398406	0.374532	0.0196155	0	0.0911162	0	0.564972	0.0729015	0.083677	0.0601612	0.0699464	0.108468	0.271616	0.0963082	0.151286	0	0	0	0	0	0.0241051	0	0	0	0.0679916	0	0
Actinobacteria	Actinobacteria (class)	Actinomycetales	Nocardioidaceae	Aeromicrobium	0	0.0117152	0.0445301	0.304451	0	0	0	0	0	0	0	0	0	0	0	0	0	0	0	0	0	0	0	0	0	0.0312435	0.0179308	0	0.0582886	0.00774773	0	0.0642055	0.113464	0	0	0	0	0	0	0	0	0	0	0	0
Firmicutes	Bacilli	Lactobacillales	Lactobacillaceae	Pediococcus	0.0835082	0.0130478	0.0448005	0.303006	0	0.0424088	0	0	0.0545108	0.196298	0.0225887	0.0367422	0.0557547	0.0894024	0.0607083	0.255754	0	0	0	0.374532	0	0	0	0	0.564972	0.0104145	0.0179308	0.0360967	0	0	0.135808	0	0	0	0	0	0	0	0	0.125945	0	0	0	0	0
Proteobacteria	Gammaproteobacteria	Oceanospirillales	unclassified (derived from Oceanospirillales)	unclassified (derived from Oceanospirillales)	0.00137957	0	0.0448946	0.300412	0	0.00848176	0	0	0	0	0.00564717	0	0.00796495	0.00687711	0	0	0	0	0	0	0	0	0	0	0	0	0	0	0	0	0	0	0	0	0	0	0	0	0	0	0	0	0	0	0
Bacteroidetes	Bacteroidia	Bacteroidales	Porphyromonadaceae	Porphyromonas	0.0279798	0.712855	0.0457756	0.303083	0	0.00848176	0	0	0	0	0.0451773	0	0.00796495	0.0137542	0.0337268	0.255754	0	0	0	0	0	0	0	0.222717	0	0.937305	0.633554	2.34629	2.3432	0.0774773	0.0905387	6.48475	4.65204	0	0.0340136	0	0	0.0363372	0.0120525	0	0	0	0.0575314	0	0
Actinobacteria	Actinobacteria (class)	Actinomycetales	Nocardioidaceae	Kribbella	0.00283846	0.038209	0.0470195	0.308076	0	0	0	0	0	0	0.0282358	0.0244948	0	0.00687711	0	0	0	0	0	0	0	0	0	0	0	0.083316	0.0777001	0.0721935	0.279785	0.0232432	0	0.321027	0.075643	0	0	0	0	0	0	0	0	0	0	0	0
Planctomycetes	Planctomycetia	Planctomycetales	Planctomycetaceae	Rhodopirellula	0.00184098	0.0107095	0.0485105	0.314568	0	0	0	0	0	0	0.0169415	0	0.00796495	0.0137542	0	0	0	0	0	0	0	0	0	0	0	0.0104145	0.0119539	0.0120322	0.0116577	0.0619819	0	0.0642055	0.0378215	0	0	0	0	0	0	0	0	0	0	0	0
Actinobacteria	Actinobacteria (class)	Coriobacteriales	Coriobacteriaceae	Eggerthella	0.000583209	0.0110647	0.0488323	0.313424	0	0	0	0	0	0	0	0.0122474	0	0	0	0	0	0	0	0	0	0	0	0	0	0.0312435	0.0478154	0.0721935	0.0932618	0	0	0.0321027	0	0	0	0	0	0	0	0	0	0	0	0	0
Proteobacteria	Gammaproteobacteria	Aeromonadales	Aeromonadaceae	Tolumonas	0.00267197	0.0150878	0.0504698	0.320662	0	0	0	0	0	0	0	0.0061237	0	0	0	0	0	0	0	0	0.0196155	0	0.0303721	0	0	0	0.0179308	0.0120322	0	0.0387387	0.0905387	0	0.0378215	0	0	0	0	0	0	0	0	0	0.0104603	0	0
Proteobacteria	Alphaproteobacteria	Rhodobacterales	Rhodobacteraceae	Dinoroseobacter	0.000291605	0.00920247	0.0510878	0.321342	0	0	0	0	0	0	0	0.0061237	0	0	0	0	0	0	0	0	0	0	0	0	0	0.0937305	0.0119539	0.0120322	0.0349732	0	0.0452694	0.0321027	0	0	0	0	0	0	0	0	0	0	0	0	0
Proteobacteria	Alphaproteobacteria	Rhodobacterales	Rhodobacteraceae	Pseudovibrio	0	0.00151238	0.0521177	0.324574	0	0	0	0	0	0	0	0	0	0	0	0	0	0	0	0	0	0	0	0	0	0	0.00597693	0.0120322	0	0.00774773	0	0	0	0	0	0	0	0	0.0120525	0	0	0	0	0	0
Cyanobacteria	unclassified (derived from Cyanobacteria)	Chroococcales	unclassified (derived from Chroococcales)	Synechocystis	0.000537825	0.00780184	0.0556724	0.343313	0	0	0	0	0	0	0.0112943	0	0	0	0	0	0	0	0	0	0	0	0	0	0	0	0.0358616	0	0.0233155	0.0387387	0	0	0	0	0	0	0	0.0726744	0	0	0	0	0	0	0.0244559
Proteobacteria	Alphaproteobacteria	Sphingomonadales	Sphingomonadaceae	Sphingobium	0.000321208	0.0382311	0.0559029	0.341388	0	0	0	0	0	0	0	0	0	0	0.00674536	0	0	0	0	0	0	0	0	0	0	0.0312435	0.0119539	0.096258	0.198181	0.0542341	0	0.0321027	0.0378215	0.017507	0	0	0	0	0	0	0	0	0	0	0
Proteobacteria	Gammaproteobacteria	Alteromonadales	Alteromonadaceae	Marinobacter	0.016987	0.0669455	0.0564813	0.341603	0	0	0	0	0	0	0	0.0122474	0	0.0137542	0.0134907	0	0.297619	0	0	0	0.0196155	0	0	0	0	0.104145	0.0298846	0.096258	0.0233155	0.209189	0.0452694	0	0.0378215	0	0	0.0977756	0	0	0.0241051	0.125945	0.0248509	0	0	0	0
Bacteroidetes	Flavobacteriia	Flavobacteriales	Flavobacteriaceae	Capnocytophaga	0.00510073	0.0284334	0.0567355	0.339873	0	0	0	0	0	0	0.0790603	0.0061237	0	0	0.00674536	0	0	0	0	0	0	0	0.015186	0	0	0.020829	0.0239077	0.120322	0.0932618	0.0387387	0.0905387	0.0963082	0.226929	0	0	0	0	0	0	0	0	0	0	0	0
Actinobacteria	Actinobacteria (class)	Actinomycetales	Streptomycetaceae	Streptomyces	0.0539615	0.201085	0.0568098	0.337107	0	0.00848176	0	0	0	0	0.0621188	0.0367422	0.0159299	0.0343855	0.00674536	0	0.892857	0	0	0	0	0	0.0759301	0	0	0.656113	0.490108	0.830225	0.990907	0.348648	0.135808	0.545746	0.718608	0	0	0.0244439	0	0	0	0	0	0	0.00523013	0.121065	0.0489117
Actinobacteria	Actinobacteria (class)	Actinomycetales	Pseudonocardiaceae	Thermobispora	0	0.00859116	0.0590764	0.347281	0	0	0	0	0	0	0	0	0	0	0	0	0	0	0	0	0	0	0	0	0	0.0520725	0.0298846	0.0240645	0.0932618	0.0154955	0	0	0	0	0	0	0	0	0	0	0	0	0	0	0
Proteobacteria	Gammaproteobacteria	Methylococcales	Methylococcaceae	Methylococcus	0.00265841	0.0131313	0.0593115	0.345435	0	0	0	0	0	0	0.0225887	0	0	0.00687711	0.00674536	0	0	0	0	0	0.0196155	0	0	0	0	0.041658	0.0358616	0.0240645	0.0466309	0.0774773	0.0905387	0	0	0	0	0	0	0	0.0120525	0	0	0	0	0	0
Proteobacteria	Gammaproteobacteria	Pseudomonadales	Pseudomonadaceae	Azotobacter	0.00712471	0.0750131	0.0600828	0.346717	0	0	0	0	0	0	0	0	0.00796495	0.00687711	0	0	0	0	0	0	0.0588466	0	0.0759301	0	0	0.020829	0.0597693	0	0.0116577	0.767026	0	0	0	0.0262605	0	0	0	0.145349	0.0602627	0	0	0.373134	0.0313808	0	0
Proteobacteria	Gammaproteobacteria	Chromatiales	Ectothiorhodospiraceae	Halorhodospira	0.000268913	0.00388793	0.0612191	0.350062	0	0	0	0	0	0	0.00564717	0	0	0	0	0	0	0	0	0	0	0	0	0	0	0.0104145	0	0.0120322	0.0116577	0.0309909	0	0.0321027	0	0	0	0	0	0	0	0	0	0	0	0	0
Proteobacteria	Alphaproteobacteria	Rhizobiales	Phyllobacteriaceae	Pseudaminobacter	0	0.00409644	0.0612619	0.347151	0	0	0	0	0	0	0	0	0	0	0	0	0	0	0	0	0	0	0	0	0	0.020829	0	0	0.0116577	0	0	0.0321027	0.0378215	0	0	0	0	0	0	0	0	0	0	0	0
Proteobacteria	Gammaproteobacteria	Alteromonadales	Idiomarinaceae	Idiomarina	0.000934073	0.00688171	0.0616722	0.346355	0	0	0	0	0	0	0	0	0	0	0	0	0	0	0	0	0.0196155	0	0	0	0	0.0104145	0	0.0360967	0.0233155	0.0464864	0.0452694	0	0	0	0	0	0	0	0	0	0	0	0.0104603	0	0
Proteobacteria	Alphaproteobacteria	Rickettsiales	Rickettsiaceae	Rickettsia	0.0808118	0.00386139	0.0618977	0.344546	0	0	0	0	0	0	0	0	0.0557547	0.0275084	0	0	0.297619	0	0	0.374532	0.0196155	0.699301	0	0.222717	0	0	0.00597693	0	0.0116577	0	0	0.0321027	0	0	0	0	0	0.0363372	0	0	0	0	0.0104603	0	0
Firmicutes	Clostridia	Clostridiales	Lachnospiraceae	Anaerostipes	0.000291605	0.00442905	0.0620084	0.342134	0	0	0	0	0	0	0	0.0061237	0	0	0	0	0	0	0	0	0	0	0	0	0	0.0312435	0	0.0240645	0.0233155	0	0	0.0321027	0	0	0	0	0	0	0	0	0	0	0	0	0
Verrucomicrobia	Verrucomicrobiae	Verrucomicrobiales	Verrucomicrobiaceae	Verrucomicrobium	0.00194096	0.0103179	0.0620116	0.339177	0	0	0	0	0	0	0.033883	0	0	0.00687711	0	0	0	0	0	0	0	0	0	0	0	0	0.0119539	0	0.0116577	0.0542341	0	0	0	0	0	0	0	0	0.0241051	0	0.0248509	0	0	0	0
Firmicutes	Bacilli	Bacillales	Staphylococcaceae	Macrococcus	0.0187053	0.00499252	0.0622366	0.337473	0	0.0339271	0	0	0.109022	0.0280426	0.0621188	0.0551133	0.0637196	0.0206313	0.0202361	0	0	0	0	0	0	0	0	0	0	0.0104145	0	0	0	0.00774773	0.0452694	0	0	0	0	0	0	0	0.0241051	0	0.0372763	0	0	0	0
Chloroflexi	Dehalococcoidetes	unclassified (derived from Dehalococcoidetes)	unclassified (derived from Dehalococcoidetes)	Dehalogenimonas	0.00162486	0.0116022	0.0639318	0.343702	0	0	0	0	0	0	0	0	0	0.0206313	0.0134907	0	0	0	0	0	0	0	0	0	0	0.0104145	0.00597693	0	0	0	0	0	0.0378215	0	0	0.0488878	0	0	0.0120525	0	0	0	0.00523013	0	0
Actinobacteria	Actinobacteria (class)	Coriobacteriales	Coriobacteriaceae	Gordonibacter	0	0.00255011	0.064181	0.342117	0	0	0	0	0	0	0	0	0	0	0	0	0	0	0	0	0	0	0	0	0	0.020829	0.00597693	0	0.0233155	0	0	0	0	0	0	0	0	0	0	0	0	0	0	0	0
Proteobacteria	Gammaproteobacteria	Chromatiales	Ectothiorhodospiraceae	Thioalkalivibrio	0.00280681	0.0148255	0.0645062	0.340961	0	0	0	0	0	0	0.00564717	0	0.00796495	0	0	0	0	0.0453309	0	0	0	0	0	0	0	0.041658	0.0119539	0.048129	0.0233155	0.108468	0.0905387	0	0.0378215	0.0087535	0	0	0	0	0	0	0	0	0	0	0
Proteobacteria	Gammaproteobacteria	Chromatiales	Ectothiorhodospiraceae	Alkalilimnicola	0.00240597	0.0170446	0.0650722	0.341087	0	0	0	0	0	0	0.0112943	0	0	0	0	0	0	0	0	0	0.0392311	0	0	0	0	0	0.0298846	0	0.0582886	0.0309909	0.0452694	0	0	0.0087535	0	0.0244439	0	0	0	0	0	0	0.041841	0	0
Proteobacteria	Gammaproteobacteria	Oceanospirillales	Hahellaceae	Hahella	0.000934073	0.00761921	0.0656836	0.341446	0	0	0	0	0	0	0	0	0	0	0	0	0	0	0	0	0.0196155	0	0	0	0	0.020829	0.0119539	0.0120322	0.0349732	0.0464864	0	0.0642055	0	0	0	0	0	0	0	0	0	0	0	0	0
Proteobacteria	Alphaproteobacteria	Rhizobiales	Xanthobacteraceae	Starkeya	0	0.00928583	0.06603	0.340434	0	0	0	0	0	0	0	0	0	0	0	0	0	0	0	0	0	0	0	0	0	0	0	0	0.0349732	0.0309909	0.0905387	0	0.075643	0	0	0	0	0	0	0	0	0	0	0	0
Proteobacteria	Gammaproteobacteria	Enterobacteriales	Enterobacteriaceae	Erwinia	0.274136	0.0801129	0.0662692	0.338889	0	0.0508906	0	0	0	0	0.0903546	0.0183711	0.119474	0.0756482	0.107926	0	0.892857	0	0	0.749064	0.156924	1.3986	0.0759301	0.890869	1.12994	0.020829	0.0358616	0.0842257	0.0582886	0.123964	0.271616	0.0963082	0.075643	0.0087535	0.0340136	0.0488878	0	0.0726744	0	0	0	0.746269	0.0104603	0	0.0489117
Proteobacteria	Gammaproteobacteria	Xanthomonadales	Xanthomonadaceae	Pseudoxanthomonas	0	0.00224759	0.0664005	0.336822	0	0	0	0	0	0	0	0	0	0	0	0	0	0	0	0	0	0	0	0	0	0	0.0119539	0.0120322	0	0.00774773	0	0	0	0	0	0	0	0	0	0	0	0	0	0	0.0244559
Firmicutes	Clostridia	Clostridiales	Clostridiales Family XVII. Incertae Sedis	Thermaerobacter	0	0.00248325	0.0664094	0.334172	0	0	0	0	0	0	0	0	0	0	0	0	0	0	0	0	0	0	0	0	0	0.020829	0.00597693	0.0120322	0	0.0232432	0	0	0	0	0	0	0	0	0	0	0	0	0	0	0
Bacteroidetes	Bacteroidia	Bacteroidales	Porphyromonadaceae	Parabacteroides	0.00841763	0.220174	0.0669014	0.333976	0	0	0	0	0	0	0.101649	0	0	0.0481397	0.0269815	0	0	0	0	0	0	0	0	0	0	0.291606	0.131492	0.565516	0.606202	0.0619819	0	2.43981	1.32375	0	0.0340136	0	0	0.0363372	0	0	0	0	0	0	0
Actinobacteria	Actinobacteria (class)	Actinomycetales	Segniliparaceae	Segniliparus	0.00296072	0.0112946	0.067114	0.332399	0	0	0	0	0.0272554	0.0280426	0	0	0	0.00687711	0	0	0	0	0	0	0	0	0	0	0	0.0312435	0.00597693	0.0240645	0.0582886	0.0154955	0.0452694	0.0642055	0.0378215	0	0	0	0	0	0	0	0	0	0	0	0
Firmicutes	Clostridia	Clostridiales	Eubacteriaceae	Pseudoramibacter	0	0.00311612	0.0694078	0.341074	0	0	0	0	0	0	0	0	0	0	0	0	0	0	0	0	0	0	0	0	0	0.0104145	0.00597693	0.0120322	0.0116577	0	0	0	0.0378215	0	0	0	0	0	0	0	0	0	0	0	0
Proteobacteria	Alphaproteobacteria	Rhizobiales	Phyllobacteriaceae	Chelativorans	0.00112795	0.00875267	0.0695494	0.339121	0	0	0	0	0	0	0.0169415	0	0	0	0.00674536	0	0	0	0	0	0	0	0	0	0	0.083316	0	0.048129	0.0233155	0.0154955	0	0	0	0	0	0	0	0	0.0241051	0	0	0	0	0	0.0244559
Chloroflexi	Chloroflexi (class)	Herpetosiphonales	Herpetosiphonaceae	Herpetosiphon	0.000806738	0.0116129	0.0712863	0.344916	0	0	0	0	0	0	0.0169415	0	0	0	0	0	0	0	0	0	0	0	0	0	0	0.0312435	0	0.0240645	0.0116577	0.0309909	0.135808	0.0321027	0	0	0	0	0	0	0	0	0	0	0	0	0.0244559
Bacteroidetes	Cytophagia	Cytophagales	Flammeovirgaceae	Marivirga	0.0108779	0.000932618	0.0721409	0.346387	0	0.00848176	0	0	0	0	0.0282358	0.0183711	0.0238949	0.0550168	0.0944351	0	0	0	0	0	0	0	0	0	0	0	0	0	0.0233155	0	0	0	0	0	0	0	0	0	0	0	0	0	0	0	0
Firmicutes	Clostridia	Clostridiales	Clostridiales Family XI. Incertae Sedis	Anaerococcus	0.0822704	0.368066	0.0762608	0.363394	0	0.0508906	0	0	0	0.0280426	0.0451773	0.061237	0.0557547	0.061894	0.00674536	0	0	0	1.19522	0	0	0	0	0.222717	0	0.520725	0.286893	1.40777	2.42481	0.0697296	0.316885	2.50401	1.17247	0.0087535	0.0680272	0	0	0	0	0	0.124254	0	0.00523013	0	0
Proteobacteria	Betaproteobacteria	Burkholderiales	Burkholderiaceae	Cupriavidus	0.748143	1.68853	0.0778418	0.368139	0	0	0	0	0	0	0.0169415	0.0061237	0	0	0.0269815	4.34783	0	0	0	0	5.37466	0.699301	5.23918	0	0	0.354093	2.31905	0.288774	0.303101	1.31711	0.181077	0	0.189107	4.32423	2.85714	4.93767	0	3.7064	4.78486	2.89673	1.15557	0.373134	2.31695	0.726392	3.7662
Gemmatimonadetes	Gemmatimonadetes (class)	Gemmatimonadales	Gemmatimonadaceae	Gemmatimonas	0.00223087	0.0289414	0.0780703	0.366465	0	0	0	0	0	0	0.0112943	0	0	0.00687711	0.0134907	0	0	0	0	0	0	0	0.015186	0	0	0	0.00597693	0.0360967	0.0116577	0.0464864	0	0	0	0	0	0	0	0	0	0	0	0	0.0209205	0	0.0733676
Firmicutes	Clostridia	Natranaerobiales	Natranaerobiaceae	Natranaerobius	0	0.00264829	0.0783329	0.364973	0	0	0	0	0	0	0	0	0	0	0	0	0	0	0	0	0	0	0	0	0	0.0104145	0	0.0120322	0.0116577	0	0	0.0321027	0	0	0	0	0	0	0	0	0	0	0	0	0
Proteobacteria	Deltaproteobacteria	Desulfuromonadales	Geobacteraceae	Geobacter	0.00834235	0.0278926	0.0784183	0.362685	0	0	0	0	0	0.0280426	0.107296	0.0061237	0	0	0.0337268	0	0	0	0	0	0	0	0	0	0	0.041658	0.0119539	0.0360967	0.0816041	0.209189	0.0452694	0.0642055	0	0.0087535	0	0.0488878	0	0	0	0	0	0	0.0104603	0	0
Firmicutes	Erysipelotrichi	Erysipelotrichales	Erysipelotrichaceae	Holdemania	0.00158158	0.00972006	0.0785101	0.360459	0	0	0	0	0	0	0	0.0183711	0.00796495	0.00687711	0	0	0	0	0	0	0	0	0	0	0	0	0.0298846	0.0360967	0.0466309	0.00774773	0.0905387	0.0321027	0	0	0	0	0	0	0	0	0	0	0	0	0
Cyanobacteria	unclassified (derived from Cyanobacteria)	Chroococcales	unclassified (derived from Chroococcales)	Synechococcus	0.00368941	0.0214868	0.0795449	0.362563	0	0.00848176	0	0	0	0	0.0621188	0	0	0.00687711	0	0	0	0	0	0	0	0	0	0	0	0.0312435	0.0239077	0.132355	0.0932618	0.0697296	0	0	0	0	0	0	0	0	0	0	0	0	0.0104603	0	0
Proteobacteria	Alphaproteobacteria	Rhodobacterales	Rhodobacteraceae	Rhodobacter	0.00208471	0.0359082	0.0802182	0.363002	0	0	0	0	0	0	0.0112943	0.0061237	0	0	0.00674536	0	0	0	0	0	0.0196155	0	0	0	0	0.385336	0.0298846	0.0360967	0.0816041	0.0774773	0.271616	0	0	0	0	0	0	0	0	0	0	0	0.0156904	0	0
Nitrospirae	Nitrospira (class)	Nitrospirales	Nitrospiraceae	Leptospirillum	0.000268913	0.00252763	0.0810079	0.363957	0	0	0	0	0	0	0.00564717	0	0	0	0	0	0	0	0	0	0	0	0	0	0	0	0.00597693	0.0120322	0	0.0154955	0	0	0	0	0	0	0	0	0	0	0	0	0.00523013	0	0.0244559
Actinobacteria	Actinobacteria (class)	Rubrobacterales	Rubrobacteraceae	Rubrobacter	0.000268913	0.0049803	0.0813778	0.363026	0	0	0	0	0	0	0.00564717	0	0	0	0	0	0	0	0	0	0	0	0	0	0	0.0104145	0	0.048129	0.0349732	0.0309909	0	0	0	0	0	0	0	0	0	0	0	0	0	0	0
Proteobacteria	Gammaproteobacteria	Oceanospirillales	Halomonadaceae	Chromohalobacter	0.0014719	0.0194413	0.0827479	0.366538	0	0	0	0	0	0	0.0112943	0	0	0	0	0	0	0	0	0	0.0196155	0	0	0	0	0.0520725	0.0298846	0.0360967	0	0.0154955	0.0452694	0	0.0378215	0	0	0	0	0	0	0	0	0	0	0.242131	0
Cyanobacteria	unclassified (derived from Cyanobacteria)	Nostocales	Nostocaceae	Anabaena	0.000268913	0.00312547	0.0829352	0.364799	0	0	0	0	0	0	0.00564717	0	0	0	0	0	0	0	0	0	0	0	0	0	0	0.0104145	0.00597693	0	0.0233155	0.0309909	0	0	0	0	0	0	0	0	0	0	0	0	0	0	0
Firmicutes	Negativicutes	Selenomonadales	Veillonellaceae	Megasphaera	0.000291605	0.0029582	0.0829756	0.362442	0	0	0	0	0	0	0	0.0061237	0	0	0	0	0	0	0	0	0	0	0	0	0	0.0104145	0	0.0120322	0.0116577	0.00774773	0	0.0321027	0	0	0	0	0	0	0	0	0	0	0	0	0
Proteobacteria	Alphaproteobacteria	Caulobacterales	Caulobacteraceae	Brevundimonas	0.000268913	0.0180512	0.0835258	0.362329	0	0	0	0	0	0	0.00564717	0	0	0	0	0	0	0	0	0	0	0	0	0	0	0	0.0179308	0.0240645	0.0116577	0.0232432	0	0	0	0	0.0680272	0.0244439	0	0	0	0	0	0	0.0261506	0.242131	0
Bacteroidetes	unclassified (derived from Bacteroidetes)	unclassified (derived from Bacteroidetes)	unclassified (derived from Bacteroidetes)	Candidatus Amoebophilus	0.000917602	0	0.0840844	0.362254	0	0	0	0	0	0	0.00564717	0	0	0.00687711	0.00674536	0	0	0	0	0	0	0	0	0	0	0	0	0	0	0	0	0	0	0	0	0	0	0	0	0	0	0	0	0	0
Deinococcus-Thermus	Deinococci	Thermales	Thermaceae	Meiothermus	0.000806738	0.00455282	0.0844411	0.361316	0	0	0	0	0	0	0.0169415	0	0	0	0	0	0	0	0	0	0	0	0	0	0	0.0312435	0.0119539	0.0240645	0.0233155	0.0232432	0	0	0	0	0	0	0	0	0	0	0	0	0	0	0
Proteobacteria	Alphaproteobacteria	Rhizobiales	Beijerinckiaceae	Beijerinckia	0.000723144	0.00775623	0.0844622	0.358964	0	0	0	0	0	0	0	0	0	0	0	0	0	0	0	0	0	0	0.015186	0	0	0.0520725	0.0119539	0.0240645	0	0.0154955	0	0	0	0.0087535	0	0	0	0	0	0	0	0	0	0	0
Proteobacteria	Gammaproteobacteria	Alteromonadales	unclassified (derived from Alteromonadales)	unclassified (derived from Alteromonadales)	0	0.00123303	0.0851866	0.359613	0	0	0	0	0	0	0	0	0	0	0	0	0	0	0	0	0	0	0	0	0	0.0104145	0	0	0.0116577	0	0	0	0	0.0087535	0	0	0	0	0	0	0	0	0	0	0
Proteobacteria	Alphaproteobacteria	Rhodospirillales	unclassified (derived from Rhodospirillales)	unclassified (derived from Rhodospirillales)	0.000975677	0	0.086055	0.360857	0	0	0	0	0	0	0.00564717	0	0.00796495	0.00687711	0	0	0	0	0	0	0	0	0	0	0	0	0	0	0	0	0	0	0	0	0	0	0	0	0	0	0	0	0	0	0
Proteobacteria	Deltaproteobacteria	Desulfobacterales	Desulfobacteraceae	Desulfobacterium	0	0.0023856	0.0874062	0.364096	0	0	0	0	0	0	0	0	0	0	0	0	0	0	0	0	0	0	0	0	0	0.020829	0	0	0.0233155	0.0154955	0	0	0	0	0	0	0	0	0	0	0	0	0	0	0
Proteobacteria	Gammaproteobacteria	Alteromonadales	Ferrimonadaceae	Ferrimonas	0	0.000816667	0.0874406	0.361843	0	0	0	0	0	0	0	0	0	0	0	0	0	0	0	0	0	0	0	0	0	0	0	0	0	0.00774773	0	0	0	0	0	0	0	0	0	0	0	0	0.00523013	0	0
Chloroflexi	Ktedonobacteria	Ktedonobacterales	Ktedonobacteraceae	Ktedonobacter	0.000806738	0.00505208	0.0883747	0.363318	0	0	0	0	0	0	0.0169415	0	0	0	0	0	0	0	0	0	0	0	0	0	0	0.041658	0.0179308	0.0240645	0.0116577	0.0309909	0	0	0	0	0	0	0	0	0	0	0	0	0	0	0
Firmicutes	Clostridia	Clostridiales	Clostridiaceae	Alkaliphilus	0.00745078	0.0317124	0.0886769	0.362193	0	0	0	0	0	0.0280426	0.0564717	0.0367422	0.00796495	0.0137542	0.0134907	0	0	0	0	0	0	0	0	0	0	0.062487	0.0239077	0.156419	0.198181	0	0	0.224719	0.113464	0	0	0	0	0	0	0	0	0	0	0	0
Verrucomicrobia	Verrucomicrobiae	Verrucomicrobiales	Verrucomicrobia subdivision 3	Pedosphaera	0.000327481	0.00454561	0.0888333	0.360491	0	0	0	0	0	0	0	0	0	0.00687711	0	0	0	0	0	0	0	0	0	0	0	0	0.0119539	0.0240645	0.0466309	0.0309909	0	0	0	0	0	0	0	0	0	0	0	0	0	0	0
Proteobacteria	Alphaproteobacteria	Rhodobacterales	Rhodobacteraceae	unclassified (derived from Rhodobacteraceae)	0	0.00362339	0.0889101	0.35849	0	0	0	0	0	0	0	0	0	0	0	0	0	0	0	0	0	0	0	0	0	0.0104145	0	0	0.0116577	0.0232432	0.0452694	0	0	0	0	0	0	0	0	0	0	0	0	0	0
Bacteroidetes	unclassified (derived from Bacteroidetes)	unclassified (derived from Bacteroidetes)	unclassified (derived from Bacteroidetes)	unclassified (derived from Bacteroidetes)	0.000327481	0.00599126	0.0895409	0.358734	0	0	0	0	0	0	0	0	0	0.00687711	0	0	0	0	0	0	0	0	0	0	0	0	0	0.0360967	0.0116577	0	0	0.0642055	0.0378215	0	0	0	0	0	0	0	0	0	0	0	0
Proteobacteria	Deltaproteobacteria	Desulfobacterales	Desulfobulbaceae	Desulfotalea	0.000923875	0.00918214	0.0908139	0.361531	0	0	0	0	0	0	0.00564717	0	0	0.0137542	0	0	0	0	0	0	0	0	0	0	0	0.0104145	0.00597693	0.0120322	0.0116577	0.00774773	0	0	0	0	0	0	0	0	0.0120525	0	0	0	0	0	0
Proteobacteria	Gammaproteobacteria	unclassified (derived from Gammaproteobacteria)	unclassified (derived from Gammaproteobacteria)	unclassified (derived from Gammaproteobacteria)	0.00338979	0.0111868	0.0909422	0.359765	0	0.00848176	0	0	0	0	0.0225887	0	0	0.0137542	0.00674536	0	0	0	0	0	0.0196155	0	0	0	0	0	0.00597693	0.0240645	0.0466309	0.0464864	0	0	0.0378215	0	0	0	0	0	0	0	0	0	0.00523013	0	0.0244559
Actinobacteria	Actinobacteria (class)	Actinomycetales	Micrococcaceae	Rothia	0.0557033	0.167319	0.0919861	0.36162	0	0	0	0	0	0	0	0	0.0398248	0	0	0	0	0	0	0	0	0	0	0	1.12994	0.239533	0.0717231	0.348935	0.314759	0.108468	0.0905387	0.674157	0.453858	0	0.272109	0.0488878	0	0	0.0482102	0.377834	0.0372763	0	0.0523013	0.242131	0.244559
Proteobacteria	Alphaproteobacteria	Rhodobacterales	Rhodobacteraceae	Roseobacter	0.00144629	0.0236647	0.0922075	0.360239	0	0	0	0	0	0	0	0	0	0	0	0	0	0	0	0	0	0	0.0303721	0	0	0.187461	0.0239077	0	0.0116577	0.0464864	0	0.0321027	0	0	0	0	0	0	0.0120525	0	0	0	0	0	0
Proteobacteria	Deltaproteobacteria	Myxococcales	Myxococcaceae	Anaeromyxobacter	0.00525481	0.0186028	0.0926476	0.359724	0	0	0	0	0	0	0.0451773	0	0	0	0	0	0	0	0	0	0.0196155	0	0.0455581	0	0	0	0.0478154	0.048129	0.0932618	0.123964	0	0.0642055	0.075643	0	0	0	0	0	0.0120525	0	0	0	0	0	0
Deferribacteres	Deferribacteres (class)	Deferribacterales	Deferribacteraceae	Deferribacter	0	0.00113695	0.0949554	0.366423	0	0	0	0	0	0	0	0	0	0	0	0	0	0	0	0	0	0	0	0	0	0.0104145	0.00597693	0.0120322	0	0	0	0	0	0	0	0	0	0	0	0	0	0	0	0	0
Proteobacteria	Gammaproteobacteria	Pseudomonadales	Moraxellaceae	Psychrobacter	0.0108379	0.388096	0.0952143	0.365182	0	0.127226	0	0	0	0	0	0	0	0	0.0202361	0	0	0.0453309	0	0	0.0196155	0	0.015186	0	0	0.708186	0.173331	0.878354	0.186524	5.43891	0.633771	0.0642055	0.226929	0	0	0	0.389105	0.0363372	0.0964204	0	0	0	0.083682	0	0
Chloroflexi	Dehalococcoidetes	unclassified (derived from Dehalococcoidetes)	unclassified (derived from Dehalococcoidetes)	Dehalococcoides	0.0600949	0.0103022	0.0958429	0.365365	0	0.0593723	0	0	0	0	0.033883	0.0551133	0.0477897	0.0137542	0.0202361	0.511509	0.297619	0	0	0	0	0	0	0.222717	0	0	0.00597693	0.048129	0.0582886	0.0154955	0.0452694	0	0.075643	0.0087535	0	0	0	0	0	0	0	0	0	0	0
Bacteroidetes	Bacteroidia	Bacteroidales	Porphyromonadaceae	Paludibacter	0.00348779	0.0353157	0.096066	0.364009	0	0	0	0	0	0	0.033883	0.0122474	0	0.00687711	0.0202361	0	0	0	0	0	0	0	0	0	0	0.041658	0.0119539	0.0842257	0.0816041	0.00774773	0	0.35313	0.302572	0	0	0	0	0	0	0	0	0	0	0	0
Actinobacteria	Actinobacteria (class)	Coriobacteriales	Coriobacteriaceae	Slackia	0.000327481	0.00604174	0.0974153	0.366912	0	0	0	0	0	0	0	0	0	0.00687711	0	0	0	0	0	0	0	0	0	0	0	0.0312435	0	0.0120322	0.0699464	0	0	0	0.0378215	0	0	0	0	0	0	0	0	0	0	0	0
Proteobacteria	Betaproteobacteria	Hydrogenophilales	Hydrogenophilaceae	Thiobacillus	0.00216943	0.00897698	0.0981658	0.367537	0	0	0	0	0	0	0	0	0	0	0	0	0	0	0	0	0	0	0.0455581	0	0	0.020829	0.0239077	0	0.0349732	0.0619819	0	0	0.0378215	0.0087535	0	0	0	0	0.0361576	0	0	0	0	0	0
Proteobacteria	Betaproteobacteria	Neisseriales	Neisseriaceae	Chromobacterium	0.0212899	0.0658012	0.0991519	0.369033	0	0.00848176	0	0	0	0	0.033883	0	0	0	0.0202361	0	0	0.0453309	0	0	0.156924	0	0.182232	0	0	0.218704	0.125516	0.204548	0.116577	0.247927	0.497963	0	0.0378215	0	0.0340136	0	0	0	0	0	0	0	0	0.121065	0
Firmicutes	Bacilli	Lactobacillales	Aerococcaceae	Abiotrophia	0	0.00502868	0.100552	0.372041	0	0	0	0	0	0	0	0	0	0	0	0	0	0	0	0	0	0	0	0	0	0	0	0.0120322	0.0116577	0	0	0.0642055	0.0378215	0	0	0	0	0	0	0	0	0	0	0	0
Proteobacteria	Betaproteobacteria	Methylophilales	Methylophilaceae	Methylovorus	0.00162957	0.0197925	0.100984	0.371454	0	0.00848176	0	0	0	0	0	0.0061237	0	0	0	0	0	0	0	0	0.0196155	0	0	0	0	0	0.0239077	0	0.0349732	0.0774773	0	0	0	0.0087535	0	0.0244439	0	0	0	0.251889	0	0	0	0	0.0733676
Cyanobacteria	unclassified (derived from Cyanobacteria)	Chroococcales	unclassified (derived from Chroococcales)	Cyanothece	0.111265	0.00924803	0.101171	0.369982	0	0.0169635	0	0	0	0	0.0169415	0	0.00796495	0.0343855	0	0	0.892857	0	0	0	0	0.699301	0	0.668151	0	0.0104145	0.0119539	0.0240645	0.0466309	0.0154955	0.0905387	0.0321027	0	0	0	0	0	0	0	0	0	0	0	0	0
Bacteroidetes	Sphingobacteriia	Sphingobacteriales	unclassified (derived from Sphingobacteriales)	Chitinophaga	0.0899378	0.0110339	0.102837	0.373898	0	0.00848176	0	0	0	0	0.858369	0.226577	0.0318598	0.35761	0.370995	0	0	0	0	0	0.0196155	0	0.015186	0	0	0.0104145	0.0298846	0.048129	0.116577	0.0387387	0	0.0321027	0	0	0	0	0	0	0	0	0	0	0	0	0
Proteobacteria	Alphaproteobacteria	Caulobacterales	Caulobacteraceae	Caulobacter	0.00682274	0.057332	0.106083	0.383483	0	0	0	0	0	0	0.0169415	0	0	0	0.00674536	0	0	0	0	0	0.0588466	0	0.0607441	0	0	0	0.0418385	0.0721935	0.0466309	0.108468	0.0452694	0	0	0	0	0.146663	0	0	0	0	0	0	0	0	0.171191
Cyanobacteria	unclassified (derived from Cyanobacteria)	Nostocales	Nostocaceae	Nostoc	0.00179879	0.00990727	0.106412	0.382477	0	0	0	0	0	0	0.0225887	0	0	0	0	0	0	0	0	0	0	0	0.015186	0	0	0.0520725	0.0179308	0	0	0.0154955	0.0905387	0.0642055	0	0	0	0	0	0	0	0	0	0	0	0	0
Proteobacteria	Betaproteobacteria	Rhodocyclales	Rhodocyclaceae	Thauera	0	0.0180961	0.10655	0.380797	0	0	0	0	0	0	0	0	0	0	0	0	0	0	0	0	0	0	0	0	0	0.020829	0.0239077	0.0360967	0	0.0619819	0.0452694	0	0	0	0	0	0	0	0	0	0	0	0	0	0
Proteobacteria	Alphaproteobacteria	Caulobacterales	Caulobacteraceae	Phenylobacterium	0.00107565	0.0059278	0.107327	0.381405	0	0	0	0	0	0	0.0225887	0	0	0	0	0	0	0	0	0	0	0	0	0	0	0	0.00597693	0.0120322	0.0233155	0.00774773	0	0	0	0	0.0340136	0	0	0	0	0	0	0	0	0	0
Proteobacteria	Betaproteobacteria	Methylophilales	Methylophilaceae	Methylotenera	0.0021723	0.0276115	0.108335	0.382825	0	0	0	0	0	0	0.0169415	0	0	0	0.0134907	0	0	0	0	0	0	0	0.015186	0	0	0.020829	0.00597693	0.0120322	0.0233155	0.0387387	0.0905387	0.0321027	0	0	0	0	0	0	0.0120525	0	0	0.373134	0	0	0
Proteobacteria	Betaproteobacteria	Burkholderiales	unclassified (derived from Burkholderiales)	unclassified (derived from Burkholderiales)	0	0.00266327	0.109534	0.384898	0	0	0	0	0	0	0	0	0	0	0	0	0	0	0	0	0	0	0	0	0	0.0104145	0	0.0240645	0	0	0	0.0321027	0	0	0	0	0	0	0	0	0	0	0	0	0
Proteobacteria	Alphaproteobacteria	Rhodospirillales	Acetobacteraceae	Acidiphilium	0.00243835	0.0134151	0.11016	0.384947	0	0	0	0	0	0	0.00564717	0	0	0	0	0	0	0	0	0	0	0	0.0455581	0	0	0.0937305	0.0179308	0	0.0699464	0.0309909	0	0	0	0	0	0	0	0	0	0	0	0	0	0	0
Cyanobacteria	unclassified (derived from Cyanobacteria)	Chroococcales	unclassified (derived from Chroococcales)	Microcystis	0.000537825	0.00428156	0.111863	0.388739	0	0	0	0	0	0	0.0112943	0	0	0	0	0	0	0	0	0	0	0	0	0	0	0	0.00597693	0.0120322	0.0116577	0	0.0452694	0.0321027	0	0	0	0	0	0	0	0	0	0	0	0	0
Actinobacteria	Actinobacteria (class)	Actinomycetales	Nocardioidaceae	Nocardioides	0.0230613	0.132557	0.116339	0.402073	0	0.00848176	0	0	0	0	0	0	0	0	0	0	0	0	0	0	0	0	0.0303721	0.445434	0	0.187461	0.131492	0.192516	0.384705	0.0232432	0	0.417335	0.226929	0.0087535	0	0	1.55642	0	0.0120525	0	0	0	0	0	0
Firmicutes	Erysipelotrichi	Erysipelotrichales	Erysipelotrichaceae	Solobacterium	0.000291605	0.00293709	0.116402	0.400092	0	0	0	0	0	0	0	0.0061237	0	0	0	0	0	0	0	0	0	0	0	0	0	0	0.00597693	0.0120322	0.0233155	0	0	0.0321027	0	0	0	0	0	0	0	0	0	0	0	0	0
Proteobacteria	Betaproteobacteria	unclassified (derived from Betaproteobacteria)	unclassified (derived from Betaproteobacteria)	unclassified (derived from Betaproteobacteria)	0	0.00308013	0.11756	0.401877	0	0	0	0	0	0	0	0	0	0	0	0	0	0	0	0	0	0	0	0	0	0	0.0119539	0.0120322	0	0.00774773	0.0452694	0	0	0	0	0	0	0	0	0	0	0	0	0	0
Proteobacteria	Betaproteobacteria	Burkholderiales	Alcaligenaceae	Taylorella	0.000934073	0.00749663	0.117795	0.400503	0	0	0	0	0	0	0	0	0	0	0	0	0	0	0	0	0.0196155	0	0	0	0	0.020829	0	0.0360967	0	0.0154955	0.0905387	0	0	0	0	0	0	0	0	0	0	0	0	0	0.0244559
Proteobacteria	Gammaproteobacteria	Enterobacteriales	Enterobacteriaceae	Proteus	4.44784	0.024227	0.1178	0.398367	0	0.0678541	0	0	0.0545108	0.0280426	0.0282358	0.0122474	0.0796495	0.061894	0.0607083	0.511509	0.297619	37.67	44.6215	8.98876	0	0.699301	0	0.222717	0	0.041658	0	0.0721935	0.0816041	0.0929728	0.135808	0.0321027	0.0378215	0.017507	0	0	0	0.0363372	0	0	0	0	0	0	0
Proteobacteria	Deltaproteobacteria	Desulfobacterales	Desulfobacteraceae	Desulfatibacillum	0.000723144	0.0041947	0.118086	0.397199	0	0	0	0	0	0	0	0	0	0	0	0	0	0	0	0	0	0	0.015186	0	0	0.0104145	0.0119539	0	0.0116577	0.0387387	0	0.0321027	0	0	0	0	0	0	0	0	0	0	0	0	0
Fusobacteria	Fusobacteriia	Fusobacteriales	Fusobacteriaceae	Fusobacterium	0.00624219	0.0183709	0.118292	0.395774	0	0.00848176	0	0	0.0272554	0.0280426	0.0169415	0.0367422	0	0.00687711	0.00674536	0	0	0	0	0	0	0	0	0	0	0.020829	0	0.0842257	0.0932618	0	0.0905387	0.0321027	0.113464	0	0	0	0	0	0	0	0.0248509	0	0	0	0
Chloroflexi	Chloroflexi (class)	Chloroflexales	Oscillochloridaceae	Oscillochloris	0	0.00217989	0.119539	0.39783	0	0	0	0	0	0	0	0	0	0	0	0	0	0	0	0	0	0	0	0	0	0	0.00597693	0.0240645	0	0	0	0	0	0	0	0	0	0	0	0	0	0	0	0	0.0244559
Thermotogae	Thermotogae (class)	Thermotogales	Thermotogaceae	Thermotoga	0.00093402	0.00723981	0.119757	0.396457	0	0	0	0	0	0	0	0.0061237	0	0	0.0134907	0	0	0	0	0	0	0	0	0	0	0	0.0119539	0.048129	0	0	0.0452694	0	0.075643	0	0	0	0	0	0	0	0	0	0	0	0
Cyanobacteria	unclassified (derived from Cyanobacteria)	Oscillatoriales	unclassified (derived from Oscillatoriales)	Trichodesmium	0.0127619	0.00170884	0.121733	0.400892	0	0.0254453	0	0	0	0	0	0.0122474	0.0398248	0.0275084	0.0269815	0	0	0.135993	0	0	0	0	0	0	0	0	0	0	0.0349732	0.00774773	0	0	0	0	0	0	0	0	0	0	0	0	0	0	0
Proteobacteria	Alphaproteobacteria	Sphingomonadales	Sphingomonadaceae	Novosphingobium	0.000327481	0.0234837	0.121987	0.399634	0	0	0	0	0	0	0	0	0	0.00687711	0	0	0	0	0	0	0	0	0	0	0	0	0.00597693	0.0721935	0.0816041	0.0387387	0	0	0	0	0	0	0	0	0.0361576	0	0	0	0	0	0
Proteobacteria	Gammaproteobacteria	Pseudomonadales	Moraxellaceae	Enhydrobacter	0.000807787	0.616238	0.12273	0.399985	0	0.0169635	0	0	0	0	0	0	0	0	0	0	0	0	0	0	0	0	0	0	0	0.447823	0.0358616	1.38371	0.0699464	9.63818	0.497963	0.0321027	0	0	0	0	0	0.0726744	0.0120525	0	0.0124254	1.1194	0.251046	0	0.0978234
Proteobacteria	Gammaproteobacteria	unclassified (derived from Gammaproteobacteria)	unclassified (derived from Gammaproteobacteria)	Reinekea	0.00164848	0.0263521	0.123357	0.399956	0	0.00848176	0	0	0	0	0.0112943	0	0.00796495	0.00687711	0	0	0	0	0	0	0	0	0	0	0	0.0104145	0.0239077	0	0	0.00774773	0	0	0	0	0	0	0	0	0	0	0	0.373134	0	0	0.0978234
Actinobacteria	Actinobacteria (class)	Actinomycetales	Cellulomonadaceae	Cellulomonas	0.0106056	0.0366516	0.123383	0.397988	0	0	0	0	0	0	0	0	0	0	0	0	0	0	0	0	0	0	0	0.222717	0	0.145803	0.0896539	0.168451	0.163208	0.0232432	0	0.192616	0.075643	0	0	0	0	0	0	0	0	0	0	0	0
Proteobacteria	Gammaproteobacteria	Pseudomonadales	Moraxellaceae	Moraxella	0.00807787	0.0549528	0.123701	0.39698	0	0.169635	0	0	0	0	0	0	0	0	0	0	0	0	0	0	0	0	0	0	0	0.187461	0.0119539	0.204548	0.0116577	0.681801	0.0905387	0.0321027	0	0.0087535	0	0	0	0	0.0241051	0	0	0	0	0	0.0244559
Proteobacteria	Deltaproteobacteria	Desulfarculales	Desulfarculaceae	Desulfarculus	0.000327481	0.00191003	0.123861	0.395476	0	0	0	0	0	0	0	0	0	0.00687711	0	0	0	0	0	0	0	0	0	0	0	0.0104145	0.0179308	0	0.0116577	0.00774773	0	0	0	0	0	0	0	0	0	0	0	0	0	0	0
Actinobacteria	Actinobacteria (class)	Actinomycetales	Thermomonosporaceae	Thermomonospora	0.00082943	0.00837653	0.124889	0.396742	0	0	0	0	0	0	0.0112943	0.0061237	0	0	0	0	0	0	0	0	0	0	0	0	0	0.020829	0.0119539	0	0.0233155	0.00774773	0	0.0321027	0.113464	0	0	0	0	0	0	0	0	0	0	0	0
Proteobacteria	Gammaproteobacteria	Oceanospirillales	Halomonadaceae	Halomonas	0.00118024	0.0442196	0.12504	0.395228	0	0	0	0	0	0	0.0112943	0	0	0	0.0134907	0	0	0	0	0	0	0	0	0	0	0.0312435	0	0.0360967	0	0.0387387	0	0	0	0.0087535	0	0	0.389105	0	0	0	0.0248509	0	0	0	0
Actinobacteria	Actinobacteria (class)	Bifidobacteriales	Bifidobacteriaceae	Parascardovia	0.000654962	0.00601344	0.125179	0.393687	0	0	0	0	0	0	0	0	0	0.0137542	0	0	0	0	0	0	0	0	0	0	0	0	0.0179308	0.0240645	0.0349732	0	0	0	0	0	0	0	0	0	0	0	0	0	0	0	0.0733676
Proteobacteria	Gammaproteobacteria	Oceanospirillales	Oceanospirillaceae	Marinomonas	0.00374088	0.028128	0.12641	0.39558	0	0	0	0	0	0	0.00564717	0	0.00796495	0	0	0	0	0.0453309	0	0	0.0196155	0	0	0	0	0.020829	0.0298846	0.0360967	0	0.0852251	0	0.0321027	0.0378215	0	0	0	0	0	0	0	0	0.373134	0	0	0
Firmicutes	Clostridia	Clostridiales	Lachnospiraceae	unclassified (derived from Lachnospiraceae)	0.00195445	0.0104413	0.127283	0.396343	0	0	0	0	0	0.0280426	0	0.0061237	0	0.00687711	0	0	0	0	0	0	0	0	0	0	0	0.020829	0.00597693	0.0240645	0.0233155	0	0.0905387	0.0963082	0	0	0	0	0	0	0	0	0	0	0	0	0
Proteobacteria	Gammaproteobacteria	Chromatiales	Halothiobacillaceae	Halothiobacillus	0.000619086	0.00365898	0.127694	0.395663	0	0	0	0	0	0	0	0.0061237	0	0.00687711	0	0	0	0	0	0	0	0	0	0	0	0	0.0179308	0.0240645	0.0116577	0	0	0	0.0378215	0	0	0	0	0	0	0	0	0	0	0	0
Proteobacteria	Alphaproteobacteria	Rhodobacterales	Hyphomonadaceae	Hirschia	0	0.00356455	0.129613	0.399639	0	0	0	0	0	0	0	0	0	0	0	0	0	0	0	0	0	0	0	0	0	0	0	0.0360967	0	0.00774773	0.0452694	0	0	0	0	0	0	0	0	0	0	0	0	0	0
Proteobacteria	Alphaproteobacteria	Rhodobacterales	Rhodobacteraceae	Ruegeria	0.00233429	0.0217383	0.130584	0.400669	0	0	0	0	0	0	0.00564717	0.0061237	0	0.00687711	0	0	0	0	0	0	0	0	0.0303721	0	0	0.156217	0	0	0.0116577	0.0154955	0.0905387	0	0	0	0	0	0	0	0	0	0	0	0.00523013	0	0
Proteobacteria	Gammaproteobacteria	Oceanospirillales	Oceanospirillaceae	Bermanella	0	0.00315708	0.13121	0.400635	0	0	0	0	0	0	0	0	0	0	0	0	0	0	0	0	0	0	0	0	0	0.0104145	0	0	0	0.0232432	0.0452694	0	0	0	0	0	0	0	0	0	0	0	0	0	0
Proteobacteria	Gammaproteobacteria	Xanthomonadales	Xanthomonadaceae	Xylella	0.168462	0.0537389	0.133978	0.407111	0	0.0169635	0	0	0	0	0	0	0.00796495	0.00687711	0.00674536	0.255754	0.297619	0	0	0.749064	0.0392311	0	0.136674	0.890869	1.12994	0.062487	0.0717231	0.048129	0	0.108468	0.226347	0.0321027	0	0.122549	0	0.0733317	0	0.0363372	0.168736	0	0.0248509	0	0.0732218	0	0
Bacteroidetes	Flavobacteriia	Flavobacteriales	Flavobacteriaceae	Kordia	0.00288752	0	0.134079	0.40546	0	0	0	0	0	0	0.033883	0.0061237	0	0.0206313	0	0	0	0	0	0	0	0	0	0	0	0	0	0	0	0	0	0	0	0	0	0	0	0	0	0	0	0	0	0	0
Proteobacteria	Betaproteobacteria	Burkholderiales	Oxalobacteraceae	Herminiimonas	0.0126829	0.0373126	0.135316	0.407244	0	0	0	0	0	0	0.00564717	0	0	0	0	0	0	0	0	0	0.0784621	0	0.182232	0	0	0.041658	0.0777001	0.0360967	0.0116577	0.123964	0.181077	0	0	0.245098	0	0.0244439	0	0.145349	0	0	0.0248509	0	0.0209205	0	0
Proteobacteria	Gammaproteobacteria	Vibrionales	Vibrionaceae	Vibrio	0.387642	0.75214	0.13665	0.409301	0	0.0678541	0	0	0	0	0.0451773	0.0306185	0.0238949	0.0206313	0.10118	1.27877	1.4881	0.317316	0	0.749064	0	3.4965	0.0759301	0.445434	0	0.614455	0.1554	0.445193	0.326416	0.728287	1.67497	0.385233	0.75643	0.0437675	0.204082	0.0977756	1.16732	0.399709	0.216946	0.629723	0.0124254	1.86567	0.502092	0.726392	0.317926
Bacteroidetes	Bacteroidia	Bacteroidales	unclassified (derived from Bacteroidales)	Candidatus Azobacteroides	0.000268913	0.00247079	0.137471	0.409808	0	0	0	0	0	0	0.00564717	0	0	0	0	0	0	0	0	0	0	0	0	0	0	0	0.00597693	0.0120322	0.0116577	0	0	0.0321027	0	0	0	0	0	0	0	0	0	0	0	0	0
Fibrobacteres	Fibrobacteria	Fibrobacterales	Fibrobacteraceae	Fibrobacter	0.00293013	0.0334464	0.139952	0.415236	0	0	0	0	0	0.0280426	0.00564717	0.0061237	0.00796495	0.0137542	0	0	0	0	0	0	0	0	0	0	0	0.020829	0	0.0240645	0.0349732	0.0232432	0.497963	0	0	0	0	0	0	0.0363372	0	0	0.0372763	0	0	0	0.0733676
Proteobacteria	Gammaproteobacteria	Xanthomonadales	Xanthomonadaceae	Xanthomonas	0.594115	0.17056	0.140114	0.413763	0	0.00848176	0	0	0	0	0.033883	0.0061237	0	0.0137542	0.0337268	1.02302	2.38095	0	0	1.49813	0.17654	0	0.212604	2.00445	5.08475	0.135388	0.262985	0.096258	0.233155	0.371891	0.362155	0.0642055	0.075643	0.192577	0.136054	0.146663	0	0.0726744	0.0843678	0.125945	0.0497018	0.746269	0.177824	0	0.0489117
Spirochaetes	Spirochaetia	Spirochaetales	Spirochaetaceae	Spirochaeta	0.00133536	0.0082451	0.140994	0.414418	0	0	0	0	0	0.0280426	0	0	0	0	0	0	0	0	0	0	0	0	0	0	0	0.020829	0	0.048129	0.0466309	0	0.0905387	0	0	0	0	0	0	0	0	0	0	0	0	0	0
Proteobacteria	Gammaproteobacteria	Alteromonadales	unclassified (derived from Alteromonadales)	Teredinibacter	0.000268913	0.00300504	0.14192	0.415199	0	0	0	0	0	0	0.00564717	0	0	0	0	0	0	0	0	0	0	0	0	0	0	0	0	0.0120322	0	0.0309909	0	0.0321027	0	0	0	0	0	0	0	0	0	0	0	0	0
Actinobacteria	Actinobacteria (class)	unclassified (derived from Actinobacteria (class))	unclassified (derived from Actinobacteria (class))	unclassified (derived from Actinobacteria (class))	0.000379284	0.0457987	0.142943	0.416257	0	0	0	0	0	0	0	0	0.00796495	0	0	0	0	0	0	0	0	0	0	0	0	0.0520725	0	0.0360967	0.139893	0	0	0.0963082	0.0378215	0	0	0	0	0	0.0120525	0	0	0.746269	0	0	0.0244559
Chloroflexi	Thermomicrobia (class)	Thermomicrobiales	Thermomicrobiaceae	Thermomicrobium	0	0.0014816	0.146361	0.424246	0	0	0	0	0	0	0	0	0	0	0	0	0	0	0	0	0	0	0	0	0	0	0.00597693	0	0.0233155	0.00774773	0	0	0	0	0	0	0	0	0	0	0	0	0	0	0
Proteobacteria	Betaproteobacteria	unclassified (derived from Betaproteobacteria)	unclassified (derived from Betaproteobacteria)	Candidatus Accumulibacter	0.00230591	0.0110557	0.148024	0.427098	0	0	0	0	0	0	0	0	0	0.00687711	0.00674536	0	0	0	0	0	0.0196155	0	0.015186	0	0	0.0312435	0.0119539	0	0	0.0619819	0.0452694	0	0	0	0	0	0	0	0	0.125945	0	0	0	0	0
Proteobacteria	Gammaproteobacteria	Legionellales	Coxiellaceae	Coxiella	0.00212059	0.00593983	0.151933	0.436373	0	0	0	0	0	0	0.0112943	0	0	0.00687711	0.00674536	0	0	0	0	0	0.0196155	0	0	0	0	0.0104145	0.0119539	0	0.0116577	0.00774773	0.0452694	0	0.0378215	0.0087535	0	0	0	0	0	0	0	0	0	0	0
Firmicutes	Clostridia	Thermoanaerobacterales	Thermoanaerobacteraceae	Caldanaerobacter	0.00107565	0.00522954	0.153813	0.439766	0	0	0	0	0	0	0.0225887	0	0	0	0	0	0	0	0	0	0	0	0	0	0	0.020829	0.00597693	0.0120322	0.0466309	0	0.0452694	0	0	0	0	0	0	0	0	0	0	0	0	0	0
Proteobacteria	Gammaproteobacteria	Enterobacteriales	Enterobacteriaceae	Citrobacter	1.12179	0.261193	0.155331	0.442095	0	0.271416	0	0	0.0272554	0	0.372713	0.251072	0.509757	0.30947	7.86509	0	0.892857	0.951949	0.398406	1.49813	0.156924	0	0.0303721	10.0223	0	0.270777	0.0956309	0.132355	0.291443	0.255675	0.543232	0.0963082	0.378215	0.0262605	0.0340136	0.0977756	0.389105	0.327035	0.0602627	0.125945	0.0248509	1.86567	0.177824	0	0.122279
Firmicutes	Bacilli	Lactobacillales	Enterococcaceae	Tetragenococcus	0.00695246	0.00097912	0.155731	0.441237	0	0.00848176	0	0	0.0817661	0.0280426	0	0.0061237	0.00796495	0.00687711	0.00674536	0	0	0	0	0	0	0	0	0	0	0	0	0	0	0	0	0	0	0	0	0	0	0	0.0120525	0	0.0124254	0	0	0	0
Proteobacteria	Gammaproteobacteria	Alteromonadales	Pseudoalteromonadaceae	Pseudoalteromonas	0.00367457	0.0105514	0.159405	0.449623	0	0.00848176	0	0	0	0	0.0282358	0.0122474	0.00796495	0	0.0202361	0	0	0	0	0	0	0	0	0	0	0.0312435	0.0179308	0.0120322	0.0582886	0.0929728	0	0.0321027	0	0.0087535	0	0	0	0	0	0	0	0	0.0104603	0	0
Cyanobacteria	unclassified (derived from Cyanobacteria)	Prochlorales	Prochlorococcaceae	Prochlorococcus	0.000560517	0.00245603	0.159963	0.44918	0	0	0	0	0	0	0.00564717	0.0061237	0	0	0	0	0	0	0	0	0	0	0	0	0	0	0.0179308	0.0240645	0.0116577	0.00774773	0	0	0	0	0	0	0	0	0	0	0	0	0	0	0
Proteobacteria	Alphaproteobacteria	Rhodobacterales	Rhodobacteraceae	Oceanibulbus	0	0.000947599	0.161547	0.451612	0	0	0	0	0	0	0	0	0	0	0	0	0	0	0	0	0	0	0	0	0	0	0	0.0120322	0.0116577	0	0	0	0	0	0	0	0	0	0	0	0	0	0	0	0
Proteobacteria	Gammaproteobacteria	unclassified (derived from Gammaproteobacteria)	unclassified (derived from Gammaproteobacteria)	Endoriftia	0.000619086	0	0.163039	0.453768	0	0	0	0	0	0	0	0.0061237	0	0.00687711	0	0	0	0	0	0	0	0	0	0	0	0	0	0	0	0	0	0	0	0	0	0	0	0	0	0	0	0	0	0	0
Chlorobi	Chlorobia	Chlorobiales	Chlorobiaceae	Chlorobium	0.00764271	0.0173806	0.166152	0.460394	0	0	0	0	0	0	0.0508245	0	0.00796495	0.0275084	0.074199	0	0	0	0	0	0	0	0	0	0	0.020829	0.0119539	0.0842257	0.0582886	0.0774773	0	0.0321027	0.075643	0	0	0.0244439	0	0	0	0	0.0124254	0	0.00523013	0	0.0244559
Cyanobacteria	unclassified (derived from Cyanobacteria)	Chroococcales	unclassified (derived from Chroococcales)	Thermosynechococcus	0	0.00145298	0.166178	0.458446	0	0	0	0	0	0	0	0	0	0	0	0	0	0	0	0	0	0	0	0	0	0.020829	0	0	0	0.0154955	0	0	0	0	0	0	0	0	0	0	0	0	0	0	0
Firmicutes	Bacilli	Bacillales	Alicyclobacillaceae	Kyrpidia	0	0.000726489	0.166178	0.456444	0	0	0	0	0	0	0	0	0	0	0	0	0	0	0	0	0	0	0	0	0	0.0104145	0	0	0	0.00774773	0	0	0	0	0	0	0	0	0	0	0	0	0	0	0
Proteobacteria	Alphaproteobacteria	unclassified (derived from Alphaproteobacteria)	unclassified (derived from Alphaproteobacteria)	Candidatus Puniceispirillum	0.0608846	0.00139604	0.167217	0.457303	0	0	0	0	0	0	0	0	0	0	0	0	0.595238	0	0	0	0	0	0.015186	0.668151	0	0	0	0	0.0116577	0.0232432	0	0	0	0	0	0	0	0	0	0	0	0	0	0	0
Actinobacteria	Actinobacteria (class)	Coriobacteriales	Coriobacteriaceae	Olsenella	0	0.000714133	0.167519	0.456146	0	0	0	0	0	0	0	0	0	0	0	0	0	0	0	0	0	0	0	0	0	0.0104145	0	0	0	0	0	0	0	0	0	0	0	0	0	0	0	0	0	0	0
Firmicutes	Clostridia	Clostridiales	Ruminococcaceae	Faecalibacterium	0.000619086	0.00591232	0.168712	0.457414	0	0	0	0	0	0	0	0.0061237	0	0.00687711	0	0	0	0	0	0	0	0	0	0	0	0.0104145	0.0119539	0	0.0116577	0.0232432	0.0905387	0	0	0	0	0	0	0	0	0	0	0	0	0	0
Proteobacteria	Alphaproteobacteria	Rhodobacterales	Rhodobacteraceae	Ketogulonicigenium	0.000268913	0.00187814	0.168737	0.455516	0	0	0	0	0	0	0.00564717	0	0	0	0	0	0	0	0	0	0	0	0	0	0	0	0	0	0.0116577	0.0232432	0	0	0	0	0	0	0	0	0.0120525	0	0	0	0	0	0
Firmicutes	Bacilli	Lactobacillales	Carnobacteriaceae	Carnobacterium	0.0817199	0.0164398	0.169072	0.454472	0	0	0	0	0.436086	0.673023	0.00564717	0.0061237	0	0	0	0	0.595238	0	0	0	0	0	0	0	0	0.0520725	0.0119539	0.0240645	0.0466309	0.0309909	0.181077	0.0642055	0	0	0	0	0	0	0	0	0	0	0	0	0
Firmicutes	Clostridia	Clostridiales	Peptostreptococcaceae	Filifactor	0	0.000519114	0.169635	0.454044	0	0	0	0	0	0	0	0	0	0	0	0	0	0	0	0	0	0	0	0	0	0	0	0	0	0.00774773	0	0	0	0	0	0	0	0	0	0	0	0	0.00523013	0	0
Aquificae	Aquificae (class)	Aquificales	Aquificaceae	Aquifex	0	0.000776219	0.170269	0.453811	0	0	0	0	0	0	0	0	0	0	0	0	0	0	0	0	0	0	0	0	0	0	0	0	0.0116577	0.00774773	0	0	0	0	0	0	0	0	0	0	0	0	0	0	0
Proteobacteria	Gammaproteobacteria	Alteromonadales	Colwelliaceae	Colwellia	0.039503	0.0035333	0.17115	0.454235	0	0	0	0	0	0	0.0112943	0	0	0	0	0	0	0.0453309	0.398406	0.374532	0	0	0	0	0	0.0104145	0.0119539	0	0.0349732	0.0309909	0	0	0	0	0	0	0	0	0	0	0	0	0	0	0
Proteobacteria	Alphaproteobacteria	Rhizobiales	Bradyrhizobiaceae	Bradyrhizobium	0.0339362	0.0822919	0.171479	0.453196	0	0	0	0	0	0.0280426	0.0225887	0.0061237	0.00796495	0	0	0	0	0	0	0	0.313849	0	0.334093	0	0	0.218704	0.280916	0.324871	0.25647	0.193693	0	0.0642055	0	0	0	0	0	0.0363372	0	0.125945	0	0	0.00523013	0	0.0244559
Fusobacteria	Fusobacteriia	Fusobacteriales	Leptotrichiaceae	Leptotrichia	0.0104112	0.00359944	0.180349	0.474642	0	0.0169635	0	0	0.0545108	0.0841279	0.0112943	0.0244948	0	0.0137542	0.0134907	0	0	0	0	0	0	0	0	0	0	0.0104145	0	0.0240645	0.0233155	0.00774773	0	0	0	0	0	0.0244439	0	0	0	0	0	0	0	0	0
Proteobacteria	Epsilonproteobacteria	unclassified (derived from Epsilonproteobacteria)	unclassified (derived from Epsilonproteobacteria)	Nitratiruptor	0.00152027	0	0.180744	0.473699	0	0	0	0	0	0	0.0112943	0	0	0.0206313	0	0	0	0	0	0	0	0	0	0	0	0	0	0	0	0	0	0	0	0	0	0	0	0	0	0	0	0	0	0	0
Firmicutes	Bacilli	Lactobacillales	Streptococcaceae	Lactococcus	0.41056	0.245778	0.181192	0.472905	0	0.330789	0	0	0.463342	1.20583	0.169415	0.214329	0.270808	0.26133	0.141653	0.767263	0.595238	0	0	1.87266	0.0392311	0.699301	0.015186	0.445434	1.12994	0.187461	0.137469	0.204548	0.221497	0.216937	1.13173	0.513644	0.340393	0.0087535	0	0.0244439	0.389105	0.0726744	0.0241051	0.251889	0.111829	0.373134	0.041841	0.726392	0.0733676
Deinococcus-Thermus	Deinococci	Deinococcales	Deinococcaceae	Deinococcus	0.000806738	0.0720659	0.182207	0.473586	0	0	0	0	0	0	0.0169415	0	0	0	0	0	0	0	0	0	0	0	0	0	0	0.0104145	0.0179308	1.29948	0.116577	0.0464864	0.0452694	0	0.075643	0	0	0	0	0	0	0	0	0	0	0	0
Chloroflexi	Chloroflexi (class)	Chloroflexales	Chloroflexaceae	Roseiflexus	0.0023372	0.00842388	0.183253	0.474346	0	0	0	0	0	0	0.0225887	0	0	0.00687711	0	0	0	0	0	0	0.0196155	0	0	0	0	0.062487	0.00597693	0.0842257	0.0349732	0.0154955	0	0	0	0	0	0	0	0	0	0	0	0	0	0	0
Proteobacteria	Gammaproteobacteria	Cardiobacteriales	Cardiobacteriaceae	Cardiobacterium	0.0112184	0.0391515	0.184368	0.475277	0	0	0	0	0	0	0	0.0061237	0	0	0.00674536	0	0	0	0	0	0	0	0	0.222717	0	0.0729015	0.0239077	0.0721935	0.0466309	0.100721	0.226347	0.0321027	0	0	0	0	0.389105	0	0	0	0	0	0	0	0
Firmicutes	Clostridia	Clostridiales	Lachnospiraceae	Catonella	0.0051709	0.0176077	0.184556	0.473819	0	0	0	0	0.0272554	0.0560852	0	0.0183711	0	0.00687711	0	0	0	0	0	0	0	0	0	0	0	0	0	0.096258	0	0.00774773	0.0905387	0.0642055	0	0	0	0	0	0	0	0	0	0	0.00523013	0	0
Bacteroidetes	Flavobacteriia	Flavobacteriales	Flavobacteriaceae	Riemerella	0.00214465	0.00954301	0.185198	0.473534	0	0.00848176	0	0	0	0	0.0169415	0.0061237	0	0	0.0134907	0	0	0	0	0	0	0	0	0	0	0.020829	0.0119539	0.0240645	0	0.0154955	0	0.128411	0.0378215	0	0	0	0	0	0	0	0	0	0	0	0
Proteobacteria	Epsilonproteobacteria	Campylobacterales	Helicobacteraceae	Wolinella	0	0.000720367	0.185444	0.472243	0	0	0	0	0	0	0	0	0	0	0	0	0	0	0	0	0	0	0	0	0	0	0.00597693	0.0120322	0	0	0	0	0	0	0	0	0	0	0	0	0	0	0	0	0
Proteobacteria	Alphaproteobacteria	Rhodobacterales	Rhodobacteraceae	Citreicella	0	0.00186956	0.18554	0.470584	0	0	0	0	0	0	0	0	0	0	0	0	0	0	0	0	0	0	0	0	0	0.0312435	0	0	0	0.0154955	0	0	0	0	0	0	0	0	0	0	0	0	0	0	0
Firmicutes	Clostridia	Clostridiales	Clostridiales Family XVIII. Incertae Sedis	Symbiobacterium	0.00123817	0.00450292	0.185686	0.469063	0	0	0	0	0	0	0	0.0122474	0	0.0137542	0	0	0	0	0	0	0	0	0	0	0	0	0	0	0.0116577	0.0309909	0	0.0321027	0.0378215	0	0	0	0	0	0	0	0	0	0	0	0
Proteobacteria	Gammaproteobacteria	Oceanospirillales	Oceanospirillaceae	Neptuniibacter	0	0.00970439	0.186959	0.470389	0	0	0	0	0	0	0	0	0	0	0	0	0	0	0	0	0	0	0	0	0	0.020829	0	0	0	0.00774773	0	0	0.0378215	0	0	0	0	0	0	0	0	0	0	0	0
Actinobacteria	Actinobacteria (class)	Coriobacteriales	Coriobacteriaceae	Cryptobacterium	0	0.00142889	0.186993	0.4686	0	0	0	0	0	0	0	0	0	0	0	0	0	0	0	0	0	0	0	0	0	0	0	0.0240645	0.0116577	0	0	0	0	0	0	0	0	0	0	0	0	0	0	0	0
Cyanobacteria	unclassified (derived from Cyanobacteria)	Oscillatoriales	unclassified (derived from Oscillatoriales)	Arthrospira	0	0.00142889	0.186993	0.466741	0	0	0	0	0	0	0	0	0	0	0	0	0	0	0	0	0	0	0	0	0	0	0	0.0240645	0.0116577	0	0	0	0	0	0	0	0	0	0	0	0	0	0	0	0
Deinococcus-Thermus	Deinococci	Deinococcales	Trueperaceae	Truepera	0	0.00142889	0.186993	0.464896	0	0	0	0	0	0	0	0	0	0	0	0	0	0	0	0	0	0	0	0	0	0	0	0.0240645	0.0116577	0	0	0	0	0	0	0	0	0	0	0	0	0	0	0	0
Proteobacteria	Alphaproteobacteria	Rhodobacterales	Rhodobacteraceae	Maritimibacter	0	0.00587464	0.187818	0.465108	0	0	0	0	0	0	0	0	0	0	0	0	0	0	0	0	0	0	0	0	0	0.104145	0	0	0.0349732	0.00774773	0	0	0	0	0	0	0	0	0	0	0	0	0	0	0
Actinobacteria	Actinobacteria (class)	Actinomycetales	unclassified (derived from Actinomycetales)	Tropheryma	0	0.00144454	0.188005	0.463746	0	0	0	0	0	0	0	0	0	0	0	0	0	0	0	0	0	0	0	0	0	0	0	0	0.0116577	0	0	0	0	0	0	0	0	0	0	0	0	0	0	0	0.0244559
Bacteroidetes	Cytophagia	Cytophagales	Cytophagaceae	Cytophaga	0.0346844	0.0107548	0.18849	0.463126	0	0	0	0	0	0	0.220239	0.0918555	0.0159299	0.123788	0.27656	0	0	0	0	0	0	0	0	0	0	0.0312435	0.0179308	0.0601612	0.0233155	0.0232432	0	0.0321027	0.075643	0	0	0	0	0	0	0	0	0	0.00523013	0	0
Proteobacteria	Alphaproteobacteria	Rhodobacterales	Rhodobacteraceae	Loktanella	0	0.00264393	0.190264	0.465666	0	0	0	0	0	0	0	0	0	0	0	0	0	0	0	0	0	0	0	0	0	0.020829	0	0	0	0	0.0452694	0	0	0	0	0	0	0	0	0	0	0	0	0	0
Proteobacteria	Betaproteobacteria	Burkholderiales	Burkholderiaceae	Lautropia	0	0.00934673	0.191569	0.467043	0	0	0	0	0	0	0	0	0	0	0	0	0	0	0	0	0	0	0	0	0	0	0.00597693	0.0120322	0.0116577	0.0309909	0	0	0	0	0	0	0	0	0	0	0	0	0	0	0
Proteobacteria	Alphaproteobacteria	Rhizobiales	Xanthobacteraceae	Xanthobacter	0.00385226	0.0101559	0.192125	0.46659	0	0	0	0	0	0	0.0112943	0	0	0	0	0	0	0	0	0	0.0392311	0	0.0303721	0	0	0.0729015	0.0418385	0.0240645	0.0116577	0.0619819	0	0	0	0	0.0340136	0	0	0	0	0	0	0	0	0	0
Actinobacteria	Actinobacteria (class)	Bifidobacteriales	Bifidobacteriaceae	Bifidobacterium	0.0122427	4.98657	0.194558	0.47068	0	0.0169635	0	0	0.0545108	0	0.0225887	0.0306185	0.00796495	0.0137542	0.0607083	0	0	0	0	0	0.0196155	0	0.0303721	0	0	0.281191	0.173331	0.348935	0.629517	0.0697296	0.0905387	0.385233	0.340393	0.0262605	0.102041	0.342215	0	2.07122	0.144631	1.25945	0.931909	4.10448	11.3023	0.726392	0.807043
Firmicutes	Bacilli	Bacillales	Paenibacillaceae	Paenibacillus	0.0777788	0.0254977	0.194895	0.46969	0	0.0932994	0	0	0.0545108	0.11217	0.101649	0.0122474	0.0238949	0.0137542	0.0269815	0.511509	0	0	0	0	0	0	0.015186	0.668151	0	0.020829	0.0478154	0.0601612	0.10492	0.0852251	0.0905387	0.0642055	0.075643	0	0	0	0	0	0	0	0	0	0	0	0
Firmicutes	Clostridia	Clostridiales	Ruminococcaceae	Acetivibrio	0.000291605	0.00218279	0.195575	0.469529	0	0	0	0	0	0	0	0.0061237	0	0	0	0	0	0	0	0	0	0	0	0	0	0.0104145	0	0	0	0	0	0.0321027	0	0	0	0	0	0	0.0120525	0	0	0	0	0	0
Chlamydiae	Chlamydiia	Chlamydiales	Chlamydiaceae	Chlamydia	0.00155311	0.000309909	0.196755	0.470567	0	0	0	0	0	0	0	0.0122474	0	0.00687711	0.0134907	0	0	0	0	0	0	0	0	0	0	0	0	0	0	0.00774773	0	0	0	0	0	0	0	0	0	0	0	0	0	0	0
Proteobacteria	Deltaproteobacteria	unclassified (derived from Deltaproteobacteria)	unclassified (derived from Deltaproteobacteria)	unclassified (derived from Deltaproteobacteria)	0.000291605	0.00173955	0.201135	0.479219	0	0	0	0	0	0	0	0.0061237	0	0	0	0	0	0	0	0	0	0	0	0	0	0	0	0	0.0233155	0.00774773	0	0	0	0	0	0	0	0	0	0	0.0124254	0	0	0	0
Proteobacteria	Betaproteobacteria	Burkholderiales	Burkholderiaceae	Limnobacter	0	0.00171779	0.202146	0.479811	0	0	0	0	0	0	0	0	0	0	0	0	0	0	0	0	0	0	0	0	0	0	0.0119539	0	0	0.0309909	0	0	0	0	0	0	0	0	0	0	0	0	0	0	0
Proteobacteria	Gammaproteobacteria	Alteromonadales	Alteromonadaceae	Saccharophagus	0.00156679	0.00462409	0.203583	0.481405	0	0	0	0	0.0272554	0	0.00564717	0	0	0	0	0	0	0	0	0	0	0	0	0	0	0.0104145	0.00597693	0.0240645	0	0.0309909	0	0.0321027	0	0	0	0	0	0	0.0120525	0	0	0	0	0	0
Firmicutes	Clostridia	Halanaerobiales	Halobacteroidaceae	Acetohalobium	0	0.0035308	0.20415	0.480937	0	0	0	0	0	0	0	0	0	0	0	0	0	0	0	0	0	0	0	0	0	0	0	0.0240645	0	0	0	0.0642055	0	0	0	0	0	0	0	0	0	0	0	0	0
Proteobacteria	Gammaproteobacteria	Thiotrichales	Francisellaceae	Francisella	0.0275556	0.00475294	0.204247	0.479371	0	0	0	0	0	0	0	0.0061237	0	0.00687711	0	0	0.297619	0.0453309	0	0	0	0	0	0.222717	0	0.020829	0	0	0.0116577	0.0542341	0	0.0321027	0	0	0	0	0	0	0	0	0	0	0	0	0
Proteobacteria	Gammaproteobacteria	Enterobacteriales	Enterobacteriaceae	Photorhabdus	0.161384	0.021542	0.204525	0.47824	0	0.0424088	0	0	0	0	0.0282358	0.0489896	0.0318598	0.0343855	0.0337268	0	0	2.22121	0.398406	0	0.0588466	0	0.0455581	0.445434	0	0.0520725	0.0298846	0.0240645	0.0116577	0.0697296	0.0905387	0.0321027	0.113464	0	0	0	0	0	0.0120525	0	0	0	0	0	0
Proteobacteria	Alphaproteobacteria	Rhodobacterales	Rhodobacteraceae	Oceanicola	0.000934073	0.0104451	0.20459	0.476619	0	0	0	0	0	0	0	0	0	0	0	0	0	0	0	0	0.0196155	0	0	0	0	0.177046	0	0	0.0233155	0.0154955	0.0452694	0	0	0	0	0	0	0	0	0	0	0	0	0	0
Proteobacteria	Betaproteobacteria	Burkholderiales	Alcaligenaceae	Alcaligenes	0	0.00467096	0.205066	0.475966	0	0	0	0	0	0	0	0	0	0	0	0	0	0	0	0	0	0	0	0	0	0	0	0	0	0.00774773	0	0	0	0	0	0	0	0	0	0	0	0	0.0209205	0	0
Tenericutes	Mollicutes	Entomoplasmatales	Entomoplasmataceae	Mesoplasma	0.0012023	0	0.205449	0.4751	0	0	0	0	0	0	0	0.0183711	0	0.00687711	0	0	0	0	0	0	0	0	0	0	0	0	0	0	0	0	0	0	0	0	0	0	0	0	0	0	0	0	0	0	0
Proteobacteria	Alphaproteobacteria	Rhodobacterales	Rhodobacteraceae	Pelagibaca	0	0.00218543	0.206943	0.476802	0	0	0	0	0	0	0	0	0	0	0	0	0	0	0	0	0	0	0	0	0	0.041658	0	0	0	0.00774773	0	0	0	0	0	0	0	0	0	0	0	0	0.00523013	0	0
Proteobacteria	Alphaproteobacteria	Sphingomonadales	Erythrobacteraceae	Erythrobacter	0.00297617	0.0261507	0.207498	0.476337	0	0	0	0	0	0	0.0169415	0	0	0	0	0	0	0	0	0	0	0	0.0455581	0	0	0	0.0179308	0.0240645	0.0932618	0.0387387	0	0	0	0	0.0340136	0	0	0	0	0	0	0	0.00523013	0	0
Proteobacteria	Alphaproteobacteria	Rhodobacterales	Rhodobacteraceae	Jannaschia	0.000723144	0.00560972	0.209627	0.479474	0	0	0	0	0	0	0	0	0	0	0	0	0	0	0	0	0	0	0.015186	0	0	0.083316	0	0	0.0116577	0	0.0452694	0	0	0	0	0	0	0	0	0	0	0	0	0	0
Proteobacteria	Alphaproteobacteria	Rhodobacterales	Rhodobacteraceae	Sagittula	0.000268913	0.0011928	0.209658	0.477808	0	0	0	0	0	0	0.00564717	0	0	0	0	0	0	0	0	0	0	0	0	0	0	0.0104145	0	0	0.0116577	0.00774773	0	0	0	0	0	0	0	0	0	0	0	0	0	0	0
Proteobacteria	Betaproteobacteria	Burkholderiales	Alcaligenaceae	Achromobacter	0.0175577	0.0352537	0.210423	0.47782	0	0.00848176	0	0	0.0272554	0	0	0	0.00796495	0	0.0269815	0	0	0	0	0	0.17654	0	0.121488	0	0	0.041658	0.113562	0.0240645	0.0582886	0.0774773	0.0905387	0	0.113464	0	0	0.0244439	0	0	0	0	0	0	0.0104603	0	0.0489117
Proteobacteria	Alphaproteobacteria	Rhizobiales	Brucellaceae	Brucella	0.00272016	0.0747407	0.211393	0.478297	0	0	0	0	0	0	0.00564717	0.0244948	0	0	0.0269815	0	0	0	0	0	0	0	0	0	0	0.0937305	0.0418385	0.0360967	0.0699464	0.116216	0.0905387	0	0	0	0	0	0	0	0	0	0	0	0.0104603	0	0
Cyanobacteria	unclassified (derived from Cyanobacteria)	Chroococcales	unclassified (derived from Chroococcales)	Crocosphaera	0.00125528	0	0.211482	0.476782	0	0	0	0	0	0	0	0	0	0	0.00674536	0	0	0	0	0	0.0196155	0	0	0	0	0	0	0	0	0	0	0	0	0	0	0	0	0	0	0	0	0	0	0	0
Fusobacteria	Fusobacteriia	Fusobacteriales	Leptotrichiaceae	Streptobacillus	0	0.00127249	0.214888	0.482731	0	0	0	0	0	0	0	0	0	0	0	0	0	0	0	0	0	0	0	0	0	0	0	0.0240645	0	0.00774773	0	0	0	0	0	0	0	0	0	0	0	0	0	0	0
Bacteroidetes	Cytophagia	Cytophagales	Cytophagaceae	Dyadobacter	0.0325729	0.0083407	0.216247	0.484055	0	0.0763359	0	0	0	0	0.384007	0.0489896	0.0318598	0.061894	0.0809444	0	0	0	0	0	0	0	0	0	0	0.020829	0.0298846	0.0120322	0	0	0	0.0642055	0	0	0	0	0	0	0	0	0	0	0	0	0
Proteobacteria	Alphaproteobacteria	Rhodospirillales	Acetobacteraceae	Gluconacetobacter	0.000723144	0.00252686	0.219521	0.48964	0	0	0	0	0	0	0	0	0	0	0	0	0	0	0	0	0	0	0.015186	0	0	0	0.0119539	0.0240645	0.0116577	0.0154955	0	0	0	0	0	0	0	0	0	0	0	0	0	0	0
Planctomycetes	Planctomycetia	Planctomycetales	Planctomycetaceae	Blastopirellula	0.000917602	0.0135247	0.221697	0.492747	0	0	0	0	0	0	0.00564717	0	0	0.00687711	0.00674536	0	0	0	0	0	0	0	0	0	0	0	0	0.0120322	0.0116577	0.0697296	0	0	0	0	0	0	0	0	0	0	0	0	0	0	0
Proteobacteria	Alphaproteobacteria	Rhodobacterales	Rhodobacteraceae	Ahrensia	0	0.00107224	0.223019	0.493941	0	0	0	0	0	0	0	0	0	0	0	0	0	0	0	0	0	0	0	0	0	0.020829	0.00597693	0	0	0	0	0	0	0	0	0	0	0	0	0	0	0	0	0	0
Actinobacteria	Actinobacteria (class)	Coriobacteriales	Coriobacteriaceae	Atopobium	0.00246958	0.0672817	0.223965	0.494294	0	0	0	0	0	0.0280426	0.0169415	0	0	0.00687711	0	0	0	0	0	0	0	0	0	0	0	0.0104145	0.0179308	0.0120322	0.0466309	0	0	0.0321027	0.0378215	0	0	0.0244439	0	0	0	0	0	0	0.0209205	0	0.0244559
Proteobacteria	Alphaproteobacteria	Rhodobacterales	unclassified (derived from Rhodobacterales)	unclassified (derived from Rhodobacterales)	0.00104435	0.00377979	0.226461	0.498057	0	0	0	0	0	0	0	0	0	0	0.00674536	0	0	0	0	0	0	0	0.015186	0	0	0.0104145	0	0	0.0233155	0.0154955	0.0452694	0	0	0	0	0	0	0	0	0	0	0	0	0	0
Proteobacteria	Betaproteobacteria	Neisseriales	Neisseriaceae	Stenoxybacter	0	0.00229288	0.22824	0.50022	0	0	0	0	0	0	0	0	0	0	0	0	0	0	0	0	0	0	0	0	0	0	0	0	0	0	0.0452694	0	0	0	0	0	0	0	0.0120525	0	0	0	0	0	0
Firmicutes	Bacilli	Bacillales	unclassified (derived from Bacillales)	Exiguobacterium	0.0625672	0.0141386	0.228989	0.500119	0	0	0	0	0.0817661	0.0280426	0.67766	0.0122474	0.493827	0.00687711	0.0134907	0	0	0	0	0	0	0	0	0	0	0.0312435	0.0119539	0.0360967	0.0816041	0	0.0905387	0.0642055	0.0378215	0	0	0	0	0	0	0	0	0	0	0	0
Proteobacteria	Epsilonproteobacteria	Campylobacterales	Campylobacteraceae	Sulfurospirillum	0	0.00227708	0.230534	0.50175	0	0	0	0	0	0	0	0	0	0	0	0	0	0	0	0	0	0	0	0	0	0	0	0	0.0116577	0	0.0452694	0	0	0	0	0	0	0	0	0	0	0	0	0	0
Proteobacteria	Gammaproteobacteria	Pseudomonadales	Pseudomonadaceae	Cellvibrio	0.000537825	0.00538369	0.231638	0.502415	0	0	0	0	0	0	0.0112943	0	0	0	0	0	0	0	0	0	0	0	0	0	0	0	0	0	0	0.0464864	0	0	0	0	0	0	0	0	0	0	0	0	0	0	0
Proteobacteria	Betaproteobacteria	Burkholderiales	Comamonadaceae	Albidiferax	0.0108414	0.0240473	0.234431	0.506725	0	0.0169635	0	0	0	0	0	0	0	0	0	0	0	0	0	0	0.0588466	0	0.15186	0	0	0.0520725	0.0717231	0.0120322	0.0699464	0.0774773	0.0452694	0	0.0378215	0	0	0	0	0	0	0	0	0	0	0	0.146735
Proteobacteria	Gammaproteobacteria	Enterobacteriales	Enterobacteriaceae	Enterobacter	0.702359	0.435228	0.2346	0.505354	0	0.262935	0	0	0	0.0280426	0.225887	0.208206	0.318598	0.151296	1.18044	1.53453	0.892857	0.99728	0.796813	1.49813	0.294233	1.3986	0.0455581	3.78619	1.12994	0.749844	0.328731	0.469258	0.36139	0.759278	2.2182	0.481541	0.75643	0.0612745	0	0	0	0.0726744	0.0843678	0.251889	0.0497018	0.373134	0.251046	0.242131	0.269014
Proteobacteria	Deltaproteobacteria	Myxococcales	Nannocystaceae	Plesiocystis	0	0.00159402	0.23494	0.50436	0	0	0	0	0	0	0	0	0	0	0	0	0	0	0	0	0	0	0	0	0	0	0	0	0	0.00774773	0	0.0321027	0	0	0	0	0	0	0	0	0	0	0	0	0
Proteobacteria	Gammaproteobacteria	Aeromonadales	Succinivibrionaceae	Succinatimonas	0.000291605	0.0019746	0.236194	0.505326	0	0	0	0	0	0	0	0.0061237	0	0	0	0	0	0	0	0	0	0	0	0	0	0	0	0.0120322	0	0	0	0.0321027	0	0	0	0	0	0	0	0	0	0	0.00523013	0	0
Actinobacteria	Actinobacteria (class)	Actinomycetales	Actinomycetaceae	Trueperella	0.00165657	0	0.236623	0.504529	0	0	0	0	0	0.0280426	0	0	0	0	0.00674536	0	0	0	0	0	0	0	0	0	0	0	0	0	0	0	0	0	0	0	0	0	0	0	0	0	0	0	0	0	0
Firmicutes	Clostridia	Clostridiales	Syntrophomonadaceae	Syntrophomonas	0.00272791	0.000947599	0.238128	0.506021	0	0.00848176	0	0	0	0	0.0169415	0.0122474	0	0	0	0	0	0	0	0	0.0196155	0	0	0	0	0	0	0.0120322	0.0116577	0	0	0	0	0	0	0	0	0	0	0	0	0	0	0	0
Firmicutes	Clostridia	Clostridiales	Peptococcaceae	Desulfitobacterium	0.00145543	0.00711645	0.239284	0.506765	0	0	0	0	0	0	0.0169415	0	0	0.00687711	0.00674536	0	0	0	0	0	0	0	0	0	0	0.0104145	0.0179308	0	0.0116577	0	0	0	0.113464	0	0	0.0244439	0	0	0	0	0	0	0	0	0
Bacteroidetes	Cytophagia	Cytophagales	Cytophagaceae	Spirosoma	0.0302435	0.00931531	0.241206	0.509122	0	0.00848176	0	0	0	0	0.327536	0.0367422	0.0238949	0.123788	0.114671	0	0	0	0	0	0	0	0	0	0	0.020829	0	0.0120322	0.0116577	0.0542341	0	0.0963082	0.0378215	0	0	0	0	0	0	0	0	0	0	0	0
Bacteroidetes	Flavobacteriia	Flavobacteriales	Flavobacteriaceae	Psychroflexus	0.000327481	0.00244548	0.243505	0.512256	0	0	0	0	0	0	0	0	0	0.00687711	0	0	0	0	0	0	0	0	0	0	0	0	0	0	0.0233155	0	0	0	0.0378215	0	0	0	0	0	0	0	0	0	0	0	0
Planctomycetes	Planctomycetia	Planctomycetales	Planctomycetaceae	Planctomyces	0.000865306	0.0119744	0.246225	0.516251	0	0	0	0	0	0	0.0112943	0	0	0.00687711	0	0	0	0	0	0	0	0	0	0	0	0	0.00597693	0	0	0.232432	0	0	0.0378215	0	0	0	0	0	0	0	0	0	0.0156904	0	0
Firmicutes	Negativicutes	Selenomonadales	Veillonellaceae	Veillonella	0.381975	0.0194441	0.247301	0.516786	0	0	0	0	0	0.0280426	0	0	0.85225	0.00687711	0	0.767263	0	0	0	6.36704	0	0	0	0	0	0.0104145	0	0.0120322	0.0349732	0.0309909	0.0452694	0	0	0	0	0	0	0	0	0	0	0	0	0	0
Proteobacteria	Gammaproteobacteria	Vibrionales	unclassified (derived from Vibrionales)	unclassified (derived from Vibrionales)	0	0.00216091	0.249226	0.519083	0	0	0	0	0	0	0	0	0	0	0	0	0	0	0	0	0	0	0	0	0	0	0	0	0	0	0.0452694	0	0	0.0087535	0	0	0	0	0	0	0	0	0	0	0
Acidobacteria	Acidobacteriia	Acidobacteriales	Acidobacteriaceae	Granulicella	0.00195046	0.000309909	0.249511	0.517961	0	0	0	0	0	0	0.0225887	0.0183711	0	0	0	0	0	0	0	0	0	0	0	0	0	0	0	0	0	0.00774773	0	0	0	0	0	0	0	0	0	0	0	0	0	0	0
Actinobacteria	Actinobacteria (class)	Actinomycetales	Micrococcaceae	Micrococcus	0.0296303	0.0686703	0.250149	0.517578	0	0.00848176	0	0	0	0	0.00564717	0.0061237	0	0	0.00674536	0	0.595238	0	0	0	0	0	0	0	0	0.145803	0.0537924	0.132355	0.209839	0.17045	0.271616	0.0321027	0.151286	0.0087535	0.0340136	0	0	0	0	0	0	0	0.041841	0	0
Proteobacteria	Gammaproteobacteria	Thiotrichales	Piscirickettsiaceae	Thiomicrospira	0.000934073	0.00538658	0.251009	0.517654	0	0	0	0	0	0	0	0	0	0	0	0	0	0	0	0	0.0196155	0	0	0	0	0	0	0	0.0233155	0.0232432	0	0	0	0	0	0	0	0	0	0	0	0	0	0	0
Proteobacteria	Alphaproteobacteria	Rhodobacterales	Rhodobacteraceae	Octadecabacter	0	0.00197623	0.251591	0.517158	0	0	0	0	0	0	0	0	0	0	0	0	0	0	0	0	0	0	0	0	0	0.041658	0	0	0	0.00774773	0	0	0	0	0	0	0	0	0	0	0	0	0	0	0
Verrucomicrobia	Opitutae	unclassified (derived from Opitutae)	Opitutaceae	Diplosphaera	0.00111066	0.000309909	0.25167	0.515636	0	0.00848176	0	0	0	0	0	0	0.00796495	0.00687711	0	0	0	0	0	0	0	0	0	0	0	0	0	0	0	0.00774773	0	0	0	0	0	0	0	0	0	0	0	0	0	0	0
Proteobacteria	Deltaproteobacteria	Syntrophobacterales	Syntrophobacteraceae	Syntrophobacter	0.00194096	0.00507981	0.252403	0.515459	0	0	0	0	0	0	0.033883	0	0	0.00687711	0	0	0	0	0	0	0	0	0	0	0	0	0	0.0120322	0.0233155	0.0387387	0	0.0321027	0	0.0087535	0	0	0	0	0.0120525	0	0	0	0	0	0
Thermotogae	Thermotogae (class)	Thermotogales	Thermotogaceae	Fervidobacterium	0.000321208	0.0018952	0.254181	0.51741	0	0	0	0	0	0	0	0	0	0	0.00674536	0	0	0	0	0	0	0	0	0	0	0	0	0.0240645	0.0233155	0	0	0	0	0	0	0	0	0	0	0	0	0	0	0	0
Proteobacteria	Gammaproteobacteria	Thiotrichales	Thiotrichaceae	Beggiatoa	0.0353881	0.00784472	0.255517	0.518452	0	0	0	0	0	0	0	0	0	0.0275084	0	0	0.297619	0	0.398406	0	0.0196155	0	0	0	0	0.0104145	0	0.0120322	0	0	0	0.128411	0.0378215	0	0	0	0	0	0	0	0	0	0	0	0
Proteobacteria	Gammaproteobacteria	Aeromonadales	Aeromonadaceae	Aeromonas	0.1237	0.0660591	0.255602	0.516956	0	0.00848176	0	0	0	0	0.0169415	0	0	0.00687711	0.0674536	0	0.595238	0.0453309	0.398406	0.374532	0.0588466	0	0.015186	0.445434	0.564972	0.114559	0.0657462	0.0842257	0.0582886	0.24018	0.0905387	0.0963082	0.0378215	0	0	0	0	0	0.0361576	0	0	0.373134	0.0156904	0	0.0244559
Fusobacteria	Fusobacteriia	Fusobacteriales	Leptotrichiaceae	Sebaldella	0.00773395	0.016049	0.256519	0.517148	0	0.0254453	0	0	0	0.0280426	0.0169415	0.0122474	0.0318598	0.0343855	0.0134907	0	0	0	0	0	0	0	0	0	0	0.020829	0.0298846	0.0360967	0.0466309	0.0232432	0.135808	0.0963082	0	0	0	0	0	0	0	0	0.0124254	0	0	0	0
Verrucomicrobia	Spartobacteria	unclassified (derived from Spartobacteria)	unclassified (derived from Spartobacteria)	Chthoniobacter	0.0014719	0.00487454	0.256549	0.515557	0	0	0	0	0	0	0.0112943	0	0	0	0	0	0	0	0	0	0.0196155	0	0	0	0	0	0.00597693	0	0.0349732	0.0232432	0	0	0	0	0	0	0	0	0	0	0	0	0	0	0
Planctomycetes	Planctomycetia	Planctomycetales	Planctomycetaceae	Isosphaera	0.000537825	0.00345347	0.259941	0.52071	0	0	0	0	0	0	0.0112943	0	0	0	0	0	0	0	0	0	0	0	0	0	0	0	0	0	0	0.0542341	0	0.0321027	0	0	0	0	0	0	0	0	0	0	0	0	0
Firmicutes	Bacilli	Bacillales	Bacillaceae	Lysinibacillus	0.00374639	0.000690495	0.26536	0.529878	0	0	0	0	0.0545108	0	0.0112943	0.0061237	0	0	0.00674536	0	0	0	0	0	0	0	0	0	0	0	0	0.0120322	0	0	0	0	0	0	0	0	0	0	0	0	0	0	0.00523013	0	0
Proteobacteria	Alphaproteobacteria	Caulobacterales	Caulobacteraceae	Asticcacaulis	0.000268913	0.0015824	0.265419	0.528319	0	0	0	0	0	0	0.00564717	0	0	0	0	0	0	0	0	0	0	0	0	0	0	0	0	0.0240645	0	0.0154955	0	0	0	0	0	0	0	0	0	0	0	0	0	0	0
Firmicutes	Clostridia	Clostridiales	Peptostreptococcaceae	unclassified (derived from Peptostreptococcaceae)	0.0790518	0.0419462	0.269498	0.534745	0	0.14419	0	0	0.299809	0.560852	0.129885	0.153092	0.167264	0.137542	0.0674536	0	0	0	0	0	0	0	0	0	0	0.0520725	0.0358616	0.132355	0.198181	0.0542341	0.0452694	0.224719	0.075643	0.0087535	0	0	0	0.0363372	0	0	0.13668	0	0.0104603	0	0.0244559
Aquificae	Aquificae (class)	Aquificales	Hydrogenothermaceae	Persephonella	0	0.00204985	0.270301	0.534653	0	0	0	0	0	0	0	0	0	0	0	0	0	0	0	0	0	0	0	0	0	0	0.00597693	0	0	0	0.0452694	0	0	0	0	0	0	0	0	0	0	0	0	0	0
Proteobacteria	Gammaproteobacteria	Thiotrichales	Piscirickettsiaceae	Methylophaga	0	0.00204985	0.270301	0.532977	0	0	0	0	0	0	0	0	0	0	0	0	0	0	0	0	0	0	0	0	0	0	0.00597693	0	0	0	0.0452694	0	0	0	0	0	0	0	0	0	0	0	0	0	0
Proteobacteria	Gammaproteobacteria	Enterobacteriales	Enterobacteriaceae	Yersinia	0.320745	0.205006	0.271881	0.534417	0	0.237489	0	0	0.0272554	0	0.282358	0.061237	0.0955795	0.130665	0.236088	0.255754	0.595238	0.49864	1.19522	1.1236	0.137309	1.3986	0.015186	0.445434	0	0.333264	0.137469	0.300806	0.186524	0.333153	0.72431	0.417335	0.340393	0.0087535	0.102041	0.0488878	0	0.0363372	0.0361576	0	0	0.373134	0.0993724	0.242131	0
Nitrospirae	Nitrospira (class)	Nitrospirales	Nitrospiraceae	Nitrospira	0	0.0166908	0.27413	0.537159	0	0	0	0	0	0	0	0	0	0	0	0	0	0	0	0	0	0	0	0	0	0	0	0.0120322	0	0	0	0.0321027	0	0	0	0	0	0	0	0	0	0.373134	0	0	0
Actinobacteria	Actinobacteria (class)	Actinomycetales	Micromonosporaceae	Salinispora	0.014491	0.0343076	0.277991	0.543032	0	0	0	0	0	0	0	0	0	0.0137542	0	0.255754	0	0	0	0	0.0196155	0	0.015186	0	0	0.124974	0.0179308	0.240645	0.10492	0.0154955	0	0.192616	0.113464	0	0.0340136	0	0	0	0	0	0	0	0	0	0
Proteobacteria	Deltaproteobacteria	Syntrophobacterales	Syntrophaceae	Syntrophus	0.00112103	0.00639903	0.278391	0.542129	0	0	0	0	0	0	0.0112943	0.0122474	0	0	0	0	0	0	0	0	0	0	0	0	0	0.0104145	0	0.0360967	0	0	0	0	0.113464	0	0	0	0	0	0	0	0	0	0	0	0
Bacteroidetes	Flavobacteriia	Flavobacteriales	Flavobacteriaceae	Polaribacter	0.00576712	0.0119086	0.278763	0.541179	0	0	0	0	0	0	0.0395302	0.0122474	0.00796495	0.0343855	0.0269815	0	0	0	0	0	0	0	0	0	0	0.0312435	0.00597693	0.0360967	0.0349732	0.0232432	0.0905387	0	0.075643	0	0	0	0	0	0	0	0	0	0	0	0
Actinobacteria	Actinobacteria (class)	Actinomycetales	Mycobacteriaceae	Mycobacterium	0.24119	0.450917	0.280687	0.543236	0	0.00848176	0	0	0.0272554	0	0.0225887	0	0	0	0.00674536	0.767263	2.97619	0	0	1.1236	0.117693	0	0.015186	0	0	0.937305	0.549877	0.96258	1.57379	0.449369	0.860118	2.02247	1.36157	0.017507	0	0	0.389105	0	0.0482102	0	0.0124254	0	0.0209205	0.363196	0.0489117
Firmicutes	Bacilli	Lactobacillales	Leuconostocaceae	Weissella	0	0.00551989	0.284363	0.548664	0	0	0	0	0	0	0	0	0	0	0	0	0	0	0	0	0	0	0	0	0	0	0	0	0	0	0	0	0	0	0	0	0	0	0.0120525	0.125945	0	0	0	0	0
Proteobacteria	Betaproteobacteria	Burkholderiales	Burkholderiaceae	Burkholderia	1.30124	2.04019	0.285706	0.549569	0	0.0424088	0	0	0.0817661	0.0841279	0.0564717	0.0061237	0.0318598	0.0137542	0.0876897	3.83632	2.38095	0.0453309	0	0	8.68968	2.7972	9.17236	0	0	1.02062	5.52866	0.806161	0.897645	3.93585	0.633771	0.0642055	0.340393	4.73564	3.26531	3.12882	0.389105	2.68895	3.67603	3.27456	1.44135	1.1194	1.08264	1.21065	3.22817
Proteobacteria	Betaproteobacteria	Nitrosomonadales	Nitrosomonadaceae	Nitrosospira	0.00567112	0.0127681	0.286974	0.550326	0	0.0254453	0	0	0	0	0	0	0	0	0	0	0	0	0	0	0.0784621	0	0.015186	0	0	0	0.0298846	0	0	0.0387387	0	0	0	0.0437675	0	0.0488878	0	0.109012	0	0	0	0	0	0	0.0489117
Bacteroidetes	Flavobacteriia	Flavobacteriales	Flavobacteriaceae	Robiginitalea	0.00421529	0.0100487	0.287795	0.550221	0	0.00848176	0	0	0	0	0.0395302	0.0061237	0	0.0343855	0	0	0	0	0	0	0	0	0	0	0	0.0104145	0.00597693	0.0240645	0.0233155	0.0154955	0	0.0963082	0.075643	0	0	0	0	0	0	0	0	0	0	0	0
Proteobacteria	Alphaproteobacteria	Rhodospirillales	Acetobacteraceae	Granulibacter	0.00362542	0.0075649	0.288485	0.54987	0	0.0169635	0	0	0	0	0.00564717	0	0.00796495	0	0	0	0	0	0	0	0	0	0.0455581	0	0	0.0520725	0.0239077	0.0120322	0	0.0154955	0	0.0321027	0.0378215	0	0	0	0	0	0	0	0	0	0.0156904	0	0
Proteobacteria	Alphaproteobacteria	Rhodobacterales	Rhodobacteraceae	Labrenzia	0.00144629	0.00390741	0.288629	0.548483	0	0	0	0	0	0	0	0	0	0	0	0	0	0	0	0	0	0	0.0303721	0	0	0	0.0239077	0.0120322	0.0233155	0.0309909	0	0	0	0	0	0	0	0	0	0	0	0	0	0	0
Proteobacteria	Alphaproteobacteria	Rhizobiales	Methylocystaceae	Methylocystis	0.00059012	0.00414553	0.292915	0.554951	0	0	0	0	0	0	0.00564717	0	0	0	0.00674536	0	0	0	0	0	0	0	0	0	0	0.0104145	0	0	0.0116577	0	0	0	0	0	0	0	0	0	0	0	0	0	0	0	0
Proteobacteria	Gammaproteobacteria	Pasteurellales	Pasteurellaceae	Pasteurella	0.129226	0.0438527	0.296214	0.559516	0	0	0	0	0.0272554	0	0	0	0	0	0	0	0	0.0906618	0.398406	1.49813	0	0.699301	0	0	0	0.124974	0.0179308	0.0601612	0.0349732	0.116216	0.0905387	0	0	0	0	0	0	0.0363372	0	0	0	0	0.00523013	0	0.0489117
Verrucomicrobia	Opitutae	Puniceicoccales	Puniceicoccaceae	Coraliomargarita	0.000268913	0.00131445	0.296253	0.557914	0	0	0	0	0	0	0.00564717	0	0	0	0	0	0	0	0	0	0	0	0	0	0	0.020829	0	0.0120322	0	0	0	0	0	0	0	0	0	0	0	0	0	0	0	0	0
Proteobacteria	Gammaproteobacteria	Pseudomonadales	Moraxellaceae	Acinetobacter	0.237924	0.379467	0.298351	0.560187	0	0.771841	0	0	0	0	0.451773	0.0061237	0.0318598	0.529537	0.849916	0	0	0.0453309	1.19522	0.749064	0.274617	0	0.0911162	0	0	0.604041	0.322754	1.05884	0.524598	2.18486	1.26754	0.0963082	0.642965	0.017507	0	0.171107	0	0.145349	0.204893	0	0	0	0.507322	0	0.146735
Spirochaetes	Spirochaetia	Spirochaetales	Spirochaetaceae	Borrelia	0.000291605	0.00197917	0.298819	0.559396	0	0	0	0	0	0	0	0.0061237	0	0	0	0	0	0	0	0	0	0	0	0	0	0	0	0	0.0116577	0	0	0	0.0378215	0	0	0	0	0	0	0	0	0	0	0	0
Firmicutes	Clostridia	Clostridiales	Peptococcaceae	Desulfotomaculum	0.00185118	0.0330391	0.305584	0.570362	0	0	0	0	0	0	0.0112943	0	0.00796495	0	0	0	0	0	0	0	0.0196155	0	0	0	0	0.020829	0.0239077	0	0.0349732	0	0	0	0	0	0	0	0	0	0	0	0	0.746269	0	0	0
Actinobacteria	Actinobacteria (class)	Actinomycetales	Dermacoccaceae	Dermacoccus	0.0336212	0.0957523	0.306776	0.570894	0	0	0	0	0	0	0	0	0	0	0.00674536	0	0	0	0	0	0	0.699301	0	0	0	0.104145	0.0418385	0.120322	0.10492	0.0309909	0.181077	0.0321027	0.189107	0	0.306122	0	0	0	0	0	0.0497018	0	0	0	0
Firmicutes	Erysipelotrichi	Erysipelotrichales	Erysipelotrichaceae	Bulleidia	0.00233284	0.00581413	0.307722	0.570966	0	0	0	0	0	0	0	0.0489896	0	0	0	0	0	0	0	0	0	0	0	0	0	0.0104145	0.00597693	0.0240645	0.0349732	0	0	0.0321027	0.0378215	0	0	0	0	0	0	0	0	0	0	0	0
Actinobacteria	Actinobacteria (class)	Actinomycetales	Kineosporiaceae	Kineococcus	0.0287486	0.0654697	0.311067	0.575473	0	0.00848176	0	0	0	0	0	0	0	0	0	0	0.595238	0	0	0	0	0	0	0	0	0.187461	0.0717231	0.21658	0.338074	0.0309909	0	0.321027	0.26475	0	0	0	0	0	0.0361576	0	0	0	0	0.121065	0.0489117
Tenericutes	Mollicutes	Mycoplasmatales	Mycoplasmataceae	Mycoplasma	0.668695	0.00311338	0.317722	0.586063	0	0.00848176	0	0	0.0545108	0	0.0112943	13.6558	0.00796495	0.00687711	0	0	0.297619	0	0	0	0	0	0	0	0	0	0.00597693	0.0240645	0	0	0	0.0321027	0	0	0	0	0	0	0	0	0	0	0.0156904	0	0
Proteobacteria	Gammaproteobacteria	Enterobacteriales	Enterobacteriaceae	Arsenophonus	0.0163821	0.00373001	0.317925	0.584722	0	0.00848176	0	0	0	0	0	0.0061237	0.00796495	0.00687711	0.0134907	0.255754	0	0.0453309	0	0	0	0	0	0	0	0.041658	0	0.0360967	0	0.0154955	0	0	0	0	0	0	0	0	0	0	0	0	0	0	0
Proteobacteria	Alphaproteobacteria	Rhodobacterales	Hyphomonadaceae	Oceanicaulis	0.000881725	0.00268336	0.318992	0.584974	0	0	0	0	0	0	0.00564717	0.0061237	0	0	0.00674536	0	0	0	0	0	0	0	0	0	0	0.0104145	0.0179308	0	0	0.0387387	0	0	0	0	0	0	0	0	0	0	0	0	0	0	0
unclassified (derived from Bacteria)	unclassified (derived from Bacteria)	unclassified (derived from Bacteria)	unclassified (derived from Bacteria)	unclassified (derived from Bacteria)	0.541166	0.0596423	0.321467	0.587799	0	0.0763359	0	10	0.0272554	0	0.101649	0.0551133	0.0477897	0.192559	0.0876897	0.255754	0.297619	0	0	0	0	0	0	0.222717	0	0.041658	0.0119539	0.0120322	0.0816041	0.0542341	0.181077	0.160514	0	0.0087535	0	0	0	0	0.0120525	0.125945	0.0248509	0	0.0156904	0	0.0489117
Proteobacteria	Alphaproteobacteria	Rickettsiales	Anaplasmataceae	Wolbachia	0.0904048	0.0143767	0.325861	0.594106	0	0.00848176	0	0	0.0272554	0	0	0.0061237	0	0	0	0	0.297619	0	0	0	0	0	0	1.55902	0	0	0.0298846	0	0.0116577	0	0.271616	0	0	0	0	0	0	0	0	0	0	0	0.0313808	0	0
Proteobacteria	Gammaproteobacteria	Enterobacteriales	Enterobacteriaceae	Hafnia	0.251726	0	0.327089	0.594622	0	0.0169635	5.26316	0	0	0	0	0.0061237	0	0	0	0	0	0	0	0	0	0	0	0	0	0	0	0	0	0	0	0	0	0	0	0	0	0	0	0	0	0	0	0	0
Proteobacteria	Alphaproteobacteria	Rhodobacterales	Rhodobacteraceae	Phaeobacter	0	0.00124974	0.327287	0.593266	0	0	0	0	0	0	0	0	0	0	0	0	0	0	0	0	0	0	0	0	0	0.0312435	0	0	0	0	0	0	0	0	0	0	0	0	0	0	0	0	0	0	0
Firmicutes	Erysipelotrichi	Erysipelotrichales	Erysipelotrichaceae	Turicibacter	0	0.00096258	0.327287	0.591562	0	0	0	0	0	0	0	0	0	0	0	0	0	0	0	0	0	0	0	0	0	0	0	0.0240645	0	0	0	0	0	0	0	0	0	0	0	0	0	0	0	0	0
Proteobacteria	Betaproteobacteria	Gallionellales	Gallionellaceae	Gallionella	0	0.000478154	0.327287	0.589867	0	0	0	0	0	0	0	0	0	0	0	0	0	0	0	0	0	0	0	0	0	0	0.0119539	0	0	0	0	0	0	0	0	0	0	0	0	0	0	0	0	0	0
Proteobacteria	Alphaproteobacteria	Rickettsiales	unclassified (derived from Rickettsiales)	Candidatus Odyssella	0	0.00041658	0.327287	0.588181	0	0	0	0	0	0	0	0	0	0	0	0	0	0	0	0	0	0	0	0	0	0.0104145	0	0	0	0	0	0	0	0	0	0	0	0	0	0	0	0	0	0	0
Proteobacteria	Alphaproteobacteria	Rhizobiales	Rhizobiaceae	Candidatus Liberibacter	0	0.00041658	0.327287	0.586506	0	0	0	0	0	0	0	0	0	0	0	0	0	0	0	0	0	0	0	0	0	0.0104145	0	0	0	0	0	0	0	0	0	0	0	0	0	0	0	0	0	0	0
Chlamydiae	Chlamydiia	Chlamydiales	Parachlamydiaceae	Parachlamydia	0	0.000309909	0.327287	0.584839	0	0	0	0	0	0	0	0	0	0	0	0	0	0	0	0	0	0	0	0	0	0	0	0	0	0.00774773	0	0	0	0	0	0	0	0	0	0	0	0	0	0	0
Bacteroidetes	Flavobacteriia	Flavobacteriales	Flavobacteriaceae	Bergeyella	0	0.000619819	0.327287	0.583183	0	0	0	0	0	0	0	0	0	0	0	0	0	0	0	0	0	0	0	0	0	0	0	0	0	0.0154955	0	0	0	0	0	0	0	0	0	0	0	0	0	0	0
Deferribacteres	Deferribacteres (class)	Deferribacterales	Deferribacteraceae	Calditerrivibrio	0	0.000929728	0.327287	0.581535	0	0	0	0	0	0	0	0	0	0	0	0	0	0	0	0	0	0	0	0	0	0	0	0	0	0.0232432	0	0	0	0	0	0	0	0	0	0	0	0	0	0	0
Chlamydiae	Chlamydiia	Chlamydiales	Chlamydiaceae	Chlamydophila	0	0.000309909	0.327287	0.579897	0	0	0	0	0	0	0	0	0	0	0	0	0	0	0	0	0	0	0	0	0	0	0	0	0	0.00774773	0	0	0	0	0	0	0	0	0	0	0	0	0	0	0
Planctomycetes	Planctomycetia	Planctomycetales	unclassified (derived from Planctomycetales)	unclassified (derived from Planctomycetales)	0	0.000309909	0.327287	0.578268	0	0	0	0	0	0	0	0	0	0	0	0	0	0	0	0	0	0	0	0	0	0	0	0	0	0.00774773	0	0	0	0	0	0	0	0	0	0	0	0	0	0	0
Proteobacteria	Epsilonproteobacteria	unclassified (derived from Epsilonproteobacteria)	unclassified (derived from Epsilonproteobacteria)	Nitratifractor	0	0.000478154	0.327287	0.576648	0	0	0	0	0	0	0	0	0	0	0	0	0	0	0	0	0	0	0	0	0	0	0.0119539	0	0	0	0	0	0	0	0	0	0	0	0	0	0	0	0	0	0
Actinobacteria	Actinobacteria (class)	Actinomycetales	Micromonosporaceae	Actinoplanes	0	0.000309909	0.327287	0.575038	0	0	0	0	0	0	0	0	0	0	0	0	0	0	0	0	0	0	0	0	0	0	0	0	0	0.00774773	0	0	0	0	0	0	0	0	0	0	0	0	0	0	0
Bacteroidetes	Flavobacteriia	Flavobacteriales	Flavobacteriaceae	Ornithobacterium	0	0.000309909	0.327287	0.573436	0	0	0	0	0	0	0	0	0	0	0	0	0	0	0	0	0	0	0	0	0	0	0	0	0	0.00774773	0	0	0	0	0	0	0	0	0	0	0	0	0	0	0
Proteobacteria	Alphaproteobacteria	Rhodobacterales	Rhodobacteraceae	Thalassobium	0	0.00048129	0.327287	0.571843	0	0	0	0	0	0	0	0	0	0	0	0	0	0	0	0	0	0	0	0	0	0	0	0.0120322	0	0	0	0	0	0	0	0	0	0	0	0	0	0	0	0	0
Firmicutes	Clostridia	Clostridiales	Heliobacteriaceae	Heliobacillus	0	0.00048129	0.327287	0.570259	0	0	0	0	0	0	0	0	0	0	0	0	0	0	0	0	0	0	0	0	0	0	0	0.0120322	0	0	0	0	0	0	0	0	0	0	0	0	0	0	0	0	0
Deinococcus-Thermus	Deinococci	Thermales	Thermaceae	Oceanithermus	0	0.00144387	0.327287	0.568684	0	0	0	0	0	0	0	0	0	0	0	0	0	0	0	0	0	0	0	0	0	0	0	0.0360967	0	0	0	0	0	0	0	0	0	0	0	0	0	0	0	0	0
Proteobacteria	Alphaproteobacteria	Rickettsiales	Anaplasmataceae	Neorickettsia	0	0.000978234	0.327287	0.567117	0	0	0	0	0	0	0	0	0	0	0	0	0	0	0	0	0	0	0	0	0	0	0	0	0	0	0	0	0	0	0	0	0	0	0	0	0	0	0	0	0.0244559
Proteobacteria	Betaproteobacteria	Burkholderiales	Oxalobacteraceae	Collimonas	0	0.00048129	0.327287	0.565559	0	0	0	0	0	0	0	0	0	0	0	0	0	0	0	0	0	0	0	0	0	0	0	0.0120322	0	0	0	0	0	0	0	0	0	0	0	0	0	0	0	0	0
Cyanobacteria	unclassified (derived from Cyanobacteria)	Chroococcales	unclassified (derived from Chroococcales)	Cyanobium	0	0.000309909	0.327287	0.564009	0	0	0	0	0	0	0	0	0	0	0	0	0	0	0	0	0	0	0	0	0	0	0	0	0	0.00774773	0	0	0	0	0	0	0	0	0	0	0	0	0	0	0
Proteobacteria	Gammaproteobacteria	Chromatiales	Chromatiaceae	Thiocapsa	0	0.000309909	0.327287	0.562468	0	0	0	0	0	0	0	0	0	0	0	0	0	0	0	0	0	0	0	0	0	0	0	0	0	0.00774773	0	0	0	0	0	0	0	0	0	0	0	0	0	0	0
Proteobacteria	Gammaproteobacteria	Legionellales	Legionellaceae	Fluoribacter	0	0.000309909	0.327287	0.560936	0	0	0	0	0	0	0	0	0	0	0	0	0	0	0	0	0	0	0	0	0	0	0	0	0	0.00774773	0	0	0	0	0	0	0	0	0	0	0	0	0	0	0
Proteobacteria	Deltaproteobacteria	Desulfobacterales	Desulfobulbaceae	Desulfurivibrio	0	0.00154955	0.327287	0.559412	0	0	0	0	0	0	0	0	0	0	0	0	0	0	0	0	0	0	0	0	0	0	0	0	0	0.0387387	0	0	0	0	0	0	0	0	0	0	0	0	0	0	0
Actinobacteria	Actinobacteria (class)	Actinomycetales	Intrasporangiaceae	Terrabacter	0	0.00136054	0.327287	0.557896	0	0	0	0	0	0	0	0	0	0	0	0	0	0	0	0	0	0	0	0	0	0	0	0	0	0	0	0	0	0	0.0340136	0	0	0	0	0	0	0	0	0	0
Firmicutes	Clostridia	Thermoanaerobacterales	Thermoanaerobacterales Family III. Incertae Sedis	Thermoanaerobacterium	0	0.00128411	0.327287	0.556388	0	0	0	0	0	0	0	0	0	0	0	0	0	0	0	0	0	0	0	0	0	0	0	0	0	0	0	0.0321027	0	0	0	0	0	0	0	0	0	0	0	0	0
Proteobacteria	Alphaproteobacteria	Rhizobiales	unclassified (derived from Rhizobiales)	unclassified (derived from Rhizobiales)	0	0.00352423	0.327287	0.554888	0	0	0	0	0	0	0	0	0	0	0	0	0	0	0	0	0	0	0	0	0	0	0	0	0	0	0	0	0	0	0	0	0	0	0	0	0	0	0	0	0
Proteobacteria	Gammaproteobacteria	Alteromonadales	Alteromonadaceae	Glaciecola	0	0.000932618	0.327287	0.553396	0	0	0	0	0	0	0	0	0	0	0	0	0	0	0	0	0	0	0	0	0	0	0	0	0.0233155	0	0	0	0	0	0	0	0	0	0	0	0	0	0	0	0
Proteobacteria	Epsilonproteobacteria	Nautiliales	Nautiliaceae	Nautilia	0	0.000466309	0.327287	0.551913	0	0	0	0	0	0	0	0	0	0	0	0	0	0	0	0	0	0	0	0	0	0	0	0	0.0116577	0	0	0	0	0	0	0	0	0	0	0	0	0	0	0	0
Cyanobacteria	unclassified (derived from Cyanobacteria)	Chroococcales	unclassified (derived from Chroococcales)	unclassified (derived from Chroococcales)	0	0.000466309	0.327287	0.550437	0	0	0	0	0	0	0	0	0	0	0	0	0	0	0	0	0	0	0	0	0	0	0	0	0.0116577	0	0	0	0	0	0	0	0	0	0	0	0	0	0	0	0
Proteobacteria	Gammaproteobacteria	Vibrionales	Vibrionaceae	Enterovibrio	0	0.00362155	0.327287	0.548969	0	0	0	0	0	0	0	0	0	0	0	0	0	0	0	0	0	0	0	0	0	0	0	0	0	0	0.0905387	0	0	0	0	0	0	0	0	0	0	0	0	0	0
Actinobacteria	Actinobacteria (class)	Acidimicrobiales	Acidimicrobiaceae	Acidimicrobium	0	0.000932618	0.327287	0.547509	0	0	0	0	0	0	0	0	0	0	0	0	0	0	0	0	0	0	0	0	0	0	0	0	0.0233155	0	0	0	0	0	0	0	0	0	0	0	0	0	0	0	0
Chlamydiae	Chlamydiia	Chlamydiales	Parachlamydiaceae	Candidatus Protochlamydia	0	0.000466309	0.327287	0.546057	0	0	0	0	0	0	0	0	0	0	0	0	0	0	0	0	0	0	0	0	0	0	0	0	0.0116577	0	0	0	0	0	0	0	0	0	0	0	0	0	0	0	0
Chloroflexi	Anaerolineae	Anaerolineales	Anaerolineaceae	Anaerolinea	0	0.000932618	0.327287	0.544612	0	0	0	0	0	0	0	0	0	0	0	0	0	0	0	0	0	0	0	0	0	0	0	0	0.0233155	0	0	0	0	0	0	0	0	0	0	0	0	0	0	0	0
Cyanobacteria	unclassified (derived from Cyanobacteria)	Oscillatoriales	unclassified (derived from Oscillatoriales)	Lyngbya	0	0.000466309	0.327287	0.543175	0	0	0	0	0	0	0	0	0	0	0	0	0	0	0	0	0	0	0	0	0	0	0	0	0.0116577	0	0	0	0	0	0	0	0	0	0	0	0	0	0	0	0
Proteobacteria	Deltaproteobacteria	Desulfovibrionales	Desulfohalobiaceae	Desulfohalobium	0	0.000466309	0.327287	0.541746	0	0	0	0	0	0	0	0	0	0	0	0	0	0	0	0	0	0	0	0	0	0	0	0	0.0116577	0	0	0	0	0	0	0	0	0	0	0	0	0	0	0	0
Proteobacteria	Alphaproteobacteria	Rhodobacterales	Rhodobacteraceae	Roseibium	0	0.00181077	0.327287	0.540324	0	0	0	0	0	0	0	0	0	0	0	0	0	0	0	0	0	0	0	0	0	0	0	0	0	0	0.0452694	0	0	0	0	0	0	0	0	0	0	0	0	0	0
unclassified (derived from Bacteria)	unclassified (derived from Bacteria)	unclassified (derived from Bacteria)	unclassified (derived from Bacteria)	Candidatus Cloacamonas	0	0.000932618	0.327287	0.53891	0	0	0	0	0	0	0	0	0	0	0	0	0	0	0	0	0	0	0	0	0	0	0	0	0.0233155	0	0	0	0	0	0	0	0	0	0	0	0	0	0	0	0
Proteobacteria	Betaproteobacteria	Burkholderiales	Burkholderiaceae	Polynucleobacter	0.00982273	0.0194898	0.328562	0.539597	0	0	0	0	0	0	0	0	0	0	0	0	0	0	0	0	0.0392311	0	0.167046	0	0	0.0104145	0.0358616	0.0120322	0	0.0542341	0	0	0	0.0087535	0.0340136	0	0	0.0726744	0.0241051	0	0	0	0.0261506	0	0.0244559
Cyanobacteria	unclassified (derived from Cyanobacteria)	Oscillatoriales	unclassified (derived from Oscillatoriales)	Leptolyngbya	0.000268913	0	0.329257	0.539329	0	0	0	0	0	0	0.00564717	0	0	0	0	0	0	0	0	0	0	0	0	0	0	0	0	0	0	0	0	0	0	0	0	0	0	0	0	0	0	0	0	0	0
Poribacteria	unclassified (derived from Poribacteria)	unclassified (derived from Poribacteria)	unclassified (derived from Poribacteria)	unclassified (derived from Poribacteria)	0.000268913	0	0.329257	0.537928	0	0	0	0	0	0	0.00564717	0	0	0	0	0	0	0	0	0	0	0	0	0	0	0	0	0	0	0	0	0	0	0	0	0	0	0	0	0	0	0	0	0	0
Proteobacteria	Gammaproteobacteria	Enterobacteriales	Enterobacteriaceae	Candidatus Riesia	0.000268913	0	0.329257	0.536535	0	0	0	0	0	0	0.00564717	0	0	0	0	0	0	0	0	0	0	0	0	0	0	0	0	0	0	0	0	0	0	0	0	0	0	0	0	0	0	0	0	0	0
Firmicutes	Clostridia	Thermoanaerobacterales	Thermodesulfobiaceae	Coprothermobacter	0.000537825	0	0.329257	0.535148	0	0	0	0	0	0	0.0112943	0	0	0	0	0	0	0	0	0	0	0	0	0	0	0	0	0	0	0	0	0	0	0	0	0	0	0	0	0	0	0	0	0	0
Firmicutes	Clostridia	Clostridiales	Ruminococcaceae	unclassified (derived from Ruminococcaceae)	0.000321208	0	0.329257	0.533769	0	0	0	0	0	0	0	0	0	0	0.00674536	0	0	0	0	0	0	0	0	0	0	0	0	0	0	0	0	0	0	0	0	0	0	0	0	0	0	0	0	0	0
Proteobacteria	Epsilonproteobacteria	Campylobacterales	Helicobacteraceae	Sulfuricurvum	0.000321208	0	0.329257	0.532397	0	0	0	0	0	0	0	0	0	0	0.00674536	0	0	0	0	0	0	0	0	0	0	0	0	0	0	0	0	0	0	0	0	0	0	0	0	0	0	0	0	0	0
Acidobacteria	unclassified (derived from Acidobacteria)	unclassified (derived from Acidobacteria)	unclassified (derived from Acidobacteria)	Candidatus Chloracidobacterium	0.000268913	0	0.329257	0.531032	0	0	0	0	0	0	0.00564717	0	0	0	0	0	0	0	0	0	0	0	0	0	0	0	0	0	0	0	0	0	0	0	0	0	0	0	0	0	0	0	0	0	0
Bacteroidetes	Sphingobacteriia	Sphingobacteriales	unclassified (derived from Sphingobacteriales)	unclassified (derived from Sphingobacteriales)	0.000537825	0	0.329257	0.529674	0	0	0	0	0	0	0.0112943	0	0	0	0	0	0	0	0	0	0	0	0	0	0	0	0	0	0	0	0	0	0	0	0	0	0	0	0	0	0	0	0	0	0
Proteobacteria	Gammaproteobacteria	Enterobacteriales	Enterobacteriaceae	Candidatus Ishikawaella	0.000537825	0	0.329257	0.528322	0	0	0	0	0	0	0.0112943	0	0	0	0	0	0	0	0	0	0	0	0	0	0	0	0	0	0	0	0	0	0	0	0	0	0	0	0	0	0	0	0	0	0
Proteobacteria	Gammaproteobacteria	Enterobacteriales	Enterobacteriaceae	Kluyvera	0.000327481	0	0.329257	0.526978	0	0	0	0	0	0	0	0	0	0.00687711	0	0	0	0	0	0	0	0	0	0	0	0	0	0	0	0	0	0	0	0	0	0	0	0	0	0	0	0	0	0	0
Proteobacteria	Gammaproteobacteria	Enterobacteriales	Enterobacteriaceae	Candidatus Blochmannia	0.000268913	0	0.329257	0.525641	0	0	0	0	0	0	0.00564717	0	0	0	0	0	0	0	0	0	0	0	0	0	0	0	0	0	0	0	0	0	0	0	0	0	0	0	0	0	0	0	0	0	0
Proteobacteria	Gammaproteobacteria	Enterobacteriales	Enterobacteriaceae	Candidatus Hamiltonella	0.000327481	0	0.329257	0.52431	0	0	0	0	0	0	0	0	0	0.00687711	0	0	0	0	0	0	0	0	0	0	0	0	0	0	0	0	0	0	0	0	0	0	0	0	0	0	0	0	0	0	0
Cyanobacteria	unclassified (derived from Cyanobacteria)	Oscillatoriales	unclassified (derived from Oscillatoriales)	Oscillatoria	0.000537825	0	0.329257	0.522986	0	0	0	0	0	0	0.0112943	0	0	0	0	0	0	0	0	0	0	0	0	0	0	0	0	0	0	0	0	0	0	0	0	0	0	0	0	0	0	0	0	0	0
Proteobacteria	Epsilonproteobacteria	Campylobacterales	unclassified (derived from Campylobacterales)	unclassified (derived from Campylobacterales)	0.000321208	0	0.329257	0.521668	0	0	0	0	0	0	0	0	0	0	0.00674536	0	0	0	0	0	0	0	0	0	0	0	0	0	0	0	0	0	0	0	0	0	0	0	0	0	0	0	0	0	0
Proteobacteria	Alphaproteobacteria	Rhodobacterales	Rhodobacteraceae	Pannonibacter	0.00133536	0	0.329257	0.520358	0	0	0	0	0	0.0280426	0	0	0	0	0	0	0	0	0	0	0	0	0	0	0	0	0	0	0	0	0	0	0	0	0	0	0	0	0	0	0	0	0	0	0
Nitrospirae	unclassified (derived from Nitrospirae)	unclassified (derived from Nitrospirae)	unclassified (derived from Nitrospirae)	unclassified (derived from Nitrospirae)	0.000379284	0	0.329257	0.519054	0	0	0	0	0	0	0	0	0.00796495	0	0	0	0	0	0	0	0	0	0	0	0	0	0	0	0	0	0	0	0	0	0	0	0	0	0	0	0	0	0	0	0
Bacteroidetes	Flavobacteriia	Flavobacteriales	Flavobacteriaceae	Elizabethkingia	0.00129788	0	0.329257	0.517756	0	0	0	0	0.0272554	0	0	0	0	0	0	0	0	0	0	0	0	0	0	0	0	0	0	0	0	0	0	0	0	0	0	0	0	0	0	0	0	0	0	0	0
Proteobacteria	Gammaproteobacteria	Enterobacteriales	Enterobacteriaceae	Wigglesworthia	0.00215862	0	0.329257	0.516465	0	0	0	0	0	0	0	0	0	0	0	0	0	0.0453309	0	0	0	0	0	0	0	0	0	0	0	0	0	0	0	0	0	0	0	0	0	0	0	0	0	0	0
Proteobacteria	Gammaproteobacteria	Enterobacteriales	Enterobacteriaceae	Morganella	0.00215862	0	0.329257	0.51518	0	0	0	0	0	0	0	0	0	0	0	0	0	0.0453309	0	0	0	0	0	0	0	0	0	0	0	0	0	0	0	0	0	0	0	0	0	0	0	0	0	0	0
Tenericutes	Mollicutes	Entomoplasmatales	Spiroplasmataceae	Spiroplasma	0.000291605	0	0.329257	0.513902	0	0	0	0	0	0	0	0.0061237	0	0	0	0	0	0	0	0	0	0	0	0	0	0	0	0	0	0	0	0	0	0	0	0	0	0	0	0	0	0	0	0	0
Proteobacteria	Alphaproteobacteria	Sphingomonadales	Sphingomonadaceae	Citromicrobium	0.000723144	0	0.329257	0.51263	0	0	0	0	0	0	0	0	0	0	0	0	0	0	0	0	0	0	0.015186	0	0	0	0	0	0	0	0	0	0	0	0	0	0	0	0	0	0	0	0	0	0
Firmicutes	Clostridia	Clostridiales	unclassified (derived from Clostridiales)	Epulopiscium	0.00259575	0	0.329257	0.511364	0	0	0	0	0.0545108	0	0	0	0	0	0	0	0	0	0	0	0	0	0	0	0	0	0	0	0	0	0	0	0	0	0	0	0	0	0	0	0	0	0	0	0
Firmicutes	Clostridia	Clostridiales	Eubacteriaceae	Eubacterium	0.0181095	0.0310855	0.329493	0.510471	0	0.00848176	0	0	0.109022	0.168256	0.0282358	0.0306185	0	0.0137542	0.00674536	0	0	0	0	0	0	0	0.015186	0	0	0.041658	0.0298846	0.0842257	0.0932618	0.00774773	0.135808	0.0642055	0.0378215	0	0	0	0	0	0	0	0.0124254	0	0.00523013	0	0
Firmicutes	Clostridia	Clostridiales	unclassified (derived from Clostridiales)	Pseudoflavonifractor	0.252397	0.00310113	0.331618	0.5125	0	0.0169635	5.26316	0	0	0	0	0.0122474	0.00796495	0	0	0	0	0	0	0	0	0	0	0	0	0.0104145	0.00597693	0	0.0233155	0	0	0	0.0378215	0	0	0	0	0	0	0	0	0	0	0	0
Tenericutes	Mollicutes	Acholeplasmatales	Acholeplasmataceae	Candidatus Phytoplasma	0.252649	0.0035317	0.331937	0.511737	0	0.00848176	5.26316	0	0	0	0.00564717	0	0.00796495	0.00687711	0.0134907	0	0	0	0	0	0	0	0	0	0	0	0	0.0120322	0	0.0309909	0.0452694	0	0	0	0	0	0	0	0	0	0	0	0	0	0
Proteobacteria	Gammaproteobacteria	Enterobacteriales	Enterobacteriaceae	Plesiomonas	0.000268913	0.0149254	0.335975	0.516695	0	0	0	0	0	0	0.00564717	0	0	0	0	0	0	0	0	0	0	0	0	0	0	0	0	0	0	0	0	0	0	0	0	0	0	0	0	0	0	0.373134	0	0	0
Firmicutes	Clostridia	Thermoanaerobacterales	Thermoanaerobacterales Family III. Incertae Sedis	Caldicellulosiruptor	0.0012541	0.00288187	0.340235	0.52197	0	0	0	0	0	0	0	0.0183711	0.00796495	0	0	0	0	0	0	0	0	0	0	0	0	0.020829	0	0.0240645	0.0116577	0.0154955	0	0	0	0	0	0	0	0	0	0	0	0	0	0	0
Proteobacteria	Gammaproteobacteria	Oceanospirillales	Alcanivoracaceae	Kangiella	0.000648196	0.00219595	0.341469	0.522589	0	0	0	0	0	0	0.00564717	0	0.00796495	0	0	0	0	0	0	0	0	0	0	0	0	0	0.0239077	0	0	0.0309909	0	0	0	0	0	0	0	0	0	0	0	0	0	0	0
Firmicutes	Clostridia	Clostridiales	Lachnospiraceae	Coprococcus	0.0284404	0.00843147	0.343875	0.524994	0	0	0	0	0	0	0	0	0	0	0	0	0	0	0	0.374532	0	0	0	0.222717	0	0.0312435	0.00597693	0.0120322	0.0116577	0.00774773	0.0452694	0	0	0.0087535	0	0	0	0	0	0	0	0	0	0	0
Firmicutes	Clostridia	Thermoanaerobacterales	Thermoanaerobacteraceae	Moorella	0.000321208	0.00118354	0.344628	0.524869	0	0	0	0	0	0	0	0	0	0	0.00674536	0	0	0	0	0	0	0	0	0	0	0	0.0179308	0	0.0116577	0	0	0	0	0	0	0	0	0	0	0	0	0	0	0	0
Proteobacteria	Alphaproteobacteria	Rhizobiales	Phyllobacteriaceae	Hoeflea	0.0141723	0.000478154	0.345696	0.525223	0	0	0	0	0	0	0	0	0	0	0	0	0.297619	0	0	0	0	0	0	0	0	0	0.0119539	0	0	0	0	0	0	0	0	0	0	0	0	0	0	0	0	0	0
Firmicutes	Clostridia	Thermoanaerobacterales	Thermoanaerobacteraceae	Ammonifex	0.000268913	0.000944463	0.346524	0.525213	0	0	0	0	0	0	0.00564717	0	0	0	0	0	0	0	0	0	0	0	0	0	0	0	0.0119539	0	0.0116577	0	0	0	0	0	0	0	0	0	0	0	0	0	0	0	0
Proteobacteria	Alphaproteobacteria	Rhodobacterales	Rhodobacteraceae	Sulfitobacter	0.000934073	0.00251991	0.35017	0.529464	0	0	0	0	0	0	0	0	0	0	0	0	0	0	0	0	0.0196155	0	0	0	0	0.0312435	0.0119539	0	0	0.00774773	0	0	0	0	0	0	0	0	0.0120525	0	0	0	0	0	0
Firmicutes	Clostridia	Thermoanaerobacterales	Thermoanaerobacteraceae	Thermoanaerobacter	0.134159	0.0310152	0.351575	0.530313	0	0.0508906	0	0	0.0272554	0	0.067766	0.0061237	0.0398248	0.0275084	0.0404722	0	0.297619	0	0	0	0	0	0	0	2.25989	0.0104145	0.0597693	0.21658	0.186524	0	0.0452694	0.256822	0	0	0	0	0	0	0	0	0	0	0	0	0
Firmicutes	Bacilli	Lactobacillales	Streptococcaceae	Streptococcus	3.4138	2.4467	0.354635	0.533649	5.88235	1.29771	0	0	1.82611	2.52384	1.4005	1.20024	1.74432	1.11409	0.681282	6.39386	13.9881	0.135993	0.796813	4.86891	0.411926	6.29371	0.167046	11.3586	9.60452	1.4372	0.729185	2.85164	1.55048	1.39459	8.78225	4.7512	4.34947	0.297619	0.306122	0.244439	5.83658	0.726744	0.494155	1.63728	2.13718	10.0746	0.810669	2.90557	1.14943
Proteobacteria	Gammaproteobacteria	Enterobacteriales	Enterobacteriaceae	Klebsiella	0.528287	0.304684	0.355017	0.532949	0	0.229008	0	0	0	0	0.203298	0.159216	0.358423	0.158173	0.768971	0	0.595238	0.589302	0.796813	1.1236	0.274617	0	0.0303721	4.67706	1.12994	0.322849	0.191262	0.168451	0.36139	0.209189	1.31281	0.481541	0.869894	0.017507	0	0.0488878	0	0.218023	0.0361576	0	0.0372763	0	0.381799	0	0.220103
Proteobacteria	Betaproteobacteria	Burkholderiales	Comamonadaceae	Variovorax	0.02316	0.0416866	0.359695	0.538686	0	0	0	0	0	0	0	0.0061237	0	0	0.0134907	0	0	0.0453309	0	0	0.117693	0	0.303721	0	0	0.062487	0.167354	0.0721935	0.0582886	0.178198	0	0	0	0	0.0340136	0	0	0.218023	0	0.125945	0	0	0.0679916	0	0
Firmicutes	Bacilli	Bacillales	Paenibacillaceae	Brevibacillus	0.00131326	0.00319267	0.360605	0.538767	0	0	0	0	0	0	0.00564717	0	0	0	0.00674536	0	0	0	0	0	0	0	0.015186	0	0	0	0.0179308	0.0240645	0	0	0	0	0.0378215	0	0	0	0	0	0	0	0	0	0	0	0
Deinococcus-Thermus	Deinococci	Thermales	Thermaceae	Thermus	0.0163761	0.00910163	0.36369	0.542088	0	0.0763359	0	0	0.0545108	0.0280426	0.0960018	0	0	0.0687711	0.0202361	0	0	0	0	0	0	0	0	0	0	0.083316	0.0298846	0.0120322	0.0116577	0.0697296	0	0	0	0	0	0	0	0	0	0	0	0	0.0209205	0	0
Actinobacteria	Actinobacteria (class)	Bifidobacteriales	Bifidobacteriaceae	Scardovia	0.00267073	0.0166274	0.36448	0.541981	0	0	0	0	0	0.0560852	0	0	0	0	0	0	0	0	0	0	0	0	0	0	0	0	0	0.0120322	0.0116577	0	0	0	0	0	0	0	0	0	0	0	0	0.373134	0.00523013	0	0
unclassified (derived from Bacteria)	unclassified (derived from Bacteria)	unclassified (derived from Bacteria)	unclassified (derived from Bacteria)	Thermobaculum	0.0144412	0.00131272	0.36603	0.543002	0	0	0	0	0	0	0.00564717	0	0	0	0	0	0.297619	0	0	0	0	0	0	0	0	0	0	0.0240645	0	0	0	0	0	0.0087535	0	0	0	0	0	0	0	0	0	0	0
Firmicutes	Erysipelotrichi	Erysipelotrichales	Erysipelotrichaceae	Coprobacillus	0.049192	0.016754	0.366535	0.542472	0	0.00848176	0	0	0	0.0280426	0.00564717	0.0061237	0.00796495	0.0412626	0.0134907	0	0	0	0	0	0	0.699301	0	0.222717	0	0	0	0.0240645	0.0349732	0.0154955	0.0452694	0.0963082	0.189107	0	0	0	0	0	0	0	0	0	0	0	0
Tenericutes	Mollicutes	Mycoplasmatales	Mycoplasmataceae	Ureaplasma	0.017764	0.00368876	0.367566	0.542721	0	0.0169635	0	0	0	0	0	0.318432	0.0238949	0.0137542	0	0	0	0	0	0	0	0	0	0	0	0.0104145	0	0	0	0	0	0.0321027	0	0	0	0	0	0	0	0	0.0497018	0	0	0	0
Bacteroidetes	Cytophagia	Cytophagales	Cyclobacteriaceae	Algoriphagus	0.0078032	0.00301557	0.369074	0.543671	0	0.00848176	0	0	0	0	0.101649	0.0061237	0	0.0206313	0.0269815	0	0	0	0	0	0	0	0	0	0	0.0104145	0	0	0.0116577	0.0154955	0	0	0.0378215	0	0	0	0	0	0	0	0	0	0	0	0
Actinobacteria	Actinobacteria (class)	Actinomycetales	Pseudonocardiaceae	Saccharopolyspora	0.021749	0.046661	0.371593	0.546103	0	0	0	0	0	0	0.0112943	0	0	0	0	0	0	0	0	0	0	0	0	0.445434	0	0.166632	0.0956309	0.252677	0.15155	0.0309909	0	0.321027	0.113464	0	0	0	0	0	0	0	0	0	0.0209205	0	0
Proteobacteria	Betaproteobacteria	Burkholderiales	Sutterellaceae	Sutterella	0.000321208	0.00159962	0.372266	0.545817	0	0	0	0	0	0	0	0	0	0	0.00674536	0	0	0	0	0	0	0	0	0	0	0	0.00597693	0	0	0	0	0	0	0	0.0340136	0	0	0	0	0	0	0	0	0	0
Proteobacteria	Epsilonproteobacteria	Campylobacterales	Helicobacteraceae	Sulfurimonas	0.00093402	0.001984	0.373696	0.546639	0	0	0	0	0	0	0	0.0061237	0	0	0.0134907	0	0	0	0	0	0	0	0	0	0	0.0104145	0	0.0120322	0.0116577	0.0154955	0	0	0	0	0	0	0	0	0	0	0	0	0	0	0
Firmicutes	Negativicutes	Selenomonadales	Veillonellaceae	Mitsuokella	0.00534145	0.000478154	0.375112	0.547437	0	0	0	0	0	0.11217	0	0	0	0	0	0	0	0	0	0	0	0	0	0	0	0	0.0119539	0	0	0	0	0	0	0	0	0	0	0	0	0	0	0	0	0	0
Bacteroidetes	Flavobacteriia	Flavobacteriales	Flavobacteriaceae	Dokdonia	0.00366991	0.0076078	0.376764	0.548575	0	0	0	0	0	0	0.0282358	0	0.00796495	0.0206313	0.0202361	0	0	0	0	0	0	0	0	0	0	0	0	0.0240645	0.0349732	0	0	0	0.0378215	0	0	0	0	0	0	0	0	0	0.00523013	0	0
Proteobacteria	Deltaproteobacteria	Myxococcales	Myxococcaceae	Myxococcus	0.0052879	0.0105399	0.379318	0.551018	0	0	0	0	0	0	0.0169415	0.0061237	0.0159299	0.00687711	0	0	0	0	0	0	0.0196155	0	0.0455581	0	0	0	0.0298846	0	0.0816041	0.0542341	0	0	0	0	0	0.0977756	0	0	0	0	0	0	0	0	0
Cyanobacteria	Gloeobacteria	Gloeobacterales	unclassified (derived from Gloeobacterales)	Gloeobacter	0.0144412	0.00169206	0.379812	0.550464	0	0	0	0	0	0	0.00564717	0	0	0	0	0	0.297619	0	0	0	0	0	0	0	0	0.020829	0.00597693	0	0	0.0154955	0	0	0	0	0	0	0	0	0	0	0	0	0	0	0
Firmicutes	Clostridia	Clostridiales	Clostridiales Family XI. Incertae Sedis	Peptoniphilus	0.0659437	0.114749	0.381888	0.552202	0	0.0678541	0	0	0	0	0.0451773	0.061237	0.0876145	0.0687711	0.0134907	0	0.595238	0	0	0	0	0	0	0.445434	0	0.166632	0.0418385	0.312838	0.384705	0.0232432	0	0.738363	0.26475	0	0	0	0	0	0	0	0.13668	0.746269	0.0261506	0	0
Proteobacteria	Alphaproteobacteria	Rhizobiales	Methylocystaceae	Methylosinus	0.0151064	0.00241905	0.383218	0.552853	0	0	0	0	0	0	0	0	0	0	0	0	0.297619	0	0	0	0.0196155	0	0	0	0	0.0104145	0.00597693	0	0	0.00774773	0	0	0	0	0	0	0	0.0363372	0	0	0	0	0	0	0
Proteobacteria	Betaproteobacteria	Burkholderiales	Comamonadaceae	Polaromonas	0.0430074	0.0780425	0.385558	0.554956	0	0.0339271	0	0	0	0	0	0	0	0.00687711	0.00674536	0.255754	0	0	0	0	0.235386	0	0.364465	0	0	0.0520725	0.203216	0.21658	0.116577	0.209189	0.135808	0	0.113464	0	0	0	0.77821	0	0	0.125945	0	0	0	0	0
Chloroflexi	Chloroflexi (class)	Chloroflexales	Chloroflexaceae	Chloroflexus	0.000806738	0.00200851	0.385806	0.554046	0	0	0	0	0	0	0.0169415	0	0	0	0	0	0	0	0	0	0	0	0	0	0	0	0.00597693	0.0120322	0	0.00774773	0	0	0	0	0	0	0	0	0	0	0	0	0	0	0.0244559
Bacteroidetes	Bacteroidia	Bacteroidales	Bacteroidaceae	Bacteroides	2.39865	1.68637	0.385934	0.552967	2.94118	7.54877	5.26316	0	3.13437	3.47729	6.01423	5.98898	5.66308	2.87463	7.42664	0	0	0	0	0	0.0392311	0	0	0	0	1.22891	0.484131	2.28613	2.82117	0.278918	0.407424	8.2504	4.61422	0.035014	0.782313	0.146663	0.77821	1.05378	0.168736	0.251889	8.88419	1.49254	0.198745	6.90073	0.366838
Bacteroidetes	Sphingobacteriia	Sphingobacteriales	Sphingobacteriaceae	Mucilaginibacter	0.0081152	0.00430187	0.387211	0.553535	0	0.00848176	0	0	0	0	0.0621188	0.0306185	0.00796495	0.0275084	0.0337268	0	0	0	0	0	0	0	0	0	0	0	0	0	0	0	0.0452694	0	0.0378215	0	0	0	0	0	0	0	0	0	0	0	0.0244559
Proteobacteria	Betaproteobacteria	Burkholderiales	Comamonadaceae	Comamonas	0.0762747	0.130777	0.39088	0.557513	0	0	0	0	0	0	0	0	0	0	0	0	1.19048	0	0	0	0.274617	0	0.136674	0	0	0.0729015	0.0896539	0.0601612	0.10492	0.162702	0.135808	0	0.075643	0.113796	0	0.171107	0	0.436047	0.156683	0.251889	0.0372763	0.373134	0.115063	0.121065	0.195647
Proteobacteria	Gammaproteobacteria	Enterobacteriales	Enterobacteriaceae	Providencia	0.102507	0.0467382	0.393837	0.560461	0	0.0339271	0	0	0	0	0.0451773	0.0244948	0.0477897	0.0756482	0.0472175	0	0	0.543971	1.19522	0	0.0784621	0	0.0607441	0	0	0.0729015	0.0896539	0.120322	0.0466309	0.0542341	0.543232	0.0963082	0	0	0	0	0	0	0.0241051	0	0	0	0	0.121065	0
Acidobacteria	unclassified (derived from Acidobacteria)	unclassified (derived from Acidobacteria)	unclassified (derived from Acidobacteria)	Candidatus Koribacter	0.00496707	0.0107471	0.395471	0.561515	0	0	0	0	0	0	0.0790603	0.0183711	0	0.00687711	0	0	0	0	0	0	0	0	0	0	0	0.0104145	0.0239077	0.0120322	0.0233155	0.108468	0.0905387	0	0	0	0	0	0	0	0	0	0	0	0	0	0
Firmicutes	Clostridia	Clostridiales	Lachnospiraceae	Shuttleworthia	0.00082943	0.00350701	0.396014	0.56102	0	0	0	0	0	0	0.0112943	0.0061237	0	0	0	0	0	0	0	0	0	0	0	0	0	0	0	0.0120322	0	0	0	0	0.075643	0	0	0	0	0	0	0	0	0	0	0	0
Proteobacteria	Alphaproteobacteria	Rhodospirillales	Acetobacteraceae	Roseomonas	0.0141723	0.00186235	0.397119	0.561321	0	0	0	0	0	0	0	0	0	0	0	0	0.297619	0	0	0	0	0	0	0	0	0	0	0	0.0233155	0.0232432	0	0	0	0	0	0	0	0	0	0	0	0	0	0	0
Cyanobacteria	unclassified (derived from Cyanobacteria)	Oscillatoriales	unclassified (derived from Oscillatoriales)	Microcoleus	0.000806738	0.00217884	0.399234	0.563046	0	0	0	0	0	0	0.0169415	0	0	0	0	0	0	0	0	0	0	0	0	0	0	0.0104145	0.0119539	0	0	0	0	0.0321027	0	0	0	0	0	0	0	0	0	0	0	0	0
Proteobacteria	Alphaproteobacteria	Rhodospirillales	Acetobacteraceae	Acetobacter	0.0269034	0.00366785	0.39965	0.562371	0	0	0	0	0	0	0	0	0	0	0	0	0	0	0	0	0	0	0	0	0.564972	0.0104145	0.0119539	0	0.0116577	0	0	0	0	0	0	0	0	0	0	0	0	0	0	0	0
Firmicutes	Bacilli	Lactobacillales	Leuconostocaceae	Oenococcus	0.0125119	0.00322139	0.400583	0.562426	0	0	0	0	0	0	0.00564717	0	0	0.0343855	0	0	0	0	0	0	0	0	0	0.222717	0	0.0104145	0	0	0	0	0.0452694	0	0	0	0	0	0	0	0	0	0.0248509	0	0	0	0
Proteobacteria	Alphaproteobacteria	Rhizobiales	Bradyrhizobiaceae	Nitrobacter	0.0505441	0.00868148	0.400862	0.561565	0	0	0	0	0	0	0.0112943	0	0	0.00687711	0.0202361	1.02302	0	0	0	0	0	0	0	0	0	0.020829	0.0119539	0	0.0699464	0.0387387	0	0	0	0	0	0	0	0	0	0	0	0	0.0104603	0	0
Proteobacteria	Deltaproteobacteria	Desulfobacterales	Desulfobacteraceae	Desulfococcus	0.000327481	0.000944463	0.404566	0.565493	0	0	0	0	0	0	0	0	0	0.00687711	0	0	0	0	0	0	0	0	0	0	0	0	0.0119539	0	0.0116577	0	0	0	0	0	0	0	0	0	0	0	0	0	0	0	0
Aquificae	Aquificae (class)	Aquificales	Aquificaceae	Hydrogenivirga	0.000268913	0.000791199	0.407338	0.568106	0	0	0	0	0	0	0.00564717	0	0	0	0	0	0	0	0	0	0	0	0	0	0	0	0	0.0120322	0	0.00774773	0	0	0	0	0	0	0	0	0	0	0	0	0	0	0
Proteobacteria	Gammaproteobacteria	Enterobacteriales	Enterobacteriaceae	Buchnera	0.0052513	0.00145591	0.407947	0.567697	0	0	0	0	0	0	0	0	0	0	0	0	0	0.0906618	0	0	0.0196155	0	0	0	0	0	0.0119539	0	0	0	0	0	0	0	0	0.0244439	0	0	0	0	0	0	0	0	0
Acidobacteria	Solibacteres	Solibacterales	Solibacteraceae	Candidatus Solibacter	0.00764669	0.0227968	0.410061	0.569379	0	0	0	0	0	0	0.146826	0	0	0.0137542	0	0	0	0	0	0	0	0	0	0	0	0.0104145	0.0119539	0.0240645	0.419678	0.0464864	0.0452694	0	0	0	0	0	0	0	0.0120525	0	0	0	0	0	0
Proteobacteria	Gammaproteobacteria	Legionellales	Legionellaceae	Legionella	0.0189514	0.00668259	0.410328	0.568494	0	0	0	0	0	0	0.0169415	0	0.0159299	0	0.00674536	0	0.297619	0	0	0	0	0	0.0607441	0	0	0	0.0298846	0.0120322	0.0233155	0.0697296	0	0.0321027	0	0	0	0	0	0	0	0	0	0	0	0	0
Firmicutes	Clostridia	Halanaerobiales	Halanaerobiaceae	Halothermothrix	0.0269034	0.00428638	0.411703	0.569145	0	0	0	0	0	0	0	0	0	0	0	0	0	0	0	0	0	0	0	0	0.564972	0.0104145	0	0.0360967	0.0233155	0	0	0.0321027	0	0	0	0	0	0	0	0	0	0	0.00523013	0	0
Firmicutes	Negativicutes	Selenomonadales	Veillonellaceae	Thermosinus	0.000596394	0.00192944	0.413815	0.570811	0	0	0	0	0	0	0.00564717	0	0	0.00687711	0	0	0	0	0	0	0	0	0	0	0	0.0104145	0	0	0	0	0	0	0.0378215	0	0	0	0	0	0	0	0	0	0	0	0
Proteobacteria	Gammaproteobacteria	Oceanospirillales	Alcanivoracaceae	Alcanivorax	0.00370186	0.00702151	0.416309	0.572995	0	0.00848176	0	0	0	0	0.00564717	0	0	0.00687711	0.00674536	0	0	0	0	0	0.0196155	0	0.0303721	0	0	0.0312435	0.0239077	0.0120322	0	0.0852251	0	0	0	0	0	0	0	0	0	0	0	0	0.0156904	0	0
Proteobacteria	Alphaproteobacteria	Rhizobiales	Bartonellaceae	Bartonella	0.107009	0.0184389	0.418304	0.574483	0	0	0	0	0	0	0	0	0	0	0	0	0	0	0	2.24719	0	0	0	0	0	0.0312435	0.0179308	0.0601612	0.0233155	0.0619819	0.0905387	0	0.075643	0	0	0	0	0	0.0120525	0	0	0	0	0	0
Firmicutes	Clostridia	Clostridiales	Ruminococcaceae	Ruminococcus	0.0341787	0.0114877	0.418882	0.574024	0	0.00848176	0	0	0.0545108	0	0.0112943	0.0306185	0	0.0343855	0.0134907	0	0	0	0	0	0	0	0	0	0.564972	0.0104145	0	0.0240645	0.0466309	0.00774773	0	0.160514	0.0378215	0	0	0	0	0	0	0	0	0	0	0	0
Proteobacteria	Epsilonproteobacteria	Campylobacterales	Helicobacteraceae	Helicobacter	0.00706285	0.0121507	0.419775	0.573997	0	0.0169635	0	0	0	0.0280426	0.00564717	0.061237	0.0159299	0.0137542	0.00674536	0	0	0	0	0	0	0	0	0	0	0.0312435	0	0.0120322	0.0233155	0.0387387	0.0452694	0.0321027	0	0	0	0	0	0	0	0	0	0	0	0.121065	0
Thermotogae	Thermotogae (class)	Thermotogales	Thermotogaceae	Thermosipho	0.0342239	0.00687865	0.422729	0.576782	0	0	0	0	0	0	0.00564717	0	0	0.0137542	0	0	0	0	0	0	0	0.699301	0	0	0	0.020829	0.0119539	0.0120322	0.0116577	0.00774773	0	0.0321027	0.075643	0	0	0	0	0	0	0	0	0	0	0	0
Chloroflexi	Thermomicrobia (class)	Sphaerobacterales	Sphaerobacteraceae	Sphaerobacter	0.00107565	0.00251502	0.422956	0.575843	0	0	0	0	0	0	0.0225887	0	0	0	0	0	0	0	0	0	0	0	0	0	0	0	0	0.0240645	0.0233155	0.0154955	0	0	0	0	0	0	0	0	0	0	0	0	0	0	0
Proteobacteria	Gammaproteobacteria	Enterobacteriales	Enterobacteriaceae	unclassified (derived from Enterobacteriaceae)	0.0778907	0.0437557	0.423144	0.574854	0	0	0	0	0	0	0.0112943	0.0061237	0.0318598	0.0206313	0.0134907	0.255754	0	0	0	0.374532	0	0.699301	0	0.222717	0	0.041658	0.0119539	0.0240645	0.0582886	0.0309909	0.226347	0.0963082	0.0378215	0	0.0680272	0	0	0	0	0	0	0.373134	0	0	0
Firmicutes	Erysipelotrichi	Erysipelotrichales	Erysipelotrichaceae	Catenibacterium	0.0106056	0.00199415	0.430889	0.584115	0	0	0	0	0	0	0	0	0	0	0	0	0	0	0	0	0	0	0	0.222717	0	0	0	0.0120322	0	0	0	0	0.0378215	0	0	0	0	0	0	0	0	0	0	0	0
Verrucomicrobia	Opitutae	unclassified (derived from Opitutae)	Opitutaceae	Opitutus	0.0169052	0.00547434	0.434396	0.587603	0	0	0	0	0	0	0.0225887	0	0	0	0	0	0.297619	0	0	0	0.0196155	0	0.015186	0	0	0.0104145	0.0179308	0.0120322	0.0233155	0.0154955	0	0	0	0	0	0	0	0	0	0	0	0	0	0	0
Firmicutes	Clostridia	Clostridiales	Lachnospiraceae	Cellulosilyticum	0.000291605	0.00151286	0.435213	0.587444	0	0	0	0	0	0	0	0.0061237	0	0	0	0	0	0	0	0	0	0	0	0	0	0	0	0	0	0	0	0	0.0378215	0	0	0	0	0	0	0	0	0	0	0	0
Proteobacteria	Gammaproteobacteria	Pasteurellales	Pasteurellaceae	Actinobacillus	0.0737594	0.107407	0.436126	0.587416	0	0	0	0	0	0	0.0169415	0	0	0	0.0134907	0	0.297619	0	0.398406	0	0.0196155	0	0.015186	0.222717	0.564972	0.239533	0.083677	0.21658	0.0932618	0.224684	0.497963	0.160514	0.113464	0.0612745	0.0340136	0	0.389105	0.0726744	0.0120525	0	0	0	0.0156904	0.121065	0.122279
Firmicutes	Clostridia	Clostridiales	Lachnospiraceae	Blautia	0.089433	0.0437294	0.437216	0.587625	0	0.00848176	0	0	0.0272554	0	0.00564717	0.0122474	0	0.00687711	0.0269815	0.255754	0	0	0	0.374532	0	0	0.0303721	0	1.12994	0.062487	0.0298846	0.0721935	0.233155	0.00774773	0.226347	0.128411	0.151286	0	0	0	0	0	0.0120525	0	0	0	0	0	0
Firmicutes	Bacilli	Bacillales	Bacillaceae	Geobacillus	0.0202037	0.0298891	0.450562	0.604272	0	0.0424088	0	0	0.136277	0.0560852	0.0734131	0.0306185	0.0159299	0.0206313	0.0337268	0	0	0	0	0	0	0	0.015186	0	0	0.104145	0.0239077	0.132355	0.0816041	0.0464864	0.0905387	0.0642055	0.189107	0	0	0	0	0	0	0	0	0	0	0	0
Bacteroidetes	Flavobacteriia	Flavobacteriales	Flavobacteriaceae	Leeuwenhoekiella	0.0063737	0.00337078	0.456881	0.611443	0	0.00848176	0	0	0	0	0.067766	0.0306185	0	0	0.0269815	0	0	0	0	0	0	0	0	0	0	0	0.0179308	0.0120322	0.0233155	0.0309909	0	0	0	0	0	0	0	0	0	0	0	0	0	0	0
Firmicutes	Clostridia	Clostridiales	Syntrophomonadaceae	Dethiobacter	0.000379284	0.000947599	0.457931	0.611547	0	0	0	0	0	0	0	0	0.00796495	0	0	0	0	0	0	0	0	0	0	0	0	0	0	0.0120322	0.0116577	0	0	0	0	0	0	0	0	0	0	0	0	0	0	0	0
Proteobacteria	Betaproteobacteria	Rhodocyclales	Rhodocyclaceae	Dechloromonas	0.0175319	0.00766148	0.458958	0.611619	0	0	0	0	0	0	0.0112943	0	0	0	0	0	0	0	0	0	0.235386	0	0.121488	0	0	0	0.0657462	0.0240645	0	0.0929728	0	0	0	0.0087535	0	0	0	0	0	0	0	0	0	0	0
Actinobacteria	Actinobacteria (class)	Bifidobacteriales	Bifidobacteriaceae	Gardnerella	0.0156567	0.0279811	0.462431	0.614946	0	0	0	0	0	0	0.0112943	0.0061237	0	0.0137542	0	0	0.297619	0	0	0	0	0	0	0	0	0.0312435	0.0179308	0.0842257	0.0816041	0.0154955	0	0.0642055	0.075643	0	0	0	0	0.0726744	0	0	0	0	0.0313808	0	0.0489117
Firmicutes	Negativicutes	Selenomonadales	Acidaminococcaceae	Acidaminococcus	0.0359052	0.0107794	0.463135	0.614581	0	0.00848176	0	0	0	0	0.00564717	0.0122474	0.00796495	0.00687711	0.0134907	0	0	0	0	0	0	0.699301	0	0	0	0.0104145	0.0179308	0.0360967	0.0233155	0.0154955	0	0.128411	0.0378215	0	0	0	0	0	0	0	0	0	0	0	0
Bacteroidetes	Flavobacteriia	Flavobacteriales	Flavobacteriaceae	Croceibacter	0.00711149	0.00395698	0.473694	0.627271	0	0.0169635	0	0	0	0	0.0790603	0.0183711	0.00796495	0	0.0269815	0	0	0	0	0	0	0	0	0	0	0.0104145	0.0179308	0.0120322	0	0.0154955	0	0	0.0378215	0	0	0	0	0	0	0	0	0	0.00523013	0	0
Bacteroidetes	Cytophagia	Cytophagales	Cytophagaceae	Leadbetterella	0.00813402	0.00444241	0.476292	0.629385	0	0	0	0	0	0	0.0734131	0	0.0159299	0.0275084	0.0539629	0	0	0	0	0	0	0	0	0	0	0	0.0119539	0	0.0116577	0.0232432	0	0.0642055	0	0	0	0	0	0	0	0	0	0	0	0	0
Actinobacteria	Actinobacteria (class)	Actinomycetales	Actinomycetaceae	Actinomyces	0.234118	0.37409	0.476547	0.628403	0	0	0	0	0	0	0.00564717	0.0061237	0	0	0	0.255754	0.595238	0	0	1.1236	0.0196155	0	0.015186	2.89532	0	0.489481	0.346662	1.54013	2.73957	0.154955	0.0905387	1.25201	1.13464	0.017507	0	0	0	0.181686	0.0482102	0	0.0248509	0	0.0261506	0.363196	0.0978234
Proteobacteria	Alphaproteobacteria	Rhizobiales	Bradyrhizobiaceae	Afipia	0.000321208	0.000776219	0.478796	0.630048	0	0	0	0	0	0	0	0	0	0	0.00674536	0	0	0	0	0	0	0	0	0	0	0	0	0	0.0116577	0.00774773	0	0	0	0	0	0	0	0	0	0	0	0	0	0	0
Proteobacteria	Betaproteobacteria	Burkholderiales	Comamonadaceae	Verminephrobacter	0.0118115	0.0197498	0.480658	0.631178	0	0	0	0	0	0	0	0	0	0	0	0	0	0	0	0	0.156924	0	0.0911162	0	0	0.020829	0.083677	0.0721935	0.0816041	0.139459	0	0.0321027	0.0378215	0	0	0	0	0	0	0	0.0124254	0	0	0	0
Synergistetes	Synergistia	Synergistales	Synergistaceae	Dethiosulfovibrio	0.000670888	0.00126935	0.487751	0.639156	0	0	0	0	0	0	0	0.0061237	0.00796495	0	0	0	0	0	0	0	0	0	0	0	0	0	0.0119539	0.0120322	0	0.00774773	0	0	0	0	0	0	0	0	0	0	0	0	0	0	0
Firmicutes	Clostridia	Clostridiales	Ruminococcaceae	Anaerotruncus	0.0189717	0.00551838	0.49419	0.646249	0	0	0	0	0	0	0	0	0	0	0	0	0	0	0.398406	0	0	0	0	0	0	0	0	0.0120322	0	0	0	0	0.0378215	0	0	0	0	0	0	0	0	0	0	0	0
Firmicutes	Clostridia	Clostridiales	Peptococcaceae	Thermincola	0.00133536	0.00309488	0.494775	0.645672	0	0	0	0	0	0.0280426	0	0	0	0	0	0	0	0	0	0	0	0	0	0	0	0	0	0	0	0	0.0452694	0.0321027	0	0	0	0	0	0	0	0	0	0	0	0	0
Dictyoglomi	Dictyoglomia	Dictyoglomales	Dictyoglomaceae	Dictyoglomus	0.000706765	0.000309909	0.497311	0.647637	0	0	0	0	0	0	0	0	0.00796495	0.00687711	0	0	0	0	0	0	0	0	0	0	0	0	0	0	0	0.00774773	0	0	0	0	0	0	0	0	0	0	0	0	0	0	0
Proteobacteria	Alphaproteobacteria	Rhizobiales	Bradyrhizobiaceae	Oligotropha	0.0128212	0.00436432	0.499228	0.64879	0	0	0	0	0	0	0	0	0	0	0.0134907	0.255754	0	0	0	0	0	0	0	0	0	0.0104145	0.00597693	0.0240645	0.0116577	0.00774773	0	0	0	0	0	0	0	0	0.0120525	0	0	0	0	0	0
Firmicutes	Clostridia	Halanaerobiales	Halanaerobiaceae	Halanaerobium	0.000268913	0.000932618	0.499737	0.648112	0	0	0	0	0	0	0.00564717	0	0	0	0	0	0	0	0	0	0	0	0	0	0	0	0	0	0.0233155	0	0	0	0	0	0	0	0	0	0	0	0	0	0	0	0
Bacteroidetes	Flavobacteriia	Flavobacteriales	Flavobacteriaceae	Gramella	0.0109623	0.0184195	0.50155	0.649126	0	0.00848176	0	0	0	0	0.101649	0.0183711	0	0.0275084	0.074199	0	0	0	0	0	0	0	0	0	0	0	0.0119539	0.0360967	0.0233155	0	0.135808	0.0642055	0.189107	0	0	0	0	0	0	0	0	0	0	0	0
Proteobacteria	Gammaproteobacteria	Alteromonadales	Shewanellaceae	Shewanella	0.0639008	0.0906171	0.505075	0.652345	0	0.0508906	0	0	0	0	0.0508245	0.0367422	0.0477897	0.0275084	0.0809444	0	0	0.271985	0	0	0	0.699301	0.0759301	0	0	0.083316	0.083677	0.132355	0.128235	0.263423	0.226347	0.128411	0.151286	0.070028	0	0.0244439	0	0	0.0964204	0	0	0.373134	0.083682	0	0.0489117
Proteobacteria	Epsilonproteobacteria	Campylobacterales	Campylobacteraceae	Arcobacter	0.00059012	0.00144884	0.518462	0.668263	0	0	0	0	0	0	0.00564717	0	0	0	0.00674536	0	0	0	0	0	0	0	0	0	0	0	0	0	0	0.0309909	0	0	0	0	0	0	0	0	0	0	0	0	0.00523013	0	0
Proteobacteria	Gammaproteobacteria	Methylococcales	Methylococcaceae	Methylobacter	0.0032706	0.00199271	0.519016	0.667609	0	0.0169635	0	0	0	0	0.0112943	0.0244948	0.0159299	0	0	0	0	0	0	0	0	0	0	0	0	0.0104145	0.0239077	0	0	0.0154955	0	0	0	0	0	0	0	0	0	0	0	0	0	0	0
Fusobacteria	Fusobacteriia	Fusobacteriales	Fusobacteriaceae	Ilyobacter	0.00107565	0.00237649	0.519141	0.666407	0	0	0	0	0	0	0.0225887	0	0	0	0	0	0	0	0	0	0	0	0	0	0	0	0	0.0360967	0.0233155	0	0	0	0	0	0	0	0	0	0	0	0	0	0	0	0
Proteobacteria	Gammaproteobacteria	Alteromonadales	Moritellaceae	Moritella	0.00114373	0.000478154	0.51937	0.665343	0	0	0	0	0	0	0.00564717	0.0183711	0	0	0	0	0	0	0	0	0	0	0	0	0	0	0.0119539	0	0	0	0	0	0	0	0	0	0	0	0	0	0	0	0	0	0
Firmicutes	Clostridia	Clostridiales	Ruminococcaceae	Ethanoligenens	0.0169479	0.00745125	0.52232	0.667762	0	0.0169635	0	0	0	0	0.00564717	0.0061237	0.0159299	0.00687711	0.00674536	0	0.297619	0	0	0	0	0	0	0	0	0.0104145	0.0119539	0.0240645	0	0	0	0.0642055	0.075643	0	0	0	0	0	0	0	0	0	0	0	0
Firmicutes	Clostridia	Clostridiales	Clostridiales Family XI. Incertae Sedis	Finegoldia	0.0518609	0.0750539	0.524037	0.668599	0	0.0848176	0	0	0.0272554	0.0280426	0.0734131	0.0673607	0.0716846	0.151296	0.0202361	0	0	0	0	0	0	0	0	0	0.564972	0.062487	0.0298846	0.228613	0.221497	0.0232432	0.407424	0.385233	0.113464	0	0	0	0	0	0	0	0.149105	0	0.0313808	0	0.122279
Proteobacteria	Betaproteobacteria	Burkholderiales	Oxalobacteraceae	Herbaspirillum	0.0179839	0.030882	0.526291	0.670115	0	0	0	0	0	0	0	0	0	0	0.00674536	0.255754	0	0	0	0	0.0392311	0	0.0759301	0	0	0.020829	0.125516	0.048129	0.0116577	0.0774773	0	0	0	0	0	0.0733317	0	0	0	0.377834	0.0372763	0	0	0	0
Proteobacteria	Deltaproteobacteria	Myxococcales	Polyangiaceae	Sorangium	0.00316722	0.00521625	0.527415	0.67019	0	0	0	0	0	0	0.0395302	0	0	0	0.0269815	0	0	0	0	0	0	0	0	0	0	0.0104145	0.0179308	0.0360967	0.0349732	0.0309909	0	0	0	0	0	0	0	0	0	0	0	0	0	0	0
Firmicutes	Clostridia	Clostridiales	unclassified (derived from Clostridiales)	unclassified (derived from Clostridiales)	0.0328339	0.0208238	0.531239	0.673688	0	0.0508906	0	0	0.0545108	0	0.0451773	0.0551133	0.0477897	0.0412626	0.0202361	0	0	0	0	0.374532	0	0	0	0	0	0.0312435	0.0179308	0.0721935	0.0932618	0.0154955	0.0452694	0.0963082	0.0378215	0	0	0	0	0	0	0	0.0869781	0	0.0104603	0	0
Proteobacteria	Gammaproteobacteria	unclassified (derived from Gammaproteobacteria)	unclassified (derived from Gammaproteobacteria)	Congregibacter	0.00301308	0.00481265	0.533963	0.67578	0	0	0	0	0.0272554	0	0.00564717	0	0	0	0	0	0	0	0	0	0	0	0.0303721	0	0	0	0	0.0120322	0.0116577	0.0464864	0	0	0	0	0	0	0	0	0.0120525	0	0	0	0	0	0.0244559
Actinobacteria	Actinobacteria (class)	Actinomycetales	Frankiaceae	Frankia	0.0576872	0.0891806	0.537067	0.678344	0	0	0	0	0	0	0.0282358	0	0	0.00687711	0	0	0.892857	0	0	0	0	0	0.0607441	0.222717	0	0.114559	0.113562	0.180484	0.524598	0.0697296	0.0905387	0.192616	0.189107	0	0	0	0	0.181686	0	0	0	0	0.0156904	0	0
Cyanobacteria	unclassified (derived from Cyanobacteria)	Chroococcales	unclassified (derived from Chroococcales)	Acaryochloris	0.00179938	0.00103028	0.538176	0.678382	0	0	0	0	0	0	0.0112943	0	0	0.00687711	0	0	0	0	0	0	0.0196155	0	0	0	0	0	0.00597693	0.0120322	0	0.00774773	0	0	0	0	0	0	0	0	0	0	0	0	0	0	0
Bacteroidetes	Flavobacteriia	Flavobacteriales	Flavobacteriaceae	Flavobacterium	0.0355901	0.0227333	0.538258	0.677129	0	0.0339271	0	0	0	0	0.367066	0.0796081	0.00796495	0.130665	0.128162	0	0	0	0	0	0	0	0	0	0	0.041658	0.0239077	0.0360967	0.0699464	0.0774773	0.0452694	0.160514	0.113464	0	0	0	0	0	0	0	0	0	0	0	0
Bacteroidetes	Flavobacteriia	Flavobacteriales	Flavobacteriaceae	unclassified (derived from Flavobacteriaceae)	0.0158553	0.00796179	0.538635	0.67625	0	0.0169635	0	0	0	0	0.033883	0.0061237	0	0	0.0202361	0.255754	0	0	0	0	0	0	0	0	0	0.0104145	0.00597693	0.0360967	0.0233155	0.0154955	0	0.0321027	0.075643	0	0	0	0	0	0	0	0	0	0	0	0
Proteobacteria	unclassified (derived from Proteobacteria)	unclassified (derived from Proteobacteria)	unclassified (derived from Proteobacteria)	unclassified (derived from Proteobacteria)	0.0221452	0.0371562	0.539853	0.676429	0	0	0	0	0	0	0	0	0	0	0	0	0	0	0	0	0.0196155	0	0	0.445434	0	0.041658	0.0418385	0	0.0466309	0.0309909	0	0	0	0.035014	0	0.0488878	0	0.0726744	0.0482102	0.251889	0.0248509	0	0.0313808	0	0.0489117
Firmicutes	Erysipelotrichi	Erysipelotrichales	Erysipelotrichaceae	Erysipelothrix	0.00317896	0.00142964	0.541725	0.677425	0	0	0	0	0.0545108	0	0	0.0122474	0	0	0	0	0	0	0	0	0	0	0	0	0	0	0	0	0.0233155	0	0	0	0	0	0	0	0	0	0	0	0.0124254	0	0	0	0
Proteobacteria	Alphaproteobacteria	Sphingomonadales	Sphingomonadaceae	Zymomonas	0.0283447	0.0102498	0.541758	0.676122	0	0	0	0	0	0	0	0	0	0	0	0	0.595238	0	0	0	0	0	0	0	0	0.0104145	0.00597693	0.0120322	0.0116577	0.0154955	0	0	0	0	0	0	0	0	0	0	0	0	0	0	0.0244559
Firmicutes	Clostridia	Clostridiales	Peptostreptococcaceae	Peptostreptococcus	0.0164723	0.0226275	0.54557	0.679532	0	0.0508906	0	0	0.0272554	0.0280426	0.0451773	0.061237	0.0716846	0.0481397	0.0134907	0	0	0	0	0	0	0	0	0	0	0.020829	0.00597693	0.0721935	0.0582886	0.0154955	0	0.160514	0.075643	0	0	0	0	0	0	0	0.124254	0	0.00523013	0	0
Firmicutes	Clostridia	Clostridiales	Peptococcaceae	Pelotomaculum	0.0158444	0.00692213	0.545707	0.67836	0	0	0	0	0	0	0.0282358	0	0	0.00687711	0	0	0.297619	0	0	0	0	0	0	0	0	0	0.00597693	0.0120322	0	0.00774773	0.0452694	0.0642055	0.0378215	0	0	0	0	0	0	0	0	0	0	0	0
Proteobacteria	Gammaproteobacteria	Alteromonadales	Alteromonadaceae	Alteromonas	0.0148955	0.00611618	0.54808	0.679965	0	0	0	0	0	0	0	0	0	0	0	0	0.297619	0	0	0	0	0	0.015186	0	0	0.020829	0.0119539	0	0.0116577	0.0387387	0.0452694	0	0	0	0	0	0	0	0	0	0	0	0	0	0.0244559
Aquificae	Aquificae (class)	Aquificales	Hydrogenothermaceae	Sulfurihydrogenibium	0.000939801	0.000548987	0.549637	0.680555	0	0	0	0	0	0	0.00564717	0.0061237	0.00796495	0	0	0	0	0	0	0	0	0	0	0	0	0	0.00597693	0	0	0.00774773	0	0	0	0	0	0	0	0	0	0	0	0	0	0	0
Proteobacteria	Alphaproteobacteria	unclassified (derived from Alphaproteobacteria)	unclassified (derived from Alphaproteobacteria)	Candidatus Pelagibacter	0.000806738	0.00182277	0.560919	0.69316	0	0	0	0	0	0	0.0169415	0	0	0	0	0	0	0	0	0	0	0	0	0	0	0	0	0	0	0.00774773	0	0	0.0378215	0	0	0	0	0	0	0	0	0	0	0	0
Proteobacteria	Gammaproteobacteria	Pasteurellales	Pasteurellaceae	Haemophilus	0.0938821	0.129984	0.562061	0.693209	0	0.0169635	0	0	0	0.0841279	0.0282358	0.0244948	0.0238949	0.0206313	0.00674536	0	0	0.181324	0.796813	0.749064	0.0392311	0	0	0	0	0.322849	0.0896539	0.204548	0.163208	0.302162	0.769579	0.224719	0.113464	0.0262605	0	0	0	0	0	0	0	0	0.0313808	0	0.146735
Proteobacteria	Epsilonproteobacteria	unclassified (derived from Epsilonproteobacteria)	unclassified (derived from Epsilonproteobacteria)	Sulfurovum	0.000911328	0.00163511	0.563333	0.693418	0	0	0	0	0	0	0.00564717	0	0	0	0.0134907	0	0	0	0	0	0	0	0	0	0	0	0.00597693	0	0.0116577	0.0232432	0	0	0	0	0	0	0	0	0	0	0	0	0	0	0
Nitrospirae	Nitrospira (class)	Nitrospirales	Nitrospiraceae	Thermodesulfovibrio	0.000806738	0.000309909	0.570333	0.700663	0	0	0	0	0	0	0.0169415	0	0	0	0	0	0	0	0	0	0	0	0	0	0	0	0	0	0	0.00774773	0	0	0	0	0	0	0	0	0	0	0	0	0	0	0
Bacteroidetes	Flavobacteriia	Flavobacteriales	unclassified (derived from Flavobacteriales)	unclassified (derived from Flavobacteriales)	0.00617692	0.00349686	0.571735	0.701017	0	0	0	0	0	0	0.0903546	0.0122474	0	0.00687711	0.0202361	0	0	0	0	0	0	0	0	0	0	0.0104145	0	0.0120322	0.0116577	0.0154955	0	0	0.0378215	0	0	0	0	0	0	0	0	0	0	0	0
Proteobacteria	Gammaproteobacteria	Enterobacteriales	Enterobacteriaceae	Pantoea	0.0381889	0.0538713	0.577092	0.706208	0	0.0508906	0	0	0	0.0841279	0.067766	0.0367422	0.0716846	0.0962795	0.0876897	0	0	0.271985	0	0	0.0196155	0	0.015186	0	0	0.041658	0.0239077	0	0.0233155	0.0619819	0.181077	0	0.113464	0	0	0	0	0	0.0482102	0	0	0	0.0209205	0	0
Proteobacteria	Betaproteobacteria	Gallionellales	Gallionellaceae	Sideroxydans	0.0156183	0.0253248	0.588871	0.719223	0	0	0	0	0	0	0.0282358	0	0	0.00687711	0.00674536	0.255754	0	0	0	0	0	0	0.0303721	0	0	0.020829	0.0179308	0.0240645	0.0349732	0.0619819	0.0452694	0.0321027	0.0378215	0	0	0.0244439	0	0	0	0	0	0	0	0	0
Firmicutes	Clostridia	Clostridiales	Eubacteriaceae	Anaerofustis	0.000583209	0.00110111	0.59425	0.724386	0	0	0	0	0	0	0	0.0122474	0	0	0	0	0	0	0	0	0	0	0	0	0	0	0	0.0120322	0	0.0154955	0	0	0	0	0	0	0	0	0	0	0	0	0	0	0
Bacteroidetes	Flavobacteriia	Flavobacteriales	Flavobacteriaceae	Maribacter	0.00581569	0.00340517	0.59701	0.726343	0	0.00848176	0	0	0	0	0.0847075	0	0	0.0137542	0	0	0	0	0	0	0	0	0.015186	0	0	0	0	0.0240645	0	0.0232432	0	0	0.0378215	0	0	0	0	0	0	0	0	0	0	0	0
Firmicutes	Bacilli	Lactobacillales	Aerococcaceae	Aerococcus	0.00455181	0.00692387	0.598927	0.727268	0	0	0	0	0.0272554	0.0560852	0	0.0122474	0	0	0	0	0	0	0	0	0	0	0	0	0	0	0	0.0360967	0.0349732	0	0	0.0642055	0.0378215	0	0	0	0	0	0	0	0	0	0	0	0
Proteobacteria	Deltaproteobacteria	Desulfobacterales	Desulfobulbaceae	Desulfobulbus	0.000670888	0.00124253	0.598952	0.725897	0	0	0	0	0	0	0	0.0061237	0.00796495	0	0	0	0	0	0	0	0	0	0	0	0	0	0	0	0.0233155	0.00774773	0	0	0	0	0	0	0	0	0	0	0	0	0	0	0
Chlorobi	Chlorobia	Chlorobiales	Chlorobiaceae	Prosthecochloris	0.00171912	0.000978234	0.603362	0.729835	0	0.0169635	0	0	0	0	0.00564717	0	0	0	0.0134907	0	0	0	0	0	0	0	0	0	0	0	0	0	0	0	0	0	0	0	0	0	0	0	0	0	0	0	0	0	0.0244559
Firmicutes	Negativicutes	Selenomonadales	Veillonellaceae	Selenomonas	0.0137856	0.00726956	0.607588	0.733537	0	0.00848176	0	0	0	0	0.00564717	0.0061237	0	0	0.0134907	0.255754	0	0	0	0	0	0	0	0	0	0.020829	0.0179308	0.0240645	0.0116577	0	0	0.0642055	0.0378215	0	0	0	0	0	0	0	0	0	0.00523013	0	0
Proteobacteria	Betaproteobacteria	Neisseriales	Neisseriaceae	Kingella	0.155381	0.0992613	0.615247	0.741361	0	0	0	0	0	0	0	0	0	0	0	0.511509	2.08333	0	0	0	0	0	0	0.668151	0	0.239533	0.119539	0.180484	0.186524	0.302162	0.814848	0.192616	0.340393	0	0	0	0	0	0	0	0.0372763	0	0	0	0
Actinobacteria	Actinobacteria (class)	Actinomycetales	Streptomycetaceae	Kitasatospora	0.000723144	0.0013492	0.615865	0.740687	0	0	0	0	0	0	0	0	0	0	0	0	0	0	0	0	0	0	0.015186	0	0	0.0104145	0	0	0.0233155	0	0	0	0	0	0	0	0	0	0	0	0	0	0	0	0
Proteobacteria	Betaproteobacteria	Neisseriales	Neisseriaceae	Lutiella	0.0156186	0.0236222	0.619934	0.744157	0	0	0	0	0	0	0	0	0	0	0	0	0.297619	0	0	0	0	0	0.0303721	0	0	0.0937305	0.0298846	0.0601612	0.0349732	0.0619819	0.0905387	0.0642055	0	0	0.0340136	0	0	0	0	0	0	0	0	0.121065	0
Firmicutes	Negativicutes	Selenomonadales	Veillonellaceae	Dialister	0.00888052	0.0116539	0.626926	0.751117	0	0.0424088	0	0	0	0	0.033883	0.0428659	0.0398248	0.0275084	0	0	0	0	0	0	0	0	0	0	0	0.020829	0	0.0240645	0.0466309	0.0232432	0	0.0642055	0.0378215	0	0	0	0	0	0	0	0.0745527	0	0	0	0
Planctomycetes	Planctomycetia	Planctomycetales	Planctomycetaceae	Pirellula	0.00129738	0.00230774	0.628586	0.751674	0	0	0	0	0	0	0	0	0	0.0137542	0.0134907	0	0	0	0	0	0	0	0	0	0	0	0.00597693	0	0	0.0464864	0	0	0	0	0	0	0	0	0	0	0	0	0.00523013	0	0
Firmicutes	Negativicutes	Selenomonadales	Acidaminococcaceae	Phascolarctobacterium	0.00244752	0.0042446	0.630509	0.752544	0	0	0	0	0	0	0.0169415	0.0061237	0.00796495	0.00687711	0.0134907	0	0	0	0	0	0	0	0	0	0	0	0.00597693	0.0120322	0	0	0	0	0	0	0	0	0	0	0	0	0	0	0	0	0
Bacteroidetes	Flavobacteriia	Flavobacteriales	Flavobacteriaceae	Chryseobacterium	0.0219419	0.030216	0.631686	0.75252	0	0.0254453	0	0	0.0272554	0	0.0734131	0.0306185	0	0	0.0134907	0.255754	0	0	0	0	0.0196155	0	0.015186	0	0	0.020829	0.0179308	0.048129	0.0116577	0.0387387	0	0.0321027	0.075643	0	0	0	0	0	0	0	0	0	0.0104603	0.242131	0
Firmicutes	Clostridia	Clostridiales	Heliobacteriaceae	Heliobacterium	0.0120909	0.0151811	0.634417	0.754344	0	0.0424088	0	0	0.0545108	0	0.0395302	0.0183711	0.0318598	0.0206313	0.0269815	0	0	0	0	0	0.0196155	0	0	0	0	0.0520725	0.0239077	0.0842257	0.0699464	0.0232432	0	0.0642055	0.0378215	0	0	0	0	0	0.0241051	0	0	0	0	0	0
Firmicutes	Bacilli	Lactobacillales	Aerococcaceae	Eremococcus	0.0274527	0.0183291	0.641284	0.761071	0	0.0424088	0	0	0.0272554	0	0.0282358	0.0367422	0.0398248	0.0275084	0	0	0	0	0	0.374532	0	0	0	0	0	0.020829	0.00597693	0.0240645	0.0466309	0.0154955	0.181077	0.0642055	0.0378215	0	0	0	0	0	0	0	0.0621272	0	0	0	0
Spirochaetes	Spirochaetia	Spirochaetales	Leptospiraceae	Leptospira	0.00391309	0.00267334	0.642429	0.760994	0	0	0	0	0	0	0.0282358	0.0122474	0.00796495	0	0.0337268	0	0	0	0	0	0	0	0	0	0	0	0.00597693	0	0.0116577	0.0387387	0	0	0	0	0	0	0	0	0	0	0	0	0.0104603	0	0
Proteobacteria	Betaproteobacteria	Rhodocyclales	Rhodocyclaceae	Azoarcus	0.0247633	0.0342642	0.65446	0.773789	0	0	0	0	0	0	0.0112943	0	0	0	0	0	0	0	0	0	0.235386	0	0.273349	0	0	0.0937305	0.113562	0.0721935	0.0466309	0.178198	0.226347	0	0	0	0	0	0	0	0	0.125945	0	0	0	0	0
Proteobacteria	Alphaproteobacteria	Rhodobacterales	Hyphomonadaceae	Hyphomonas	0.0023372	0.00323837	0.654522	0.77241	0	0	0	0	0	0	0.0225887	0	0	0.00687711	0	0	0	0	0	0	0.0196155	0	0	0	0	0.0104145	0.0119539	0.0120322	0.0233155	0.0232432	0	0	0	0	0	0	0	0	0	0	0	0	0	0	0
Bacteroidetes	Sphingobacteriia	Sphingobacteriales	Sphingobacteriaceae	Pedobacter	0.0327514	0.0241066	0.658993	0.776229	0	0.0254453	0	0	0	0	0.33883	0.0183711	0.0398248	0.116911	0.148398	0	0	0	0	0	0	0	0	0	0	0.0104145	0.00597693	0.0601612	0.0233155	0.00774773	0	0.128411	0.0378215	0	0	0	0	0	0	0	0	0	0.00523013	0	0.0978234
Spirochaetes	Spirochaetia	Spirochaetales	Brachyspiraceae	Brachyspira	0.000992057	0.00144686	0.662421	0.778809	0	0	0	0	0	0	0.00564717	0	0	0	0	0	0	0	0	0	0	0	0.015186	0	0	0.0104145	0.00597693	0.0120322	0	0.00774773	0	0	0	0	0	0	0	0	0	0	0	0	0	0	0
Deferribacteres	Deferribacteres (class)	Deferribacterales	Deferribacteraceae	Denitrovibrio	0.000327481	0.000548987	0.662622	0.777592	0	0	0	0	0	0	0	0	0	0.00687711	0	0	0	0	0	0	0	0	0	0	0	0	0.00597693	0	0	0.00774773	0	0	0	0	0	0	0	0	0	0	0	0	0	0	0
Proteobacteria	Gammaproteobacteria	Enterobacteriales	Enterobacteriaceae	Rahnella	0.0573133	0.0772895	0.663589	0.777276	0	0.0339271	0	0	0	0	0.0112943	0	0	0.00687711	0.00674536	0	0	0	0	0	0	0.699301	0	0.445434	0	0.0312435	0.0179308	0	0.0233155	0.00774773	0.0905387	0	0	0.017507	0.0340136	0.0244439	0	0.0363372	0.0241051	0	0	0.373134	0.0784519	0.242131	0
Bacteroidetes	Flavobacteriia	unclassified (derived from Flavobacteriia)	unclassified (derived from Flavobacteriia)	unclassified (derived from Flavobacteriia)	0.00478581	0.00326328	0.665724	0.778328	0	0	0	0	0	0	0.0395302	0	0	0.0137542	0.0472175	0	0	0	0	0	0	0	0	0	0	0	0	0	0.0116577	0	0	0.0321027	0.0378215	0	0	0	0	0	0	0	0	0	0	0	0
Firmicutes	Bacilli	Bacillales	unclassified (derived from Bacillales)	Gemella	0.0175634	0.0136851	0.666051	0.777266	0	0.0508906	0	0	0.0272554	0	0.0960018	0.061237	0.0716846	0.0550168	0.00674536	0	0	0	0	0	0	0	0	0	0	0.020829	0.00597693	0.0240645	0.0116577	0.0154955	0	0.0642055	0.075643	0	0	0	0	0	0	0	0.124254	0	0	0	0
Proteobacteria	Betaproteobacteria	Burkholderiales	Alcaligenaceae	Bordetella	0.0818583	0.103362	0.666555	0.776413	0	0.0169635	0	0	0	0	0.0282358	0	0	0.0137542	0.0202361	0.767263	0	0	0	0	0.568851	0	0.303721	0	0	0.124974	0.280916	0.132355	0.139893	0.333153	0.181077	0.0321027	0.075643	0.017507	0.0680272	0.0488878	0	0.25436	0.0482102	0.125945	0.0994036	0	0.0313808	0	0.171191
Firmicutes	Bacilli	Lactobacillales	Carnobacteriaceae	Granulicatella	0.017799	0.0266519	0.677207	0.787363	0	0	0	0	0.163532	0.168256	0.0282358	0	0	0.0137542	0	0	0	0	0	0	0	0	0	0	0	0.0520725	0.00597693	0.0240645	0.0233155	0.0387387	0.452694	0.0642055	0	0	0	0	0	0	0	0	0	0	0.00523013	0	0
Chlorobi	Chlorobia	Chlorobiales	Chlorobiaceae	Chloroherpeton	0.00240523	0.00335893	0.678835	0.787799	0	0	0	0	0	0	0.00564717	0.0244948	0	0.00687711	0.0134907	0	0	0	0	0	0	0	0	0	0	0	0.00597693	0.0120322	0.0349732	0.0309909	0	0	0	0	0	0	0	0	0	0	0	0	0	0	0
Proteobacteria	Alphaproteobacteria	unclassified (derived from Alphaproteobacteria)	unclassified (derived from Alphaproteobacteria)	unclassified (derived from Alphaproteobacteria)	0.0271723	0.0158089	0.68776	0.796687	0	0	0	0	0	0	0.00564717	0	0	0	0	0	0	0	0	0	0	0	0	0	0.564972	0.0104145	0.00597693	0	0.0349732	0.0232432	0	0	0.0378215	0	0	0	0	0	0	0	0	0	0	0	0.0489117
Proteobacteria	Betaproteobacteria	Burkholderiales	Oxalobacteraceae	Janthinobacterium	0.0681648	0.0884292	0.695806	0.804526	0	0	0	0	0	0.0280426	0	0	0	0	0.00674536	0.511509	0	0	0	0.374532	0.17654	0	0.334093	0	0	0.062487	0.0956309	0.0120322	0.0349732	0.162702	0.362155	0.0321027	0.151286	0	0	0	0	0	0	0.881612	0	0	0	0	0.41575
Proteobacteria	Gammaproteobacteria	Enterobacteriales	Enterobacteriaceae	Serratia	0.152266	0.122608	0.696226	0.803534	0	0.0593723	0	0	0.0545108	0.0560852	0.0790603	0.0122474	0.0557547	0.0550168	0.229342	0	0	0.861287	1.19522	0.374532	0.0588466	0	0.106302	0	0	0.020829	0.107585	0.0240645	0.0582886	0.108468	0.135808	0.0642055	0.151286	0	0.0680272	0.0733317	0	0.0363372	0.0482102	0.251889	0	0	0.172594	0.242131	0
Proteobacteria	Alphaproteobacteria	Rickettsiales	Anaplasmataceae	Ehrlichia	0.000874814	0.000482102	0.696844	0.802774	0	0	0	0	0	0	0	0.0183711	0	0	0	0	0	0	0	0	0	0	0	0	0	0	0	0	0	0	0	0	0	0	0	0	0	0	0.0120525	0	0	0	0	0	0
Bacteroidetes	Flavobacteriia	Flavobacteriales	Flavobacteriaceae	Cellulophaga	0.00449682	0.00610028	0.702649	0.807982	0	0.0339271	0	0	0	0	0.033883	0.0061237	0	0.0137542	0.00674536	0	0	0	0	0	0	0	0	0	0	0.020829	0.00597693	0.0120322	0	0	0	0.0321027	0	0	0	0	0	0	0	0	0	0	0	0	0
Proteobacteria	Alphaproteobacteria	Parvularculales	Parvularculaceae	Parvularcula	0.00185736	0.00257545	0.705601	0.809896	0	0	0	0	0	0	0.0169415	0	0	0.00687711	0	0	0	0	0	0	0	0	0.015186	0	0	0.0104145	0.00597693	0	0.0116577	0	0	0	0	0	0	0	0	0.0363372	0	0	0	0	0	0	0
Proteobacteria	Deltaproteobacteria	Desulfovibrionales	Desulfomicrobiaceae	Desulfomicrobium	0.00161557	0.00242318	0.712194	0.815974	0	0.0339271	0	0	0	0	0	0	0	0	0	0	0	0	0	0	0	0	0	0	0	0	0.0179308	0	0.0116577	0.0309909	0	0	0	0	0	0	0	0	0	0	0	0	0	0	0
Acidobacteria	Acidobacteriia	Acidobacteriales	Acidobacteriaceae	Acidobacterium	0.00387594	0.00288485	0.712885	0.815282	0	0	0	0	0	0	0.0169415	0.0428659	0.00796495	0.00687711	0.00674536	0	0	0	0	0	0	0	0	0	0	0.0312435	0.00597693	0	0.0116577	0.0232432	0	0	0	0	0	0	0	0	0	0	0	0	0	0	0
Firmicutes	Clostridia	Clostridiales	Clostridiales Family XI. Incertae Sedis	unclassified (derived from Clostridiales Family XI. Incertae Sedis)	0.0121951	0.00805348	0.714212	0.815317	0	0	0	0	0.0272554	0	0	0.0061237	0	0	0	0	0	0	0	0	0	0	0	0.222717	0	0.020829	0.00597693	0.0240645	0.0349732	0.00774773	0	0.0321027	0.075643	0	0	0	0	0	0	0	0	0	0	0	0
Proteobacteria	Gammaproteobacteria	Enterobacteriales	Enterobacteriaceae	Xenorhabdus	0.0264836	0.0203422	0.717934	0.81808	0	0.00848176	0	0	0	0	0.0225887	0.0061237	0.0398248	0.0206313	0.0202361	0	0.297619	0.0906618	0	0	0.0196155	0	0.0303721	0	0	0	0.0119539	0.0240645	0.0116577	0.0774773	0.135808	0.0963082	0.151286	0	0	0	0	0	0	0	0	0	0	0	0
Proteobacteria	Alphaproteobacteria	Rhizobiales	Beijerinckiaceae	Methylocella	0.00165722	0.00114307	0.724439	0.824001	0	0	0	0	0	0	0	0	0	0	0	0	0	0	0	0	0.0196155	0	0.015186	0	0	0.020829	0	0	0	0.00774773	0	0	0	0	0	0	0	0	0	0	0	0	0	0	0
Proteobacteria	Deltaproteobacteria	Desulfovibrionales	Desulfovibrionaceae	Desulfovibrio	0.0537502	0.0686703	0.724772	0.822891	0	0.00848176	0	0	0	0	0.0282358	0.0122474	0	0	0.0134907	0	0.297619	0	0	0.749064	0.0196155	0	0	0	0	0.0729015	0.0478154	0.0601612	0.128235	0.0619819	0.0905387	0.0642055	0.151286	0.017507	0	0.0977756	0	0	0.0241051	0	0	0	0.0366109	0	0.0489117
Synergistetes	Synergistia	Synergistales	Synergistaceae	Pyramidobacter	0.00122562	0.0017654	0.736874	0.835124	0	0	0	0	0	0	0	0.0122474	0	0	0.0134907	0	0	0	0	0	0	0	0	0	0	0	0	0.0120322	0	0	0	0.0321027	0	0	0	0	0	0	0	0	0	0	0	0	0
Proteobacteria	Gammaproteobacteria	Cardiobacteriales	Cardiobacteriaceae	Dichelobacter	0.0746199	0.0588228	0.746548	0.844566	0	0	0	0	0	0	0	0	0	0	0	0	0.595238	0	0	0.749064	0	0	0	0.222717	0	0.020829	0.0597693	0.0842257	0.10492	0.139459	0.316885	0.128411	0.226929	0.0087535	0	0	0	0	0	0	0	0	0.0156904	0	0.0244559
Firmicutes	Clostridia	Clostridiales	Lachnospiraceae	Roseburia	0.00306034	0.00399397	0.753773	0.851208	0	0	0	0	0	0	0.0169415	0.0122474	0.00796495	0.00687711	0.0202361	0	0	0	0	0	0	0	0	0	0	0	0.0119539	0.0120322	0.0116577	0	0	0.0642055	0	0	0	0	0	0	0	0	0	0	0	0	0
Proteobacteria	Betaproteobacteria	Burkholderiales	unclassified (derived from Burkholderiales)	Methylibium	0.0528026	0.0403961	0.754946	0.851006	0	0	0	0	0	0	0.0112943	0	0	0	0	0.767263	0	0	0	0	0.117693	0	0.212604	0	0	0.041658	0.113562	0.048129	0.0816041	0.216937	0.0905387	0.0642055	0.0378215	0	0	0	0	0	0	0	0	0	0	0	0
Proteobacteria	Gammaproteobacteria	Enterobacteriales	Enterobacteriaceae	Pectobacterium	0.0596677	0.048458	0.760074	0.855253	0	0.0169635	0	0	0	0	0.0225887	0	0.0318598	0.0206313	0.107926	0	0	0.589302	0	0.374532	0.0588466	0	0.0303721	0	0	0.041658	0.0478154	0.0721935	0.0233155	0.108468	0.135808	0	0.075643	0	0	0.0488878	0.389105	0	0	0	0	0	0	0	0
Proteobacteria	Gammaproteobacteria	Enterobacteriales	Enterobacteriaceae	Sodalis	0.0134763	0.0105545	0.762579	0.856539	0	0.00848176	0	0	0	0	0.0169415	0.0183711	0.0238949	0.0137542	0.0202361	0	0	0.181324	0	0	0	0	0	0	0	0.0104145	0.0298846	0.048129	0.0116577	0.0619819	0	0	0.075643	0	0	0	0	0	0	0	0	0	0.0261506	0	0
Firmicutes	Bacilli	Bacillales	Alicyclobacillaceae	Alicyclobacillus	0.00139686	0.0010153	0.762694	0.855142	0	0	0	0	0	0	0.0225887	0	0	0	0.00674536	0	0	0	0	0	0	0	0	0	0	0	0.00597693	0	0.0116577	0.00774773	0	0	0	0	0	0	0	0	0	0	0	0	0	0	0
Elusimicrobia	Elusimicrobia (class)	Elusimicrobiales	Elusimicrobiaceae	Elusimicrobium	0.000268913	0.00041658	0.767391	0.858877	0	0	0	0	0	0	0.00564717	0	0	0	0	0	0	0	0	0	0	0	0	0	0	0.0104145	0	0	0	0	0	0	0	0	0	0	0	0	0	0	0	0	0	0	0
Firmicutes	Clostridia	Clostridiales	Lachnospiraceae	Oribacterium	0.0135141	0.00966102	0.769884	0.860136	0	0	0	0	0	0.0280426	0	0	0	0	0	0.255754	0	0	0	0	0	0	0	0	0	0	0	0	0.0466309	0.0154955	0.0452694	0.0963082	0.0378215	0	0	0	0	0	0	0	0	0	0	0	0
Firmicutes	Bacilli	Bacillales	Bacillaceae	Oceanobacillus	0.00589637	0.00734444	0.770616	0.859428	0	0	0	0	0.0272554	0.0560852	0.0282358	0.0122474	0	0	0	0	0	0	0	0	0	0	0	0	0	0.0104145	0.0179308	0.0360967	0.0233155	0.00774773	0	0	0	0	0	0	0	0	0	0	0	0	0	0	0
Proteobacteria	Alphaproteobacteria	Rhodospirillales	Acetobacteraceae	Gluconobacter	0.00165722	0.00229206	0.772737	0.860269	0	0	0	0	0	0	0	0	0	0	0	0	0	0	0	0	0.0196155	0	0.015186	0	0	0	0	0.0120322	0	0	0.0452694	0	0	0	0	0	0	0	0	0	0	0	0	0	0
Bacteroidetes	unclassified (derived from Bacteroidetes)	Bacteroidetes Order II. Incertae sedis	Rhodothermaceae	Salinibacter	0.00317977	0.00245291	0.777498	0.864039	0	0	0	0	0	0	0.0395302	0	0	0.0137542	0.0134907	0	0	0	0	0	0	0	0	0	0	0	0.00597693	0	0	0.0232432	0	0.0321027	0	0	0	0	0	0	0	0	0	0	0	0	0
Proteobacteria	Alphaproteobacteria	Rhizobiales	Hyphomicrobiaceae	Rhodomicrobium	0.000934073	0.000619819	0.780841	0.866224	0	0	0	0	0	0	0	0	0	0	0	0	0	0	0	0	0.0196155	0	0	0	0	0	0	0	0	0.0154955	0	0	0	0	0	0	0	0	0	0	0	0	0	0	0
Proteobacteria	Gammaproteobacteria	Enterobacteriales	Enterobacteriaceae	Dickeya	0.0309981	0.0380646	0.781226	0.865125	0	0.00848176	0	0	0	0	0.0169415	0.0061237	0.0318598	0.0343855	0.0337268	0	0	0.0906618	0.398406	0	0	0	0.0303721	0	0	0.041658	0.0179308	0.0120322	0.0233155	0.0542341	0.0452694	0	0.0378215	0	0	0.0977756	0	0	0	0	0	0	0	0	0.0244559
Bacteroidetes	Cytophagia	Cytophagales	Cytophagaceae	Microscilla	0.0104553	0.0128634	0.791384	0.874834	0	0	0	0	0	0	0.0395302	0.0061237	0.0318598	0.0206313	0.121417	0	0	0	0	0	0	0	0	0	0	0	0	0.0120322	0.0116577	0	0	0.0963082	0.075643	0	0	0	0	0	0	0.125945	0	0	0	0	0
Proteobacteria	Betaproteobacteria	Burkholderiales	unclassified (derived from Burkholderiales)	Leptothrix	0.00238036	0.00299565	0.79228	0.874288	0	0	0	0	0	0	0	0	0	0	0	0	0	0	0	0	0.0196155	0	0.0303721	0	0	0	0	0	0.0116577	0.00774773	0	0	0	0	0	0	0	0	0.0241051	0	0	0	0.0313808	0	0
Firmicutes	Clostridia	Clostridiales	Ruminococcaceae	Subdoligranulum	0.000904417	0.00128411	0.793566	0.874173	0	0	0	0	0	0	0	0.0122474	0	0	0.00674536	0	0	0	0	0	0	0	0	0	0	0	0	0	0	0	0	0.0321027	0	0	0	0	0	0	0	0	0	0	0	0	0
Chlorobi	Chlorobia	Chlorobiales	Chlorobiaceae	Pelodictyon	0.0023459	0.0018331	0.793758	0.872856	0	0.0254453	0	0	0	0	0.0169415	0	0	0.00687711	0	0	0	0	0	0	0	0	0	0	0	0	0.00597693	0	0	0.00774773	0	0.0321027	0	0	0	0	0	0	0	0	0	0	0	0	0
Firmicutes	Bacilli	Bacillales	Planococcaceae	Planococcus	0.00133536	0.000947599	0.796197	0.87401	0	0	0	0	0	0.0280426	0	0	0	0	0	0	0	0	0	0	0	0	0	0	0	0	0	0.0120322	0.0116577	0	0	0	0	0	0	0	0	0	0	0	0	0	0	0	0
Proteobacteria	Alphaproteobacteria	Rhodospirillales	Rhodospirillaceae	Rhodospirillum	0.0179076	0.0140255	0.796441	0.872755	0	0	0	0	0	0	0.0112943	0	0.00796495	0.00687711	0.00674536	0	0.297619	0	0	0	0	0	0.0455581	0	0	0.041658	0.0358616	0.0842257	0.0466309	0.0387387	0.0452694	0.0321027	0	0	0	0	0	0	0	0	0	0	0.0261506	0	0
Verrucomicrobia	Verrucomicrobiae	Verrucomicrobiales	unclassified (derived from Verrucomicrobiales)	unclassified (derived from Verrucomicrobiales)	0.000648689	0.00048129	0.800045	0.87518	0	0	0	0	0	0	0	0	0	0.00687711	0.00674536	0	0	0	0	0	0	0	0	0	0	0	0	0.0120322	0	0	0	0	0	0	0	0	0	0	0	0	0	0	0	0	0
Proteobacteria	Deltaproteobacteria	Desulfuromonadales	Desulfuromonadaceae	Desulfuromonas	0.00553903	0.00450523	0.800292	0.87393	0	0	0	0	0	0.0280426	0.0282358	0	0.00796495	0	0.00674536	0	0	0.0453309	0	0	0	0	0	0	0	0.0312435	0	0	0.0116577	0.0697296	0	0	0	0	0	0	0	0	0	0	0	0	0	0	0
Firmicutes	Bacilli	Bacillales	Bacillaceae	Anoxybacillus	0.00384387	0.00456068	0.810287	0.883311	0	0.00848176	0	0	0.0272554	0	0.00564717	0.0244948	0.00796495	0.00687711	0	0	0	0	0	0	0	0	0	0	0	0.020829	0	0.0360967	0.0466309	0	0	0	0	0	0	0	0	0	0	0	0	0	0.0104603	0	0
Firmicutes	Erysipelotrichi	Erysipelotrichales	Erysipelotrichaceae	unclassified (derived from Erysipelotrichaceae)	0.00860994	0.0102583	0.814073	0.885903	0	0.0169635	0	0	0	0.0841279	0.0112943	0.0183711	0.0159299	0.0206313	0.0134907	0	0	0	0	0	0	0	0	0	0	0.0312435	0.0119539	0.0120322	0.10492	0	0	0.0963082	0	0	0	0	0	0	0	0	0	0	0	0	0
Bacteroidetes	unclassified (derived from Bacteroidetes)	Bacteroidetes Order II. Incertae sedis	Rhodothermaceae	Rhodothermus	0.00367251	0.0042623	0.821796	0.892763	0	0	0	0	0	0	0.0112943	0.0306185	0.00796495	0.0137542	0.0134907	0	0	0	0	0	0	0	0	0	0	0	0.0119539	0.0120322	0.0349732	0.0154955	0	0.0321027	0	0	0	0	0	0	0	0	0	0	0	0	0
Firmicutes	Clostridia	Thermoanaerobacterales	Thermoanaerobacterales Family III. Incertae Sedis	Thermosediminibacter	0.000327481	0.000239077	0.828571	0.898571	0	0	0	0	0	0	0	0	0	0.00687711	0	0	0	0	0	0	0	0	0	0	0	0	0.00597693	0	0	0	0	0	0	0	0	0	0	0	0	0	0	0	0	0	0
Proteobacteria	Betaproteobacteria	Neisseriales	Neisseriaceae	Simonsiella	0.149026	0.173698	0.828746	0.897214	0	0	0	0	0	0	0	0	0	0	0	0.511509	1.4881	0	0	0	0	0	0	0	1.12994	0.20829	0.1554	0.204548	0.221497	0.255675	0.67904	0.0642055	0.302572	0	0.204082	0	0	0	0	0	0	0.373134	0	0	0
Firmicutes	Bacilli	Lactobacillales	Lactobacillaceae	Lactobacillus	2.85166	2.33848	0.833695	0.901021	2.94118	0.466497	0	0	1.82611	2.41167	0.480009	0.459277	0.517722	44.2886	1.19393	0.255754	2.08333	0	0	1.1236	0.0392311	0	0	0.668151	1.12994	0.249948	0.209193	0.360967	0.442994	0.185946	0.995926	0.642055	0.302572	0.087535	0.102041	0.928868	15.5642	0.944767	0.180788	1.51134	1.67744	0	28.4571	2.05811	0.660308
Cyanobacteria	unclassified (derived from Cyanobacteria)	Nostocales	Nostocaceae	Nodularia	0.000403894	0.000519114	0.833716	0.899498	0	0.00848176	0	0	0	0	0	0	0	0	0	0	0	0	0	0	0	0	0	0	0	0	0	0	0	0.00774773	0	0	0	0	0	0	0	0	0	0	0	0	0.00523013	0	0
Bacteroidetes	Flavobacteriia	Flavobacteriales	Flavobacteriaceae	Weeksella	0.000923875	0.0011717	0.834647	0.89896	0	0	0	0	0	0	0.00564717	0	0	0.0137542	0	0	0	0	0	0	0	0	0	0	0	0	0.00597693	0	0.0233155	0	0	0	0	0	0	0	0	0	0	0	0	0	0	0	0
Proteobacteria	Alphaproteobacteria	Rhizobiales	Aurantimonadaceae	Fulvimarina	0.0121788	0.00946771	0.835198	0.898016	0	0	0	0	0	0	0	0	0	0	0	0.255754	0	0	0	0	0	0	0	0	0	0.041658	0.0179308	0.0360967	0.0349732	0.0154955	0.0905387	0	0	0	0	0	0	0	0	0	0	0	0	0	0
Proteobacteria	Gammaproteobacteria	Chromatiales	Ectothiorhodospiraceae	Nitrococcus	0.00120299	0.000929728	0.838857	0.900412	0	0	0	0	0	0	0.00564717	0	0	0	0	0	0	0	0	0	0.0196155	0	0	0	0	0	0	0	0	0.0232432	0	0	0	0	0	0	0	0	0	0	0	0	0	0	0
Proteobacteria	Alphaproteobacteria	Rhizobiales	Xanthobacteraceae	Azorhizobium	0.0194715	0.0228634	0.851972	0.912931	0	0	0	0	0	0	0	0	0	0.00687711	0	0	0.297619	0	0	0	0.0588466	0	0.0455581	0	0	0.041658	0.0777001	0.0360967	0.0116577	0.0309909	0	0	0	0.0262605	0.0680272	0	0	0	0	0	0	0	0	0	0
Lentisphaerae	unclassified (derived from Lentisphaerae)	Lentisphaerales	Lentisphaeraceae	Lentisphaera	0.000321208	0.00041658	0.856984	0.91674	0	0	0	0	0	0	0	0	0	0	0.00674536	0	0	0	0	0	0	0	0	0	0	0.0104145	0	0	0	0	0	0	0	0	0	0	0	0	0	0	0	0	0	0	0
Firmicutes	Clostridia	Clostridiales	Clostridiaceae	Clostridium	0.359281	0.384647	0.858235	0.916519	0	0.262935	0	0	0.872172	0.420639	0.333183	0.244948	0.215054	0.158173	0.215852	0.255754	1.4881	0	1.19522	0	0.0392311	0	0.0455581	0.668151	1.12994	0.635284	0.400454	1.07087	1.24738	0.371891	1.26754	1.54093	1.059	0	0	0.0244439	0	0	0	0	0.0869781	1.1194	0.0209205	0.242131	0.0733676
Acidobacteria	Acidobacteriia	Acidobacteriales	Acidobacteriaceae	Terriglobus	0.00170424	0.00141391	0.859362	0.916167	0	0	0	0	0	0	0.0112943	0.0244948	0	0	0	0	0	0	0	0	0	0	0	0	0	0	0	0.0120322	0.0233155	0	0	0	0	0	0	0	0	0	0	0	0	0	0	0	0
Verrucomicrobia	unclassified (derived from Verrucomicrobia)	Methylacidiphilales	Methylacidiphilaceae	Methylacidiphilum	0.000379284	0.00048129	0.868569	0.924416	0	0	0	0	0	0	0	0	0.00796495	0	0	0	0	0	0	0	0	0	0	0	0	0	0	0.0120322	0	0	0	0	0	0	0	0	0	0	0	0	0	0	0	0	0
Chlorobi	Chlorobia	Chlorobiales	Chlorobiaceae	Chlorobaculum	0.00478409	0.00528284	0.869516	0.923861	0	0	0	0	0	0	0.033883	0.0183711	0.00796495	0.0206313	0	0	0	0	0	0	0.0196155	0	0	0	0	0	0.0179308	0.0360967	0.0233155	0.00774773	0	0.0321027	0	0	0	0	0	0	0	0	0	0	0	0	0
Proteobacteria	Alphaproteobacteria	Rhodobacterales	Hyphomonadaceae	Maricaulis	0.00187378	0.00213437	0.874876	0.927988	0	0	0	0	0	0	0.0112943	0.0061237	0	0	0.00674536	0	0	0	0	0	0	0	0.015186	0	0	0.0104145	0.0119539	0	0	0.0309909	0	0	0	0	0	0	0	0	0	0	0	0	0	0	0
Firmicutes	Bacilli	Lactobacillales	Leuconostocaceae	Leuconostoc	0.0364696	0.0401502	0.87984	0.931683	0	0.0424088	0	0	0.0817661	0.196298	0.327536	0.0244948	0.0318598	0.0412626	0.0202361	0	0	0	0	0	0	0	0	0	0	0.0312435	0.00597693	0.0360967	0.0116577	0.0387387	0.181077	0.0321027	0.0378215	0	0	0.0244439	0.389105	0	0	0	0.0745527	0	0.0104603	0	0.0489117
Bacteroidetes	Flavobacteriia	Flavobacteriales	Flavobacteriaceae	Zunongwangia	0.00160153	0.0013492	0.880357	0.930663	0	0	0	0	0	0	0	0.0061237	0	0.0275084	0	0	0	0	0	0	0	0	0	0	0	0.0104145	0	0	0.0233155	0	0	0	0	0	0	0	0	0	0	0	0	0	0	0	0
Proteobacteria	Betaproteobacteria	Nitrosomonadales	Nitrosomonadaceae	Nitrosomonas	0.0249102	0.0275199	0.895506	0.94509	0	0.00848176	0	0	0	0	0.00564717	0	0	0.00687711	0.0472175	0	0	0	0	0.374532	0.0196155	0	0.0607441	0	0	0.0520725	0.0597693	0.048129	0.0349732	0.0697296	0	0.0642055	0	0.0087535	0	0	0	0	0	0	0	0	0.0104603	0	0.0244559
Bacteroidetes	Sphingobacteriia	Sphingobacteriales	Sphingobacteriaceae	Sphingobacterium	0.00984008	0.0106283	0.919391	0.968672	0	0.00848176	0	0	0	0	0.0903546	0	0.0398248	0.0275084	0.0404722	0	0	0	0	0	0	0	0	0	0	0.020829	0	0	0.0116577	0.0232432	0	0.128411	0	0	0	0	0	0	0	0	0	0	0	0	0
Proteobacteria	Gammaproteobacteria	Alteromonadales	Psychromonadaceae	Psychromonas	0.00472112	0.00426658	0.926159	0.974171	0	0.00848176	0	0	0	0	0	0	0	0	0	0	0	0.0906618	0	0	0	0	0	0	0	0	0	0.0240645	0.0116577	0.0464864	0	0	0	0	0	0	0	0	0	0	0	0	0	0	0.0244559
Spirochaetes	Spirochaetia	Spirochaetales	unclassified (derived from Spirochaetales)	unclassified (derived from Spirochaetales)	0.000268913	0.000239077	0.93431	0.981103	0	0	0	0	0	0	0.00564717	0	0	0	0	0	0	0	0	0	0	0	0	0	0	0	0.00597693	0	0	0	0	0	0	0	0	0	0	0	0	0	0	0	0	0	0
Proteobacteria	Gammaproteobacteria	Pseudomonadales	Pseudomonadaceae	Pseudomonas	1.05689	1.10533	0.93599	0.981229	0	0.169635	0	0	0	0	0.033883	0.0122474	0.0398248	0.0550168	0.0674536	2.8133	4.46429	0.181324	0.796813	0.749064	1.00039	4.1958	0.971906	1.55902	5.08475	0.687357	0.968263	0.48129	0.442994	12.5281	1.0412	0.224719	0.529501	0.35014	0.408163	0.953312	1.55642	0.399709	0.313366	0.377834	0.186382	0.746269	0.899582	1.21065	0.269014
Proteobacteria	Alphaproteobacteria	Rhodospirillales	Rhodospirillaceae	Magnetospirillum	0.0314476	0.0327871	0.949193	0.993415	0	0.00848176	0	0	0	0	0	0	0	0.0137542	0	0.255754	0.297619	0	0	0	0.0392311	0	0.0455581	0	0	0.083316	0.0298846	0.096258	0.0582886	0.123964	0	0	0.189107	0	0	0	0	0	0.0361576	0.125945	0	0	0.0523013	0	0.0244559
Proteobacteria	Epsilonproteobacteria	Campylobacterales	Campylobacteraceae	Campylobacter	0.010497	0.0108591	0.950683	0.993322	0	0.00848176	0	0	0	0.0280426	0.0451773	0.0489896	0.0557547	0.0137542	0.0202361	0	0	0	0	0	0	0	0	0	0	0.0312435	0.00597693	0.0240645	0.0582886	0.0309909	0.0452694	0	0.075643	0	0	0	0	0	0	0	0	0	0	0	0
Verrucomicrobia	Verrucomicrobiae	Verrucomicrobiales	Verrucomicrobiaceae	Akkermansia	0.000998369	0.000932618	0.951906	0.99295	0	0	0	0	0	0	0	0.0061237	0.00796495	0.00687711	0	0	0	0	0	0	0	0	0	0	0	0	0	0	0.0233155	0	0	0	0	0	0	0	0	0	0	0	0	0	0	0	0
Proteobacteria	Alphaproteobacteria	Rhizobiales	Phyllobacteriaceae	Parvibaculum	0.00502964	0.0052623	0.956526	0.996117	0	0	0	0	0	0	0.00564717	0	0	0	0	0	0	0	0	0	0.0392311	0	0.0607441	0	0	0.0520725	0.00597693	0.0120322	0	0.0387387	0	0	0	0.017507	0	0	0	0	0	0	0	0	0.00523013	0	0
Proteobacteria	Alphaproteobacteria	Rhizobiales	Hyphomicrobiaceae	Hyphomicrobium	0.00198411	0.00191018	0.972506	1.01109	0	0	0	0	0	0	0.0112943	0	0	0	0	0	0	0	0	0	0	0	0.0303721	0	0	0	0	0.0360967	0.0116577	0	0	0	0	0	0	0	0	0	0	0	0	0	0	0	0
Proteobacteria	Betaproteobacteria	Burkholderiales	unclassified (derived from Burkholderiales)	Thiomonas	0.0130922	0.0134084	0.978852	1.016	0	0	0	0	0	0	0.0112943	0.0061237	0	0	0	0	0	0	0	0	0.0196155	0	0.015186	0.222717	0	0.020829	0.0239077	0.0120322	0.0116577	0.0309909	0	0	0	0	0	0	0	0	0	0	0	0	0.00523013	0	0.0978234
Proteobacteria	Deltaproteobacteria	Myxococcales	Cystobacteraceae	Stigmatella	0.001776	0.00180649	0.981689	1.01727	0	0	0	0	0	0	0.0112943	0.0122474	0	0.0137542	0	0	0	0	0	0	0	0	0	0	0	0	0.00597693	0.0120322	0.0116577	0.0154955	0	0	0	0	0	0	0	0	0	0	0	0	0	0	0
Firmicutes	Clostridia	Clostridiales	Lachnospiraceae	Butyrivibrio	0.00341247	0.00336866	0.987138	1.02123	0	0	0	0	0	0.0280426	0	0.0367422	0	0.00687711	0	0	0	0	0	0	0	0	0	0	0	0.0104145	0.00597693	0.0240645	0.0116577	0	0	0.0321027	0	0	0	0	0	0	0	0	0	0	0	0	0
Actinobacteria	Actinobacteria (class)	Actinomycetales	Tsukamurellaceae	Tsukamurella	0.0334535	0.0330951	0.988965	1.02144	0	0	0	0	0	0	0	0	0	0	0	0	0.297619	0	0	0.374532	0	0	0.0303721	0	0	0.197875	0.101608	0.0721935	0.186524	0.0387387	0	0.192616	0.0378215	0	0	0	0	0	0	0	0	0	0	0	0
Proteobacteria	Deltaproteobacteria	Bdellovibrionales	Bdellovibrionaceae	Bdellovibrio	0.00623729	0.00625683	0.997641	1.02871	0	0	0	0	0	0	0.124238	0	0	0	0.00674536	0	0	0	0	0	0	0	0	0	0	0.020829	0.0119539	0.0120322	0.0582886	0.0154955	0	0	0.0378215	0	0	0	0	0	0	0	0	0	0	0	0
Proteobacteria	Gammaproteobacteria	Enterobacteriales	Enterobacteriaceae	Edwardsiella	0.0163976	0.0164153	0.998424	1.02784	0	0.0169635	0	0	0	0.0280426	0.0282358	0.0061237	0.0637196	0.0412626	0.114671	0	0	0.0453309	0	0	0	0	0	0	0	0.020829	0	0.0120322	0.0116577	0.0542341	0.0452694	0	0	0	0	0	0	0.0363372	0.0120525	0.125945	0	0	0.0104603	0	0
Gemmatimonadetes	Gemmatimonadetes (class)	Gemmatimonadales	unclassified (derived from Gemmatimonadales)	unclassified (derived from Gemmatimonadales)	0	0	1	1.02778	0	0	0	0	0	0	0	0	0	0	0	0	0	0	0	0	0	0	0	0	0	0	0	0	0	0	0	0	0	0	0	0	0	0	0	0	0	0	0	0	0
Tenericutes	Mollicutes	Acholeplasmatales	Acholeplasmataceae	Acholeplasma	0	0	1	1.0261	0	0	0	0	0	0	0	0	0	0	0	0	0	0	0	0	0	0	0	0	0	0	0	0	0	0	0	0	0	0	0	0	0	0	0	0	0	0	0	0	0
Firmicutes	Clostridia	Clostridiales	Syntrophomonadaceae	Syntrophothermus	0	0	1	1.02443	0	0	0	0	0	0	0	0	0	0	0	0	0	0	0	0	0	0	0	0	0	0	0	0	0	0	0	0	0	0	0	0	0	0	0	0	0	0	0	0	0
Synergistetes	Synergistia	Synergistales	Synergistaceae	Thermanaerovibrio	0	0	1	1.02276	0	0	0	0	0	0	0	0	0	0	0	0	0	0	0	0	0	0	0	0	0	0	0	0	0	0	0	0	0	0	0	0	0	0	0	0	0	0	0	0	0
Bacteroidetes	Cytophagia	Cytophagales	Flammeovirgaceae	Flammeovirga	0	0	1	1.0211	0	0	0	0	0	0	0	0	0	0	0	0	0	0	0	0	0	0	0	0	0	0	0	0	0	0	0	0	0	0	0	0	0	0	0	0	0	0	0	0	0
Thermotogae	Thermotogae (class)	Thermotogales	Thermotogaceae	Petrotoga	0	0	1	1.01945	0	0	0	0	0	0	0	0	0	0	0	0	0	0	0	0	0	0	0	0	0	0	0	0	0	0	0	0	0	0	0	0	0	0	0	0	0	0	0	0	0
Proteobacteria	Gammaproteobacteria	Enterobacteriales	Enterobacteriaceae	Tatumella	0	0	1	1.0178	0	0	0	0	0	0	0	0	0	0	0	0	0	0	0	0	0	0	0	0	0	0	0	0	0	0	0	0	0	0	0	0	0	0	0	0	0	0	0	0	0
Synergistetes	Synergistia	Synergistales	Synergistaceae	Anaerobaculum	0	0	1	1.01616	0	0	0	0	0	0	0	0	0	0	0	0	0	0	0	0	0	0	0	0	0	0	0	0	0	0	0	0	0	0	0	0	0	0	0	0	0	0	0	0	0
Proteobacteria	Deltaproteobacteria	Desulfovibrionales	Desulfovibrionaceae	Lawsonia	0	0	1	1.01452	0	0	0	0	0	0	0	0	0	0	0	0	0	0	0	0	0	0	0	0	0	0	0	0	0	0	0	0	0	0	0	0	0	0	0	0	0	0	0	0	0
Bacteroidetes	Flavobacteriia	Flavobacteriales	Blattabacteriaceae	Blattabacterium	0	0	1	1.01288	0	0	0	0	0	0	0	0	0	0	0	0	0	0	0	0	0	0	0	0	0	0	0	0	0	0	0	0	0	0	0	0	0	0	0	0	0	0	0	0	0
Planctomycetes	Planctomycetia	Candidatus Brocadiales	Candidatus Brocadiaceae	Candidatus Kuenenia	0	0	1	1.01125	0	0	0	0	0	0	0	0	0	0	0	0	0	0	0	0	0	0	0	0	0	0	0	0	0	0	0	0	0	0	0	0	0	0	0	0	0	0	0	0	0
Proteobacteria	Deltaproteobacteria	Bdellovibrionales	Bacteriovoracaceae	Bacteriovorax	0	0	1	1.00963	0	0	0	0	0	0	0	0	0	0	0	0	0	0	0	0	0	0	0	0	0	0	0	0	0	0	0	0	0	0	0	0	0	0	0	0	0	0	0	0	0
Proteobacteria	Betaproteobacteria	Methylophilales	unclassified (derived from Methylophilales)	unclassified (derived from Methylophilales)	0	0	1	1.00801	0	0	0	0	0	0	0	0	0	0	0	0	0	0	0	0	0	0	0	0	0	0	0	0	0	0	0	0	0	0	0	0	0	0	0	0	0	0	0	0	0
Firmicutes	Negativicutes	Selenomonadales	Veillonellaceae	Megamonas	0	0	1	1.0064	0	0	0	0	0	0	0	0	0	0	0	0	0	0	0	0	0	0	0	0	0	0	0	0	0	0	0	0	0	0	0	0	0	0	0	0	0	0	0	0	0
Acidobacteria	unclassified (derived from Acidobacteria)	unclassified (derived from Acidobacteria)	unclassified (derived from Acidobacteria)	unclassified (derived from Acidobacteria)	0	0	1	1.00479	0	0	0	0	0	0	0	0	0	0	0	0	0	0	0	0	0	0	0	0	0	0	0	0	0	0	0	0	0	0	0	0	0	0	0	0	0	0	0	0	0
Proteobacteria	Gammaproteobacteria	Pseudomonadales	unclassified (derived from Pseudomonadales)	unclassified (derived from Pseudomonadales)	0	0	1	1.00319	0	0	0	0	0	0	0	0	0	0	0	0	0	0	0	0	0	0	0	0	0	0	0	0	0	0	0	0	0	0	0	0	0	0	0	0	0	0	0	0	0
Thermotogae	Thermotogae (class)	Thermotogales	Thermotogaceae	Marinitoga	0	0	1	1.00159	0	0	0	0	0	0	0	0	0	0	0	0	0	0	0	0	0	0	0	0	0	0	0	0	0	0	0	0	0	0	0	0	0	0	0	0	0	0	0	0	0
Synergistetes	unclassified (derived from Synergistetes)	unclassified (derived from Synergistetes)	unclassified (derived from Synergistetes)	unclassified (derived from Synergistetes)	0	0	1	1	0	0	0	0	0	0	0	0	0	0	0	0	0	0	0	0	0	0	0	0	0	0	0	0	0	0	0	0	0	0	0	0	0	0	0	0	0	0	0	0	0
[truncated: 5 more columns]

## Sheet: Functions
level 1	level 2	level 3	function	Group T: mean rel. freq. (%)	Group C: mean rel. freq. (%)	p-values	p-values (corrected)	4.50496e+06	4.50534e+06	4.50534e+06	4.50556e+06	4.50556e+06	4.52419e+06	4.52419e+06	4.52419e+06	4.5242e+06	4.5242e+06	4.53215e+06	4.5543e+06	4.5543e+06	4.5543e+06	4.5543e+06	4.5543e+06	4.55431e+06	4.55431e+06	4.55431e+06	4.55431e+06	4.55994e+06	4.55568e+06	4.55568e+06	4.55568e+06	4.55568e+06	4.55608e+06	4.55608e+06	4.55778e+06	4.55785e+06	4.64163e+06	4.64163e+06	4.64163e+06	4.64163e+06	4.64163e+06	4.64163e+06	4.64163e+06	4.64163e+06	4.64164e+06	4.64164e+06	4.64164e+06	4.64164e+06	4.64164e+06
Cofactors, Vitamins, Prosthetic Groups, Pigments	Folate and pterines	YgfZ	Amidophosphoribosyltransferase (EC 2.4.2.14)	0.00938755	0.0983598	0.000172964	0.000172964	0	0	0	0	0	0.0540346	0	0	0.0235183	0.0410256	0.0304136	0	0	0	0	0	0	0.0481464	0	0	0	0.15949	0.10062	0.36448	0.152207	0.193237	0.101215	0.104275	0.292113	0.0406009	0	0.0551876	0	0.0742942	0	0	0.0312695	0	0.130194	0	0	0.112644
Cofactors, Vitamins, Prosthetic Groups, Pigments	Cofactors, Vitamins, Prosthetic Groups, Pigments	Thiamin biosynthesis	Thiamin-phosphate pyrophosphorylase (EC 2.5.1.3)	0.00229268	0.0937162	0.000285138	0.000285138	0	0	0	0	0	0	0	0	0	0	0	0	0	0	0	0	0	0.0481464	0	0	0	0.0531632	0.0670803	0.165673	0.0951294	0.0322061	0.303644	0.312826	0.389484	0.0609013	0.1638	0.165563	0	0	0	0	0.0625391	0	0.0433981	0	0.0989609	0.0844832
Cofactors, Vitamins, Prosthetic Groups, Pigments	Folate and pterines	5-FCL-like protein	Thiamin-phosphate pyrophosphorylase (EC 2.5.1.3) - #1	0.00229268	0.0937162	0.000285138	0.000285138	0	0	0	0	0	0	0	0	0	0	0	0	0	0	0	0	0	0.0481464	0	0	0	0.0531632	0.0670803	0.165673	0.0951294	0.0322061	0.303644	0.312826	0.389484	0.0609013	0.1638	0.165563	0	0	0	0	0.0625391	0	0.0433981	0	0.0989609	0.0844832
Cofactors, Vitamins, Prosthetic Groups, Pigments	Biotin	Biotin biosynthesis	Long-chain-fatty-acid--CoA ligase (EC 6.2.1.3)	0.0267937	0.143251	0.000536367	0.000536367	0	0	0	0	0	0	0	0	0	0.14359	0.0304136	0	0	0	0	0.196078	0	0.192585	0	0	0	0.106326	0.134161	0.265076	0.228311	0.0322061	0	0.104275	0	0.304507	0.1638	0.165563	0	0.148588	0.323712	0	0.0625391	0	0.162743	0	0.296883	0.450577
Cofactors, Vitamins, Prosthetic Groups, Pigments	Biotin	Biotin biosynthesis	Biotin operon repressor - #1	0.0246332	0.000867961	0.00198545	0.00198545	0	0.0956938	0.0997009	0	0	0.0540346	0.0576147	0.0309502	0.0470367	0.0410256	0.0912409	0	0	0	0	0	0	0	0	0	0	0	0	0	0	0	0	0	0	0	0	0	0	0	0	0	0	0	0.021699	0	0	0
Cofactors, Vitamins, Prosthetic Groups, Pigments	Cofactors, Vitamins, Prosthetic Groups, Pigments	Thiamin biosynthesis	Hydroxymethylpyrimidine ABC transporter, transmembrane component	0	0.0199802	0.00281138	0.00281138	0	0	0	0	0	0	0	0	0	0	0	0	0	0	0	0	0	0	0	0	0	0	0	0	0.0190259	0	0	0	0	0.0203004	0	0.0551876	0	0.0742942	0.026976	0	0.0312695	0	0.0325486	0	0.0989609	0.0281611
Cofactors, Vitamins, Prosthetic Groups, Pigments	Folate and pterines	5-FCL-like protein	Butyryl-CoA dehydrogenase (EC 1.3.99.2) - #7	0.0162229	0.0964947	0.00398694	0.00398694	0	0	0	0	0	0	0.0384098	0	0	0.0615385	0	0	0	0	0	0	0	0.240732	0	0	0	0.0531632	0.10062	0.0662691	0.0761035	0.0322061	0	0.208551	0.097371	0.203004	0.1638	0.165563	0.452489	0	0.161856	0	0	0	0.0867961	0	0.197922	0
Cofactors, Vitamins, Prosthetic Groups, Pigments	Riboflavin, FMN, FAD	Riboflavin, FMN and FAD metabolism	3,4-dihydroxy-2-butanone 4-phosphate synthase	0.00454734	0.0366775	0.00519368	0.00519368	0	0	0	0	0	0	0	0.0309502	0.0235183	0.0410256	0	0	0	0	0	0	0	0	0	0	0	0.106326	0.0167701	0.132538	0.0380518	0.0966184	0	0	0.097371	0.0406009	0.1638	0.0551876	0	0	0.026976	0	0	0	0.021699	0	0	0
Cofactors, Vitamins, Prosthetic Groups, Pigments	Folate and pterines	YgfZ	Biotin synthase (EC 2.8.1.6) - #1	0.0105908	0.0496183	0.00523461	0.00523461	0	0	0	0	0	0	0	0.0619003	0	0	0	0	0.0951475	0	0	0.0653595	0	0	0	0	0	0.106326	0.150931	0.132538	0.0190259	0.0322061	0	0.104275	0.097371	0.0406009	0.0819001	0.110375	0	0	0	0	0.0312695	0	0.021699	0.171527	0	0
Cofactors, Vitamins, Prosthetic Groups, Pigments	Biotin	Biotin biosynthesis	Biotin synthase (EC 2.8.1.6)	0.0105908	0.0496183	0.00523461	0.00523461	0	0	0	0	0	0	0	0.0619003	0	0	0	0	0.0951475	0	0	0.0653595	0	0	0	0	0	0.106326	0.150931	0.132538	0.0190259	0.0322061	0	0.104275	0.097371	0.0406009	0.0819001	0.110375	0	0	0	0	0.0312695	0	0.021699	0.171527	0	0
Cofactors, Vitamins, Prosthetic Groups, Pigments	Tetrapyrroles	Coenzyme B12 biosynthesis	Uroporphyrinogen-III methyltransferase (EC 2.1.1.107)	0.00861999	0.0499075	0.0057275	0.0057275	0	0	0	0	0	0	0	0	0	0.0205128	0	0	0.0951475	0	0	0.0653595	0	0	0	0	0	0.106326	0.167701	0.132538	0.171233	0.0644122	0	0.104275	0	0.0406009	0.0819001	0.0551876	0	0.0742942	0.026976	0	0	0	0.0108495	0	0	0
Cofactors, Vitamins, Prosthetic Groups, Pigments	Folate and pterines	YgfZ	Ferredoxin	0.0457125	0.114057	0.00868269	0.00868269	0	0.191388	0.0997009	0	0	0.0360231	0.0768197	0.0928505	0	0.0205128	0.121655	0	0.190295	0	0	0.130719	0	0	0	0	0	0.0797448	0.117391	0.132538	0.209285	0.0644122	0.101215	0	0	0.203004	0.0819001	0.275938	0	0.222883	0.13488	0	0.156348	0.273973	0.130194	0	0.296883	0.0844832
Cofactors, Vitamins, Prosthetic Groups, Pigments	Folate and pterines	YgfZ-Iron	Tricarboxylate transport membrane protein TctA - #1	0.000976801	0.0191352	0.00943211	0.00943211	0	0	0	0	0	0	0	0	0	0.0205128	0	0	0	0	0	0	0	0	0	0	0	0	0.0167701	0	0.0190259	0	0	0	0	0.0406009	0.0819001	0.110375	0	0	0.026976	0	0.0312695	0	0.0325486	0	0.0494805	0
Cofactors, Vitamins, Prosthetic Groups, Pigments	Tetrapyrroles	Cobalamin synthesis	Cobyric acid synthase	0	0.0121055	0.00971007	0.00971007	0	0	0	0	0	0	0	0	0	0	0	0	0	0	0	0	0	0	0	0	0	0.0265816	0.0167701	0.0331345	0	0.0322061	0	0	0	0.0406009	0	0	0	0.0742942	0.026976	0	0	0	0	0	0	0
Cofactors, Vitamins, Prosthetic Groups, Pigments	Tetrapyrroles	Coenzyme B12 biosynthesis	Cobyric acid synthase - #1	0	0.0121055	0.00971007	0.00971007	0	0	0	0	0	0	0	0	0	0	0	0	0	0	0	0	0	0	0	0	0	0.0265816	0.0167701	0.0331345	0	0.0322061	0	0	0	0.0406009	0	0	0	0.0742942	0.026976	0	0	0	0	0	0	0
Cofactors, Vitamins, Prosthetic Groups, Pigments	Tetrapyrroles	Coenzyme B12 biosynthesis	Transmembrane component CbiQ of energizing module of cobalt ECF transporter	0	0.019931	0.00987009	0.00987009	0	0	0	0	0	0	0	0	0	0	0	0	0	0	0	0	0	0	0	0	0	0	0	0.0662691	0.0190259	0.0322061	0	0.104275	0.097371	0.0203004	0	0.0551876	0	0	0	0	0	0	0	0	0	0
Cofactors, Vitamins, Prosthetic Groups, Pigments	Pyridoxine	Pyridoxin (Vitamin B6) Biosynthesis	Pyridoxine biosynthesis glutamine amidotransferase, glutaminase subunit (EC 2.4.2.-)	0	0.0169632	0.0108741	0.0108741	0	0	0	0	0	0	0	0	0	0	0	0	0	0	0	0	0	0	0	0	0	0	0	0.0331345	0.0380518	0.0644122	0	0	0.097371	0.0203004	0	0	0	0	0	0	0	0	0.0108495	0	0	0.0563222
Cofactors, Vitamins, Prosthetic Groups, Pigments	Folate and pterines	YgfZ	Thiol:disulfide interchange protein DsbC	0.00622471	0.037701	0.0114646	0.0114646	0	0	0	0	0	0	0	0	0	0	0	0	0	0	0	0.130719	0	0	0	0	0	0.0265816	0	0.0331345	0.0570776	0.0322061	0	0	0	0.0406009	0.1638	0.0551876	0	0.148588	0.080928	0	0	0	0.021699	0	0.0989609	0
Cofactors, Vitamins, Prosthetic Groups, Pigments	Biotin	Biotin biosynthesis	Adenosylmethionine-8-amino-7-oxononanoate aminotransferase (EC 2.6.1.62)	0.00144827	0.0166499	0.0117422	0.0117422	0	0	0	0	0	0	0	0	0	0	0.0304136	0	0	0	0	0	0	0	0	0	0	0	0.0167701	0.0662691	0.0570776	0	0	0	0	0.0609013	0	0	0	0	0	0	0.0312695	0	0.021699	0	0.0494805	0
Cofactors, Vitamins, Prosthetic Groups, Pigments	Coenzyme A	Coenzyme A Biosynthesis	Pantothenate kinase type III, CoaX-like (EC 2.7.1.33)	0	0.0230631	0.0124948	0.0124948	0	0	0	0	0	0	0	0	0	0	0	0	0	0	0	0	0	0	0	0	0	0	0	0	0	0.0322061	0	0	0	0.0406009	0	0	0	0	0	0	0	0	0.021699	0	0.0494805	0.0844832
Cofactors, Vitamins, Prosthetic Groups, Pigments	Folate and pterines	YgfZ	GTP cyclohydrolase II (EC 3.5.4.25) - #1	0.00377978	0.028101	0.0139718	0.0139718	0	0	0	0	0	0.0180115	0	0.0309502	0	0	0.0304136	0	0	0	0	0	0	0	0	0	0	0.106326	0.0167701	0.132538	0.0951294	0.0644122	0	0	0.097371	0.0203004	0	0.0551876	0	0	0	0	0	0	0.0108495	0	0	0
Cofactors, Vitamins, Prosthetic Groups, Pigments	Folate and pterines	Molybdenum cofactor biosynthesis	GTP cyclohydrolase II (EC 3.5.4.25)	0.00377978	0.028101	0.0139718	0.0139718	0	0	0	0	0	0.0180115	0	0.0309502	0	0	0.0304136	0	0	0	0	0	0	0	0	0	0	0.106326	0.0167701	0.132538	0.0951294	0.0644122	0	0	0.097371	0.0203004	0	0.0551876	0	0	0	0	0	0	0.0108495	0	0	0
Cofactors, Vitamins, Prosthetic Groups, Pigments	Folate and pterines	YgfZ	Rhodanese-related sulfurtransferase - #1	0.00712042	0.0558327	0.0179647	0.0179647	0	0	0	0	0	0.0360231	0	0	0	0	0	0	0	0	0	0.0653595	0	0.0481464	0	0	0	0	0.0503102	0	0.0190259	0.0322061	0	0	0	0.121803	0.0819001	0.110375	0	0.371471	0.053952	0.21322	0	0	0.0542476	0	0.148441	0
Cofactors, Vitamins, Prosthetic Groups, Pigments	Riboflavin, FMN, FAD	Riboflavin, FMN and FAD metabolism	Substrate-specific component RibU of riboflavin ECF transporter	0.0175438	0.00211874	0.0194176	0.0194176	0	0.0956938	0.0997009	0	0	0.0180115	0.0192049	0.0309502	0.0235183	0.0205128	0.0608273	0	0	0	0	0	0	0	0	0	0	0	0	0	0	0	0	0	0	0	0	0	0	0	0	0	0.0312695	0	0.021699	0	0	0
Cofactors, Vitamins, Prosthetic Groups, Pigments	Folate and pterines	YgfZ	tRNA-i(6)A37 methylthiotransferase - #1	0.0160295	0.0557732	0.0197724	0.0197724	0	0	0	0	0	0.0180115	0.153639	0.0309502	0	0.0205128	0	0	0	0	0	0.0653595	0	0.0481464	0	0	0	0.106326	0.10062	0.0662691	0.0380518	0	0	0.104275	0	0.0406009	0.0819001	0.165563	0	0	0.026976	0	0	0.273973	0.0325486	0	0	0.140805
Cofactors, Vitamins, Prosthetic Groups, Pigments	Cofactors, Vitamins, Prosthetic Groups, Pigments	Thiamin biosynthesis	Transmembrane component YkoC of energizing module of thiamin-regulated ECF transporter for HydroxyMethylPyrimidine	0	0.012195	0.0219622	0.0219622	0	0	0	0	0	0	0	0	0	0	0	0	0	0	0	0	0	0	0	0	0	0.0265816	0.0335402	0	0	0.0644122	0	0	0	0	0.0819001	0	0	0	0	0	0.0312695	0	0.0108495	0	0	0.0563222
Cofactors, Vitamins, Prosthetic Groups, Pigments	Tetrapyrroles	Coenzyme B12 biosynthesis	Vitamin B12 ABC transporter, permease component BtuC	0.0104277	0.000694324	0.0254153	0.0254153	0	0	0	0	0	0.0360231	0.0192049	0.0619003	0	0.0410256	0.0608273	0	0	0	0	0	0	0	0	0	0	0	0	0	0	0	0	0	0	0	0	0	0	0	0	0	0	0	0	0	0	0
Cofactors, Vitamins, Prosthetic Groups, Pigments	Pyridoxine	Pyridoxin (Vitamin B6) Biosynthesis	1-deoxy-D-xylulose 5-phosphate synthase (EC 2.2.1.7)	0.0101304	0.0494103	0.0256747	0.0256747	0	0	0	0	0	0	0	0	0.117592	0	0	0	0.0951475	0	0	0	0	0	0	0	0	0.0265816	0.0167701	0.0331345	0.0380518	0.0322061	0	0	0.097371	0.0203004	0	0	0	0	0.053952	0	0	0.273973	0.0542476	0	0.0494805	0.225289
Cofactors, Vitamins, Prosthetic Groups, Pigments	Cofactors, Vitamins, Prosthetic Groups, Pigments	Thiamin biosynthesis	Glycine oxidase ThiO (EC 1.4.3.19)	0.00171538	0.0198966	0.0258945	0.0258945	0	0	0	0	0	0.0360231	0	0	0	0	0	0	0	0	0	0	0	0	0	0	0	0.0265816	0.0167701	0.0331345	0.0190259	0.0966184	0	0.104275	0.097371	0	0	0	0	0	0	0	0	0	0	0	0	0
Cofactors, Vitamins, Prosthetic Groups, Pigments	Riboflavin, FMN, FAD	Riboflavin, FMN and FAD metabolism	Diaminohydroxyphosphoribosylaminopyrimidine deaminase (EC 3.5.4.26)	0.00223984	0.0251005	0.0283938	0.0283938	0	0	0	0	0	0	0	0	0.0470367	0	0	0	0	0	0	0	0	0	0	0	0	0.0265816	0	0	0.0951294	0.0322061	0	0.104275	0.097371	0	0	0	0	0	0	0	0	0	0.0325486	0	0.0494805	0
Cofactors, Vitamins, Prosthetic Groups, Pigments	Coenzyme A	Coenzyme A Biosynthesis	Ketol-acid reductoisomerase (EC 1.1.1.86) - #1	0.00242507	0.0143917	0.0287955	0.0287955	0	0	0	0	0	0	0	0	0	0.0205128	0.0304136	0	0	0	0	0	0	0	0	0	0	0.0265816	0.0670803	0.0331345	0.0570776	0.0644122	0	0	0	0	0	0	0	0	0.026976	0	0	0	0.0108495	0	0	0.0563222
Cofactors, Vitamins, Prosthetic Groups, Pigments	Tetrapyrroles	Cobalamin synthesis	Cobalt-precorrin-3b C17-methyltransferase	0	0.0348015	0.0293176	0.0293176	0	0	0	0	0	0	0	0	0	0	0	0	0	0	0	0	0	0	0	0	0	0.186071	0.0335402	0.0662691	0.0190259	0	0	0	0.097371	0.0203004	0	0	0	0	0	0	0	0.273973	0	0	0	0
Cofactors, Vitamins, Prosthetic Groups, Pigments	Tetrapyrroles	Coenzyme B12 biosynthesis	Cobalt-precorrin-3b C17-methyltransferase - #1	0	0.0348015	0.0293176	0.0293176	0	0	0	0	0	0	0	0	0	0	0	0	0	0	0	0	0	0	0	0	0	0.186071	0.0335402	0.0662691	0.0190259	0	0	0	0.097371	0.0203004	0	0	0	0	0	0	0	0.273973	0	0	0	0
Cofactors, Vitamins, Prosthetic Groups, Pigments	Tetrapyrroles	Coenzyme B12 biosynthesis	L-threonine 3-O-phosphate decarboxylase (EC 4.1.1.81) - #1	0.000976801	0.015548	0.0304607	0.0304607	0	0	0	0	0	0	0	0	0	0.0205128	0	0	0	0	0	0	0	0	0	0	0	0	0.0167701	0	0.0190259	0	0	0	0	0.0203004	0.0819001	0.110375	0	0.0742942	0.026976	0	0	0	0.021699	0	0	0
Cofactors, Vitamins, Prosthetic Groups, Pigments	Tetrapyrroles	Cobalamin synthesis	L-threonine 3-O-phosphate decarboxylase (EC 4.1.1.81)	0.000976801	0.015548	0.0304607	0.0304607	0	0	0	0	0	0	0	0	0	0.0205128	0	0	0	0	0	0	0	0	0	0	0	0	0.0167701	0	0.0190259	0	0	0	0	0.0203004	0.0819001	0.110375	0	0.0742942	0.026976	0	0	0	0.021699	0	0	0
Cofactors, Vitamins, Prosthetic Groups, Pigments	Cofactors, Vitamins, Prosthetic Groups, Pigments	Molybdopterin cytosine dinucleotide	CTP:molybdopterin cytidylyltransferase - #1	0.00645869	0.022464	0.0307368	0.0307368	0	0	0	0	0	0.0360231	0	0.0309502	0	0.0205128	0	0	0	0	0	0	0	0.0481464	0	0	0	0	0.0167701	0.0331345	0.0190259	0.0322061	0	0	0	0.0406009	0.0819001	0.110375	0	0.0742942	0.026976	0	0.0312695	0	0.0108495	0	0.0494805	0
Cofactors, Vitamins, Prosthetic Groups, Pigments	Riboflavin, FMN, FAD	Riboflavin, FMN and FAD metabolism	5-amino-6-(5-phosphoribosylamino)uracil reductase (EC 1.1.1.193)	0.00223984	0.0246665	0.0312937	0.0312937	0	0	0	0	0	0	0	0	0.0470367	0	0	0	0	0	0	0	0	0	0	0	0	0.0265816	0	0	0.0951294	0.0322061	0	0.104275	0.097371	0	0	0	0	0	0	0	0	0	0.021699	0	0.0494805	0
Cofactors, Vitamins, Prosthetic Groups, Pigments	Tetrapyrroles	Coenzyme B12 biosynthesis	Cobalt-precorrin-6y C5-methyltransferase (EC 2.1.1.-)	0	0.0323497	0.0319683	0.0319683	0	0	0	0	0	0	0	0	0	0	0	0	0	0	0	0	0	0	0	0	0	0.186071	0.0503102	0.0662691	0.0190259	0	0	0	0.097371	0.0203004	0	0	0	0	0	0	0	0.273973	0	0	0	0
Cofactors, Vitamins, Prosthetic Groups, Pigments	Tetrapyrroles	Coenzyme B12 biosynthesis	Substrate-specific component CbrT of predicted cobalamin ECF transporter	0	0.0292682	0.0322466	0.0322466	0	0	0	0	0	0	0	0	0	0	0	0	0	0	0	0	0	0	0	0	0	0	0	0.0331345	0.0190259	0	0	0.104275	0.097371	0	0.0819001	0.0551876	0	0	0	0	0	0.273973	0	0	0.0494805	0
Cofactors, Vitamins, Prosthetic Groups, Pigments	Tetrapyrroles	Coenzyme B12 biosynthesis	Cobalt-precorrin-6y C15-methyltransferase [decarboxylating] (EC 2.1.1.-)	0	0.0316789	0.0352354	0.0352354	0	0	0	0	0	0	0	0	0	0	0	0	0	0	0	0	0	0	0	0	0	0.186071	0.0335402	0.0662691	0.0190259	0	0	0	0.097371	0.0203004	0	0	0	0	0	0	0	0.273973	0	0	0	0
Cofactors, Vitamins, Prosthetic Groups, Pigments	Folate and pterines	Folate Biosynthesis	GTP cyclohydrolase I (EC 3.5.4.16) type 1	0.0305813	0.00673227	0.0358197	0.0358197	0	0.0956938	0.0997009	0	0	0	0.0192049	0.0619003	0.0940734	0.0205128	0.0608273	0	0.190295	0	0	0	0	0	0	0	0	0	0	0	0	0	0	0	0	0	0.0819001	0	0	0	0.026976	0	0.0312695	0	0	0	0	0.0281611
Cofactors, Vitamins, Prosthetic Groups, Pigments	Folate and pterines	Molybdenum cofactor biosynthesis	Molybdenum cofactor biosynthesis protein MoaE	0.00189132	0.0182443	0.0371411	0.0371411	0	0	0	0	0	0	0.0192049	0	0	0.0205128	0	0	0	0	0	0	0	0	0	0	0	0.0531632	0.0335402	0	0.0570776	0.0322061	0	0	0	0.0406009	0	0	0	0	0.026976	0	0	0	0.021699	0	0	0
Cofactors, Vitamins, Prosthetic Groups, Pigments	Folate and pterines	5-FCL-like protein	Methylenetetrahydrofolate dehydrogenase (NADP+) (EC 1.5.1.5) / Methenyltetrahydrofolate cyclohydrolase (EC 3.5.4.9)	0.0127567	0.0425637	0.0371731	0.0371731	0	0	0	0	0	0.0360231	0.0384098	0.0309502	0.070555	0.0615385	0.0304136	0	0	0	0	0	0	0	0	0	0	0.0797448	0.0503102	0.0662691	0.0380518	0.0322061	0	0.104275	0.097371	0.0203004	0	0	0	0	0	0	0.0938086	0.273973	0.0325486	0	0.0494805	0.0563222
Cofactors, Vitamins, Prosthetic Groups, Pigments	Tetrapyrroles	Heme and Siroheme Biosynthesis	Hypothetical radical SAM family enzyme in heat shock gene cluster, similarity with CPO of BS HemN-type	0.011467	0.00112644	0.0373171	0.0373171	0	0.0956938	0	0	0	0	0.0192049	0.0309502	0.0235183	0.0410256	0.0304136	0	0	0	0	0	0	0	0	0	0	0	0	0	0	0	0	0	0	0	0	0	0	0	0	0	0	0	0	0	0	0.0281611
Cofactors, Vitamins, Prosthetic Groups, Pigments	Cofactors, Vitamins, Prosthetic Groups, Pigments	Thiamin biosynthesis	Substrate-specific component ThiT of thiamin ECF transporter	0.0115387	0.00125078	0.0381515	0.0381515	0	0	0.0997009	0	0	0.0180115	0.0192049	0.0309502	0.0235183	0.0205128	0.0304136	0	0	0	0	0	0	0	0	0	0	0	0	0	0	0	0	0	0	0	0	0	0	0	0	0	0.0312695	0	0	0	0	0
Cofactors, Vitamins, Prosthetic Groups, Pigments	NAD and NADP	NAD regulation	Quinolinate phosphoribosyltransferase [decarboxylating] (EC 2.4.2.19) - #1	0.00171538	0.013633	0.039274	0.039274	0	0	0	0	0	0.0360231	0	0	0	0	0	0	0	0	0	0	0	0	0	0	0	0	0.0167701	0.0331345	0	0	0	0	0	0.0203004	0	0	0	0	0	0	0	0	0.0433981	0	0	0.0281611
Cofactors, Vitamins, Prosthetic Groups, Pigments	NAD and NADP	NAD and NADP cofactor biosynthesis global	Quinolinate phosphoribosyltransferase [decarboxylating] (EC 2.4.2.19)	0.00171538	0.013633	0.039274	0.039274	0	0	0	0	0	0.0360231	0	0	0	0	0	0	0	0	0	0	0	0	0	0	0	0	0.0167701	0.0331345	0	0	0	0	0	0.0203004	0	0	0	0	0	0	0	0	0.0433981	0	0	0.0281611
Cofactors, Vitamins, Prosthetic Groups, Pigments	Folate and pterines	YgfZ	DUF1794	0	0.0068428	0.0405132	0.0405132	0	0	0	0	0	0	0	0	0	0	0	0	0	0	0	0	0	0	0	0	0	0.0531632	0.0335402	0.0331345	0.0190259	0.0322061	0	0	0	0	0	0	0	0	0	0	0	0	0	0	0	0
Cofactors, Vitamins, Prosthetic Groups, Pigments	Tetrapyrroles	Cobalamin synthesis	Cobalamin biosynthesis protein CbiG	0	0.0554278	0.0408455	0.0408455	0	0	0	0	0	0	0	0	0	0	0	0	0	0	0	0	0	0	0	0	0	0.186071	0.0335402	0.0994036	0.0190259	0	0	0.208551	0.097371	0.0203004	0	0	0	0	0	0	0	0.547945	0	0	0	0
Cofactors, Vitamins, Prosthetic Groups, Pigments	Tetrapyrroles	Coenzyme B12 biosynthesis	Cobalamin biosynthesis protein CbiG - #1	0	0.0554278	0.0408455	0.0408455	0	0	0	0	0	0	0	0	0	0	0	0	0	0	0	0	0	0	0	0	0	0.186071	0.0335402	0.0994036	0.0190259	0	0	0.208551	0.097371	0.0203004	0	0	0	0	0	0	0	0.547945	0	0	0	0
Cofactors, Vitamins, Prosthetic Groups, Pigments	Folate and pterines	Pterin metabolism 3	COG1565: Uncharacterized conserved protein - #1	0.000857692	0.00979	0.040976	0.040976	0	0	0	0	0	0.0180115	0	0	0	0	0	0	0	0	0	0	0	0	0	0	0	0	0.0167701	0	0.0190259	0	0	0	0	0.0406009	0.0819001	0	0	0	0.026976	0	0.0312695	0	0.0108495	0	0	0
Cofactors, Vitamins, Prosthetic Groups, Pigments	Coenzyme A	Coenzyme A Biosynthesis	Pantothenate kinase (EC 2.7.1.33)	0.0241714	0.00620838	0.0419774	0.0419774	0	0	0.0997009	0	0	0.0180115	0.0576147	0.0619003	0.117592	0.0615385	0.0912409	0	0	0	0	0	0	0	0	0	0	0.0265816	0.0335402	0	0	0	0	0	0	0	0	0	0	0	0	0	0.0625391	0	0.0325486	0	0	0
Cofactors, Vitamins, Prosthetic Groups, Pigments	NAD and NADP	NAD and NADP cofactor biosynthesis global	Predicted N-ribosylNicotinamide CRP-like regulator	0.0130587	0	0.0421085	0.0421085	0	0.0956938	0.0997009	0	0	0.0180115	0	0	0	0	0.0608273	0	0	0	0	0	0	0	0	0	0	0	0	0	0	0	0	0	0	0	0	0	0	0	0	0	0	0	0	0	0	0
Cofactors, Vitamins, Prosthetic Groups, Pigments	NAD and NADP	NAD regulation	Ribosyl nicotinamide transporter, PnuC-like - #1	0.00292209	0.0255965	0.0424749	0.0424749	0	0	0	0	0	0	0	0.0309502	0	0	0.0304136	0	0	0	0	0	0	0	0	0	0	0.0531632	0.0167701	0	0.0190259	0.0644122	0	0	0	0	0	0	0	0.222883	0.026976	0	0.0312695	0	0.0108495	0	0	0.0281611
Cofactors, Vitamins, Prosthetic Groups, Pigments	NAD and NADP	NAD and NADP cofactor biosynthesis global	Ribosyl nicotinamide transporter, PnuC-like	0.00292209	0.0255965	0.0424749	0.0424749	0	0	0	0	0	0	0	0.0309502	0	0	0.0304136	0	0	0	0	0	0	0	0	0	0	0.0531632	0.0167701	0	0.0190259	0.0644122	0	0	0	0	0	0	0	0.222883	0.026976	0	0.0312695	0	0.0108495	0	0	0.0281611
Cofactors, Vitamins, Prosthetic Groups, Pigments	Folate and pterines	YgfZ	NADH-ubiquinone oxidoreductase chain F (EC 1.6.5.3)	0	0.0101728	0.0425468	0.0425468	0	0	0	0	0	0	0	0	0	0	0	0	0	0	0	0	0	0	0	0	0	0.0265816	0	0.0331345	0.0380518	0.0322061	0	0	0.097371	0	0	0	0	0	0.026976	0	0	0	0	0	0	0
Cofactors, Vitamins, Prosthetic Groups, Pigments	Folate and pterines	YgfZ	Thiazole biosynthesis protein ThiH - #1	0.00976174	0	0.0440587	0.0440587	0	0	0	0	0	0	0.0384098	0	0	0.0410256	0.0304136	0	0.0951475	0	0	0	0	0	0	0	0	0	0	0	0	0	0	0	0	0	0	0	0	0	0	0	0	0	0	0	0	0
Cofactors, Vitamins, Prosthetic Groups, Pigments	Cofactors, Vitamins, Prosthetic Groups, Pigments	Thiamin biosynthesis	Thiazole biosynthesis protein ThiH	0.00976174	0	0.0440587	0.0440587	0	0	0	0	0	0	0.0384098	0	0	0.0410256	0.0304136	0	0.0951475	0	0	0	0	0	0	0	0	0	0	0	0	0	0	0	0	0	0	0	0	0	0	0	0	0	0	0	0	0
Cofactors, Vitamins, Prosthetic Groups, Pigments	Folate and pterines	YgfZ-Iron	Heme O synthase, protoheme IX farnesyltransferase (EC 2.5.1.-) COX10-CtaB - #2	0.00549989	0.0268519	0.0471124	0.0471124	0	0	0	0	0	0	0.0192049	0	0	0	0	0	0	0	0	0	0	0.0962927	0	0	0	0.0265816	0.0167701	0.0994036	0.0190259	0.0322061	0.101215	0	0	0.0406009	0	0	0	0	0	0	0	0	0.0108495	0.171527	0.0494805	0
Cofactors, Vitamins, Prosthetic Groups, Pigments	Biotin	Biotin biosynthesis	Substrate-specific component BioY of biotin ECF transporter	0.0135641	0.00112644	0.0488666	0.0488666	0	0.0956938	0.0997009	0	0	0.0180115	0	0	0	0.0410256	0.0304136	0	0	0	0	0	0	0	0	0	0	0	0	0	0	0	0	0	0	0	0	0	0	0	0	0	0	0	0	0	0	0.0281611
Cofactors, Vitamins, Prosthetic Groups, Pigments	Tetrapyrroles	Coenzyme B12 biosynthesis	5,6-dimethylbenzimidazole synthase, flavin destructase family	0	0.0201418	0.0511086	0.0511086	0	0	0	0	0	0	0	0	0	0	0	0	0	0	0	0	0	0	0	0	0	0.0797448	0.0167701	0	0.0190259	0.0644122	0	0	0	0	0	0.0551876	0	0	0.026976	0.21322	0	0	0.0108495	0	0	0
Cofactors, Vitamins, Prosthetic Groups, Pigments	Tetrapyrroles	Cobalamin synthesis	Cobalamin biosynthesis protein BluB	0	0.0201418	0.0511086	0.0511086	0	0	0	0	0	0	0	0	0	0	0	0	0	0	0	0	0	0	0	0	0	0.0797448	0.0167701	0	0.0190259	0.0644122	0	0	0	0	0	0.0551876	0	0	0.026976	0.21322	0	0	0.0108495	0	0	0
Cofactors, Vitamins, Prosthetic Groups, Pigments	Coenzyme A	Coenzyme A Biosynthesis	Dephospho-CoA kinase (EC 2.7.1.24)	0.00602451	0.0464348	0.0522277	0.0522277	0	0	0	0	0	0.0720461	0	0.0309502	0.0235183	0	0	0	0	0	0	0	0	0	0	0	0	0.0265816	0.0167701	0.0331345	0.114155	0.0966184	0	0	0	0.0406009	0.0819001	0	0.452489	0	0.053952	0	0	0	0.0542476	0	0.0494805	0.0281611
Cofactors, Vitamins, Prosthetic Groups, Pigments	Coenzyme A	Coenzyme A Biosynthesis	Substrate-specific component PanT of predicted pantothenate ECF transporter	0.0157672	0.0029867	0.0533016	0.0533016	0	0.0956938	0.0997009	0	0	0.0180115	0.0192049	0.0309502	0.0470367	0.0205128	0	0	0	0	0	0	0	0	0	0	0	0	0	0	0	0	0	0	0	0	0	0	0	0	0	0	0.0312695	0	0.0433981	0	0	0
Cofactors, Vitamins, Prosthetic Groups, Pigments	Tetrapyrroles	Heme biosynthesis orphans	Radical SAM domain heme biosynthesis protein	0	0.013521	0.0540923	0.0540923	0	0	0	0	0	0	0	0	0	0	0	0	0	0	0	0	0	0	0	0	0	0.0531632	0.0167701	0.0994036	0	0.0644122	0	0.104275	0	0	0	0	0	0	0	0	0	0	0	0	0	0
Cofactors, Vitamins, Prosthetic Groups, Pigments	Folate and pterines	Folate Biosynthesis	Para-aminobenzoate synthase, amidotransferase component (EC 2.6.1.85) - #3	0.00229268	0.0160335	0.0542496	0.0542496	0	0	0	0	0	0	0	0	0	0	0	0	0	0	0	0	0	0.0481464	0	0	0	0.0531632	0.0670803	0.0331345	0	0	0	0	0	0	0.0819001	0.110375	0	0	0.026976	0	0	0	0.0108495	0	0	0
Cofactors, Vitamins, Prosthetic Groups, Pigments	Quinone cofactors	Ubiquinone Biosynthesis	3-demethylubiquinone-9 3-methyltransferase (EC 2.1.1.64)	0	0.00893669	0.0547509	0.0547509	0	0	0	0	0	0	0	0	0	0	0	0	0	0	0	0	0	0	0	0	0	0	0	0	0	0	0	0	0	0.0203004	0.0819001	0	0	0	0.053952	0	0	0	0.0325486	0	0	0
Cofactors, Vitamins, Prosthetic Groups, Pigments	Folate and pterines	YgfZ	Dihydroorotate dehydrogenase (EC 1.3.3.1) - #1	0.007711	0.023565	0.0550114	0.0550114	0	0	0	0	0	0.0180115	0	0	0	0	0.0304136	0	0	0	0	0.0653595	0	0.0481464	0	0	0	0.0265816	0.0335402	0.0994036	0.0380518	0.0322061	0	0	0	0	0	0	0	0.0742942	0.053952	0	0	0	0.0108495	0	0.0494805	0.0844832
Cofactors, Vitamins, Prosthetic Groups, Pigments	Quinone cofactors	Pyrroloquinoline Quinone biosynthesis	Coenzyme PQQ synthesis protein B - #1	0	0.00789416	0.0573261	0.0573261	0	0	0	0	0	0	0	0	0	0	0	0	0	0	0	0	0	0	0	0	0	0	0.0167701	0	0.0190259	0	0	0	0	0.0406009	0.0819001	0	0	0	0	0	0	0	0.021699	0	0	0
Cofactors, Vitamins, Prosthetic Groups, Pigments	Quinone cofactors	Coenzyme PQQ synthesis	Coenzyme PQQ synthesis protein B	0	0.00789416	0.0573261	0.0573261	0	0	0	0	0	0	0	0	0	0	0	0	0	0	0	0	0	0	0	0	0	0	0.0167701	0	0.0190259	0	0	0	0	0.0406009	0.0819001	0	0	0	0	0	0	0	0.021699	0	0	0
Cofactors, Vitamins, Prosthetic Groups, Pigments	Folate and pterines	p-Aminobenzoyl-Glutamate Utilization	Regulatory protein (induces abgABT, used to catabolize p-aminobenzoyl-glutamate)	0.00322048	0	0.0602622	0.0602622	0	0	0	0	0	0.0180115	0.0192049	0	0	0	0.0304136	0	0	0	0	0	0	0	0	0	0	0	0	0	0	0	0	0	0	0	0	0	0	0	0	0	0	0	0	0	0	0
Cofactors, Vitamins, Prosthetic Groups, Pigments	Quinone cofactors	Tocopherol Biosynthesis	4-hydroxyphenylpyruvate dioxygenase (EC 1.13.11.27) - #4	0.00861224	0.0349262	0.0605222	0.0605222	0	0	0	0	0	0	0.0192049	0	0	0	0	0	0	0	0	0.0653595	0	0.0962927	0	0	0	0	0.0167701	0.0662691	0.0380518	0	0	0	0	0.0609013	0.1638	0.0551876	0	0.148588	0.053952	0.21322	0	0	0.021699	0	0	0
Cofactors, Vitamins, Prosthetic Groups, Pigments	Quinone cofactors	Plastoquinone Biosynthesis	4-hydroxyphenylpyruvate dioxygenase (EC 1.13.11.27) - #3	0.00861224	0.0349262	0.0605222	0.0605222	0	0	0	0	0	0	0.0192049	0	0	0	0	0	0	0	0	0.0653595	0	0.0962927	0	0	0	0	0.0167701	0.0662691	0.0380518	0	0	0	0	0.0609013	0.1638	0.0551876	0	0.148588	0.053952	0.21322	0	0	0.021699	0	0	0
Cofactors, Vitamins, Prosthetic Groups, Pigments	Folate and pterines	Pterin metabolism 3	4-hydroxyphenylpyruvate dioxygenase (EC 1.13.11.27) - #2	0.00861224	0.0349262	0.0605222	0.0605222	0	0	0	0	0	0	0.0192049	0	0	0	0	0	0	0	0	0.0653595	0	0.0962927	0	0	0	0	0.0167701	0.0662691	0.0380518	0	0	0	0	0.0609013	0.1638	0.0551876	0	0.148588	0.053952	0.21322	0	0	0.021699	0	0	0
Cofactors, Vitamins, Prosthetic Groups, Pigments	Folate and pterines	Pterin carbinolamine dehydratase	4-hydroxyphenylpyruvate dioxygenase (EC 1.13.11.27) - #1	0.00861224	0.0349262	0.0605222	0.0605222	0	0	0	0	0	0	0.0192049	0	0	0	0	0	0	0	0	0.0653595	0	0.0962927	0	0	0	0	0.0167701	0.0662691	0.0380518	0	0	0	0	0.0609013	0.1638	0.0551876	0	0.148588	0.053952	0.21322	0	0	0.021699	0	0	0
Cofactors, Vitamins, Prosthetic Groups, Pigments	Folate and pterines	Pterin carbinolamine dehydratase	Fumarylacetoacetase (EC 3.7.1.2)	0	0.0144229	0.0606213	0.0606213	0	0	0	0	0	0	0	0	0	0	0	0	0	0	0	0	0	0	0	0	0	0	0.0167701	0	0	0	0	0	0	0.0203004	0.0819001	0.0551876	0	0.148588	0.026976	0	0	0	0.0108495	0	0	0
Cofactors, Vitamins, Prosthetic Groups, Pigments	Folate and pterines	Pterin metabolism 3	Fumarylacetoacetase (EC 3.7.1.2) - #1	0	0.0144229	0.0606213	0.0606213	0	0	0	0	0	0	0	0	0	0	0	0	0	0	0	0	0	0	0	0	0	0	0.0167701	0	0	0	0	0	0	0.0203004	0.0819001	0.0551876	0	0.148588	0.026976	0	0	0	0.0108495	0	0	0
Cofactors, Vitamins, Prosthetic Groups, Pigments	Tetrapyrroles	Heme and Siroheme Biosynthesis	Protoporphyrinogen IX oxidase, aerobic, HemY (EC 1.3.3.4)	0	0.0165102	0.0614902	0.0614902	0	0	0	0	0	0	0	0	0	0	0	0	0	0	0	0	0	0	0	0	0	0	0.0503102	0.0331345	0	0.0322061	0	0	0.097371	0	0	0	0	0	0	0	0	0	0.0108495	0.171527	0	0
Cofactors, Vitamins, Prosthetic Groups, Pigments	Tetrapyrroles	Coenzyme B12 biosynthesis	ChlD component of cobalt chelatase involved in B12 biosynthesis	0	0.0112811	0.0645158	0.0645158	0	0	0	0	0	0	0	0	0	0	0	0	0	0	0	0	0	0	0	0	0	0.0531632	0.0670803	0	0	0.0644122	0	0	0.097371	0	0	0	0	0	0	0	0	0	0	0	0	0
Cofactors, Vitamins, Prosthetic Groups, Pigments	Folate and pterines	Folate Biosynthesis	Thymidylate synthase (EC 2.1.1.45)	0.0295114	0.0628169	0.0679589	0.0679589	0	0	0.0997009	0	0	0.0360231	0.0192049	0.0619003	0.0470367	0.0205128	0.0304136	0	0.0951475	0	0	0.0653595	0	0.144439	0	0	0	0.0797448	0.0503102	0.0662691	0.0380518	0.0966184	0.101215	0	0.194742	0.0406009	0.3276	0.0551876	0	0.0742942	0.080928	0	0.0625391	0	0.0433981	0	0.0989609	0.0563222
Cofactors, Vitamins, Prosthetic Groups, Pigments	Lipoic acid	Lipoic acid metabolism	Lipoate-protein ligase A	0.0280974	0.00690401	0.0683936	0.0683936	0	0.0956938	0.199402	0	0	0.0180115	0.0960246	0.0928505	0.0470367	0.0410256	0	0	0	0	0	0	0	0	0	0	0	0	0	0	0	0	0	0	0	0	0.0819001	0	0	0	0	0	0.0625391	0	0	0	0	0.0281611
Cofactors, Vitamins, Prosthetic Groups, Pigments	Tetrapyrroles	Coenzyme B12 biosynthesis	CobN component of cobalt chelatase involved in B12 biosynthesis	0	0.00737001	0.0688265	0.0688265	0	0	0	0	0	0	0	0	0	0	0	0	0	0	0	0	0	0	0	0	0	0.0531632	0.0335402	0.0331345	0	0.0644122	0	0	0	0	0	0	0	0	0	0	0	0	0	0	0	0
Cofactors, Vitamins, Prosthetic Groups, Pigments	Folate and pterines	Folate Biosynthesis	Substrate-specific component FolT of folate ECF transporter	0.00366353	0	0.068922	0.068922	0	0	0	0	0	0.0180115	0.0384098	0	0	0.0205128	0	0	0	0	0	0	0	0	0	0	0	0	0	0	0	0	0	0	0	0	0	0	0	0	0	0	0	0	0	0	0	0
Cofactors, Vitamins, Prosthetic Groups, Pigments	Folate and pterines	YgfZ	Putative hydrolase in cluster with formaldehyde/S-nitrosomycothiol reductase MscR	0	0.0093058	0.0694593	0.0694593	0	0	0	0	0	0	0	0	0	0	0	0	0	0	0	0	0	0	0	0	0	0.0531632	0.0167701	0.0331345	0	0.0322061	0	0	0.097371	0	0	0	0	0	0	0	0	0	0	0	0	0
Cofactors, Vitamins, Prosthetic Groups, Pigments	Folate and pterines	YgfZ-Iron	Tricarboxylate transport protein TctB	0	0.00301936	0.0703519	0.0703519	0	0	0	0	0	0	0	0	0	0	0	0	0	0	0	0	0	0	0	0	0	0	0	0	0	0	0	0	0	0.0203004	0	0	0	0	0.026976	0	0	0	0.0108495	0	0	0
Cofactors, Vitamins, Prosthetic Groups, Pigments	Tetrapyrroles	Coenzyme B12 biosynthesis	Vitamin B12 ABC transporter, ATPase component BtuD	0.00697184	0.00107904	0.0709489	0.0709489	0	0	0	0	0	0.0360231	0.0384098	0.0309502	0	0.0410256	0	0	0	0	0	0	0	0	0	0	0	0	0	0	0	0	0	0	0	0	0	0	0	0	0.026976	0	0	0	0	0	0	0
Cofactors, Vitamins, Prosthetic Groups, Pigments	Folate and pterines	YgfZ	Cysteine desulfurase (EC 2.8.1.7), SufS subfamily - #1	0.00542904	0.018986	0.0772233	0.0772233	0	0	0	0	0	0.0360231	0	0.0309502	0.0470367	0	0	0	0	0	0	0	0	0	0	0	0	0.0265816	0.0335402	0.0662691	0	0.0644122	0	0.104275	0	0	0	0	0	0	0	0	0.0625391	0	0.0325486	0	0	0.0844832
Cofactors, Vitamins, Prosthetic Groups, Pigments	Pyridoxine	Pyridoxin (Vitamin B6) Biosynthesis	Pyridoxamine 5'-phosphate oxidase (EC 1.4.3.5)	0.00229268	0.0125798	0.0818645	0.0818645	0	0	0	0	0	0	0	0	0	0	0	0	0	0	0	0	0	0.0481464	0	0	0	0	0.0503102	0	0.0190259	0	0	0	0	0.0406009	0	0	0	0	0.080928	0	0	0	0.0108495	0	0	0
Cofactors, Vitamins, Prosthetic Groups, Pigments	Folate and pterines	Molybdenum cofactor biosynthesis	Molybdopterin biosynthesis Mog protein, molybdochelatase	0.00422283	0.000694324	0.0829851	0.0829851	0	0	0	0	0	0.0180115	0.0192049	0.0309502	0	0.0205128	0	0	0	0	0	0	0	0	0	0	0	0	0	0	0	0	0	0	0	0	0	0	0	0	0	0	0	0	0	0	0	0
Cofactors, Vitamins, Prosthetic Groups, Pigments	Tetrapyrroles	Coenzyme B12 biosynthesis	Predicted alpha-ribazole-5-phosphate synthase CblS for cobalamin biosynthesis	0	0.00819141	0.0832826	0.0832826	0	0	0	0	0	0	0	0	0	0	0	0	0	0	0	0	0	0	0	0	0	0.0531632	0	0.0331345	0	0.0322061	0	0	0	0	0	0	0	0	0	0	0	0	0	0	0	0
Cofactors, Vitamins, Prosthetic Groups, Pigments	Folate and pterines	5-FCL-like protein	Thiaminase II (EC 3.5.99.2) - #1	0.00675869	0.0314034	0.0850027	0.0850027	0	0	0	0	0	0	0.0192049	0.0619003	0	0	0.0608273	0	0	0	0	0	0	0	0	0	0	0.132908	0.0670803	0.0662691	0.0190259	0.0966184	0	0	0	0.0203004	0	0	0	0	0	0	0.0312695	0.273973	0	0	0.0494805	0.0281611
Cofactors, Vitamins, Prosthetic Groups, Pigments	Cofactors, Vitamins, Prosthetic Groups, Pigments	Thiamin biosynthesis	Thiaminase II (EC 3.5.99.2)	0.00675869	0.0314034	0.0850027	0.0850027	0	0	0	0	0	0	0.0192049	0.0619003	0	0	0.0608273	0	0	0	0	0	0	0	0	0	0	0.132908	0.0670803	0.0662691	0.0190259	0.0966184	0	0	0	0.0203004	0	0	0	0	0	0	0.0312695	0.273973	0	0	0.0494805	0.0281611
Cofactors, Vitamins, Prosthetic Groups, Pigments	Folate and pterines	YgfZ	Phosphoribosyl-AMP cyclohydrolase (EC 3.5.4.19) - #1	0.00397005	0.0127372	0.087403	0.087403	0	0	0	0	0	0.0180115	0	0	0	0	0	0	0	0	0	0.0653595	0	0	0	0	0	0.0265816	0.0335402	0.0331345	0.0190259	0	0	0	0	0.0203004	0	0	0	0.0742942	0.026976	0	0	0	0.021699	0	0	0.0281611
Cofactors, Vitamins, Prosthetic Groups, Pigments	Tetrapyrroles	Coenzyme B12 biosynthesis	Cobalt-precorrin-4 C11-methyltransferase (EC 2.1.1.133) - #1	0	0.00898805	0.0884011	0.0884011	0	0	0	0	0	0	0	0	0	0	0	0	0	0	0	0	0	0	0	0	0	0.0531632	0.0167701	0.0331345	0	0	0	0.104275	0	0	0	0	0	0	0	0	0	0	0	0	0	0
Cofactors, Vitamins, Prosthetic Groups, Pigments	Tetrapyrroles	Cobalamin synthesis	Cobalt-precorrin-4 C11-methyltransferase (EC 2.1.1.133)	0	0.00898805	0.0884011	0.0884011	0	0	0	0	0	0	0	0	0	0	0	0	0	0	0	0	0	0	0	0	0	0.0531632	0.0167701	0.0331345	0	0	0	0.104275	0	0	0	0	0	0	0	0	0	0	0	0	0	0
Cofactors, Vitamins, Prosthetic Groups, Pigments	Folate and pterines	YgfZ	Cysteine desulfurase (EC 2.8.1.7), IscS subfamily - #1	0.0046943	0.000812018	0.0894102	0.0894102	0	0	0	0	0	0.0180115	0.0192049	0.0309502	0	0	0.0304136	0	0	0	0	0	0	0	0	0	0	0	0	0	0	0	0	0	0	0.0203004	0	0	0	0	0	0	0	0	0	0	0	0
Cofactors, Vitamins, Prosthetic Groups, Pigments	Tetrapyrroles	Cobalamin synthesis	Cobalt-precorrin-6x reductase (EC 1.3.1.54)	0	0.00953646	0.0926683	0.0926683	0	0	0	0	0	0	0	0	0	0	0	0	0	0	0	0	0	0	0	0	0	0.0797448	0	0.0331345	0	0	0	0	0.097371	0	0	0	0	0	0	0	0	0	0	0	0	0.0281611
Cofactors, Vitamins, Prosthetic Groups, Pigments	Tetrapyrroles	Coenzyme B12 biosynthesis	Cobalt-precorrin-6x reductase (EC 1.3.1.54) - #1	0	0.00953646	0.0926683	0.0926683	0	0	0	0	0	0	0	0	0	0	0	0	0	0	0	0	0	0	0	0	0	0.0797448	0	0.0331345	0	0	0	0	0.097371	0	0	0	0	0	0	0	0	0	0	0	0	0.0281611
Cofactors, Vitamins, Prosthetic Groups, Pigments	NAD and NADP	NAD consumption	DNA ligase (EC 6.5.1.2) - #1	0.0121944	0.0309872	0.0931754	0.0931754	0	0	0	0	0	0.0360231	0.0768197	0.0619003	0	0.0205128	0.0608273	0	0	0	0	0	0	0	0	0	0	0	0	0.0662691	0.0380518	0	0	0	0	0.0203004	0.0819001	0.0551876	0	0.0742942	0.026976	0	0.0312695	0	0.119345	0	0.148441	0.112644
Cofactors, Vitamins, Prosthetic Groups, Pigments	Tetrapyrroles	Coenzyme B12 biosynthesis	Substrate-specific component CbiM of cobalt ECF transporter	0	0.00563594	0.0938877	0.0938877	0	0	0	0	0	0	0	0	0	0	0	0	0	0	0	0	0	0	0	0	0	0.0265816	0.0167701	0.0331345	0	0.0644122	0	0	0	0	0	0	0	0	0	0	0	0	0	0	0	0
Cofactors, Vitamins, Prosthetic Groups, Pigments	Tetrapyrroles	Cobalamin synthesis	Cobalamin synthase	0	0.00453238	0.0967322	0.0967322	0	0	0	0	0	0	0	0	0	0	0	0	0	0	0	0	0	0	0	0	0	0	0	0	0	0	0	0	0	0.0203004	0	0	0	0	0.053952	0	0	0	0.021699	0	0	0
Cofactors, Vitamins, Prosthetic Groups, Pigments	Tetrapyrroles	Coenzyme B12 biosynthesis	Cobalamin synthase - #1	0	0.00453238	0.0967322	0.0967322	0	0	0	0	0	0	0	0	0	0	0	0	0	0	0	0	0	0	0	0	0	0	0	0	0	0	0	0	0	0.0203004	0	0	0	0	0.053952	0	0	0	0.021699	0	0	0
Cofactors, Vitamins, Prosthetic Groups, Pigments	Folate and pterines	Pterin metabolism 3	Acetoacetyl-CoA synthetase (EC 6.2.1.16) - #3	0	0.00702501	0.0972679	0.0972679	0	0	0	0	0	0	0	0	0	0	0	0	0	0	0	0	0	0	0	0	0	0	0	0	0.0761035	0	0	0	0	0	0	0.0551876	0	0	0.026976	0	0	0	0	0	0	0
Cofactors, Vitamins, Prosthetic Groups, Pigments	Pyridoxine	Pyridoxin (Vitamin B6) Biosynthesis	Predicted transcriptional regulator of pyridoxine metabolism	0.00783961	0.0216049	0.0973164	0.0973164	0	0.0956938	0	0	0	0.0180115	0	0	0	0.0205128	0.0304136	0	0	0	0	0	0	0	0	0	0	0	0.0838504	0	0	0	0	0	0	0.0406009	0.0819001	0.0551876	0	0.0742942	0	0	0.0312695	0	0.021699	0	0.0494805	0.0844832
Cofactors, Vitamins, Prosthetic Groups, Pigments	Folate and pterines	Molybdenum cofactor biosynthesis	Molybdenum cofactor biosynthesis protein MoaD	0.00091452	0.00844344	0.0982282	0.0982282	0	0	0	0	0	0	0.0192049	0	0	0	0	0	0	0	0	0	0	0	0	0	0	0	0.0167701	0	0	0	0	0	0	0.0406009	0	0	0	0	0.053952	0	0	0	0.021699	0	0	0
Cofactors, Vitamins, Prosthetic Groups, Pigments	NAD and NADP	NAD and NADP cofactor biosynthesis global	Amidases related to nicotinamidase	0	0.0116917	0.0988916	0.0988916	0	0	0	0	0	0	0	0	0	0	0	0	0	0	0	0	0	0	0	0	0	0	0.0167701	0	0	0	0	0	0	0.0609013	0	0	0	0.148588	0.026976	0	0	0	0.021699	0	0	0
Cofactors, Vitamins, Prosthetic Groups, Pigments	NAD and NADP	NAD and NADP cofactor biosynthesis global	Ribosylnicotinamide kinase (EC 2.7.1.22)	0.00245062	0.0141265	0.0997259	0.0997259	0	0	0	0	0	0	0	0.0309502	0	0.0205128	0	0	0	0	0	0	0	0	0	0	0	0.0265816	0.0167701	0.0662691	0.0380518	0	0.101215	0.104275	0	0	0	0	0	0	0	0	0	0	0	0	0	0
Cofactors, Vitamins, Prosthetic Groups, Pigments	Quinone cofactors	Ubiquinone Biosynthesis	NAD(P)H-flavin reductase (EC 1.5.1.29) (EC 1.16.1.3)	0.00733667	0	0.104189	0.104189	0	0	0	0	0	0	0.0384098	0	0	0.0205128	0	0	0.0951475	0	0	0	0	0	0	0	0	0	0	0	0	0	0	0	0	0	0	0	0	0	0	0	0	0	0	0	0	0
Cofactors, Vitamins, Prosthetic Groups, Pigments	Folate and pterines	5-FCL-like protein	Dihydrolipoamide dehydrogenase (EC 1.8.1.4) - #4	0.0328762	0.0682313	0.104607	0.104607	0	0	0.0997009	0	0	0.0180115	0.0768197	0.0928505	0.070555	0.0205128	0.121655	0	0.190295	0	0	0	0	0	0	0	0	0.212653	0.0838504	0.132538	0.0190259	0.193237	0.101215	0.208551	0	0	0	0	0	0	0.026976	0	0	0	0.0542476	0	0.0989609	0.225289
Cofactors, Vitamins, Prosthetic Groups, Pigments	Riboflavin, FMN, FAD	Riboflavin, FMN and FAD metabolism	6,7-dimethyl-8-ribityllumazine synthase (EC 2.5.1.9)	0.00229268	0.0113286	0.108905	0.108905	0	0	0	0	0	0	0	0	0	0	0	0	0	0	0	0	0	0.0481464	0	0	0	0	0	0	0.0570776	0.0644122	0	0	0	0.0203004	0.0819001	0	0	0	0.026976	0	0	0	0.0325486	0	0	0
Cofactors, Vitamins, Prosthetic Groups, Pigments	Cofactors, Vitamins, Prosthetic Groups, Pigments	Thiamin biosynthesis	Thiazole biosynthesis protein ThiG	0.00407817	0.011208	0.112635	0.112635	0	0	0	0	0	0.0360231	0.0192049	0	0	0	0.0304136	0	0	0	0	0	0	0	0	0	0	0.0265816	0.0335402	0.0331345	0	0.0322061	0	0	0	0.0203004	0	0	0	0	0	0	0	0	0.0433981	0	0	0.0563222
Cofactors, Vitamins, Prosthetic Groups, Pigments	Pyridoxine	Pyridoxin (Vitamin B6) Biosynthesis	Phosphoserine aminotransferase (EC 2.6.1.52) - #2	0.00948507	0.0266368	0.113123	0.113123	0	0	0	0	0	0.0180115	0	0.0309502	0.0235183	0	0.0304136	0	0	0	0	0	0	0.0962927	0	0	0	0.0797448	0.10062	0.165673	0	0.0644122	0	0	0	0.0609013	0	0	0	0	0	0	0	0	0.0325486	0	0	0.0563222
Cofactors, Vitamins, Prosthetic Groups, Pigments	Folate and pterines	YgfZ	S-(hydroxymethyl)glutathione dehydrogenase (EC 1.1.1.284)	0.0418188	0.00667701	0.114636	0.114636	0	0	0	0	0	0.0360231	0.0192049	0.0619003	0	0.0205128	0.0304136	0	0.190295	0	0	0	0	0.0481464	0	0	0.471698	0.0531632	0	0	0.0761035	0	0	0	0	0.0203004	0	0	0	0	0	0	0	0	0	0	0	0
Cofactors, Vitamins, Prosthetic Groups, Pigments	Folate and pterines	Molybdenum cofactor biosynthesis	Molybdopterin-guanine dinucleotide biosynthesis protein MobA	0.00664245	0.0261851	0.11655	0.11655	0	0	0	0	0	0	0.0576147	0.0309502	0	0.0205128	0.0304136	0	0	0	0	0	0	0	0	0	0	0	0	0	0.0190259	0	0	0	0	0.0203004	0	0.0551876	0	0	0.026976	0.21322	0.0312695	0	0.021699	0.171527	0	0
Cofactors, Vitamins, Prosthetic Groups, Pigments	Folate and pterines	YgfZ	Glutamate--cysteine ligase (EC 6.3.2.2)	0.00233151	0.0120316	0.117429	0.117429	0	0	0	0	0	0.0180115	0	0.0309502	0	0	0	0	0	0	0	0	0	0	0	0	0	0	0	0	0.0380518	0	0	0	0	0.0203004	0	0	0	0	0.026976	0	0	0	0	0	0.0989609	0.0281611
Cofactors, Vitamins, Prosthetic Groups, Pigments	Riboflavin, FMN, FAD	Riboflavin, FMN and FAD metabolism	Riboflavin transporter PnuX	0	0.00336131	0.118787	0.118787	0	0	0	0	0	0	0	0	0	0	0	0	0	0	0	0	0	0	0	0	0	0	0.0335402	0.0331345	0	0	0	0	0	0	0	0	0	0	0	0	0	0	0	0	0	0
Cofactors, Vitamins, Prosthetic Groups, Pigments	Tetrapyrroles	Heme and Siroheme Biosynthesis	Uroporphyrinogen-III synthase (EC 4.2.1.75)	0.00738664	0.0246017	0.11907	0.11907	0	0	0	0	0	0	0.0192049	0	0.070555	0	0	0	0	0	0	0.0653595	0	0	0	0	0	0.0265816	0.0503102	0	0.0190259	0.0322061	0	0	0	0.0609013	0	0	0	0.148588	0.026976	0	0	0	0.021699	0	0	0
Cofactors, Vitamins, Prosthetic Groups, Pigments	Tetrapyrroles	Cobalamin synthesis	Cobalt-precorrin-8x methylmutase (EC 5.4.1.2)	0	0.00613512	0.119148	0.119148	0	0	0	0	0	0	0	0	0	0	0	0	0	0	0	0	0	0	0	0	0	0.0531632	0.0670803	0.0331345	0	0	0	0	0	0	0	0	0	0	0	0	0	0	0	0	0	0
Cofactors, Vitamins, Prosthetic Groups, Pigments	Tetrapyrroles	Coenzyme B12 biosynthesis	Cobalt-precorrin-8x methylmutase (EC 5.4.1.2) - #1	0	0.00613512	0.119148	0.119148	0	0	0	0	0	0	0	0	0	0	0	0	0	0	0	0	0	0	0	0	0	0.0531632	0.0670803	0.0331345	0	0	0	0	0	0	0	0	0	0	0	0	0	0	0	0	0	0
Cofactors, Vitamins, Prosthetic Groups, Pigments	NAD and NADP	NAD regulation	Niacin transporter NiaP - #1	0	0.00328443	0.119321	0.119321	0	0	0	0	0	0	0	0	0	0	0	0	0	0	0	0	0	0	0	0	0	0	0.0167701	0.0331345	0	0.0322061	0	0	0	0	0	0	0	0	0	0	0	0	0	0	0	0
Cofactors, Vitamins, Prosthetic Groups, Pigments	NAD and NADP	NAD and NADP cofactor biosynthesis global	Niacin transporter NiaP	0	0.00328443	0.119321	0.119321	0	0	0	0	0	0	0	0	0	0	0	0	0	0	0	0	0	0	0	0	0	0	0.0167701	0.0331345	0	0.0322061	0	0	0	0	0	0	0	0	0	0	0	0	0	0	0	0
Cofactors, Vitamins, Prosthetic Groups, Pigments	Folate and pterines	YgfZ-Iron	Iron-binding ferritin-like antioxidant protein	0.0373073	0.0180386	0.119934	0.119934	0	0.0956938	0.0997009	0	0	0.0720461	0.0576147	0.154751	0.070555	0.0410256	0.0304136	0	0	0	0	0.0653595	0	0.0962927	0	0	0	0	0.0167701	0	0.0570776	0	0	0	0	0.0406009	0.0819001	0	0	0	0	0	0.0312695	0	0.021699	0	0	0.0281611
Cofactors, Vitamins, Prosthetic Groups, Pigments	Tetrapyrroles	Heme and Siroheme Biosynthesis	Protoporphyrinogen IX oxidase, oxygen-independent, HemG (EC 1.3.-.-) - #1	0.00177221	0	0.119979	0.119979	0	0	0	0	0	0.0180115	0.0192049	0	0	0	0	0	0	0	0	0	0	0	0	0	0	0	0	0	0	0	0	0	0	0	0	0	0	0	0	0	0	0	0	0	0	0
Cofactors, Vitamins, Prosthetic Groups, Pigments	Riboflavin, FMN, FAD	Flavodoxin	Flavodoxin 1	0.00209672	0	0.120701	0.120701	0	0	0	0	0	0	0	0	0.0235183	0.0205128	0	0	0	0	0	0	0	0	0	0	0	0	0	0	0	0	0	0	0	0	0	0	0	0	0	0	0	0	0	0	0	0
Cofactors, Vitamins, Prosthetic Groups, Pigments	Folate and pterines	Pterin biosynthesis	Dihydropteridine reductase (EC 1.5.1.34)	0.0031892	0	0.120915	0.120915	0	0	0	0	0	0.0360231	0	0.0309502	0	0	0	0	0	0	0	0	0	0	0	0	0	0	0	0	0	0	0	0	0	0	0	0	0	0	0	0	0	0	0	0	0	0
Cofactors, Vitamins, Prosthetic Groups, Pigments	Coenzyme A	Coenzyme A Biosynthesis	2-dehydropantoate 2-reductase (EC 1.1.1.169)	0.109797	0.0432073	0.121005	0.121005	0	0.191388	0.199402	0	0	0.0360231	0.115229	0.0619003	0.0940734	0.102564	0.152068	0	0.0951475	0.917431	0	0.196078	0	0.144439	0	0	0	0	0.0335402	0	0.0570776	0	0	0	0	0.162404	0.1638	0.220751	0	0.0742942	0.080928	0	0.125078	0	0.0433981	0	0.0494805	0
Cofactors, Vitamins, Prosthetic Groups, Pigments	Folate and pterines	YgfZ	Formaldehyde dehydrogenase MscR, NAD/mycothiol-dependent (EC 1.2.1.66)	0	0.0140964	0.121555	0.121555	0	0	0	0	0	0	0	0	0	0	0	0	0	0	0	0	0	0	0	0	0	0.0265816	0.0335402	0.0331345	0	0.0644122	0	0	0.194742	0	0	0	0	0	0	0	0	0	0	0	0	0
Cofactors, Vitamins, Prosthetic Groups, Pigments	Quinone cofactors	Menaquinone Biosynthesis via Futalosine -- gjo	3-polyprenyl-4-hydroxybenzoate carboxy-lyase (EC 4.1.1.-)	0.0124003	0.0300217	0.122967	0.122967	0	0	0	0	0	0.0180115	0.0192049	0	0	0.0615385	0	0	0	0	0	0.0653595	0	0.0962927	0	0	0	0	0.0503102	0	0	0	0	0	0	0.0203004	0.0819001	0.110375	0	0.0742942	0.053952	0	0.0312695	0	0.0325486	0	0.0494805	0
Cofactors, Vitamins, Prosthetic Groups, Pigments	Folate and pterines	YgfZ	Molybdenum cofactor biosynthesis protein MoaA - #1	0.0158368	0.00561098	0.123487	0.123487	0	0.0956938	0	0	0	0.0540346	0	0.0309502	0.070555	0.0205128	0.0608273	0	0	0	0	0	0	0	0	0	0	0	0	0	0	0	0	0	0	0	0	0	0	0	0.026976	0	0.0312695	0	0.0325486	0	0.0494805	0
Cofactors, Vitamins, Prosthetic Groups, Pigments	Folate and pterines	Molybdenum cofactor biosynthesis	Molybdenum cofactor biosynthesis protein MoaA	0.0158368	0.00561098	0.123487	0.123487	0	0.0956938	0	0	0	0.0540346	0	0.0309502	0.070555	0.0205128	0.0608273	0	0	0	0	0	0	0	0	0	0	0	0	0	0	0	0	0	0	0	0	0	0	0	0.026976	0	0.0312695	0	0.0325486	0	0.0494805	0
Cofactors, Vitamins, Prosthetic Groups, Pigments	Tetrapyrroles	Coenzyme B12 biosynthesis	ChlI component of cobalt chelatase involved in B12 biosynthesis	0	0.0313768	0.127343	0.127343	0	0	0	0	0	0	0	0	0	0	0	0	0	0	0	0	0	0	0	0	0	0.0531632	0.0838504	0.0331345	0	0.0644122	0	0	0.097371	0	0	0	0.452489	0	0	0	0	0	0	0	0	0
Cofactors, Vitamins, Prosthetic Groups, Pigments	Tetrapyrroles	Coenzyme B12 biosynthesis	Duplicated ATPase component CbrU of energizing module of predicted cobalamin ECF transporter	0	0.00262369	0.129131	0.129131	0	0	0	0	0	0	0	0	0	0	0	0	0	0	0	0	0	0	0	0	0	0.0265816	0	0	0	0	0	0	0	0	0	0	0	0	0	0	0	0	0.0108495	0	0	0.0281611
Cofactors, Vitamins, Prosthetic Groups, Pigments	Coenzyme A	Coenzyme A Biosynthesis	Aspartate 1-decarboxylase (EC 4.1.1.11)	0.0142042	0.00421454	0.130578	0.130578	0	0.0956938	0.0997009	0	0	0.0180115	0	0.0309502	0.0235183	0	0.0304136	0	0	0	0	0	0	0	0	0	0	0	0	0	0.0190259	0	0	0	0	0.0203004	0	0.0551876	0	0	0	0	0	0	0.0108495	0	0	0
Cofactors, Vitamins, Prosthetic Groups, Pigments	Quinone cofactors	Menaquinone and Phylloquinone Biosynthesis	2-succinyl-6-hydroxy-2,4-cyclohexadiene-1-carboxylate synthase (EC 4.2.99.20)	0.00238834	0	0.130587	0.130587	0	0	0	0	0	0	0.0192049	0.0309502	0	0	0	0	0	0	0	0	0	0	0	0	0	0	0	0	0	0	0	0	0	0	0	0	0	0	0	0	0	0	0	0	0	0
Cofactors, Vitamins, Prosthetic Groups, Pigments	Lipoic acid	Lipoic acid metabolism	Proposed lipoate regulatory protein YbeD	0.00238834	0	0.130587	0.130587	0	0	0	0	0	0	0.0192049	0.0309502	0	0	0	0	0	0	0	0	0	0	0	0	0	0	0	0	0	0	0	0	0	0	0	0	0	0	0	0	0	0	0	0	0	0
Cofactors, Vitamins, Prosthetic Groups, Pigments	Tetrapyrroles	Heme and Siroheme Biosynthesis	Hemoprotein HemQ, essential component of heme biosynthetic pathway in Gram-positive bacteria	0	0.0127871	0.131525	0.131525	0	0	0	0	0	0	0	0	0	0	0	0	0	0	0	0	0	0	0	0	0	0	0.0167701	0	0	0	0	0	0	0	0.0819001	0	0	0	0	0	0	0	0	0.171527	0.0494805	0
Cofactors, Vitamins, Prosthetic Groups, Pigments	Folate and pterines	p-Aminobenzoyl-Glutamate Utilization	Catalyzes the cleavage of p-aminobenzoyl-glutamate to p-aminobenzoate and glutamate, subunit B	0.00230596	0	0.132682	0.132682	0	0	0	0	0	0.0180115	0	0	0	0	0.0304136	0	0	0	0	0	0	0	0	0	0	0	0	0	0	0	0	0	0	0	0	0	0	0	0	0	0	0	0	0	0	0
Cofactors, Vitamins, Prosthetic Groups, Pigments	Cofactors, Vitamins, Prosthetic Groups, Pigments	Thiamin biosynthesis	Thiamine kinase (EC 2.7.1.89)	0.00404689	0	0.134273	0.134273	0	0	0	0	0	0.0540346	0	0.0309502	0	0	0	0	0	0	0	0	0	0	0	0	0	0	0	0	0	0	0	0	0	0	0	0	0	0	0	0	0	0	0	0	0	0
Cofactors, Vitamins, Prosthetic Groups, Pigments	Folate and pterines	5-FCL-like protein	Thiamine kinase (EC 2.7.1.89) - #1	0.00404689	0	0.134273	0.134273	0	0	0	0	0	0.0540346	0	0.0309502	0	0	0	0	0	0	0	0	0	0	0	0	0	0	0	0	0	0	0	0	0	0	0	0	0	0	0	0	0	0	0	0	0	0
Cofactors, Vitamins, Prosthetic Groups, Pigments	Biotin	Biotin biosynthesis	Pimeloyl-CoA synthase (EC 6.2.1.14)	0	0.00422917	0.134612	0.134612	0	0	0	0	0	0	0	0	0	0	0	0	0	0	0	0	0	0	0	0	0	0.0531632	0.0335402	0	0.0190259	0	0	0	0	0	0	0	0	0	0	0	0	0	0	0	0	0
Cofactors, Vitamins, Prosthetic Groups, Pigments	Riboflavin, FMN, FAD	Riboflavin, FMN and FAD metabolism	Riboflavin synthase alpha chain (EC 2.5.1.9)	0	0.00729085	0.13498	0.13498	0	0	0	0	0	0	0	0	0	0	0	0	0	0	0	0	0	0	0	0	0	0	0	0	0	0	0.101215	0	0	0.0203004	0	0	0	0	0	0	0	0	0.0433981	0	0	0
Cofactors, Vitamins, Prosthetic Groups, Pigments	Tetrapyrroles	Cobalamin synthesis	Cobalt-precorrin-6 synthase, anaerobic	0	0.0148505	0.142229	0.142229	0	0	0	0	0	0	0	0	0	0	0	0	0	0	0	0	0	0	0	0	0	0	0	0.0331345	0	0.0322061	0	0.208551	0.097371	0	0	0	0	0	0	0	0	0	0	0	0	0
Cofactors, Vitamins, Prosthetic Groups, Pigments	Tetrapyrroles	Coenzyme B12 biosynthesis	Cobalt-precorrin-6 synthase, anaerobic - #1	0	0.0148505	0.142229	0.142229	0	0	0	0	0	0	0	0	0	0	0	0	0	0	0	0	0	0	0	0	0	0	0	0.0331345	0	0.0322061	0	0.208551	0.097371	0	0	0	0	0	0	0	0	0	0	0	0	0
Cofactors, Vitamins, Prosthetic Groups, Pigments	Biotin	Biotin biosynthesis	Dethiobiotin synthetase (EC 6.3.3.3)	0.0435972	0.00369033	0.143056	0.143056	0	0	0	0	0	0	0	0	0	0.0410256	0.0304136	0	0.285442	0	0	0	0	0	0.558659	0	0	0	0.0167701	0	0	0	0	0	0	0.0203004	0	0.0551876	0	0	0	0	0	0	0	0	0	0
Cofactors, Vitamins, Prosthetic Groups, Pigments	NAD and NADP	NAD and NADP cofactor biosynthesis global	Substrate-specific component NiaX of predicted niacin ECF transporter	0.00651987	0	0.145902	0.145902	0	0	0.0997009	0	0	0.0180115	0.0192049	0	0	0	0	0	0	0	0	0	0	0	0	0	0	0	0	0	0	0	0	0	0	0	0	0	0	0	0	0	0	0	0	0	0	0
Cofactors, Vitamins, Prosthetic Groups, Pigments	Tetrapyrroles	Cobalamin synthesis	Cobalt-precorrin-2 C20-methyltransferase (EC 2.1.1.130)	0	0.00929192	0.146002	0.146002	0	0	0	0	0	0	0	0	0	0	0	0	0	0	0	0	0	0	0	0	0	0.0531632	0.0503102	0	0	0.128824	0	0	0	0	0	0	0	0	0	0	0	0	0	0	0	0
Cofactors, Vitamins, Prosthetic Groups, Pigments	Tetrapyrroles	Coenzyme B12 biosynthesis	Cobalt-precorrin-2 C20-methyltransferase (EC 2.1.1.130) - #1	0	0.00929192	0.146002	0.146002	0	0	0	0	0	0	0	0	0	0	0	0	0	0	0	0	0	0	0	0	0	0.0531632	0.0503102	0	0	0.128824	0	0	0	0	0	0	0	0	0	0	0	0	0	0	0	0
Cofactors, Vitamins, Prosthetic Groups, Pigments	Tetrapyrroles	Coenzyme B12 biosynthesis	Sirohydrochlorin cobaltochelatase (EC 4.99.1.3)	0.00311236	0.0130538	0.146799	0.146799	0	0	0	0	0	0	0	0	0	0	0	0	0	0	0	0.0653595	0	0	0	0	0	0.0265816	0.10062	0.0994036	0.0190259	0.0322061	0	0	0	0.0203004	0	0	0	0	0	0	0	0	0.0108495	0	0	0
Cofactors, Vitamins, Prosthetic Groups, Pigments	NAD and NADP	NAD and NADP cofactor biosynthesis global	NadR transcriptional regulator	0.00245062	0.0120401	0.147038	0.147038	0	0	0	0	0	0	0	0.0309502	0	0.0205128	0	0	0	0	0	0	0	0	0	0	0	0.0265816	0.0167701	0.0331345	0.0190259	0	0.101215	0.104275	0	0	0	0	0	0	0	0	0	0	0	0	0	0
Cofactors, Vitamins, Prosthetic Groups, Pigments	NAD and NADP	NAD regulation	NadR transcriptional regulator - #1	0.00245062	0.0120401	0.147038	0.147038	0	0	0	0	0	0	0	0.0309502	0	0.0205128	0	0	0	0	0	0	0	0	0	0	0	0.0265816	0.0167701	0.0331345	0.0190259	0	0.101215	0.104275	0	0	0	0	0	0	0	0	0	0	0	0	0	0
Cofactors, Vitamins, Prosthetic Groups, Pigments	NAD and NADP	NAD regulation	Nicotinamide-nucleotide adenylyltransferase, NadR family (EC 2.7.7.1) - #1	0.00245062	0.0120401	0.147038	0.147038	0	0	0	0	0	0	0	0.0309502	0	0.0205128	0	0	0	0	0	0	0	0	0	0	0	0.0265816	0.0167701	0.0331345	0.0190259	0	0.101215	0.104275	0	0	0	0	0	0	0	0	0	0	0	0	0	0
Cofactors, Vitamins, Prosthetic Groups, Pigments	NAD and NADP	NAD and NADP cofactor biosynthesis global	Nicotinamide-nucleotide adenylyltransferase, NadR family (EC 2.7.7.1)	0.00245062	0.0120401	0.147038	0.147038	0	0	0	0	0	0	0	0.0309502	0	0.0205128	0	0	0	0	0	0	0	0	0	0	0	0.0265816	0.0167701	0.0331345	0.0190259	0	0.101215	0.104275	0	0	0	0	0	0	0	0	0	0	0	0	0	0
Cofactors, Vitamins, Prosthetic Groups, Pigments	NAD and NADP	NAD and NADP cofactor biosynthesis global	Kynureninase (EC 3.7.1.3) - #1	0	0.00348556	0.151103	0.151103	0	0	0	0	0	0	0	0	0	0	0	0	0	0	0	0	0	0	0	0	0	0	0	0	0	0	0	0	0	0.0203004	0	0	0	0	0	0	0	0	0	0	0.0494805	0
Cofactors, Vitamins, Prosthetic Groups, Pigments	Folate and pterines	Folate Biosynthesis	Thymidylate synthase thyX (EC 2.1.1.-)	0.0490646	0.00382048	0.152997	0.152997	0	0	0	0	0	0	0	0	0	0	0	0	0	0	0	0	0	0	0.558659	0	0.471698	0.0265816	0.0167701	0.0331345	0.0190259	0	0	0	0	0	0	0	0	0	0	0	0	0	0	0	0	0
Cofactors, Vitamins, Prosthetic Groups, Pigments	Tetrapyrroles	Heme and Siroheme Biosynthesis	Uroporphyrinogen III decarboxylase (EC 4.1.1.37)	0.00523091	0.00119502	0.157363	0.157363	0	0	0	0	0	0	0.0384098	0	0	0.0410256	0.0304136	0	0	0	0	0	0	0	0	0	0	0	0	0	0.0190259	0	0	0	0	0	0	0	0	0	0	0	0	0	0.0108495	0	0	0
Cofactors, Vitamins, Prosthetic Groups, Pigments	Coenzyme A	Coenzyme A Biosynthesis	Phosphopantothenoylcysteine decarboxylase (EC 4.1.1.36)	0.0160451	0.00583132	0.159021	0.159021	0	0.0956938	0	0	0	0.0360231	0.0192049	0	0.0940734	0.0615385	0.0304136	0	0	0	0	0	0	0	0	0	0	0.0531632	0	0	0	0.0644122	0	0	0	0	0	0	0	0	0	0	0	0	0.0108495	0	0	0
Cofactors, Vitamins, Prosthetic Groups, Pigments	Folate and pterines	Pterin metabolism 3	Fumarylacetoacetate hydrolase family protein - #1	0.000976801	0.0111465	0.162532	0.162532	0	0	0	0	0	0	0	0	0	0.0205128	0	0	0	0	0	0	0	0	0	0	0	0	0	0.0331345	0.0190259	0	0	0	0	0	0	0	0	0	0.026976	0	0	0	0.0433981	0	0	0
Cofactors, Vitamins, Prosthetic Groups, Pigments	Folate and pterines	Pterin carbinolamine dehydratase	Fumarylacetoacetate hydrolase family protein	0.000976801	0.0111465	0.162532	0.162532	0	0	0	0	0	0	0	0	0	0.0205128	0	0	0	0	0	0	0	0	0	0	0	0	0	0.0331345	0.0190259	0	0	0	0	0	0	0	0	0	0.026976	0	0	0	0.0433981	0	0	0
Cofactors, Vitamins, Prosthetic Groups, Pigments	Tetrapyrroles	Heme and Siroheme Biosynthesis	Coproporphyrinogen III oxidase, aerobic (EC 1.3.3.3)	0.000976801	0.0122535	0.173984	0.173984	0	0	0	0	0	0	0	0	0	0.0205128	0	0	0	0	0	0	0	0	0	0	0	0	0.0335402	0	0	0	0	0	0	0	0	0	0	0.0742942	0.026976	0	0	0	0	0.171527	0	0
Cofactors, Vitamins, Prosthetic Groups, Pigments	Tetrapyrroles	Coenzyme B12 biosynthesis	Predicted cobalt transporter in Bacteroides_Porphyromonas	0	0.0136258	0.177927	0.177927	0	0	0	0	0	0	0	0	0	0	0	0	0	0	0	0	0	0	0	0	0	0	0	0.0331345	0	0	0	0.208551	0	0	0	0	0	0	0	0	0	0	0	0	0.0989609	0
Cofactors, Vitamins, Prosthetic Groups, Pigments	NAD and NADP	NAD regulation	Nicotinate phosphoribosyltransferase (EC 2.4.2.11) - #1	0.0128267	0.0277299	0.182108	0.182108	0	0	0	0	0	0.0900576	0	0	0.0470367	0.0410256	0.0912409	0	0	0	0	0	0	0	0	0	0	0.0797448	0.0503102	0	0	0.0322061	0	0	0	0	0	0	0	0.0742942	0.053952	0	0.0312695	0	0.0542476	0	0	0.0563222
Cofactors, Vitamins, Prosthetic Groups, Pigments	NAD and NADP	NAD and NADP cofactor biosynthesis global	Nicotinate phosphoribosyltransferase (EC 2.4.2.11)	0.0128267	0.0277299	0.182108	0.182108	0	0	0	0	0	0.0900576	0	0	0.0470367	0.0410256	0.0912409	0	0	0	0	0	0	0	0	0	0	0.0797448	0.0503102	0	0	0.0322061	0	0	0	0	0	0	0	0.0742942	0.053952	0	0.0312695	0	0.0542476	0	0	0.0563222
Cofactors, Vitamins, Prosthetic Groups, Pigments	Folate and pterines	Molybdenum cofactor biosynthesis	Molybdopterin-guanine dinucleotide biosynthesis protein MobB	0.0160747	0.00708313	0.192294	0.192294	0	0.0956938	0	0	0	0.0180115	0.0192049	0.0309502	0	0	0.0304136	0	0.0951475	0	0	0	0	0.0481464	0	0	0	0	0.0167701	0.0331345	0	0	0	0	0	0.0203004	0	0	0	0	0.026976	0	0.0625391	0	0	0	0	0
Cofactors, Vitamins, Prosthetic Groups, Pigments	Cofactors, Vitamins, Prosthetic Groups, Pigments	Thiamin biosynthesis	Hydroxymethylpyrimidine ABC transporter, substrate-binding component	0	0.00241469	0.194188	0.194188	0	0	0	0	0	0	0	0	0	0	0	0	0	0	0	0	0	0	0	0	0	0	0	0	0	0.0322061	0	0	0	0	0	0	0	0	0	0	0	0	0	0	0	0.0281611
Cofactors, Vitamins, Prosthetic Groups, Pigments	Folate and pterines	YgfZ	Iron binding protein IscA for iron-sulfur cluster assembly - #1	0	0.00284745	0.194255	0.194255	0	0	0	0	0	0	0	0	0	0	0	0	0	0	0	0	0	0	0	0	0	0	0	0.0331345	0.0380518	0	0	0	0	0	0	0	0	0	0	0	0	0	0	0	0	0
Cofactors, Vitamins, Prosthetic Groups, Pigments	Folate and pterines	YgfZ	Aminomethyltransferase (glycine cleavage system T protein) (EC 2.1.2.10) - #4	0.00633958	0.0203359	0.194294	0.194294	0	0	0	0	0	0.0540346	0	0.0309502	0	0	0	0	0	0	0	0	0	0.0481464	0	0	0	0.0265816	0	0.0331345	0.0190259	0.0966184	0	0	0	0.0203004	0	0	0	0	0.053952	0.21322	0	0	0.0108495	0	0	0
Cofactors, Vitamins, Prosthetic Groups, Pigments	Folate and pterines	Methanopterin biosynthesis2	Triphosphoribosyl-dephospho-CoA synthetase	0	0.00150634	0.19457	0.19457	0	0	0	0	0	0	0	0	0	0	0	0	0	0	0	0	0	0	0	0	0	0	0	0	0	0	0	0	0	0.0203004	0	0	0	0	0	0	0	0	0	0	0	0
Cofactors, Vitamins, Prosthetic Groups, Pigments	NAD and NADP	NAD regulation	Predicted nicotinate-regulated transporter BH3254	0	0.00238865	0.19597	0.19597	0	0	0	0	0	0	0	0	0	0	0	0	0	0	0	0	0	0	0	0	0	0.0265816	0	0.0331345	0	0	0	0	0	0	0	0	0	0	0	0	0	0	0	0	0	0
Cofactors, Vitamins, Prosthetic Groups, Pigments	Riboflavin, FMN, FAD	Flavodoxin	NAD(P)H oxidoreductase YRKL (EC 1.6.99.-)	0.00229268	0.00778838	0.197141	0.197141	0	0	0	0	0	0	0	0	0	0	0	0	0	0	0	0	0	0.0481464	0	0	0	0	0.0167701	0	0	0	0	0	0	0.0203004	0	0	0	0.0742942	0.026976	0	0	0	0.0108495	0	0	0.0281611
Cofactors, Vitamins, Prosthetic Groups, Pigments	Folate and pterines	YgfZ	Glutamate--cysteine ligase (EC 6.3.2.2), divergent, of Alpha- and Beta-proteobacteria type	0	0.00584949	0.198418	0.198418	0	0	0	0	0	0	0	0	0	0	0	0	0	0	0	0	0	0	0	0	0	0	0	0	0	0	0	0	0	0.0203004	0	0	0	0	0.026976	0	0	0	0	0	0.0989609	0
Cofactors, Vitamins, Prosthetic Groups, Pigments	Folate and pterines	YgfZ	Twin-arginine translocation protein TatA - #1	0.00238834	0.00827458	0.198533	0.198533	0	0	0	0	0	0	0.0192049	0.0309502	0	0	0	0	0	0	0	0	0	0	0	0	0	0	0	0	0	0	0	0	0	0.0203004	0.0819001	0	0	0	0.026976	0	0	0	0.0108495	0	0.0494805	0
Cofactors, Vitamins, Prosthetic Groups, Pigments	Folate and pterines	YgfZ	2-amino-4-hydroxy-6-hydroxymethyldihydropteridine pyrophosphokinase (EC 2.7.6.3) - #4	0.00289213	0.0144	0.199093	0.199093	0	0	0	0	0	0.0180115	0.0192049	0	0.0235183	0	0	0	0	0	0	0	0	0	0	0	0	0.0265816	0.0670803	0	0	0	0	0	0.097371	0	0	0	0	0	0	0	0	0	0	0	0	0.168966
Cofactors, Vitamins, Prosthetic Groups, Pigments	Folate and pterines	Methanopterin biosynthesis2	2-amino-4-hydroxy-6-hydroxymethyldihydropteridine pyrophosphokinase (EC 2.7.6.3) - #2	0.00289213	0.0144	0.199093	0.199093	0	0	0	0	0	0.0180115	0.0192049	0	0.0235183	0	0	0	0	0	0	0	0	0	0	0	0	0.0265816	0.0670803	0	0	0	0	0	0.097371	0	0	0	0	0	0	0	0	0	0	0	0	0.168966
Cofactors, Vitamins, Prosthetic Groups, Pigments	Folate and pterines	Folate Biosynthesis	2-amino-4-hydroxy-6-hydroxymethyldihydropteridine pyrophosphokinase (EC 2.7.6.3) - #1	0.00289213	0.0144	0.199093	0.199093	0	0	0	0	0	0.0180115	0.0192049	0	0.0235183	0	0	0	0	0	0	0	0	0	0	0	0	0.0265816	0.0670803	0	0	0	0	0	0.097371	0	0	0	0	0	0	0	0	0	0	0	0	0.168966
Cofactors, Vitamins, Prosthetic Groups, Pigments	Folate and pterines	Pterin metabolism 3	2-amino-4-hydroxy-6-hydroxymethyldihydropteridine pyrophosphokinase (EC 2.7.6.3) - #3	0.00289213	0.0144	0.199093	0.199093	0	0	0	0	0	0.0180115	0.0192049	0	0.0235183	0	0	0	0	0	0	0	0	0	0	0	0	0.0265816	0.0670803	0	0	0	0	0	0.097371	0	0	0	0	0	0	0	0	0	0	0	0	0.168966
Cofactors, Vitamins, Prosthetic Groups, Pigments	Riboflavin, FMN, FAD	Flavodoxin	Flavodoxin	0.069669	0.0302791	0.201306	0.201306	0	0.0956938	0.0997009	0	0	0.0180115	0.0384098	0.0928505	0.0940734	0.0615385	0.121655	0.662252	0	0	0	0.130719	0	0.0481464	0	0	0	0	0.0503102	0	0.0190259	0	0	0	0	0.101502	0	0	0	0.148588	0.107904	0	0.0938086	0	0.0325486	0	0	0.0281611
Cofactors, Vitamins, Prosthetic Groups, Pigments	Cofactors, Vitamins, Prosthetic Groups, Pigments	Thiamin biosynthesis	Thiamin biosynthesis protein ThiC	0.00523091	0.0132031	0.2025	0.2025	0	0	0	0	0	0	0.0384098	0	0	0.0410256	0.0304136	0	0	0	0	0	0	0	0	0	0	0	0.0167701	0	0	0	0	0	0	0.0203004	0	0	0	0	0.080928	0	0	0	0.0433981	0	0.0494805	0.0844832
Cofactors, Vitamins, Prosthetic Groups, Pigments	Cofactors, Vitamins, Prosthetic Groups, Pigments	Thiamin biosynthesis	Thiamin ABC transporter, transmembrane component	0.00378809	0.0115003	0.202558	0.202558	0	0	0	0	0	0.0180115	0	0	0	0.0615385	0	0	0	0	0	0	0	0	0	0	0	0	0	0	0.0190259	0	0	0	0	0	0	0	0	0.0742942	0	0	0	0	0.0108495	0	0.0494805	0.0281611
Cofactors, Vitamins, Prosthetic Groups, Pigments	Folate and pterines	Folate Biosynthesis	Para-aminobenzoate synthase, aminase component (EC 2.6.1.85) - #2	0.00907043	0.019871	0.202818	0.202818	0	0	0	0	0	0	0.0192049	0.0309502	0.0235183	0.0205128	0	0	0	0	0	0	0	0.0962927	0	0	0	0.0531632	0.0670803	0	0.0761035	0	0	0	0	0	0.0819001	0.110375	0	0	0.026976	0	0.0312695	0	0.0325486	0	0	0
Cofactors, Vitamins, Prosthetic Groups, Pigments	Folate and pterines	Molybdenum cofactor biosynthesis	Molybdenum cofactor biosynthesis protein MoaC	0.0109398	0.00363955	0.204218	0.204218	0	0	0	0	0	0.0540346	0.0192049	0	0.0235183	0.102564	0.0304136	0	0	0	0	0	0	0	0	0	0	0.0531632	0	0	0	0	0	0	0	0	0	0	0	0	0.026976	0	0	0	0.0108495	0	0	0
Cofactors, Vitamins, Prosthetic Groups, Pigments	Folate and pterines	YgfZ	Formate dehydrogenase-O, major subunit (EC 1.2.1.2)	0.00540504	0.0147964	0.207517	0.207517	0	0	0	0	0	0	0	0	0	0	0	0	0	0	0	0.0653595	0	0.0481464	0	0	0	0	0.0335402	0	0.0190259	0	0	0	0	0.101502	0	0.0551876	0	0	0.026976	0	0	0	0	0	0.0989609	0
Cofactors, Vitamins, Prosthetic Groups, Pigments	Tetrapyrroles	Heme and Siroheme Biosynthesis	Protoporphyrinogen IX oxidase, novel form, HemJ (EC 1.3.-.-)	0.000857692	0.0168985	0.209365	0.209365	0	0	0	0	0	0.0180115	0	0	0	0	0	0	0	0	0	0	0	0	0	0	0	0	0	0	0	0	0.101215	0	0	0.0203004	0	0	0	0	0.026976	0	0	0.273973	0	0	0	0
Cofactors, Vitamins, Prosthetic Groups, Pigments	Cofactors, Vitamins, Prosthetic Groups, Pigments	Thiamin biosynthesis	Substrate-specific component YkoE of thiamin-regulated ECF transporter for HydroxyMethylPyrimidine	0.00309753	0.0119921	0.20955	0.20955	0	0	0	0	0	0.0180115	0	0	0.0470367	0	0	0	0	0	0	0	0	0	0	0	0	0	0.0167701	0.0331345	0	0.0322061	0	0	0	0	0	0.0551876	0	0	0	0	0	0	0.021699	0	0	0.140805
Cofactors, Vitamins, Prosthetic Groups, Pigments	Folate and pterines	YgfZ	L-aspartate oxidase (EC 1.4.3.16)	0.00569119	0.0156196	0.213177	0.213177	0	0	0	0	0	0	0.0576147	0.0619003	0	0	0	0	0	0	0	0	0	0	0	0	0	0	0	0	0.0951294	0	0.101215	0	0	0.0406009	0	0	0	0	0	0	0	0	0.0325486	0	0	0
Cofactors, Vitamins, Prosthetic Groups, Pigments	Folate and pterines	5-FCL-like protein	Phosphomethylpyrimidine kinase (EC 2.7.4.7) - #1	1.87901	0.0397594	0.214658	0.214658	5.88235	0	0	0	33.3333	0.0540346	0.0192049	0.0928505	0.0470367	0	0.0304136	0	0	0	0	0	0	0	0	0	0	0.0531632	0.10062	0.0662691	0	0.0966184	0	0.104275	0	0.0203004	0	0	0	0	0	0	0	0.273973	0.0325486	0	0.0494805	0.0563222
Cofactors, Vitamins, Prosthetic Groups, Pigments	Cofactors, Vitamins, Prosthetic Groups, Pigments	Thiamin biosynthesis	Phosphomethylpyrimidine kinase (EC 2.7.4.7)	1.87901	0.0397594	0.214658	0.214658	5.88235	0	0	0	33.3333	0.0540346	0.0192049	0.0928505	0.0470367	0	0.0304136	0	0	0	0	0	0	0	0	0	0	0.0531632	0.10062	0.0662691	0	0.0966184	0	0.104275	0	0.0203004	0	0	0	0	0	0	0	0.273973	0.0325486	0	0.0494805	0.0563222
Cofactors, Vitamins, Prosthetic Groups, Pigments	Cofactors, Vitamins, Prosthetic Groups, Pigments	Thiamin biosynthesis	Thiamin ABC transporter, ATPase component	0	0.00195905	0.215896	0.215896	0	0	0	0	0	0	0	0	0	0	0	0	0	0	0	0	0	0	0	0	0	0	0.0167701	0	0	0.0322061	0	0	0	0	0	0	0	0	0	0	0	0	0	0	0	0
Cofactors, Vitamins, Prosthetic Groups, Pigments	Folate and pterines	YgfZ	Gamma-glutamyl phosphate reductase (EC 1.2.1.41) - #1	0.0616436	0.0102349	0.216395	0.216395	0	0.0956938	0.0997009	0	0	0	0.0192049	0.0309502	0.0235183	0.0820513	0	0	0	0	0	0	0	0	0	0	0.943396	0.0265816	0.0167701	0.0331345	0.0190259	0	0	0	0	0.0406009	0	0	0	0	0	0	0.0312695	0	0.0108495	0	0.0494805	0.0281611
Cofactors, Vitamins, Prosthetic Groups, Pigments	Folate and pterines	Molybdenum cofactor biosynthesis	Molybdenum transport system permease protein ModB (TC 3.A.1.8.1)	0.00171538	0.0172572	0.217769	0.217769	0	0	0	0	0	0.0360231	0	0	0	0	0	0	0	0	0	0	0	0	0	0	0	0.0265816	0.0167701	0	0	0.0322061	0	0	0	0	0.0819001	0	0	0	0	0	0	0.273973	0	0	0	0
Cofactors, Vitamins, Prosthetic Groups, Pigments	Tetrapyrroles	Coenzyme B12 biosynthesis	Precorrin-6A synthase (EC 2.1.1.152)	0	0.00393901	0.22036	0.22036	0	0	0	0	0	0	0	0	0	0	0	0	0	0	0	0	0	0	0	0	0	0	0	0.0662691	0	0.0322061	0	0	0	0	0	0	0	0	0	0	0	0	0	0	0	0
Cofactors, Vitamins, Prosthetic Groups, Pigments	Folate and pterines	YgfZ	Coenzyme PQQ synthesis protein E	0.00311236	0.0106255	0.221834	0.221834	0	0	0	0	0	0	0	0	0	0	0	0	0	0	0	0.0653595	0	0	0	0	0	0	0	0	0	0	0	0	0	0.0406009	0	0.110375	0	0	0.026976	0	0.0312695	0	0.021699	0	0	0
Cofactors, Vitamins, Prosthetic Groups, Pigments	Folate and pterines	YgfZ-Iron	Ferric uptake regulation protein FUR - #2	0.00994575	0.0037804	0.2244	0.2244	0	0	0.0997009	0	0	0.0360231	0.0192049	0	0.0235183	0	0.0304136	0	0	0	0	0	0	0	0	0	0	0	0	0	0.0190259	0	0	0	0	0.0203004	0	0	0	0	0.026976	0	0	0	0.0108495	0	0	0
Cofactors, Vitamins, Prosthetic Groups, Pigments	Folate and pterines	YgfZ	Ferric uptake regulation protein FUR - #1	0.00994575	0.0037804	0.2244	0.2244	0	0	0.0997009	0	0	0.0360231	0.0192049	0	0.0235183	0	0.0304136	0	0	0	0	0	0	0	0	0	0	0	0	0	0.0190259	0	0	0	0	0.0203004	0	0	0	0	0.026976	0	0	0	0.0108495	0	0	0
Cofactors, Vitamins, Prosthetic Groups, Pigments	Cofactors, Vitamins, Prosthetic Groups, Pigments	Thiamin biosynthesis	ATPase component YkoD of energizing module of thiamin-regulated ECF transporter for HydroxyMethylPyrimidine	0.0107673	0.0279595	0.226405	0.226405	0	0	0.0997009	0	0	0.0180115	0	0.0309502	0.0470367	0	0.0304136	0	0	0	0	0	0	0	0	0	0	0.0265816	0.0335402	0	0	0.0644122	0	0	0	0	0.0819001	0	0	0	0	0	0.0625391	0.273973	0.0433981	0	0	0.112644
Cofactors, Vitamins, Prosthetic Groups, Pigments	Folate and pterines	YgfZ	Phosphoribosylformylglycinamidine cyclo-ligase (EC 6.3.3.1)	0.0211497	0.040083	0.228145	0.228145	0	0.0956938	0	0	0	0.0360231	0.0192049	0.0619003	0	0.0410256	0	0	0.190295	0	0	0	0	0	0	0	0	0.0531632	0.0335402	0.0662691	0.0951294	0.0966184	0.202429	0.104275	0	0.0203004	0	0	0	0.0742942	0	0	0	0	0.0108495	0.171527	0	0.0563222
Cofactors, Vitamins, Prosthetic Groups, Pigments	Quinone cofactors	Menaquinone and Phylloquinone Biosynthesis	Naphthoate synthase (EC 4.1.3.36)	0.00294764	0.00948437	0.231317	0.231317	0	0	0	0	0	0	0	0.0619003	0	0	0	0	0	0	0	0	0	0	0	0	0	0.0797448	0.0167701	0.0662691	0	0.0322061	0	0	0	0	0	0	0	0	0	0	0.0312695	0	0.0108495	0	0	0
Cofactors, Vitamins, Prosthetic Groups, Pigments	Quinone cofactors	Ubiquinone Biosynthesis	2-octaprenyl-3-methyl-6-methoxy-1,4-benzoquinol hydroxylase (EC 1.14.13.-) - #1	0.00386216	0.00983298	0.233891	0.233891	0	0	0	0	0	0	0.0192049	0.0619003	0	0	0	0	0	0	0	0	0	0	0	0	0	0	0	0	0.0570776	0.0322061	0	0	0	0.0406009	0	0	0	0	0.026976	0	0	0	0.0542476	0	0	0
Cofactors, Vitamins, Prosthetic Groups, Pigments	Cofactors, Vitamins, Prosthetic Groups, Pigments	Thiamin biosynthesis	Hydroxymethylpyrimidine ABC transporter, ATPase component	0.000976801	0.0266283	0.239975	0.239975	0	0	0	0	0	0	0	0	0	0.0205128	0	0	0	0	0	0	0	0	0	0	0	0	0	0	0	0	0	0	0	0	0	0	0.452489	0	0	0.21322	0	0	0	0	0	0
Cofactors, Vitamins, Prosthetic Groups, Pigments	NAD and NADP	NAD regulation	Nicotinamide-nucleotide adenylyltransferase, NadM family (EC 2.7.7.1) - #1	0.00687805	0.0217269	0.240994	0.240994	0	0	0	0	0	0	0	0	0	0	0	0	0	0	0	0	0	0.144439	0	0	0	0	0.0838504	0	0	0	0	0	0	0.0203004	0.0819001	0.0551876	0	0.222883	0.026976	0	0	0	0	0	0	0
Cofactors, Vitamins, Prosthetic Groups, Pigments	NAD and NADP	NAD and NADP cofactor biosynthesis global	Nicotinamide-nucleotide adenylyltransferase, NadM family (EC 2.7.7.1)	0.00687805	0.0217269	0.240994	0.240994	0	0	0	0	0	0	0	0	0	0	0	0	0	0	0	0	0	0.144439	0	0	0	0	0.0838504	0	0	0	0	0	0	0.0203004	0.0819001	0.0551876	0	0.222883	0.026976	0	0	0	0	0	0	0
Cofactors, Vitamins, Prosthetic Groups, Pigments	Folate and pterines	Methanopterin biosynthesis2	Queuosine biosynthesis QueD, PTPS-I	0.00233151	0.000433981	0.241213	0.241213	0	0	0	0	0	0.0180115	0	0.0309502	0	0	0	0	0	0	0	0	0	0	0	0	0	0	0	0	0	0	0	0	0	0	0	0	0	0	0	0	0	0	0.0108495	0	0	0
Cofactors, Vitamins, Prosthetic Groups, Pigments	NAD and NADP	NAD regulation	Nicotinate-nucleotide adenylyltransferase (EC 2.7.7.18) - #1	0.00647483	0.0141103	0.242571	0.242571	0	0	0	0	0	0.0360231	0.0384098	0	0	0.0615385	0	0	0	0	0	0	0	0	0	0	0	0.0531632	0.0167701	0	0.0190259	0.0644122	0	0	0	0.0203004	0	0	0	0	0	0	0.0625391	0	0.0108495	0	0	0
Cofactors, Vitamins, Prosthetic Groups, Pigments	NAD and NADP	NAD and NADP cofactor biosynthesis global	Nicotinate-nucleotide adenylyltransferase (EC 2.7.7.18)	0.00647483	0.0141103	0.242571	0.242571	0	0	0	0	0	0.0360231	0.0384098	0	0	0.0615385	0	0	0	0	0	0	0	0	0	0	0	0.0531632	0.0167701	0	0.0190259	0.0644122	0	0	0	0.0203004	0	0	0	0	0	0	0.0625391	0	0.0108495	0	0	0
Cofactors, Vitamins, Prosthetic Groups, Pigments	Folate and pterines	YgfZ	Chorismate synthase (EC 4.2.3.5) - #2	0.0146505	0.0317473	0.245729	0.245729	0	0	0	0	0	0.0540346	0.0384098	0.0928505	0	0.0615385	0.0608273	0	0	0	0	0	0	0	0	0	0	0.0265816	0.0167701	0.0662691	0.0570776	0.0644122	0	0.104275	0.292113	0.0203004	0	0	0	0	0.026976	0	0.0625391	0	0.0108495	0	0	0.0281611
Cofactors, Vitamins, Prosthetic Groups, Pigments	Folate and pterines	Pterin metabolism 3	Phenylalanine-4-hydroxylase (EC 1.14.16.1) - #4	0	0.00182263	0.252328	0.252328	0	0	0	0	0	0	0	0	0	0	0	0	0	0	0	0	0	0	0	0	0	0	0	0	0	0	0	0	0	0	0	0	0	0	0	0	0	0	0.0108495	0	0	0
Cofactors, Vitamins, Prosthetic Groups, Pigments	Folate and pterines	Pterin biosynthesis	Phenylalanine-4-hydroxylase (EC 1.14.16.1) - #1	0	0.00182263	0.252328	0.252328	0	0	0	0	0	0	0	0	0	0	0	0	0	0	0	0	0	0	0	0	0	0	0	0	0	0	0	0	0	0	0	0	0	0	0	0	0	0	0.0108495	0	0	0
Cofactors, Vitamins, Prosthetic Groups, Pigments	Folate and pterines	Pterin carbinolamine dehydratase	Phenylalanine-4-hydroxylase (EC 1.14.16.1) - #2	0	0.00182263	0.252328	0.252328	0	0	0	0	0	0	0	0	0	0	0	0	0	0	0	0	0	0	0	0	0	0	0	0	0	0	0	0	0	0	0	0	0	0	0	0	0	0	0.0108495	0	0	0
Cofactors, Vitamins, Prosthetic Groups, Pigments	Folate and pterines	Pterin metabolism	Phenylalanine-4-hydroxylase (EC 1.14.16.1) - #3	0	0.00182263	0.252328	0.252328	0	0	0	0	0	0	0	0	0	0	0	0	0	0	0	0	0	0	0	0	0	0	0	0	0	0	0	0	0	0	0	0	0	0	0	0	0	0	0.0108495	0	0	0
Cofactors, Vitamins, Prosthetic Groups, Pigments	Quinone cofactors	Ubiquinone Biosynthesis	2-octaprenyl-6-methoxyphenol hydroxylase (EC 1.14.13.-) - #1	0.00294764	0.0142217	0.259748	0.259748	0	0	0	0	0	0	0	0.0619003	0	0	0	0	0	0	0	0	0	0	0	0	0	0	0	0	0	0	0	0	0	0.0203004	0	0	0	0	0.026976	0.21322	0	0	0.0108495	0	0.0494805	0
Cofactors, Vitamins, Prosthetic Groups, Pigments	Folate and pterines	YgfZ	Lipoate synthase	0.0046943	0.0141993	0.266271	0.266271	0	0	0	0	0	0.0180115	0.0192049	0.0309502	0	0	0.0304136	0	0	0	0	0	0	0	0	0	0	0.0531632	0.0335402	0	0	0	0	0	0	0	0	0	0	0	0	0	0.0312695	0	0.0108495	0	0.0494805	0
Cofactors, Vitamins, Prosthetic Groups, Pigments	Biotin	Biotin biosynthesis	Biotin synthesis protein bioC	0.044664	0	0.269263	0.269263	0	0	0	0	0	0	0	0	0	0.0205128	0	0	0	0.917431	0	0	0	0	0	0	0	0	0	0	0	0	0	0	0	0	0	0	0	0	0	0	0	0	0	0	0	0
Cofactors, Vitamins, Prosthetic Groups, Pigments	Tetrapyrroles	Heme and Siroheme Biosynthesis	Porphobilinogen deaminase (EC 2.5.1.61)	0.026536	0.0115445	0.274708	0.274708	0	0	0	0	0	0.0180115	0.0384098	0	0.0235183	0.0410256	0.0304136	0	0	0	0	0.261438	0	0.144439	0	0	0	0.0797448	0.0670803	0	0.0190259	0	0	0	0	0.0406009	0	0	0	0	0.053952	0	0	0	0.0108495	0	0	0
Cofactors, Vitamins, Prosthetic Groups, Pigments	Biotin	Biotin biosynthesis	Biotin synthesis protein bioH	0.00147382	0	0.280143	0.280143	0	0	0	0	0	0	0	0.0309502	0	0	0	0	0	0	0	0	0	0	0	0	0	0	0	0	0	0	0	0	0	0	0	0	0	0	0	0	0	0	0	0	0	0
Cofactors, Vitamins, Prosthetic Groups, Pigments	Folate and pterines	Molybdenum cofactor biosynthesis	Molybdenum transport system protein ModD	0.0873744	0	0.280143	0.280143	0	0	0	0	0	0	0	0	0	0	0	0	0	1.83486	0	0	0	0	0	0	0	0	0	0	0	0	0	0	0	0	0	0	0	0	0	0	0	0	0	0	0	0
Cofactors, Vitamins, Prosthetic Groups, Pigments	Quinone cofactors	Ubiquinone Biosynthesis	Chorismate--pyruvate lyase (EC 4.1.3.40)	0.00091452	0	0.280143	0.280143	0	0	0	0	0	0	0.0192049	0	0	0	0	0	0	0	0	0	0	0	0	0	0	0	0	0	0	0	0	0	0	0	0	0	0	0	0	0	0	0	0	0	0	0
Cofactors, Vitamins, Prosthetic Groups, Pigments	Folate and pterines	YgfZ	YgfY COG2938	0.00144827	0	0.280143	0.280143	0	0	0	0	0	0	0	0	0	0	0.0304136	0	0	0	0	0	0	0	0	0	0	0	0	0	0	0	0	0	0	0	0	0	0	0	0	0	0	0	0	0	0	0
Cofactors, Vitamins, Prosthetic Groups, Pigments	Pyridoxine	Pyridoxin (Vitamin B6) Biosynthesis	D-erythrose-4-phosphate dehydrogenase (EC 1.2.1.72)	0.00171538	0	0.280143	0.280143	0	0	0	0	0	0.0360231	0	0	0	0	0	0	0	0	0	0	0	0	0	0	0	0	0	0	0	0	0	0	0	0	0	0	0	0	0	0	0	0	0	0	0	0
Cofactors, Vitamins, Prosthetic Groups, Pigments	NAD and NADP	NAD and NADP cofactor biosynthesis global	NMN phosphatase (EC 3.1.3.5)	0.000857692	0	0.280143	0.280143	0	0	0	0	0	0.0180115	0	0	0	0	0	0	0	0	0	0	0	0	0	0	0	0	0	0	0	0	0	0	0	0	0	0	0	0	0	0	0	0	0	0	0	0
Cofactors, Vitamins, Prosthetic Groups, Pigments	Folate and pterines	YgfZ	FIG001341: Probable Fe(2+)-trafficking protein YggX	0.00453083	0	0.280143	0.280143	0	0	0	0	0	0	0	0	0	0	0	0	0.0951475	0	0	0	0	0	0	0	0	0	0	0	0	0	0	0	0	0	0	0	0	0	0	0	0	0	0	0	0	0
Cofactors, Vitamins, Prosthetic Groups, Pigments	Folate and pterines	YgfZ	Glutathione synthetase (EC 6.3.2.3) - #2	0.000857692	0	0.280143	0.280143	0	0	0	0	0	0.0180115	0	0	0	0	0	0	0	0	0	0	0	0	0	0	0	0	0	0	0	0	0	0	0	0	0	0	0	0	0	0	0	0	0	0	0	0
Cofactors, Vitamins, Prosthetic Groups, Pigments	Folate and pterines	p-Aminobenzoyl-Glutamate Utilization	Catalyzes the cleavage of p-aminobenzoyl-glutamate to p-aminobenzoate and glutamate, subunit A	0.00257308	0	0.280143	0.280143	0	0	0	0	0	0.0540346	0	0	0	0	0	0	0	0	0	0	0	0	0	0	0	0	0	0	0	0	0	0	0	0	0	0	0	0	0	0	0	0	0	0	0	0
Cofactors, Vitamins, Prosthetic Groups, Pigments	NAD and NADP	NAD and NADP cofactor biosynthesis global	N-Ribosylnicotinamide phosphorylase (EC 2.4.2.1)	0.00144827	0	0.280143	0.280143	0	0	0	0	0	0	0	0	0	0	0.0304136	0	0	0	0	0	0	0	0	0	0	0	0	0	0	0	0	0	0	0	0	0	0	0	0	0	0	0	0	0	0	0
Cofactors, Vitamins, Prosthetic Groups, Pigments	Quinone cofactors	Menaquinone Biosynthesis via Futalosine -- gjo	Menaquinone via futalosine step 1	0.000857692	0	0.280143	0.280143	0	0	0	0	0	0.0180115	0	0	0	0	0	0	0	0	0	0	0	0	0	0	0	0	0	0	0	0	0	0	0	0	0	0	0	0	0	0	0	0	0	0	0	0
Cofactors, Vitamins, Prosthetic Groups, Pigments	Folate and pterines	YgfZ	Glutamate synthase [NADPH] small chain (EC 1.4.1.13) - #1	0.0174835	0.0303717	0.286719	0.286719	0	0	0	0	0	0.0180115	0.0192049	0.0619003	0	0.0410256	0	0	0	0	0	0.130719	0	0.0962927	0	0	0	0.0265816	0.0670803	0.0662691	0.0570776	0.0322061	0	0	0.097371	0	0	0	0	0	0	0	0.0312695	0	0.0108495	0.171527	0	0
Cofactors, Vitamins, Prosthetic Groups, Pigments	Pyridoxine	Pyridoxin (Vitamin B6) Biosynthesis	4-hydroxythreonine-4-phosphate dehydrogenase (EC 1.1.1.262) - #1	0.0445449	0.00182077	0.290667	0.290667	0	0	0	0	0	0.0180115	0	0	0	0	0	0	0	0.917431	0	0	0	0	0	0	0	0	0	0	0	0	0	0	0	0	0	0	0	0	0	0	0	0	0	0	0	0.0281611
Cofactors, Vitamins, Prosthetic Groups, Pigments	NAD and NADP	NAD and NADP cofactor biosynthesis global	Kynurenine formamidase, bacterial (EC 3.5.1.9) - #2	0	0.00798937	0.292552	0.292552	0	0	0	0	0	0	0	0	0	0	0	0	0	0	0	0	0	0	0	0	0	0	0	0	0	0	0	0	0	0	0	0	0	0	0	0	0	0	0.0108495	0.171527	0	0
Cofactors, Vitamins, Prosthetic Groups, Pigments	Folate and pterines	p-Aminobenzoyl-Glutamate Utilization	Aminobenzoyl-glutamate transport protein	0.00177221	0.0123182	0.297324	0.297324	0	0	0	0	0	0.0180115	0.0192049	0	0	0	0	0	0	0	0	0	0	0	0	0	0	0	0	0.0994036	0	0	0	0.208551	0	0	0	0	0	0	0	0	0	0	0	0	0	0
Cofactors, Vitamins, Prosthetic Groups, Pigments	Folate and pterines	YgfZ	Coproporphyrinogen III oxidase, oxygen-independent (EC 1.3.99.22)	0.0161954	0.00638723	0.301625	0.301625	0	0	0	0	0	0.0540346	0	0	0	0	0.0304136	0	0.190295	0	0	0.0653595	0	0	0	0	0	0	0	0	0	0	0	0	0	0.0203004	0	0	0	0	0.026976	0	0	0	0.0108495	0	0.0494805	0
Cofactors, Vitamins, Prosthetic Groups, Pigments	Quinone cofactors	Menaquinone and Phylloquinone Biosynthesis	O-succinylbenzoate-CoA synthase (EC 4.2.1.-)	0.00705325	0.0186507	0.304454	0.304454	0	0	0	0	0	0	0.0192049	0.0309502	0.0470367	0.0205128	0.0304136	0	0	0	0	0	0	0	0	0	0	0	0.0335402	0.0662691	0	0	0	0	0	0	0	0	0	0	0	0.21322	0.125078	0	0	0	0	0.0281611
Cofactors, Vitamins, Prosthetic Groups, Pigments	Folate and pterines	5-FCL-like protein	Pyruvate dehydrogenase E1 component (EC 1.2.4.1) - #3	0.0569306	0.102417	0.332309	0.332309	0	0	0	0	0	0.0180115	0	0	0	0.0205128	0	0	0.0951475	0.917431	0	0	0	0.144439	0	0	0	0.15949	0.0670803	0.36448	0.171233	0.193237	0.202429	0.104275	0.389484	0.0812018	0.0819001	0	0	0.0742942	0.161856	0	0	0	0.0433981	0	0.0989609	0
Cofactors, Vitamins, Prosthetic Groups, Pigments	Folate and pterines	Pterin carbinolamine dehydratase	Aromatic-amino-acid aminotransferase (EC 2.6.1.57)	0.0114634	0.0277615	0.335415	0.335415	0	0	0	0	0	0	0	0	0	0	0	0	0	0	0	0	0	0.240732	0	0	0	0	0	0	0.0380518	0	0	0	0	0.0203004	0	0.165563	0	0	0.161856	0.21322	0	0	0.0108495	0	0.0494805	0
Cofactors, Vitamins, Prosthetic Groups, Pigments	Folate and pterines	Pterin metabolism 3	Aromatic-amino-acid aminotransferase (EC 2.6.1.57) - #1	0.0114634	0.0277615	0.335415	0.335415	0	0	0	0	0	0	0	0	0	0	0	0	0	0	0	0	0	0.240732	0	0	0	0	0	0	0.0380518	0	0	0	0	0.0203004	0	0.165563	0	0	0.161856	0.21322	0	0	0.0108495	0	0.0494805	0
Cofactors, Vitamins, Prosthetic Groups, Pigments	Folate and pterines	YgfZ	5,10-methylenetetrahydrofolate reductase (EC 1.5.1.20) - #4	0.0107696	0.00572411	0.342107	0.342107	0	0	0	0	0	0.0180115	0.0576147	0.0309502	0	0.0410256	0.0304136	0	0	0	0	0	0	0.0481464	0	0	0	0	0	0	0	0	0	0	0	0.0406009	0	0	0	0.0742942	0	0	0	0	0.0108495	0	0	0
Cofactors, Vitamins, Prosthetic Groups, Pigments	Folate and pterines	5-FCL-like protein	5,10-methylenetetrahydrofolate reductase (EC 1.5.1.20) - #3	0.0107696	0.00572411	0.342107	0.342107	0	0	0	0	0	0.0180115	0.0576147	0.0309502	0	0.0410256	0.0304136	0	0	0	0	0	0	0.0481464	0	0	0	0	0	0	0	0	0	0	0	0.0406009	0	0	0	0.0742942	0	0	0	0	0.0108495	0	0	0
Cofactors, Vitamins, Prosthetic Groups, Pigments	Folate and pterines	Pterin biosynthesis	4-amino-4-deoxy-L-arabinose transferase and related glycosyltransferases of PMT family	0.00458537	0.0104477	0.345048	0.345048	0	0	0	0	0	0	0	0	0	0	0	0	0	0	0	0	0	0.0962927	0	0	0	0	0.0503102	0	0.0190259	0	0	0	0	0.0406009	0	0	0	0	0.080928	0	0.0312695	0	0.021699	0	0	0
Cofactors, Vitamins, Prosthetic Groups, Pigments	Folate and pterines	YgfZ-Iron	Cytochrome c heme lyase subunit CcmF	0.00859269	0.0158335	0.3456	0.3456	0	0	0	0	0	0.0720461	0	0.0309502	0.0470367	0	0.0304136	0	0	0	0	0	0	0	0	0	0	0.0797448	0.0167701	0	0.0190259	0.0644122	0	0	0	0	0	0	0	0	0	0	0	0	0	0	0.0494805	0
Cofactors, Vitamins, Prosthetic Groups, Pigments	Folate and pterines	YgfZ	Dihydroorotate dehydrogenase electron transfer subunit (EC 1.3.3.1)	0.00737757	0.0208792	0.351565	0.351565	0	0	0.0997009	0	0	0.0360231	0.0192049	0	0	0	0	0	0	0	0	0	0	0	0	0	0	0.0265816	0	0.0331345	0	0	0.303644	0	0	0	0	0	0	0	0	0	0.0312695	0	0.0108495	0	0	0.0281611
Cofactors, Vitamins, Prosthetic Groups, Pigments	Folate and pterines	YgfZ	Dihydroorotate dehydrogenase, catalytic subunit (EC 1.3.3.1)	0.0148415	0.0262538	0.352682	0.352682	0	0	0.0997009	0	0	0.0180115	0.0576147	0.0619003	0.0235183	0.0205128	0.0304136	0	0	0	0	0	0	0	0	0	0	0.106326	0.0335402	0	0	0.0644122	0.202429	0	0.097371	0	0	0	0	0	0	0	0.0312695	0	0	0	0	0
Cofactors, Vitamins, Prosthetic Groups, Pigments	Folate and pterines	Molybdenum cofactor biosynthesis	Molybdopterin biosynthesis protein MoeA	0.014822	0.0236474	0.359716	0.359716	0	0	0	0	0	0.0900576	0.0192049	0.0619003	0	0.0615385	0.0304136	0	0	0	0	0	0	0.0481464	0	0	0	0.0797448	0.0167701	0.0331345	0.0190259	0.0966184	0	0	0	0.0203004	0	0	0	0	0.026976	0	0.125078	0	0.0433981	0	0	0
Cofactors, Vitamins, Prosthetic Groups, Pigments	Folate and pterines	YgfZ-Iron	TonB-dependent receptor; Outer membrane receptor for ferrienterochelin and colicins	0.000976801	0.00431337	0.36169	0.36169	0	0	0	0	0	0	0	0	0	0.0205128	0	0	0	0	0	0	0	0	0	0	0	0	0.0335402	0	0	0	0	0	0	0	0	0	0	0.0742942	0	0	0	0	0	0	0	0
Cofactors, Vitamins, Prosthetic Groups, Pigments	Folate and pterines	YgfZ	Aspartate carbamoyltransferase (EC 2.1.3.2) - #1	0.0122364	0.0210601	0.363306	0.363306	0	0	0	0	0	0.0180115	0.0384098	0.0309502	0.0235183	0.0205128	0.0304136	0	0.0951475	0	0	0	0	0	0	0	0	0.0265816	0.0335402	0.0662691	0	0.0644122	0	0	0	0	0	0	0	0	0	0	0.0625391	0	0.0325486	0	0	0.0844832
Cofactors, Vitamins, Prosthetic Groups, Pigments	Quinone cofactors	Ubiquinone Biosynthesis	Ubiquinone biosynthesis monooxygenase UbiB	0.00587593	0.0123667	0.364377	0.364377	0	0	0	0	0	0.0540346	0.0384098	0.0309502	0	0	0	0	0	0	0	0	0	0	0	0	0	0	0.0167701	0	0.0190259	0.0322061	0	0	0.097371	0.0203004	0	0	0	0	0	0	0	0	0.0108495	0	0	0.112644
Cofactors, Vitamins, Prosthetic Groups, Pigments	Tetrapyrroles	Chlorophyll Biosynthesis	Protoporphyrin IX Mg-chelatase subunit H (EC 6.6.1.1)	0	0.00112644	0.365255	0.365255	0	0	0	0	0	0	0	0	0	0	0	0	0	0	0	0	0	0	0	0	0	0	0	0	0	0	0	0	0	0	0	0	0	0	0	0	0	0	0	0	0	0.0281611
Cofactors, Vitamins, Prosthetic Groups, Pigments	Quinone cofactors	Menaquinone Biosynthesis via Futalosine -- gjo	Gene SCO4494, often clustered with other genes in menaquinone via futalosine pathway	0	0.00312256	0.365255	0.365255	0	0	0	0	0	0	0	0	0	0	0	0	0	0	0	0	0	0	0	0	0	0	0	0	0	0	0	0	0	0	0	0	0	0	0	0	0	0	0	0	0	0
Cofactors, Vitamins, Prosthetic Groups, Pigments	Cofactors, Vitamins, Prosthetic Groups, Pigments	Thiamin biosynthesis	Predicted hydroxymethylpyrimidine transporter CytX	0	0.0109589	0.365255	0.365255	0	0	0	0	0	0	0	0	0	0	0	0	0	0	0	0	0	0	0	0	0	0	0	0	0	0	0	0	0	0	0	0	0	0	0	0	0	0.273973	0	0	0	0
Cofactors, Vitamins, Prosthetic Groups, Pigments	Tetrapyrroles	Heme and Siroheme Biosynthesis	Hypothetical radical SAM family enzyme, NOT coproporphyrinogen III oxidase, oxygen-independent	0	0.000433981	0.365255	0.365255	0	0	0	0	0	0	0	0	0	0	0	0	0	0	0	0	0	0	0	0	0	0	0	0	0	0	0	0	0	0	0	0	0	0	0	0	0	0	0.0108495	0	0	0
Cofactors, Vitamins, Prosthetic Groups, Pigments	Tetrapyrroles	Chlorophyll Biosynthesis	Mg-protoporphyrin IX monomethyl ester oxidative cyclase (anaerobic) (EC 1.14.13.81)	0	0.000670803	0.365255	0.365255	0	0	0	0	0	0	0	0	0	0	0	0	0	0	0	0	0	0	0	0	0	0	0.0167701	0	0	0	0	0	0	0	0	0	0	0	0	0	0	0	0	0	0	0
Cofactors, Vitamins, Prosthetic Groups, Pigments	Tetrapyrroles	Coenzyme B12 biosynthesis	ATPase component CbiO of energizing module of cobalt ECF transporter	0	0.000670803	0.365255	0.365255	0	0	0	0	0	0	0	0	0	0	0	0	0	0	0	0	0	0	0	0	0	0	0.0167701	0	0	0	0	0	0	0	0	0	0	0	0	0	0	0	0	0	0	0
Cofactors, Vitamins, Prosthetic Groups, Pigments	Riboflavin, FMN, FAD	Flavodoxin	Hypothetical flavoprotein YqcA (clustered with tRNA pseudouridine synthase C)	0	0.000694324	0.365255	0.365255	0	0	0	0	0	0	0	0	0	0	0	0	0	0	0	0	0	0	0	0	0	0	0	0	0	0	0	0	0	0	0	0	0	0	0	0	0	0	0	0	0	0
Cofactors, Vitamins, Prosthetic Groups, Pigments	Quinone cofactors	Pyrroloquinoline Quinone biosynthesis	Coenzyme PQQ synthesis protein D - #1	0	0.000812018	0.365255	0.365255	0	0	0	0	0	0	0	0	0	0	0	0	0	0	0	0	0	0	0	0	0	0	0	0	0	0	0	0	0	0.0203004	0	0	0	0	0	0	0	0	0	0	0	0
Cofactors, Vitamins, Prosthetic Groups, Pigments	Biotin	Biotin biosynthesis	predicted biotin regulatory protein BioR (GntR family)	0	0.00132538	0.365255	0.365255	0	0	0	0	0	0	0	0	0	0	0	0	0	0	0	0	0	0	0	0	0	0	0	0.0331345	0	0	0	0	0	0	0	0	0	0	0	0	0	0	0	0	0	0
Cofactors, Vitamins, Prosthetic Groups, Pigments	Quinone cofactors	Pyrroloquinoline Quinone biosynthesis	Coenzyme PQQ synthesis protein A - #1	0	0.000812018	0.365255	0.365255	0	0	0	0	0	0	0	0	0	0	0	0	0	0	0	0	0	0	0	0	0	0	0	0	0	0	0	0	0	0.0203004	0	0	0	0	0	0	0	0	0	0	0	0
Cofactors, Vitamins, Prosthetic Groups, Pigments	Cofactors, Vitamins, Prosthetic Groups, Pigments	Thiamin biosynthesis	Thiazole biosynthetic enzyme Thi4	0	0.00834202	0.365255	0.365255	0	0	0	0	0	0	0	0	0	0	0	0	0	0	0	0	0	0	0	0	0	0	0	0	0	0	0	0.208551	0	0	0	0	0	0	0	0	0	0	0	0	0	0
Cofactors, Vitamins, Prosthetic Groups, Pigments	Folate and pterines	YgfZ	Glutamate--cysteine ligase eukaryotic (EC 6.3.2.2)	0	0.000670803	0.365255	0.365255	0	0	0	0	0	0	0	0	0	0	0	0	0	0	0	0	0	0	0	0	0	0	0.0167701	0	0	0	0	0	0	0	0	0	0	0	0	0	0	0	0	0	0	0
Cofactors, Vitamins, Prosthetic Groups, Pigments	Quinone cofactors	Coenzyme PQQ synthesis	Coenzyme PQQ synthesis protein A	0	0.000812018	0.365255	0.365255	0	0	0	0	0	0	0	0	0	0	0	0	0	0	0	0	0	0	0	0	0	0	0	0	0	0	0	0	0	0.0203004	0	0	0	0	0	0	0	0	0	0	0	0
Cofactors, Vitamins, Prosthetic Groups, Pigments	Quinone cofactors	Coenzyme PQQ synthesis	Coenzyme PQQ synthesis protein D	0	0.000812018	0.365255	0.365255	0	0	0	0	0	0	0	0	0	0	0	0	0	0	0	0	0	0	0	0	0	0	0	0	0	0	0	0	0	0.0203004	0	0	0	0	0	0	0	0	0	0	0	0
Cofactors, Vitamins, Prosthetic Groups, Pigments	Cofactors, Vitamins, Prosthetic Groups, Pigments	Molybdopterin cytosine dinucleotide	Periplasmic aromatic aldehyde oxidoreductase, FAD binding subunit YagS	0	0.000433981	0.365255	0.365255	0	0	0	0	0	0	0	0	0	0	0	0	0	0	0	0	0	0	0	0	0	0	0	0	0	0	0	0	0	0	0	0	0	0	0	0	0	0	0.0108495	0	0	0
Cofactors, Vitamins, Prosthetic Groups, Pigments	Coenzyme M	coenzyme M biosynthesis	L-sulfolactate dehydrogenase (EC 1.1.1.272)	0	0.00197922	0.365255	0.365255	0	0	0	0	0	0	0	0	0	0	0	0	0	0	0	0	0	0	0	0	0	0	0	0	0	0	0	0	0	0	0	0	0	0	0	0	0	0	0	0	0.0494805	0
Cofactors, Vitamins, Prosthetic Groups, Pigments	Tetrapyrroles	Coenzyme B12 biosynthesis	CblZ, a non-orthologous displasment for Alpha-ribazole-5'-phosphate phosphatase	0	0.000670803	0.365255	0.365255	0	0	0	0	0	0	0	0	0	0	0	0	0	0	0	0	0	0	0	0	0	0	0.0167701	0	0	0	0	0	0	0	0	0	0	0	0	0	0	0	0	0	0	0
Cofactors, Vitamins, Prosthetic Groups, Pigments	Folate and pterines	Molybdenum cofactor biosynthesis	Periplasmic molybdate-binding domain	0	0.000694324	0.365255	0.365255	0	0	0	0	0	0	0	0	0	0	0	0	0	0	0	0	0	0	0	0	0	0	0	0	0	0	0	0	0	0	0	0	0	0	0	0	0	0	0	0	0	0
Cofactors, Vitamins, Prosthetic Groups, Pigments	Folate and pterines	Folate Biosynthesis	Dihydroneopterin triphosphate pyrophosphohydolase	0	0.00132538	0.365255	0.365255	0	0	0	0	0	0	0	0	0	0	0	0	0	0	0	0	0	0	0	0	0	0	0	0.0331345	0	0	0	0	0	0	0	0	0	0	0	0	0	0	0	0	0	0
Cofactors, Vitamins, Prosthetic Groups, Pigments	Biotin	Biotin biosynthesis	ATPase component BioM of energizing module of biotin ECF transporter	0	0.000670803	0.365255	0.365255	0	0	0	0	0	0	0	0	0	0	0	0	0	0	0	0	0	0	0	0	0	0	0.0167701	0	0	0	0	0	0	0	0	0	0	0	0	0	0	0	0	0	0	0
Cofactors, Vitamins, Prosthetic Groups, Pigments	NAD and NADP	NAD and NADP cofactor biosynthesis global	Tryptophan 2,3-dioxygenase (EC 1.13.11.11) - #2	0	0.00107904	0.365255	0.365255	0	0	0	0	0	0	0	0	0	0	0	0	0	0	0	0	0	0	0	0	0	0	0	0	0	0	0	0	0	0	0	0	0	0	0.026976	0	0	0	0	0	0	0
Cofactors, Vitamins, Prosthetic Groups, Pigments	Tetrapyrroles	Coenzyme B12 biosynthesis	Aerobic cobaltochelatase CobS subunit (EC 6.6.1.2)	0	0.00134161	0.365255	0.365255	0	0	0	0	0	0	0	0	0	0	0	0	0	0	0	0	0	0	0	0	0	0	0.0335402	0	0	0	0	0	0	0	0	0	0	0	0	0	0	0	0	0	0	0
Cofactors, Vitamins, Prosthetic Groups, Pigments	Quinone cofactors	Menaquinone and Phylloquinone Biosynthesis	1,4-dihydroxy-2-naphthoate octaprenyltransferase (EC 2.5.1.-)	0.038737	0.0124787	0.371007	0.371007	0	0	0	0	0	0.0540346	0.0192049	0.0309502	0.0470367	0	0	0.662252	0	0	0	0	0	0	0	0	0	0.0531632	0	0.0331345	0.0190259	0	0	0	0	0	0	0.0551876	0	0	0	0	0.0625391	0	0.0433981	0	0	0.0281611
Cofactors, Vitamins, Prosthetic Groups, Pigments	Tetrapyrroles	Coenzyme B12 biosynthesis	Cobyrinic acid A,C-diamide synthase - #1	0.0315358	0.00576796	0.381051	0.381051	0	0	0	0	0	0	0	0	0	0	0	0.662252	0	0	0	0	0	0	0	0	0	0	0.0670803	0.0662691	0	0	0	0	0	0	0	0	0	0	0	0	0	0	0.0108495	0	0	0
Cofactors, Vitamins, Prosthetic Groups, Pigments	Tetrapyrroles	Cobalamin synthesis	Cobyrinic acid A,C-diamide synthase	0.0315358	0.00576796	0.381051	0.381051	0	0	0	0	0	0	0	0	0	0	0	0.662252	0	0	0	0	0	0	0	0	0	0	0.0670803	0.0662691	0	0	0	0	0	0	0	0	0	0	0	0	0	0	0.0108495	0	0	0
Cofactors, Vitamins, Prosthetic Groups, Pigments	Folate and pterines	5-FCL-like protein	Phosphoribosylaminoimidazolecarboxamide formyltransferase (EC 2.1.2.3)	0.0657022	0.0295798	0.384138	0.384138	0	0	0.0997009	0	0	0.0360231	0.0576147	0.0309502	0	0.0820513	0.0608273	0	0.0951475	0.917431	0	0	0	0	0	0	0	0.0531632	0.0503102	0.0331345	0	0.0966184	0	0.104275	0	0	0.0819001	0	0	0	0.026976	0.21322	0.0625391	0	0	0	0	0
Cofactors, Vitamins, Prosthetic Groups, Pigments	Quinone cofactors	Pyrroloquinoline Quinone biosynthesis	Coenzyme PQQ synthesis protein C - #1	0.00311236	0.00676374	0.392157	0.392157	0	0	0	0	0	0	0	0	0	0	0	0	0	0	0	0.0653595	0	0	0	0	0	0	0.0167701	0	0	0	0	0	0	0.0203004	0	0.0551876	0	0	0	0	0.0312695	0	0.0108495	0	0	0
Cofactors, Vitamins, Prosthetic Groups, Pigments	Quinone cofactors	Coenzyme PQQ synthesis	Coenzyme PQQ synthesis protein C	0.00311236	0.00676374	0.392157	0.392157	0	0	0	0	0	0	0	0	0	0	0	0	0	0	0	0.0653595	0	0	0	0	0	0	0.0167701	0	0	0	0	0	0	0.0203004	0	0.0551876	0	0	0	0	0.0312695	0	0.0108495	0	0	0
Cofactors, Vitamins, Prosthetic Groups, Pigments	Folate and pterines	Pterin carbinolamine dehydratase	Maleylacetoacetate isomerase (EC 5.2.1.2)	0.00311236	0.00711793	0.392978	0.392978	0	0	0	0	0	0	0	0	0	0	0	0	0	0	0	0.0653595	0	0	0	0	0	0	0	0	0	0	0	0	0	0.0406009	0	0.0551876	0	0	0.053952	0	0	0	0.0108495	0	0	0
Cofactors, Vitamins, Prosthetic Groups, Pigments	Folate and pterines	Pterin metabolism 3	Maleylacetoacetate isomerase (EC 5.2.1.2) - #1	0.00311236	0.00711793	0.392978	0.392978	0	0	0	0	0	0	0	0	0	0	0	0	0	0	0	0.0653595	0	0	0	0	0	0	0	0	0	0	0	0	0	0.0406009	0	0.0551876	0	0	0.053952	0	0	0	0.0108495	0	0	0
Cofactors, Vitamins, Prosthetic Groups, Pigments	Tetrapyrroles	Coenzyme B12 biosynthesis	Cob(I)alamin adenosyltransferase (EC 2.5.1.17) - #1	0.00286812	0.005476	0.397161	0.397161	0	0	0	0	0	0	0.0192049	0	0	0.0410256	0	0	0	0	0	0	0	0	0	0	0	0.0265816	0.0167701	0.0331345	0	0.0322061	0	0	0	0	0	0	0	0	0	0	0	0	0.0108495	0	0	0
Cofactors, Vitamins, Prosthetic Groups, Pigments	Tetrapyrroles	Cobalamin synthesis	Cob(I)alamin adenosyltransferase (EC 2.5.1.17)	0.00286812	0.005476	0.397161	0.397161	0	0	0	0	0	0	0.0192049	0	0	0.0410256	0	0	0	0	0	0	0	0	0	0	0	0.0265816	0.0167701	0.0331345	0	0.0322061	0	0	0	0	0	0	0	0	0	0	0	0	0.0108495	0	0	0
Cofactors, Vitamins, Prosthetic Groups, Pigments	Quinone cofactors	Menaquinone Biosynthesis via Futalosine -- gjo	4-hydroxybenzoate polyprenyltransferase (EC 2.5.1.-)	0.00280584	0.0063849	0.3977	0.3977	0	0	0	0	0	0	0.0384098	0	0	0.0205128	0	0	0	0	0	0	0	0	0	0	0	0	0	0	0.0380518	0	0	0	0	0.0203004	0	0	0	0.0742942	0.026976	0	0	0	0	0	0	0
Cofactors, Vitamins, Prosthetic Groups, Pigments	Folate and pterines	YgfZ	Adenosylcobinamide-phosphate synthase	0.00622471	0.0131581	0.400553	0.400553	0	0	0	0	0	0	0	0	0	0	0	0	0	0	0	0.130719	0	0	0	0	0	0	0.0167701	0	0	0	0	0	0	0.0812018	0	0	0	0	0.026976	0	0.0312695	0	0.021699	0	0.0989609	0
Cofactors, Vitamins, Prosthetic Groups, Pigments	Folate and pterines	YgfZ	Anaerobic dimethyl sulfoxide reductase chain B (EC 1.8.99.-)	0.00183449	0.000670803	0.400741	0.400741	0	0	0	0	0	0.0180115	0	0	0	0.0205128	0	0	0	0	0	0	0	0	0	0	0	0	0.0167701	0	0	0	0	0	0	0	0	0	0	0	0	0	0	0	0	0	0	0
Cofactors, Vitamins, Prosthetic Groups, Pigments	Folate and pterines	5-FCL-like protein	Thiamine-monophosphate kinase (EC 2.7.4.16) - #1	0.0094942	0.0163943	0.401652	0.401652	0	0	0	0	0	0	0	0	0	0.0205128	0	0	0	0	0	0.130719	0	0.0481464	0	0	0	0.0531632	0.0335402	0	0	0.0322061	0	0	0	0.0609013	0.0819001	0	0	0	0.053952	0	0.0312695	0	0.0108495	0	0	0
Cofactors, Vitamins, Prosthetic Groups, Pigments	Cofactors, Vitamins, Prosthetic Groups, Pigments	Thiamin biosynthesis	Thiamine-monophosphate kinase (EC 2.7.4.16)	0.0094942	0.0163943	0.401652	0.401652	0	0	0	0	0	0	0	0	0	0.0205128	0	0	0	0	0	0.130719	0	0.0481464	0	0	0	0.0531632	0.0335402	0	0	0.0322061	0	0	0	0.0609013	0.0819001	0	0	0	0.053952	0	0.0312695	0	0.0108495	0	0	0
Cofactors, Vitamins, Prosthetic Groups, Pigments	Tetrapyrroles	Coenzyme B12 biosynthesis	Nicotinate-nucleotide--dimethylbenzimidazole phosphoribosyltransferase (EC 2.4.2.21) - #1	0.00495653	0.00933891	0.415045	0.415045	0	0	0	0	0	0	0.0192049	0.0309502	0.0235183	0	0.0304136	0	0	0	0	0	0	0	0	0	0	0.0797448	0.0167701	0	0	0.0644122	0	0	0	0	0	0.0551876	0	0	0	0	0	0	0	0	0	0
Cofactors, Vitamins, Prosthetic Groups, Pigments	Tetrapyrroles	Cobalamin synthesis	Nicotinate-nucleotide--dimethylbenzimidazole phosphoribosyltransferase (EC 2.4.2.21)	0.00495653	0.00933891	0.415045	0.415045	0	0	0	0	0	0	0.0192049	0.0309502	0.0235183	0	0.0304136	0	0	0	0	0	0	0	0	0	0	0.0797448	0.0167701	0	0	0.0644122	0	0	0	0	0	0.0551876	0	0	0	0	0	0	0	0	0	0
Cofactors, Vitamins, Prosthetic Groups, Pigments	Folate and pterines	YgfZ	GTPase and tRNA-U34 5-formylation enzyme TrmE - #2	0.00891902	0.0146401	0.426444	0.426444	0	0	0	0	0	0	0.0384098	0	0.0470367	0.0410256	0.0608273	0	0	0	0	0	0	0	0	0	0	0	0.0335402	0.0331345	0.0190259	0	0.101215	0	0	0.0203004	0.0819001	0.0551876	0	0	0	0	0	0	0.021699	0	0	0
Cofactors, Vitamins, Prosthetic Groups, Pigments	Cofactors, Vitamins, Prosthetic Groups, Pigments	Thiamin biosynthesis	Sulfur carrier protein ThiS	0.00453083	0.00112644	0.43517	0.43517	0	0	0	0	0	0	0	0	0	0	0	0	0.0951475	0	0	0	0	0	0	0	0	0	0	0	0	0	0	0	0	0	0	0	0	0	0	0	0	0	0	0	0	0.0281611
Cofactors, Vitamins, Prosthetic Groups, Pigments	Pyridoxine	Pyridoxin (Vitamin B6) Biosynthesis	Pyridoxine biosynthesis glutamine amidotransferase, synthase subunit (EC 2.4.2.-)	0.0266028	0.00749062	0.446223	0.446223	0	0	0	0	0	0	0	0	0	0	0	0	0	0	0	0	0	0	0.558659	0	0	0.0265816	0.0167701	0	0	0	0	0	0	0	0	0	0	0	0	0	0.0312695	0	0	0	0	0.112644
Cofactors, Vitamins, Prosthetic Groups, Pigments	Cofactors, Vitamins, Prosthetic Groups, Pigments	Thiamin biosynthesis	Thiamin pyrophosphokinase (EC 2.7.6.2) - #1	0.00480803	0.0111853	0.446946	0.446946	0	0	0	0	0	0	0	0	0.070555	0	0.0304136	0	0	0	0	0	0	0	0	0	0	0	0	0	0	0	0	0	0	0	0	0	0	0	0.026976	0	0.0312695	0	0.021699	0.171527	0	0.0281611
Cofactors, Vitamins, Prosthetic Groups, Pigments	Biotin	Biotin biosynthesis	3-ketoacyl-CoA thiolase (EC 2.3.1.16) - #3	0.0803169	0.0542319	0.452295	0.452295	0	0	0	0	0	0.108069	0.0384098	0.0619003	0.0470367	0.0820513	0.0304136	0	0	0	0	0.326797	0	0.433317	0.558659	0	0	0	0.10062	0	0.114155	0.0322061	0.101215	0	0	0.162404	0.0819001	0	0	0	0.107904	0.21322	0.0312695	0	0.0867961	0	0.0989609	0
Cofactors, Vitamins, Prosthetic Groups, Pigments	NAD and NADP	NAD and NADP cofactor biosynthesis global	Nicotinamidase family protein YcaC	0.00183449	0.000761035	0.455783	0.455783	0	0	0	0	0	0.0180115	0	0	0	0.0205128	0	0	0	0	0	0	0	0	0	0	0	0	0	0	0.0190259	0	0	0	0	0	0	0	0	0	0	0	0	0	0	0	0	0
Cofactors, Vitamins, Prosthetic Groups, Pigments	Folate and pterines	YgfZ	Orotate phosphoribosyltransferase (EC 2.4.2.10)	0.0128024	0.0201852	0.468149	0.468149	0	0	0	0	0	0.0360231	0.0192049	0	0.0470367	0.0410256	0.0304136	0	0.0951475	0	0	0	0	0	0	0	0	0.0797448	0.0335402	0.165673	0.0380518	0	0	0.104275	0	0	0	0	0	0	0.026976	0	0	0	0.0108495	0	0	0.0281611
Cofactors, Vitamins, Prosthetic Groups, Pigments	Folate and pterines	Molybdenum cofactor biosynthesis	Molybdopterin biosynthesis protein MoeB	0.00177221	0.000761035	0.471824	0.471824	0	0	0	0	0	0.0180115	0.0192049	0	0	0	0	0	0	0	0	0	0	0	0	0	0	0	0	0	0.0190259	0	0	0	0	0	0	0	0	0	0	0	0	0	0	0	0	0
Cofactors, Vitamins, Prosthetic Groups, Pigments	Pyridoxine	Pyridoxin (Vitamin B6) Biosynthesis	Pyridoxal kinase (EC 2.7.1.35)	0.0174914	0.00796058	0.472373	0.472373	0	0	0	0	0	0	0	0.0309502	0	0.0205128	0.0304136	0	0.285442	0	0	0	0	0	0	0	0	0.0265816	0.0167701	0	0	0	0	0	0	0	0	0	0	0	0	0	0	0	0.021699	0	0.0494805	0.0844832
Cofactors, Vitamins, Prosthetic Groups, Pigments	Quinone cofactors	Ubiquinone Biosynthesis	Protein YigP (COG3165) clustered with ubiquinone biosynthetic genes	0.00861224	0.0043369	0.47878	0.47878	0	0	0	0	0	0	0.0192049	0	0	0	0	0	0	0	0	0.0653595	0	0.0962927	0	0	0	0	0.0167701	0	0	0	0	0	0	0	0	0	0	0.0742942	0	0	0	0	0	0	0	0
Cofactors, Vitamins, Prosthetic Groups, Pigments	Folate and pterines	YgfZ	Quinolinate synthetase (EC 2.5.1.72)	0.00292209	0.0051022	0.484912	0.484912	0	0	0	0	0	0	0	0.0309502	0	0	0.0304136	0	0	0	0	0	0	0	0	0	0	0	0	0.0331345	0.0380518	0	0	0	0	0	0	0	0	0	0	0	0	0	0.0108495	0	0	0.0281611
Cofactors, Vitamins, Prosthetic Groups, Pigments	Biotin	Biotin biosynthesis	Biotin-protein ligase (EC 6.3.4.15) - #1	0.0246332	0.0178308	0.48556	0.48556	0	0.0956938	0.0997009	0	0	0.0540346	0.0576147	0.0309502	0.0470367	0.0410256	0.0912409	0	0	0	0	0	0	0	0	0	0	0.0265816	0.0670803	0	0	0.0322061	0	0	0	0	0	0	0	0	0	0	0	0	0.021699	0	0	0.0281611
Cofactors, Vitamins, Prosthetic Groups, Pigments	Pyridoxine	Pyridoxin (Vitamin B6) Biosynthesis	Pyridoxine 5'-phosphate synthase (EC 2.6.99.2)	0.0123623	0.00745011	0.489262	0.489262	0	0	0	0	0	0	0.0192049	0	0	0.0615385	0	0	0	0	0	0.130719	0	0.0481464	0	0	0	0	0.0335402	0	0.0380518	0	0	0	0	0	0	0	0	0	0.026976	0	0.0312695	0	0.021699	0	0	0
Cofactors, Vitamins, Prosthetic Groups, Pigments	Folate and pterines	Molybdenum cofactor biosynthesis	Molybdenum ABC transporter, periplasmic molybdenum-binding protein ModA (TC 3.A.1.8.1)	0.00721527	0.00393651	0.499946	0.499946	0	0	0	0	0	0.0360231	0.0192049	0	0	0	0	0	0	0	0	0	0	0.0962927	0	0	0	0	0.0167701	0.0331345	0	0	0	0	0	0.0203004	0	0	0	0	0	0	0	0	0.0108495	0	0	0
Cofactors, Vitamins, Prosthetic Groups, Pigments	Folate and pterines	YgfZ	Flavodoxin reductases (ferredoxin-NADPH reductases) family 1	0.0369541	0.0171761	0.5069	0.5069	0	0	0	0	0	0.0180115	0	0	0	0	0.0304136	0.662252	0	0	0	0.0653595	0	0	0	0	0	0	0.0335402	0	0.0190259	0	0	0	0	0.0812018	0	0	0	0.0742942	0.080928	0	0	0	0	0	0	0
Cofactors, Vitamins, Prosthetic Groups, Pigments	Folate and pterines	Pterin carbinolamine dehydratase	Homogentisate 1,2-dioxygenase (EC 1.13.11.5)	0.00779257	0.0136388	0.51114	0.51114	0	0	0	0	0	0	0.0192049	0	0	0	0	0	0	0	0	0	0	0.144439	0	0	0	0	0.0335402	0	0	0	0	0	0	0.0406009	0	0.110375	0	0.0742942	0.053952	0	0	0	0.0108495	0	0	0
Cofactors, Vitamins, Prosthetic Groups, Pigments	Folate and pterines	Pterin metabolism 3	Homogentisate 1,2-dioxygenase (EC 1.13.11.5) - #1	0.00779257	0.0136388	0.51114	0.51114	0	0	0	0	0	0	0.0192049	0	0	0	0	0	0	0	0	0	0	0.144439	0	0	0	0	0.0335402	0	0	0	0	0	0	0.0406009	0	0.110375	0	0.0742942	0.053952	0	0	0	0.0108495	0	0	0
Cofactors, Vitamins, Prosthetic Groups, Pigments	Folate and pterines	Molybdenum cofactor biosynthesis	Molybdate-binding domain of ModE	0.00463747	0.00736411	0.51598	0.51598	0	0	0	0	0	0.0360231	0	0.0309502	0	0	0.0304136	0	0	0	0	0	0	0	0	0	0	0	0	0.0331345	0	0	0	0	0	0.0406009	0	0	0	0	0.053952	0	0	0	0.021699	0	0	0
Cofactors, Vitamins, Prosthetic Groups, Pigments	Riboflavin, FMN, FAD	Riboflavin, FMN and FAD metabolism	FMN adenylyltransferase (EC 2.7.7.2) - #1	0.0245455	0.0333246	0.517182	0.517182	0	0.0956938	0	0	0	0.0180115	0.0384098	0.0309502	0.0235183	0.0205128	0.0304136	0	0	0	0	0.0653595	0	0.192585	0	0	0	0.0265816	0.0335402	0.0331345	0.0190259	0.0966184	0	0	0	0.0203004	0	0.110375	0	0	0.026976	0	0.0938086	0	0.0325486	0.171527	0.0494805	0.0844832
Cofactors, Vitamins, Prosthetic Groups, Pigments	Riboflavin, FMN, FAD	riboflavin to FAD	FMN adenylyltransferase (EC 2.7.7.2) - #2	0.0245455	0.0333246	0.517182	0.517182	0	0.0956938	0	0	0	0.0180115	0.0384098	0.0309502	0.0235183	0.0205128	0.0304136	0	0	0	0	0.0653595	0	0.192585	0	0	0	0.0265816	0.0335402	0.0331345	0.0190259	0.0966184	0	0	0	0.0203004	0	0.110375	0	0	0.026976	0	0.0938086	0	0.0325486	0.171527	0.0494805	0.0844832
Cofactors, Vitamins, Prosthetic Groups, Pigments	Riboflavin, FMN, FAD	riboflavin to FAD	Riboflavin kinase (EC 2.7.1.26) - #2	0.0245455	0.0333246	0.517182	0.517182	0	0.0956938	0	0	0	0.0180115	0.0384098	0.0309502	0.0235183	0.0205128	0.0304136	0	0	0	0	0.0653595	0	0.192585	0	0	0	0.0265816	0.0335402	0.0331345	0.0190259	0.0966184	0	0	0	0.0203004	0	0.110375	0	0	0.026976	0	0.0938086	0	0.0325486	0.171527	0.0494805	0.0844832
Cofactors, Vitamins, Prosthetic Groups, Pigments	Riboflavin, FMN, FAD	Riboflavin, FMN and FAD metabolism	Riboflavin kinase (EC 2.7.1.26) - #1	0.0245455	0.0333246	0.517182	0.517182	0	0.0956938	0	0	0	0.0180115	0.0384098	0.0309502	0.0235183	0.0205128	0.0304136	0	0	0	0	0.0653595	0	0.192585	0	0	0	0.0265816	0.0335402	0.0331345	0.0190259	0.0966184	0	0	0	0.0203004	0	0.110375	0	0	0.026976	0	0.0938086	0	0.0325486	0.171527	0.0494805	0.0844832
Cofactors, Vitamins, Prosthetic Groups, Pigments	NAD and NADP	NAD and NADP cofactor biosynthesis global	Nicotinamidase (EC 3.5.1.19)	0.013764	0.0204688	0.530304	0.530304	0	0.0956938	0.0997009	0	0	0	0.0192049	0	0.0235183	0.0205128	0.0304136	0	0	0	0	0	0	0	0	0	0	0	0.0167701	0	0	0.0644122	0	0	0	0	0	0	0	0	0	0	0.0625391	0	0.0325486	0.171527	0.0494805	0.0281611
Cofactors, Vitamins, Prosthetic Groups, Pigments	NAD and NADP	NAD regulation	Nicotinamidase (EC 3.5.1.19) - #1	0.013764	0.0204688	0.530304	0.530304	0	0.0956938	0.0997009	0	0	0	0.0192049	0	0.0235183	0.0205128	0.0304136	0	0	0	0	0	0	0	0	0	0	0	0.0167701	0	0	0.0644122	0	0	0	0	0	0	0	0	0	0	0.0625391	0	0.0325486	0.171527	0.0494805	0.0281611
Cofactors, Vitamins, Prosthetic Groups, Pigments	Tetrapyrroles	Heme and Siroheme Biosynthesis	Glutamyl-tRNA reductase (EC 1.2.1.70) - #1	0.0120933	0.0172395	0.539777	0.539777	0	0	0	0	0	0.0180115	0.0384098	0.0309502	0	0.0410256	0.0304136	0	0.0951475	0	0	0	0	0	0	0	0	0	0.0503102	0	0	0.0322061	0.101215	0	0	0	0	0	0	0.0742942	0	0	0	0	0.0325486	0	0	0
Cofactors, Vitamins, Prosthetic Groups, Pigments	Folate and pterines	Folate Biosynthesis	Dihydroneopterin triphosphate pyrophosphohydrolase type 2 (nudB)	0.00147382	0.00388523	0.551234	0.551234	0	0	0	0	0	0	0	0.0309502	0	0	0	0	0	0	0	0	0	0	0	0	0	0	0	0	0	0	0	0	0	0	0	0	0	0	0	0	0	0	0.0108495	0	0	0
Cofactors, Vitamins, Prosthetic Groups, Pigments	Pyridoxine	Pyridoxin (Vitamin B6) Biosynthesis	Erythronate-4-phosphate dehydrogenase (EC 1.1.1.290)	0.0221612	0.0128565	0.559488	0.559488	0	0	0	0	0	0.0540346	0	0.0309502	0.0235183	0.0410256	0.0304136	0	0.285442	0	0	0	0	0	0	0	0	0.0265816	0	0	0	0	0	0.208551	0	0	0	0	0	0	0	0	0	0	0	0	0	0
Cofactors, Vitamins, Prosthetic Groups, Pigments	Quinone cofactors	Menaquinone and Phylloquinone Biosynthesis	Menaquinone-specific isochorismate synthase (EC 5.4.4.2)	0.00842972	0.0138757	0.559813	0.559813	0	0	0	0	0	0	0	0.0309502	0	0.0205128	0.0304136	0	0.0951475	0	0	0	0	0	0	0	0	0.0265816	0.0503102	0.0662691	0	0.0322061	0	0	0	0	0	0	0	0	0	0	0	0	0	0.171527	0	0
Cofactors, Vitamins, Prosthetic Groups, Pigments	Folate and pterines	5-FCL-like protein	Phosphoribosylglycinamide formyltransferase (EC 2.1.2.2)	0.0262499	0.0138273	0.560311	0.560311	0	0	0	0	0	0.0180115	0	0	0	0.0615385	0	0	0	0	0	0	0	0	0	0	0.471698	0.0265816	0.0503102	0.0662691	0.0380518	0	0	0	0	0	0	0	0	0	0.026976	0	0.0312695	0	0	0	0	0.0281611
Cofactors, Vitamins, Prosthetic Groups, Pigments	Riboflavin, FMN, FAD	Flavodoxin	Flavodoxin 2	0.00521477	0.00778838	0.572115	0.572115	0	0	0	0	0	0	0	0.0309502	0	0	0.0304136	0	0	0	0	0	0	0.0481464	0	0	0	0	0.0167701	0	0	0	0	0	0	0.0203004	0	0	0	0.0742942	0.026976	0	0	0	0.0108495	0	0	0.0281611
Cofactors, Vitamins, Prosthetic Groups, Pigments	Folate and pterines	5-FCL-like protein	Serine hydroxymethyltransferase (EC 2.1.2.1) - #6	0.0300481	0.039209	0.587611	0.587611	0	0	0.0997009	0	0	0.0720461	0.0960246	0.0309502	0.070555	0.0410256	0.0304136	0	0.190295	0	0	0	0	0	0	0	0	0	0.0167701	0.0331345	0	0.225443	0	0.104275	0.194742	0.0203004	0	0.110375	0	0	0.026976	0	0.0625391	0	0.0325486	0	0.0494805	0
Cofactors, Vitamins, Prosthetic Groups, Pigments	Folate and pterines	YgfZ-Iron	COG1272: Predicted membrane protein hemolysin III homolog	0.0115976	0.00758986	0.588228	0.588228	0	0	0	0	0	0	0.0384098	0.123801	0	0.0205128	0.0608273	0	0	0	0	0	0	0	0	0	0	0.0265816	0	0	0	0	0	0	0	0	0	0	0	0.0742942	0	0	0	0	0.0325486	0	0	0.0563222
Cofactors, Vitamins, Prosthetic Groups, Pigments	Cofactors, Vitamins, Prosthetic Groups, Pigments	Thiamin biosynthesis	Hydroxyethylthiazole kinase (EC 2.7.1.50)	0.00380533	0.00611729	0.591848	0.591848	0	0	0	0	0	0.0180115	0	0.0619003	0	0	0	0	0	0	0	0	0	0	0	0	0	0	0	0.0331345	0	0.0322061	0	0	0	0	0	0	0	0	0	0	0.0312695	0	0	0	0	0.0563222
Cofactors, Vitamins, Prosthetic Groups, Pigments	Folate and pterines	5-FCL-like protein	Hydroxyethylthiazole kinase (EC 2.7.1.50) - #1	0.00380533	0.00611729	0.591848	0.591848	0	0	0	0	0	0.0180115	0	0.0619003	0	0	0	0	0	0	0	0	0	0	0	0	0	0	0	0.0331345	0	0.0322061	0	0	0	0	0	0	0	0	0	0	0.0312695	0	0	0	0	0.0563222
Cofactors, Vitamins, Prosthetic Groups, Pigments	Folate and pterines	YgfZ	Queuosine Biosynthesis QueC ATPase	0.00345143	0.0021374	0.592385	0.592385	0	0	0	0	0	0.0180115	0	0.0309502	0.0235183	0	0	0	0	0	0	0	0	0	0	0	0	0	0	0.0331345	0	0	0	0	0	0.0203004	0	0	0	0	0	0	0	0	0	0	0	0
Cofactors, Vitamins, Prosthetic Groups, Pigments	NAD and NADP	NAD and NADP cofactor biosynthesis global	NAD kinase (EC 2.7.1.23) - #1	0.0287946	0.0223767	0.593703	0.593703	0	0.0956938	0	0	0	0.0720461	0.0192049	0	0.0235183	0.0410256	0.0608273	0	0	0	0	0.196078	0	0.0962927	0	0	0	0	0.0167701	0.0331345	0.0570776	0	0	0	0	0.0406009	0.0819001	0.0551876	0	0	0.053952	0	0.0625391	0	0.021699	0	0	0.0844832
Cofactors, Vitamins, Prosthetic Groups, Pigments	Lipoic acid	Lipoic acid metabolism	Octanoate-[acyl-carrier-protein]-protein-N-octanoyltransferase	0.0046943	0.0072725	0.606938	0.606938	0	0	0	0	0	0.0180115	0.0192049	0.0309502	0	0	0.0304136	0	0	0	0	0	0	0	0	0	0	0.0265816	0.0167701	0.0994036	0	0	0	0	0	0	0	0	0	0	0	0	0	0	0.021699	0	0	0
Cofactors, Vitamins, Prosthetic Groups, Pigments	Coenzyme A	Coenzyme A Biosynthesis	Pantoate--beta-alanine ligase (EC 6.3.2.1) - #1	0.016094	0.0119234	0.630147	0.630147	0	0.0956938	0	0	0	0.0180115	0	0.0309502	0.0235183	0	0.121655	0	0	0	0	0	0	0.0481464	0	0	0	0	0.0167701	0	0.0380518	0	0	0	0	0.0203004	0	0	0	0.0742942	0	0	0	0	0.0108495	0	0.0494805	0
Cofactors, Vitamins, Prosthetic Groups, Pigments	Folate and pterines	YgfZ	Dihydroorotase (EC 3.5.2.3)	0.0340821	0.0455416	0.632186	0.632186	0	0	0	0	0	0.0360231	0.0384098	0	0.0235183	0.0205128	0.0304136	0	0.0951475	0	0	0	0	0	0	0	0.471698	0.0531632	0.0335402	0	0.0380518	0.0322061	0	0	0	0.0203004	0.0819001	0	0	0.0742942	0.080928	0.21322	0.0625391	0	0.0650971	0	0.0494805	0.168966
Cofactors, Vitamins, Prosthetic Groups, Pigments	Tetrapyrroles	Heme and Siroheme Biosynthesis	Glutamate-1-semialdehyde aminotransferase (EC 5.4.3.8) - #1	0.0146952	0.0196941	0.632775	0.632775	0	0	0	0	0	0.144092	0.0384098	0.0309502	0	0	0	0	0.0951475	0	0	0	0	0	0	0	0	0	0	0.0994036	0.0190259	0.0322061	0	0	0.097371	0	0.0819001	0.0551876	0	0	0.026976	0	0	0	0.0108495	0	0	0
Cofactors, Vitamins, Prosthetic Groups, Pigments	Quinone cofactors	Menaquinone Biosynthesis via Futalosine -- gjo	3-polyprenyl-4-hydroxybenzoate carboxy-lyase UbiX (EC 4.1.1.-)	0.0308864	0.019222	0.64061	0.64061	0	0	0	0	0	0.0360231	0	0	0.0235183	0	0.0304136	0	0	0	0	0	0	0	0.558659	0	0	0	0.0335402	0	0.0190259	0.0322061	0	0	0	0.0203004	0.0819001	0.0551876	0	0.0742942	0.026976	0	0.0312695	0	0.0108495	0	0.0494805	0.0281611
Cofactors, Vitamins, Prosthetic Groups, Pigments	NAD and NADP	NAD and NADP cofactor biosynthesis global	ADP-ribose pyrophosphatase (EC 3.6.1.13) - #1	0.0233876	0.0308713	0.640899	0.640899	0	0	0.0997009	0	0	0.0540346	0.0192049	0.0309502	0.0470367	0	0.0304136	0	0	0	0	0.0653595	0	0.144439	0	0	0	0	0.10062	0	0	0	0	0	0	0.0203004	0.0819001	0.0551876	0	0.297177	0.053952	0	0	0	0.0542476	0	0	0.0563222
Cofactors, Vitamins, Prosthetic Groups, Pigments	Folate and pterines	YgfZ	S-formylglutathione hydrolase (EC 3.1.2.12)	0.012343	0.00953241	0.642511	0.642511	0	0	0	0	0	0.0540346	0.0384098	0.0619003	0.0235183	0.0205128	0.0608273	0	0	0	0	0	0	0	0	0	0	0.0265816	0	0	0.0190259	0	0	0	0	0.0203004	0	0	0	0.0742942	0	0	0.0312695	0	0	0	0.0494805	0
Cofactors, Vitamins, Prosthetic Groups, Pigments	Tetrapyrroles	Coenzyme B12 biosynthesis	Vitamin B12 ABC transporter, B12-binding component BtuF	0.0150699	0.0116752	0.649366	0.649366	0	0	0	0	0	0.0180115	0.0384098	0.0619003	0	0.0410256	0.0608273	0	0	0	0	0	0	0.0962927	0	0	0	0	0.0167701	0	0	0	0	0	0	0.0203004	0.0819001	0.0551876	0	0	0.026976	0	0.0625391	0	0.0108495	0	0	0
Cofactors, Vitamins, Prosthetic Groups, Pigments	Tetrapyrroles	Coenzyme B12 biosynthesis	Outer membrane vitamin B12 receptor BtuB	0.0143636	0.0111457	0.657747	0.657747	0	0	0	0	0	0	0.0384098	0.0309502	0.0235183	0.0820513	0.0304136	0	0	0	0	0	0	0.0962927	0	0	0	0	0.0503102	0	0.0190259	0	0	0	0	0.0203004	0	0.0551876	0	0.0742942	0.026976	0	0	0	0.0325486	0	0	0
Cofactors, Vitamins, Prosthetic Groups, Pigments	Coenzyme A	Coenzyme A Biosynthesis	3-methyl-2-oxobutanoate hydroxymethyltransferase (EC 2.1.2.11) - #1	0.0172816	0.02288	0.665203	0.665203	0	0.0956938	0.0997009	0	0	0.0360231	0.0192049	0.0309502	0	0.0205128	0.0608273	0	0	0	0	0	0	0	0	0	0	0	0.0167701	0.0331345	0	0	0	0	0	0.0609013	0	0	0	0.148588	0	0.21322	0	0	0.0325486	0	0.0494805	0
Cofactors, Vitamins, Prosthetic Groups, Pigments	Quinone cofactors	Menaquinone Biosynthesis via Futalosine -- gjo	Ubiquinone/menaquinone biosynthesis methyltransferase UbiE (EC 2.1.1.-)	0.00448506	0.00597369	0.694252	0.694252	0	0	0	0	0	0	0.0192049	0.0309502	0.0235183	0.0205128	0	0	0	0	0	0	0	0	0	0	0	0.0265816	0	0.0331345	0.0570776	0	0	0	0	0	0	0	0	0	0	0	0	0	0.0325486	0	0	0
Cofactors, Vitamins, Prosthetic Groups, Pigments	Folate and pterines	YgfZ	Cysteine desulfurase (EC 2.8.1.7) - #3	0.0480325	0.0550466	0.704171	0.704171	0	0.191388	0.199402	0	0	0.108069	0.0960246	0.123801	0.188147	0.0410256	0.0608273	0	0	0	0	0	0	0	0	0	0	0.0265816	0.0670803	0.0994036	0	0.0644122	0	0.104275	0	0.121803	0.0819001	0.0551876	0	0	0.026976	0	0.0938086	0	0.0759466	0.171527	0.0989609	0.140805
Cofactors, Vitamins, Prosthetic Groups, Pigments	Folate and pterines	Molybdenum cofactor biosynthesis	DNA-binding domain of ModE	0.00463747	0.00603872	0.728064	0.728064	0	0	0	0	0	0.0360231	0	0.0309502	0	0	0.0304136	0	0	0	0	0	0	0	0	0	0	0	0	0	0	0	0	0	0	0.0406009	0	0	0	0	0.053952	0	0	0	0.021699	0	0	0
Cofactors, Vitamins, Prosthetic Groups, Pigments	NAD and NADP	NAD regulation	Nicotinamide phosphoribosyltransferase (EC 2.4.2.12) - #1	0.00229268	0.00138865	0.728565	0.728565	0	0	0	0	0	0	0	0	0	0	0	0	0	0	0	0	0	0.0481464	0	0	0	0	0	0	0	0	0	0	0	0	0	0	0	0	0	0	0	0	0	0	0	0
Cofactors, Vitamins, Prosthetic Groups, Pigments	NAD and NADP	NAD and NADP cofactor biosynthesis global	Nicotinamide phosphoribosyltransferase (EC 2.4.2.12)	0.00229268	0.00138865	0.728565	0.728565	0	0	0	0	0	0	0	0	0	0	0	0	0	0	0	0	0	0.0481464	0	0	0	0	0	0	0	0	0	0	0	0	0	0	0	0	0	0	0	0	0	0	0	0
Cofactors, Vitamins, Prosthetic Groups, Pigments	Folate and pterines	Folate Biosynthesis	Dihydropteroate synthase (EC 2.5.1.15) - #1	0.0237389	0.0195178	0.734419	0.734419	0	0.0956938	0.0997009	0	0	0.0540346	0.0192049	0.0309502	0.117592	0.0205128	0.0608273	0	0	0	0	0	0	0	0	0	0	0.0265816	0.0335402	0	0.0190259	0	0	0	0	0.0203004	0	0	0	0	0	0.21322	0.0625391	0	0.021699	0	0	0.0563222
Cofactors, Vitamins, Prosthetic Groups, Pigments	Folate and pterines	Pterin metabolism 3	Dihydropteroate synthase (EC 2.5.1.15) - #2	0.0237389	0.0195178	0.734419	0.734419	0	0.0956938	0.0997009	0	0	0.0540346	0.0192049	0.0309502	0.117592	0.0205128	0.0608273	0	0	0	0	0	0	0	0	0	0	0.0265816	0.0335402	0	0.0190259	0	0	0	0	0.0203004	0	0	0	0	0	0.21322	0.0625391	0	0.021699	0	0	0.0563222
Cofactors, Vitamins, Prosthetic Groups, Pigments	Folate and pterines	YgfZ	Dihydropteroate synthase (EC 2.5.1.15) - #3	0.0237389	0.0195178	0.734419	0.734419	0	0.0956938	0.0997009	0	0	0.0540346	0.0192049	0.0309502	0.117592	0.0205128	0.0608273	0	0	0	0	0	0	0	0	0	0	0.0265816	0.0335402	0	0.0190259	0	0	0	0	0.0203004	0	0	0	0	0	0.21322	0.0625391	0	0.021699	0	0	0.0563222
Cofactors, Vitamins, Prosthetic Groups, Pigments	Cofactors, Vitamins, Prosthetic Groups, Pigments	Molybdopterin cytosine dinucleotide	Periplasmic aromatic aldehyde oxidoreductase, molybdenum binding subunit YagR	0.00233151	0.0034118	0.748515	0.748515	0	0	0	0	0	0.0180115	0	0.0309502	0	0	0	0	0	0	0	0	0	0	0	0	0	0	0	0.0662691	0.0190259	0	0	0	0	0	0	0	0	0	0	0	0	0	0	0	0	0
Cofactors, Vitamins, Prosthetic Groups, Pigments	NAD and NADP	NAD and NADP cofactor biosynthesis global	Nicotinamidase/isochorismatase family protein	0.00538852	0.00394141	0.753299	0.753299	0	0	0	0	0	0.0180115	0	0	0	0	0	0	0.0951475	0	0	0	0	0	0	0	0	0.0265816	0.0167701	0	0	0	0	0	0	0	0	0	0	0	0.026976	0	0	0	0.0108495	0	0	0
Cofactors, Vitamins, Prosthetic Groups, Pigments	Folate and pterines	YgfZ-Iron	Aminodeoxychorismate lyase (EC 4.1.3.38) - #5	0.033453	0.0265773	0.753767	0.753767	0	0	0	0	0	0.0360231	0	0.0309502	0.0470367	0.0205128	0	0	0	0	0	0	0	0.0962927	0	0	0.471698	0.0531632	0.0838504	0.0662691	0.0951294	0.0644122	0	0	0	0	0.0819001	0.0551876	0	0	0.026976	0	0.0312695	0	0.0433981	0	0	0.0281611
Cofactors, Vitamins, Prosthetic Groups, Pigments	Folate and pterines	YgfZ	Aminodeoxychorismate lyase (EC 4.1.3.38) - #4	0.033453	0.0265773	0.753767	0.753767	0	0	0	0	0	0.0360231	0	0.0309502	0.0470367	0.0205128	0	0	0	0	0	0	0	0.0962927	0	0	0.471698	0.0531632	0.0838504	0.0662691	0.0951294	0.0644122	0	0	0	0	0.0819001	0.0551876	0	0	0.026976	0	0.0312695	0	0.0433981	0	0	0.0281611
Cofactors, Vitamins, Prosthetic Groups, Pigments	Folate and pterines	Folate Biosynthesis	Aminodeoxychorismate lyase (EC 4.1.3.38) - #3	0.033453	0.0265773	0.753767	0.753767	0	0	0	0	0	0.0360231	0	0.0309502	0.0470367	0.0205128	0	0	0	0	0	0	0	0.0962927	0	0	0.471698	0.0531632	0.0838504	0.0662691	0.0951294	0.0644122	0	0	0	0	0.0819001	0.0551876	0	0	0.026976	0	0.0312695	0	0.0433981	0	0	0.0281611
Cofactors, Vitamins, Prosthetic Groups, Pigments	Tetrapyrroles	Coenzyme B12 biosynthesis	Alpha-ribazole-5'-phosphate phosphatase (EC 3.1.3.73) - #1	0.00694896	0.00541878	0.762892	0.762892	0	0	0	0	0	0	0.0192049	0.0309502	0	0	0.0304136	0	0	0	0	0.0653595	0	0	0	0	0	0	0	0	0	0	0	0	0	0	0	0.0551876	0	0	0	0	0	0	0.0108495	0	0	0
Cofactors, Vitamins, Prosthetic Groups, Pigments	Tetrapyrroles	Cobalamin synthesis	Alpha-ribazole-5'-phosphate phosphatase (EC 3.1.3.73)	0.00694896	0.00541878	0.762892	0.762892	0	0	0	0	0	0	0.0192049	0.0309502	0	0	0.0304136	0	0	0	0	0.0653595	0	0	0	0	0	0	0	0	0	0	0	0	0	0	0	0.0551876	0	0	0	0	0	0	0.0108495	0	0	0
Cofactors, Vitamins, Prosthetic Groups, Pigments	Cofactors, Vitamins, Prosthetic Groups, Pigments	Thiamin biosynthesis	Sulfur carrier protein adenylyltransferase ThiF	0.00327731	0.00416423	0.775289	0.775289	0	0	0	0	0	0	0.0384098	0	0	0	0.0304136	0	0	0	0	0	0	0	0	0	0	0.0265816	0.0335402	0.0331345	0	0	0	0	0	0	0	0	0	0	0	0	0	0	0.0108495	0	0	0
Cofactors, Vitamins, Prosthetic Groups, Pigments	NAD and NADP	NAD and NADP cofactor biosynthesis global	Glutamine amidotransferase chain of NAD synthetase	0.0744332	0.0576946	0.779783	0.779783	0	0	0	0	0	0.0540346	0	0	0	0	0	0	0	0	0	0.130719	0	0.0962927	0	1.28205	0	0.15949	0.0670803	0.165673	0.0380518	0.128824	0	0.417101	0.194742	0.0406009	0	0.0551876	0	0	0	0	0	0	0.021699	0	0	0.0844832
Cofactors, Vitamins, Prosthetic Groups, Pigments	Cofactors, Vitamins, Prosthetic Groups, Pigments	Thiamin biosynthesis	Thiamin ABC transporter, substrate-binding component	0.00538852	0.00709194	0.781918	0.781918	0	0	0	0	0	0.0180115	0	0	0	0	0	0	0.0951475	0	0	0	0	0	0	0	0	0.0531632	0.0167701	0	0.0190259	0	0	0	0	0	0	0	0	0	0	0	0	0	0	0	0	0
Cofactors, Vitamins, Prosthetic Groups, Pigments	Coenzyme A	Coenzyme A Biosynthesis	Phosphopantothenoylcysteine synthetase (EC 6.3.2.5)	0.0113691	0.0139432	0.786879	0.786879	0	0	0	0	0	0.0540346	0.0192049	0	0.0940734	0.0410256	0.0304136	0	0	0	0	0	0	0	0	0	0	0.0531632	0	0	0	0.0644122	0	0	0	0	0	0	0	0	0	0	0.0312695	0	0.0108495	0.171527	0	0
Cofactors, Vitamins, Prosthetic Groups, Pigments	Folate and pterines	Molybdenum cofactor biosynthesis	Molybdenum transport ATP-binding protein ModC (TC 3.A.1.8.1)	0.0176809	0.0214526	0.7879	0.7879	0	0.0956938	0	0	0	0.0180115	0.0192049	0.0619003	0	0.0205128	0.0608273	0	0.0951475	0	0	0	0	0	0	0	0	0.0265816	0.0167701	0.0331345	0	0.0322061	0	0	0	0.0609013	0.0819001	0	0	0	0	0	0	0.273973	0.0108495	0	0	0
Cofactors, Vitamins, Prosthetic Groups, Pigments	Folate and pterines	Folate Biosynthesis	FolM Alternative dihydrofolate reductase 1	0.00245062	0.00194032	0.798859	0.798859	0	0	0	0	0	0	0	0.0309502	0	0.0205128	0	0	0	0	0	0	0	0	0	0	0	0	0	0	0	0	0	0	0	0.0203004	0	0	0	0	0	0	0	0	0.0108495	0	0	0
Cofactors, Vitamins, Prosthetic Groups, Pigments	Tetrapyrroles	Coenzyme B12 biosynthesis	Adenosylcobinamide-phosphate guanylyltransferase (EC 2.7.7.62) - #1	0.00324603	0.00263465	0.803368	0.803368	0	0	0	0	0	0.0180115	0.0192049	0.0309502	0	0	0	0	0	0	0	0	0	0	0	0	0	0	0	0	0	0	0	0	0	0.0203004	0	0	0	0	0	0	0	0	0.0108495	0	0	0
Cofactors, Vitamins, Prosthetic Groups, Pigments	Tetrapyrroles	Cobalamin synthesis	Adenosylcobinamide-phosphate guanylyltransferase (EC 2.7.7.62)	0.00324603	0.00263465	0.803368	0.803368	0	0	0	0	0	0.0180115	0.0192049	0.0309502	0	0	0	0	0	0	0	0	0	0	0	0	0	0	0	0	0	0	0	0	0	0.0203004	0	0	0	0	0	0	0	0	0.0108495	0	0	0
Cofactors, Vitamins, Prosthetic Groups, Pigments	NAD and NADP	NAD regulation	NAD synthetase (EC 6.3.1.5) - #1	0.0817574	0.0669597	0.80382	0.80382	0	0	0	0	0	0.108069	0.0384098	0.0309502	0	0	0.0304136	0	0	0	0	0.130719	0	0.0962927	0	1.28205	0	0.15949	0.0838504	0.165673	0.0380518	0.128824	0	0.417101	0.194742	0.0406009	0	0.110375	0	0	0	0	0.0625391	0	0.0325486	0	0	0.0844832
Cofactors, Vitamins, Prosthetic Groups, Pigments	NAD and NADP	NAD and NADP cofactor biosynthesis global	NAD synthetase (EC 6.3.1.5)	0.0817574	0.0669597	0.80382	0.80382	0	0	0	0	0	0.108069	0.0384098	0.0309502	0	0	0.0304136	0	0	0	0	0.130719	0	0.0962927	0	1.28205	0	0.15949	0.0838504	0.165673	0.0380518	0.128824	0	0.417101	0.194742	0.0406009	0	0.110375	0	0	0	0	0.0625391	0	0.0325486	0	0	0.0844832
Cofactors, Vitamins, Prosthetic Groups, Pigments	Folate and pterines	YgfZ	Folate-dependent protein for Fe/S cluster synthesis/repair in oxidative stress	0.00521477	0.00434697	0.807039	0.807039	0	0	0	0	0	0	0	0.0309502	0	0	0.0304136	0	0	0	0	0	0	0.0481464	0	0	0	0	0.0335402	0.0331345	0	0	0	0	0	0.0203004	0	0	0	0	0	0	0	0	0.021699	0	0	0
Cofactors, Vitamins, Prosthetic Groups, Pigments	Pyridoxine	Pyridoxin (Vitamin B6) Biosynthesis	D-3-phosphoglycerate dehydrogenase (EC 1.1.1.95) - #2	0.07952	0.0641163	0.807168	0.807168	0	0	0	0	0	0	0.0384098	0.0309502	0	0.0410256	0	0	0	0	0	0	0	0.144439	0	0	1.41509	0.106326	0.0670803	0.0994036	0.0570776	0.0966184	0	0.208551	0.097371	0.162404	0	0.110375	0	0.0742942	0.107904	0	0.0625391	0	0.0867961	0	0	0.0563222
Cofactors, Vitamins, Prosthetic Groups, Pigments	Tetrapyrroles	Heme and Siroheme Biosynthesis	Porphobilinogen synthase (EC 4.2.1.24)	0.0117759	0.0102141	0.809173	0.809173	0	0	0	0	0	0.0540346	0.0192049	0.0309502	0.0235183	0.0410256	0.0304136	0	0	0	0	0	0	0.0481464	0	0	0	0	0	0	0.0380518	0	0.101215	0	0	0.0609013	0	0	0	0	0.026976	0	0	0	0.0108495	0	0	0
Cofactors, Vitamins, Prosthetic Groups, Pigments	Tetrapyrroles	Heme and Siroheme Biosynthesis	Ferrochelatase, protoheme ferro-lyase (EC 4.99.1.1)	0.0195542	0.0169509	0.810444	0.810444	0	0.0956938	0.0997009	0	0	0	0.0384098	0.0309502	0.0235183	0.0615385	0.0608273	0	0	0	0	0	0	0	0	0	0	0	0.0167701	0.0662691	0	0	0	0	0	0	0.0819001	0	0	0	0.026976	0	0	0	0.0108495	0.171527	0.0494805	0
Cofactors, Vitamins, Prosthetic Groups, Pigments	Folate and pterines	YgfZ	Iron-sulfur cluster assembly ATPase protein SufC - #1	0.00679102	0.00569209	0.825492	0.825492	0	0	0	0	0	0.0180115	0.0192049	0.0309502	0.0235183	0.0205128	0.0304136	0	0	0	0	0	0	0	0	0	0	0	0.0167701	0	0	0	0	0	0.097371	0	0	0	0	0	0	0	0	0	0	0	0	0.0281611
Cofactors, Vitamins, Prosthetic Groups, Pigments	Folate and pterines	Folate Biosynthesis	Folylpolyglutamate synthase (EC 6.3.2.17)	0.0262448	0.0287975	0.835967	0.835967	0	0.0956938	0.0997009	0	0	0.0540346	0.0384098	0.0309502	0.14111	0	0.0912409	0	0	0	0	0	0	0	0	0	0	0	0.0503102	0.0331345	0.0570776	0.0322061	0	0	0	0.0406009	0	0.0551876	0	0	0.026976	0	0.0625391	0	0.021699	0.171527	0.0494805	0.0844832
Cofactors, Vitamins, Prosthetic Groups, Pigments	Folate and pterines	Folate Biosynthesis	Dihydrofolate synthase (EC 6.3.2.12)	0.0262448	0.0287975	0.835967	0.835967	0	0.0956938	0.0997009	0	0	0.0540346	0.0384098	0.0309502	0.14111	0	0.0912409	0	0	0	0	0	0	0	0	0	0	0	0.0503102	0.0331345	0.0570776	0.0322061	0	0	0	0.0406009	0	0.0551876	0	0	0.026976	0	0.0625391	0	0.021699	0.171527	0.0494805	0.0844832
Cofactors, Vitamins, Prosthetic Groups, Pigments	Quinone cofactors	Menaquinone and Phylloquinone Biosynthesis	2-succinyl-5-enolpyruvyl-6-hydroxy-3-cyclohexene-1-carboxylic-acid synthase (EC 2.2.1.9)	0.008827	0.0103955	0.847012	0.847012	0	0	0	0	0	0	0.0384098	0.0619003	0.0235183	0.0615385	0	0	0	0	0	0	0	0	0	0	0	0	0.0335402	0.132538	0	0	0	0	0	0	0	0	0	0	0	0	0.0938086	0	0	0	0	0
Cofactors, Vitamins, Prosthetic Groups, Pigments	Biotin	Biotin biosynthesis	8-amino-7-oxononanoate synthase (EC 2.3.1.47)	0.0221099	0.0249345	0.856453	0.856453	0	0	0	0	0	0	0	0	0	0	0	0	0.285442	0	0	0.130719	0	0.0481464	0	0	0	0.106326	0.0670803	0	0.0761035	0	0	0	0	0.101502	0	0.0551876	0	0.0742942	0.026976	0	0.0312695	0	0.0325486	0	0	0
Cofactors, Vitamins, Prosthetic Groups, Pigments	Tetrapyrroles	Heme and Siroheme Biosynthesis	Sirohydrochlorin ferrochelatase (EC 4.99.1.4)	0.00550763	0.00645412	0.886757	0.886757	0	0	0	0	0	0	0	0	0	0.0205128	0	0	0.0951475	0	0	0	0	0	0	0	0	0	0	0	0.0570776	0	0	0.104275	0	0	0	0	0	0	0	0	0	0	0	0	0	0
Cofactors, Vitamins, Prosthetic Groups, Pigments	Tetrapyrroles	Heme and Siroheme Biosynthesis	Precorrin-2 oxidase (EC 1.3.1.76)	0.00550763	0.00645412	0.886757	0.886757	0	0	0	0	0	0	0	0	0	0.0205128	0	0	0.0951475	0	0	0	0	0	0	0	0	0	0	0	0.0570776	0	0	0.104275	0	0	0	0	0	0	0	0	0	0	0	0	0	0
Cofactors, Vitamins, Prosthetic Groups, Pigments	Folate and pterines	YgfZ	Cystathionine gamma-synthase (EC 2.5.1.48) - #1	0.00705813	0.006228	0.887356	0.887356	0	0	0	0	0	0.0540346	0.0192049	0.0309502	0.0235183	0.0205128	0	0	0	0	0	0	0	0	0	0	0	0	0	0	0	0.0322061	0	0	0	0	0	0	0	0	0	0	0	0	0.0108495	0	0	0.112644
Cofactors, Vitamins, Prosthetic Groups, Pigments	Folate and pterines	YgfZ	Cysteine desulfurase CsdA-CsdE (EC 2.8.1.7), main protein CsdA - #2	0.00233151	0.00197922	0.894729	0.894729	0	0	0	0	0	0.0180115	0	0.0309502	0	0	0	0	0	0	0	0	0	0	0	0	0	0	0	0	0	0	0	0	0	0	0	0	0	0	0	0	0	0	0	0	0.0494805	0
Cofactors, Vitamins, Prosthetic Groups, Pigments	Folate and pterines	5-FCL-like protein	Dihydrofolate reductase (EC 1.5.1.3) - #1	0.0216057	0.0197886	0.905211	0.905211	0	0.0956938	0.299103	0	0	0	0.0384098	0	0	0.0205128	0	0	0	0	0	0	0	0	0	0	0	0.0265816	0	0.0662691	0.0761035	0	0	0	0	0.0203004	0	0.110375	0	0.0742942	0.053952	0	0	0	0	0	0.0494805	0
Cofactors, Vitamins, Prosthetic Groups, Pigments	Folate and pterines	Folate Biosynthesis	Dihydrofolate reductase (EC 1.5.1.3) - #2	0.0216057	0.0197886	0.905211	0.905211	0	0.0956938	0.299103	0	0	0	0.0384098	0	0	0.0205128	0	0	0	0	0	0	0	0	0	0	0	0.0265816	0	0.0662691	0.0761035	0	0	0	0	0.0203004	0	0.110375	0	0.0742942	0.053952	0	0	0	0	0	0.0494805	0
Cofactors, Vitamins, Prosthetic Groups, Pigments	NAD and NADP	NAD and NADP cofactor biosynthesis global	Transcriptional repressor for NAD biosynthesis in gram-positives	0.0019536	0.00168476	0.906975	0.906975	0	0	0	0	0	0	0	0	0	0.0410256	0	0	0	0	0	0	0	0	0	0	0	0	0	0	0	0	0	0	0	0	0	0	0	0	0	0	0.0312695	0	0.0108495	0	0	0
Cofactors, Vitamins, Prosthetic Groups, Pigments	NAD and NADP	NAD regulation	Transcriptional repressor for NAD biosynthesis in gram-positives - #1	0.0019536	0.00168476	0.906975	0.906975	0	0	0	0	0	0	0	0	0	0.0410256	0	0	0	0	0	0	0	0	0	0	0	0	0	0	0	0	0	0	0	0	0	0	0	0	0	0	0.0312695	0	0.0108495	0	0	0
Cofactors, Vitamins, Prosthetic Groups, Pigments	Folate and pterines	Pterin biosynthesis	Pterin-4-alpha-carbinolamine dehydratase (EC 4.2.1.96)	0.00229268	0.00258761	0.913916	0.913916	0	0	0	0	0	0	0	0	0	0	0	0	0	0	0	0	0	0.0481464	0	0	0	0	0.0335402	0	0	0	0	0	0	0.0203004	0	0	0	0	0	0	0	0	0.0108495	0	0	0
Cofactors, Vitamins, Prosthetic Groups, Pigments	Folate and pterines	Pterin metabolism 3	Pterin-4-alpha-carbinolamine dehydratase (EC 4.2.1.96) - #3	0.00229268	0.00258761	0.913916	0.913916	0	0	0	0	0	0	0	0	0	0	0	0	0	0	0	0	0	0.0481464	0	0	0	0	0.0335402	0	0	0	0	0	0	0.0203004	0	0	0	0	0	0	0	0	0.0108495	0	0	0
Cofactors, Vitamins, Prosthetic Groups, Pigments	Folate and pterines	Pterin carbinolamine dehydratase	Pterin-4-alpha-carbinolamine dehydratase (EC 4.2.1.96) - #1	0.00229268	0.00258761	0.913916	0.913916	0	0	0	0	0	0	0	0	0	0	0	0	0	0	0	0	0	0.0481464	0	0	0	0	0.0335402	0	0	0	0	0	0	0.0203004	0	0	0	0	0	0	0	0	0.0108495	0	0	0
Cofactors, Vitamins, Prosthetic Groups, Pigments	Tetrapyrroles	Heme and Siroheme Biosynthesis	Radical SAM family enzyme, similar to coproporphyrinogen III oxidase, oxygen-independent, clustered with nucleoside-triphosphatase RdgB - #1	0.00171538	0.00150634	0.914739	0.914739	0	0	0	0	0	0.0360231	0	0	0	0	0	0	0	0	0	0	0	0	0	0	0	0	0	0	0	0	0	0	0	0.0203004	0	0	0	0	0	0	0	0	0	0	0	0
Cofactors, Vitamins, Prosthetic Groups, Pigments	Folate and pterines	Pterin metabolism	COGs COG3146	0.00622471	0.00572773	0.936142	0.936142	0	0	0	0	0	0	0	0	0	0	0	0	0	0	0	0.130719	0	0	0	0	0	0	0.0335402	0	0.0190259	0	0	0	0	0.0203004	0	0	0	0	0	0	0.0312695	0	0.021699	0	0	0
Cofactors, Vitamins, Prosthetic Groups, Pigments	Folate and pterines	Pterin metabolism 3	COGs COG3146 - #1	0.00622471	0.00572773	0.936142	0.936142	0	0	0	0	0	0	0	0	0	0	0	0	0	0	0	0.130719	0	0	0	0	0	0	0.0335402	0	0.0190259	0	0	0	0	0.0203004	0	0	0	0	0	0	0.0312695	0	0.021699	0	0	0
Cofactors, Vitamins, Prosthetic Groups, Pigments	Coenzyme A	Coenzyme A Biosynthesis	Pantothenate:Na+ symporter (TC 2.A.21.1.1)	0.00342742	0.00312256	0.940366	0.940366	0	0	0	0	0	0	0	0.0309502	0	0.0410256	0	0	0	0	0	0	0	0	0	0	0	0	0	0	0	0	0	0	0	0	0	0	0	0	0	0	0	0	0	0	0	0
Cofactors, Vitamins, Prosthetic Groups, Pigments	Coenzyme A	Coenzyme A Biosynthesis	Phosphopantetheine adenylyltransferase (EC 2.7.7.3) - #1	0.00538852	0.00576591	0.943941	0.943941	0	0	0	0	0	0.0180115	0	0	0	0	0	0	0.0951475	0	0	0	0	0	0	0	0	0	0	0	0.0190259	0.0644122	0	0	0	0	0	0	0	0	0	0	0	0	0.0325486	0	0	0.0281611
Cofactors, Vitamins, Prosthetic Groups, Pigments	Quinone cofactors	Menaquinone and Phylloquinone Biosynthesis	O-succinylbenzoic acid--CoA ligase (EC 6.2.1.26)	0.00519809	0.00487518	0.945085	0.945085	0	0	0	0	0	0.0360231	0.0192049	0	0.0235183	0	0.0304136	0	0	0	0	0	0	0	0	0	0	0	0.0335402	0	0	0	0	0	0	0	0	0	0	0	0	0	0	0	0	0	0	0
Cofactors, Vitamins, Prosthetic Groups, Pigments	Tetrapyrroles	Heme and Siroheme Biosynthesis	Glutamyl-tRNA synthetase (EC 6.1.1.17)	0.0338048	0.0347217	0.949664	0.949664	0	0.0956938	0.0997009	0	0	0	0.115229	0.0928505	0.070555	0.0615385	0.0608273	0	0	0	0	0.0653595	0	0.0481464	0	0	0	0	0.0670803	0	0.0570776	0	0	0.104275	0	0.0203004	0	0.110375	0	0	0.026976	0	0.0625391	0	0.021699	0	0	0.168966
Cofactors, Vitamins, Prosthetic Groups, Pigments	NAD and NADP	NAD regulation	Nudix-related transcriptional regulator NrtR - #1	0.0126441	0.0133361	0.958971	0.958971	0	0.0956938	0.0997009	0	0	0	0.0192049	0	0	0.0205128	0.0304136	0	0	0	0	0	0	0	0	0	0	0	0	0	0	0	0	0	0	0	0	0	0	0	0	0	0.0312695	0.273973	0	0	0	0.0281611
Cofactors, Vitamins, Prosthetic Groups, Pigments	NAD and NADP	NAD and NADP cofactor biosynthesis global	Nudix-related transcriptional regulator NrtR	0.0126441	0.0133361	0.958971	0.958971	0	0.0956938	0.0997009	0	0	0	0.0192049	0	0	0.0205128	0.0304136	0	0	0	0	0	0	0	0	0	0	0	0	0	0	0	0	0	0	0	0	0	0	0	0	0	0.0312695	0.273973	0	0	0	0.0281611
Cofactors, Vitamins, Prosthetic Groups, Pigments	Folate and pterines	Folate Biosynthesis	GTP cyclohydrolase I (EC 3.5.4.16) type 2	0.00229268	0.00219157	0.968295	0.968295	0	0	0	0	0	0	0	0	0	0	0	0	0	0	0	0	0	0.0481464	0	0	0	0.0265816	0	0	0	0	0	0	0	0	0	0	0	0	0	0	0	0	0.0108495	0	0	0
Cofactors, Vitamins, Prosthetic Groups, Pigments	Folate and pterines	Pterin metabolism 3	Dihydroneopterin aldolase (EC 4.1.2.25) - #3	0.00894457	0.0088613	0.99193	0.99193	0	0	0	0	0	0	0.0384098	0.0309502	0.0470367	0.0410256	0.0304136	0	0	0	0	0	0	0	0	0	0	0	0.0335402	0	0.0190259	0	0	0	0	0	0	0	0	0	0	0	0	0	0	0	0	0.168966
Cofactors, Vitamins, Prosthetic Groups, Pigments	Folate and pterines	Methanopterin biosynthesis2	Dihydroneopterin aldolase (EC 4.1.2.25) - #2	0.00894457	0.0088613	0.99193	0.99193	0	0	0	0	0	0	0.0384098	0.0309502	0.0470367	0.0410256	0.0304136	0	0	0	0	0	0	0	0	0	0	0	0.0335402	0	0.0190259	0	0	0	0	0	0	0	0	0	0	0	0	0	0	0	0	0.168966
Cofactors, Vitamins, Prosthetic Groups, Pigments	Folate and pterines	Folate Biosynthesis	Dihydroneopterin aldolase (EC 4.1.2.25) - #1	0.00894457	0.0088613	0.99193	0.99193	0	0	0	0	0	0	0.0384098	0.0309502	0.0470367	0.0410256	0.0304136	0	0	0	0	0	0	0	0	0	0	0	0.0335402	0	0.0190259	0	0	0	0	0	0	0	0	0	0	0	0	0	0	0	0	0.168966
Fatty Acids, Lipids, and Isoprenoids	Fatty acids	Fatty Acid Biosynthesis FASII	3-oxoacyl-[acyl-carrier protein] reductase (EC 1.1.1.100) - #3	0.0262247	0.130986	0.000232425	0.000232425	0	0	0.0997009	0	0	0.0360231	0.0768197	0	0.0470367	0.0205128	0.0608273	0	0	0	0	0.0653595	0	0.144439	0	0	0	0.0797448	0.0670803	0.0331345	0.0951294	0.0966184	0	0.208551	0.292113	0.142103	0.1638	0.275938	0	0.0742942	0.161856	0.21322	0.125078	0	0.0759466	0.343053	0.395844	0.0844832
Fatty Acids, Lipids, and Isoprenoids	Fatty acids	Phospholipid and Fatty acid biosynthesis related cluster	FIG138576: 3-oxoacyl-[ACP] synthase (EC 2.3.1.41)	0	0.0253901	0.000912942	0.000912942	0	0	0	0	0	0	0	0	0	0	0	0	0	0	0	0	0	0	0	0	0	0.0531632	0.0167701	0.0331345	0.0380518	0.0322061	0.101215	0	0	0.0203004	0.0819001	0	0	0	0.026976	0	0	0	0.021699	0	0	0
Fatty Acids, Lipids, and Isoprenoids	Fatty acids	Phospholipid and Fatty acid biosynthesis related cluster	3-oxoacyl-[ACP] synthase	0.00540504	0.0447779	0.00140715	0.00140715	0	0	0	0	0	0	0	0	0	0	0	0	0	0	0	0.0653595	0	0.0481464	0	0	0	0.0531632	0.0335402	0.0331345	0.0570776	0.0322061	0.101215	0	0	0.0406009	0.1638	0	0	0	0.053952	0	0	0	0.0433981	0	0.0989609	0
Fatty Acids, Lipids, and Isoprenoids	Fatty Acids, Lipids, and Isoprenoids	Polyhydroxybutyrate metabolism	Poly(3-hydroxyalkanoate) depolymerase	0	0.0164825	0.00597702	0.00597702	0	0	0	0	0	0	0	0	0	0	0	0	0	0	0	0	0	0	0	0	0	0	0.0167701	0	0	0	0	0	0	0.0812018	0	0.0551876	0	0.0742942	0.053952	0	0.0312695	0	0.0325486	0	0.0494805	0
Fatty Acids, Lipids, and Isoprenoids	Fatty acids	Fatty Acid Biosynthesis FASII	Transcriptional regulator of fatty acid biosynthesis FabT	0.0160955	0	0.00862351	0.00862351	0	0.0956938	0.0997009	0	0	0.0180115	0.0192049	0.0309502	0.0235183	0.0205128	0.0304136	0	0	0	0	0	0	0	0	0	0	0	0	0	0	0	0	0	0	0	0	0	0	0	0	0	0	0	0	0	0	0
Fatty Acids, Lipids, and Isoprenoids	Isoprenoids	Isoprenoid Biosynthesis	4-hydroxy-3-methylbut-2-enyl diphosphate reductase (EC 1.17.1.2)	0.00673908	0.0413143	0.0208821	0.0208821	0	0	0	0	0	0.0900576	0	0.0309502	0	0.0205128	0	0	0	0	0	0	0	0	0	0	0	0.0797448	0	0.0331345	0.0951294	0.0644122	0	0.104275	0.194742	0	0	0	0	0	0	0	0	0	0.0325486	0	0	0.0563222
Fatty Acids, Lipids, and Isoprenoids	Fatty acids	Phospholipid and Fatty acid biosynthesis related cluster	Lysophospholipid acyltransferase	0	0.0252956	0.0213731	0.0213731	0	0	0	0	0	0	0	0	0	0	0	0	0	0	0	0	0	0	0	0	0	0.0265816	0.0335402	0.0331345	0.0380518	0	0.101215	0	0.097371	0.0406009	0	0	0	0	0.026976	0.21322	0	0	0.021699	0	0	0
Fatty Acids, Lipids, and Isoprenoids	Fatty Acids, Lipids, and Isoprenoids	Polyhydroxybutyrate metabolism	D(-)-3-hydroxybutyrate oligomer hydrolase (EC 3.1.1.22)	0	0.0108353	0.023353	0.023353	0	0	0	0	0	0	0	0	0	0	0	0	0	0	0	0	0	0	0	0	0	0	0.0335402	0	0	0	0	0	0	0.0406009	0	0	0	0.0742942	0.026976	0	0	0	0.0433981	0	0	0
Fatty Acids, Lipids, and Isoprenoids	Isoprenoids	Polyprenyl Diphosphate Biosynthesis	Heptaprenyl diphosphate synthase component I (EC 2.5.1.30)	0.00445951	0	0.024843	0.024843	0	0	0	0	0	0	0.0192049	0	0.0235183	0.0205128	0.0304136	0	0	0	0	0	0	0	0	0	0	0	0	0	0	0	0	0	0	0	0	0	0	0	0	0	0	0	0	0	0	0
Fatty Acids, Lipids, and Isoprenoids	Fatty acids	Fatty acid degradation regulons	Transcriptional regulator for fatty acid degradation FadR, GntR family	0.0043404	0	0.0257498	0.0257498	0	0	0	0	0	0.0180115	0.0192049	0	0.0235183	0	0.0304136	0	0	0	0	0	0	0	0	0	0	0	0	0	0	0	0	0	0	0	0	0	0	0	0	0	0	0	0	0	0	0
Fatty Acids, Lipids, and Isoprenoids	Fatty acids	Fatty Acid Biosynthesis FASII	4'-phosphopantetheinyl transferase (EC 2.7.8.-)	0.00419728	0	0.0261087	0.0261087	0	0	0	0	0	0.0180115	0.0192049	0	0	0.0205128	0.0304136	0	0	0	0	0	0	0	0	0	0	0	0	0	0	0	0	0	0	0	0	0	0	0	0	0	0	0	0	0	0	0
Fatty Acids, Lipids, and Isoprenoids	Isoprenoids	Acyclic terpenes utilization	3-hydroxy-3isohexenylglutaryl-CoA:acetate lyase	0	0.0108092	0.0291173	0.0291173	0	0	0	0	0	0	0	0	0	0	0	0	0	0	0	0	0	0	0	0	0	0	0.0167701	0	0	0	0	0	0	0.0203004	0.0819001	0.0551876	0	0	0.053952	0	0.0312695	0	0.0108495	0	0	0
Fatty Acids, Lipids, and Isoprenoids	Fatty acids	Phospholipid and Fatty acid biosynthesis related cluster	FIG021862: membrane protein, exporter	0.00229268	0.031614	0.0324392	0.0324392	0	0	0	0	0	0	0	0	0	0	0	0	0	0	0	0	0	0.0481464	0	0	0	0	0.0167701	0	0	0	0	0	0	0.0406009	0	0.110375	0	0.0742942	0.053952	0	0	0.273973	0.0325486	0	0.0494805	0
Fatty Acids, Lipids, and Isoprenoids	Fatty acids	Fatty acid degradation regulons	2,4-dienoyl-CoA reductase [NADPH] (EC 1.3.1.34)	0.0227781	0.0643177	0.042785	0.042785	0	0	0	0	0	0.0180115	0	0	0.0235183	0	0	0	0	0	0	0.196078	0	0.240732	0	0	0	0.0265816	0.0670803	0.0331345	0.0570776	0	0	0	0	0.0812018	0.2457	0.0551876	0	0.148588	0.080928	0.21322	0.0625391	0	0.0650971	0.171527	0.0989609	0
Fatty Acids, Lipids, and Isoprenoids	Fatty acids	Fatty Acid Biosynthesis FASII	Enoyl-[acyl-carrier-protein] reductase [FMN] (EC 1.3.1.9)	0.0276242	0.0584189	0.0438939	0.0438939	0	0.0956938	0.0997009	0	0	0.0180115	0.0384098	0.0309502	0.0470367	0.0410256	0.0304136	0	0	0	0	0.130719	0	0.0481464	0	0	0	0.0265816	0.0335402	0.0662691	0.0570776	0.0322061	0	0.104275	0	0.0406009	0.1638	0.110375	0	0.0742942	0.080928	0.21322	0.0938086	0	0.0542476	0	0.0494805	0
Fatty Acids, Lipids, and Isoprenoids	Isoprenoids	Isoprenoid Biosynthesis	Isopentenyl-diphosphate delta-isomerase, FMN-dependent (EC 5.3.3.2) - #1	0.0103265	0.000433981	0.0581224	0.0581224	0	0	0.0997009	0	0	0.0360231	0.0576147	0	0.0235183	0	0	0	0	0	0	0	0	0	0	0	0	0	0	0	0	0	0	0	0	0	0	0	0	0	0	0	0	0	0.0108495	0	0	0
Fatty Acids, Lipids, and Isoprenoids	Isoprenoids	Archaeal lipids	Isopentenyl-diphosphate delta-isomerase, FMN-dependent (EC 5.3.3.2)	0.0103265	0.000433981	0.0581224	0.0581224	0	0	0.0997009	0	0	0.0360231	0.0576147	0	0.0235183	0	0	0	0	0	0	0	0	0	0	0	0	0	0	0	0	0	0	0	0	0	0	0	0	0	0	0	0	0	0.0108495	0	0	0
Fatty Acids, Lipids, and Isoprenoids	Fatty acids	Fatty Acid Biosynthesis FASII	Acetyl-coenzyme A carboxyl transferase beta chain (EC 6.4.1.2)	0.0155219	0.0353048	0.0621445	0.0621445	0	0	0	0	0	0.0540346	0.0192049	0	0.070555	0.0205128	0	0	0	0	0	0.0653595	0	0.0962927	0	0	0	0.0265816	0.0503102	0.0662691	0.0570776	0	0	0	0	0.0203004	0.0819001	0	0	0.0742942	0.080928	0	0.0312695	0	0.021699	0	0.0494805	0.140805
Fatty Acids, Lipids, and Isoprenoids	Fatty acids	Fatty Acid Biosynthesis FASII	Enoyl-[acyl-carrier-protein] reductase [NADPH] (EC 1.3.1.10)	0.00229268	0.010529	0.0792348	0.0792348	0	0	0	0	0	0	0	0	0	0	0	0	0	0	0	0	0	0.0481464	0	0	0	0	0.0167701	0	0.0190259	0	0	0	0	0.0406009	0	0.0551876	0	0	0.053952	0	0	0	0.0108495	0	0.0494805	0
Fatty Acids, Lipids, and Isoprenoids	Fatty acids	Carnitine Metabolism in Microorganisms	Crotonobetainyl-CoA:carnitine CoA-transferase (EC 2.8.3.-)	0.00777686	0	0.0796477	0.0796477	0	0	0	0	0	0.0180115	0.0192049	0.0309502	0	0	0	0	0.0951475	0	0	0	0	0	0	0	0	0	0	0	0	0	0	0	0	0	0	0	0	0	0	0	0	0	0	0	0	0
Fatty Acids, Lipids, and Isoprenoids	Isoprenoids	Acyclic terpenes utilization	Citronellol and citronellal dehydrogenase	0	0.00383138	0.0884283	0.0884283	0	0	0	0	0	0	0	0	0	0	0	0	0	0	0	0	0	0	0	0	0	0	0	0	0	0	0	0	0	0.0406009	0	0	0	0	0.026976	0	0	0	0.0108495	0	0	0
Fatty Acids, Lipids, and Isoprenoids	Phospholipids	Glycerolipid and Glycerophospholipid Metabolism in Bacteria	Phosphatidylserine decarboxylase (EC 4.1.1.65)	0.0133308	0.0360716	0.100653	0.100653	0	0	0	0	0	0	0.0192049	0.0309502	0	0.0205128	0.0304136	0	0	0	0	0.130719	0	0.0481464	0	0	0	0	0.10062	0.0331345	0.0380518	0.0322061	0	0.208551	0.097371	0.0406009	0	0	0	0	0.053952	0	0.0312695	0	0.0108495	0	0.0989609	0
Fatty Acids, Lipids, and Isoprenoids	Fatty acids	Fatty Acid Biosynthesis FASII	3-oxoacyl-[acyl-carrier-protein] synthase, KASII (EC 2.3.1.41) - #2	0.0296625	0.0557091	0.10252	0.10252	0	0.191388	0.0997009	0	0	0.0720461	0.0960246	0.0619003	0	0.0410256	0.0608273	0	0	0	0	0	0	0	0	0	0	0.0265816	0.0670803	0.0662691	0.0951294	0.161031	0	0.104275	0.097371	0.0609013	0	0.0551876	0	0	0.080928	0.21322	0.0625391	0	0.0433981	0	0.0494805	0
Fatty Acids, Lipids, and Isoprenoids	Fatty acids	Fatty acid degradation regulons	Predicted transcriptional regulator for fatty acid degradation FadQ, TetR family	0	0.00194032	0.11639	0.11639	0	0	0	0	0	0	0	0	0	0	0	0	0	0	0	0	0	0	0	0	0	0	0	0	0	0	0	0	0	0.0203004	0	0	0	0	0	0	0	0	0.0108495	0	0	0
Fatty Acids, Lipids, and Isoprenoids	Fatty acids	Carnitine Metabolism in Microorganisms	Electron transfer flavoprotein, beta subunit FixA	0.00691917	0	0.116437	0.116437	0	0	0	0	0	0	0.0192049	0.0309502	0	0	0	0	0.0951475	0	0	0	0	0	0	0	0	0	0	0	0	0	0	0	0	0	0	0	0	0	0	0	0	0	0	0	0	0
Fatty Acids, Lipids, and Isoprenoids	Fatty acids	Carnitine Metabolism in Microorganisms	Crotonobetainyl-CoA dehydrogenase (EC 1.3.99.-)	0.00691917	0	0.116437	0.116437	0	0	0	0	0	0	0.0192049	0.0309502	0	0	0	0	0.0951475	0	0	0	0	0	0	0	0	0	0	0	0	0	0	0	0	0	0	0	0	0	0	0	0	0	0	0	0	0
Fatty Acids, Lipids, and Isoprenoids	Fatty acids	Carnitine Metabolism in Microorganisms	Crotonobetaine carnitine-CoA ligase (EC 6.3.2.-)	0.0031892	0	0.120915	0.120915	0	0	0	0	0	0.0360231	0	0.0309502	0	0	0	0	0	0	0	0	0	0	0	0	0	0	0	0	0	0	0	0	0	0	0	0	0	0	0	0	0	0	0	0	0	0
Fatty Acids, Lipids, and Isoprenoids	Fatty acids	Fatty Acid Biosynthesis FASII	Acyl carrier protein phosphodiesterase (EC 3.1.4.14)	0.00330286	0	0.122072	0.122072	0	0	0	0	0	0	0.0384098	0.0309502	0	0	0	0	0	0	0	0	0	0	0	0	0	0	0	0	0	0	0	0	0	0	0	0	0	0	0	0	0	0	0	0	0	0
Fatty Acids, Lipids, and Isoprenoids	Fatty acids	Phospholipid and Fatty acid biosynthesis related cluster	3-oxoacyl-[ACP] synthase (EC 2.3.1.41) FabV like	0.00540504	0.0163295	0.126742	0.126742	0	0	0	0	0	0	0	0	0	0	0	0	0	0	0	0.0653595	0	0.0481464	0	0	0	0	0.0167701	0	0.0190259	0	0	0	0	0.0203004	0.0819001	0	0	0	0	0	0	0	0.021699	0	0.0494805	0
Fatty Acids, Lipids, and Isoprenoids	Fatty acids	Phospholipid and Fatty acid biosynthesis related cluster	Acyl carrier protein (ACP1)	0	0.00232504	0.127062	0.127062	0	0	0	0	0	0	0	0	0	0	0	0	0	0	0	0	0	0	0	0	0	0	0	0	0	0	0	0	0	0.0203004	0	0	0	0	0.026976	0	0	0	0.0108495	0	0	0
Fatty Acids, Lipids, and Isoprenoids	Isoprenoids	Polyprenyl Diphosphate Biosynthesis	Geranylgeranyl reductase (EC 1.3.1.83)	0	0.00570553	0.158929	0.158929	0	0	0	0	0	0	0	0	0	0	0	0	0	0	0	0	0	0	0	0	0	0.0265816	0.0838504	0	0	0.0322061	0	0	0	0	0	0	0	0	0	0	0	0	0	0	0	0
Fatty Acids, Lipids, and Isoprenoids	Fatty Acids, Lipids, and Isoprenoids	Polyhydroxybutyrate metabolism	Polyhydroxyalkanoic acid synthase	0.00229268	0.0122731	0.170379	0.170379	0	0	0	0	0	0	0	0	0	0	0	0	0	0	0	0	0	0.0481464	0	0	0	0	0.0167701	0	0	0	0	0	0	0.0203004	0	0	0	0.148588	0.026976	0	0.0312695	0	0.0108495	0	0	0
Fatty Acids, Lipids, and Isoprenoids	Fatty acids	Carnitine Metabolism in Microorganisms	L-carnitine/gamma-butyrobetaine antiporter	0.01145	0	0.17587	0.17587	0	0	0	0	0	0	0.0192049	0.0309502	0	0	0	0	0.190295	0	0	0	0	0	0	0	0	0	0	0	0	0	0	0	0	0	0	0	0	0	0	0	0	0	0	0	0	0
Fatty Acids, Lipids, and Isoprenoids	Isoprenoids	Polyprenyl Diphosphate Biosynthesis	Heptaprenyl diphosphate synthase component II (EC 2.5.1.30)	0.0232774	0.00915995	0.186161	0.186161	0	0.191388	0.0997009	0	0	0	0.0384098	0.0309502	0.0470367	0.0205128	0.0608273	0	0	0	0	0	0	0	0	0	0	0	0.0167701	0	0	0.0644122	0	0	0	0	0	0	0	0	0	0	0.0312695	0	0.0108495	0	0	0
Fatty Acids, Lipids, and Isoprenoids	Fatty Acids, Lipids, and Isoprenoids	Polyhydroxybutyrate metabolism	Intracellular PHB depolymerase (EC 3.1.1.-)	0	0.00150634	0.19457	0.19457	0	0	0	0	0	0	0	0	0	0	0	0	0	0	0	0	0	0	0	0	0	0	0	0	0	0	0	0	0	0.0203004	0	0	0	0	0	0	0	0	0	0	0	0
Fatty Acids, Lipids, and Isoprenoids	Fatty acids	Fatty Acid Biosynthesis FASII	Acetyl-coenzyme A carboxyl transferase alpha chain (EC 6.4.1.2)	0.00519963	0.0163884	0.196397	0.196397	0	0	0	0	0	0.0180115	0.0192049	0.0309502	0	0.0410256	0	0	0	0	0	0	0	0	0	0	0	0	0	0	0.0570776	0	0.101215	0	0	0	0	0	0	0	0	0	0	0	0.0325486	0	0	0.140805
Fatty Acids, Lipids, and Isoprenoids	Fatty acids	Fatty Acid Biosynthesis FASI	3-hydroxypalmitoyl-[acyl-carrier-protein] dehydratase of FASI (EC 4.2.1.61)	0	0.0290219	0.199942	0.199942	0	0	0	0	0	0	0	0	0	0	0	0	0	0	0	0	0	0	0	0	0	0.0265816	0	0	0	0	0	0	0	0	0	0	0	0	0	0	0	0	0.0542476	0	0.0494805	0.506899
Fatty Acids, Lipids, and Isoprenoids	Fatty acids	Fatty Acid Biosynthesis FASI	Acyl carrier protein of FASI	0	0.0290219	0.199942	0.199942	0	0	0	0	0	0	0	0	0	0	0	0	0	0	0	0	0	0	0	0	0	0.0265816	0	0	0	0	0	0	0	0	0	0	0	0	0	0	0	0	0.0542476	0	0.0494805	0.506899
Fatty Acids, Lipids, and Isoprenoids	Fatty acids	Fatty Acid Biosynthesis FASI	[Acyl-carrier-protein] malonyl transferase of FASI (EC 2.3.1.39)	0	0.0290219	0.199942	0.199942	0	0	0	0	0	0	0	0	0	0	0	0	0	0	0	0	0	0	0	0	0	0.0265816	0	0	0	0	0	0	0	0	0	0	0	0	0	0	0	0	0.0542476	0	0.0494805	0.506899
Fatty Acids, Lipids, and Isoprenoids	Fatty acids	Fatty Acid Biosynthesis FASI	3-oxoacyl-[acyl-carrier-protein] reductase of FASI (EC 1.1.1.100)	0	0.0290219	0.199942	0.199942	0	0	0	0	0	0	0	0	0	0	0	0	0	0	0	0	0	0	0	0	0	0.0265816	0	0	0	0	0	0	0	0	0	0	0	0	0	0	0	0	0.0542476	0	0.0494805	0.506899
Fatty Acids, Lipids, and Isoprenoids	Fatty acids	Fatty Acid Biosynthesis FASI	Enoyl-[acyl-carrier-protein] reductase of FASI (EC 1.3.1.9)	0	0.0290219	0.199942	0.199942	0	0	0	0	0	0	0	0	0	0	0	0	0	0	0	0	0	0	0	0	0	0.0265816	0	0	0	0	0	0	0	0	0	0	0	0	0	0	0	0	0.0542476	0	0.0494805	0.506899
Fatty Acids, Lipids, and Isoprenoids	Fatty acids	Fatty Acid Biosynthesis FASI	[Acyl-carrier-protein] acetyl transferase of FASI (EC 2.3.1.38)	0	0.0290219	0.199942	0.199942	0	0	0	0	0	0	0	0	0	0	0	0	0	0	0	0	0	0	0	0	0	0.0265816	0	0	0	0	0	0	0	0	0	0	0	0	0	0	0	0	0.0542476	0	0.0494805	0.506899
Fatty Acids, Lipids, and Isoprenoids	Fatty acids	Fatty Acid Biosynthesis FASI	[Acyl-carrier-protein] palmitoyl transferase of FASI (EC 2.3.1.-)	0	0.0290219	0.199942	0.199942	0	0	0	0	0	0	0	0	0	0	0	0	0	0	0	0	0	0	0	0	0	0.0265816	0	0	0	0	0	0	0	0	0	0	0	0	0	0	0	0	0.0542476	0	0.0494805	0.506899
Fatty Acids, Lipids, and Isoprenoids	Fatty acids	Fatty Acid Biosynthesis FASI	3-oxoacyl-[acyl-carrier-protein] synthase of FASI (EC 2.3.1.41)	0	0.0290219	0.199942	0.199942	0	0	0	0	0	0	0	0	0	0	0	0	0	0	0	0	0	0	0	0	0	0.0265816	0	0	0	0	0	0	0	0	0	0	0	0	0	0	0	0	0.0542476	0	0.0494805	0.506899
Fatty Acids, Lipids, and Isoprenoids	Fatty acids	Phospholipid and Fatty acid biosynthesis related cluster	3-oxoacyl-[ACP] reductase (EC 1.1.1.100)	0.00229268	0.00793624	0.203374	0.203374	0	0	0	0	0	0	0	0	0	0	0	0	0	0	0	0	0	0.0481464	0	0	0	0	0	0	0	0	0	0	0	0.0203004	0	0	0	0.0742942	0.026976	0	0.0312695	0	0.0108495	0	0	0
Fatty Acids, Lipids, and Isoprenoids	Phospholipids	Glycerolipid and Glycerophospholipid Metabolism in Bacteria	Anaerobic glycerol-3-phosphate dehydrogenase subunit C (EC 1.1.5.3)	0.0105355	0	0.212575	0.212575	0	0	0	0	0	0	0	0.0309502	0	0	0	0	0.190295	0	0	0	0	0	0	0	0	0	0	0	0	0	0	0	0	0	0	0	0	0	0	0	0	0	0	0	0	0
Fatty Acids, Lipids, and Isoprenoids	Fatty acids	Phospholipid and Fatty acid biosynthesis related cluster	FIG027190: Putative transmembrane protein	0	0.00328655	0.219977	0.219977	0	0	0	0	0	0	0	0	0	0	0	0	0	0	0	0	0	0	0	0	0	0	0	0	0	0	0	0	0	0	0	0.0551876	0	0	0.026976	0	0	0	0	0	0	0
Fatty Acids, Lipids, and Isoprenoids	Fatty acids	Fatty Acid Biosynthesis FASII	Biotin carboxyl carrier protein of acetyl-CoA carboxylase	0.00386893	0.0111894	0.233419	0.233419	0	0	0	0	0	0.0180115	0.0192049	0	0.0235183	0.0205128	0	0	0	0	0	0	0	0	0	0	0	0	0.0167701	0	0	0.0322061	0	0.104275	0	0.0203004	0	0	0	0	0	0	0	0	0.021699	0	0	0.0844832
Fatty Acids, Lipids, and Isoprenoids	Fatty acids	Fatty Acid Biosynthesis FASI	4'-phosphopantetheinyl transferase of FASI (EC 2.7.8.7)	0	0.00156042	0.236765	0.236765	0	0	0	0	0	0	0	0	0	0	0	0	0	0	0	0	0	0	0	0	0	0	0	0	0	0	0	0	0	0	0	0	0	0	0	0	0	0	0.0108495	0	0	0.0281611
Fatty Acids, Lipids, and Isoprenoids	Isoprenoids	Acyclic terpenes utilization	Geranyl-CoA carboxylase carboxyl transferase subunit	0.00229268	0.00709591	0.253704	0.253704	0	0	0	0	0	0	0	0	0	0	0	0	0	0	0	0	0	0.0481464	0	0	0	0	0.0167701	0	0	0	0	0	0	0.0203004	0	0	0	0.0742942	0.026976	0	0	0	0.021699	0	0	0
Fatty Acids, Lipids, and Isoprenoids	Fatty acids	Fatty acid degradation regulons	Predicted transcriptional regulator for fatty acid degradation FadP, TetR family	0.00229268	0.0068764	0.256602	0.256602	0	0	0	0	0	0	0	0	0	0	0	0	0	0	0	0	0	0.0481464	0	0	0	0	0.0335402	0.0331345	0	0	0	0	0	0.0609013	0	0	0	0	0.026976	0	0	0	0	0	0	0
Fatty Acids, Lipids, and Isoprenoids	Isoprenoids	Carotenoids	Carotenoid cis-trans isomerase (EC 5.2.-.-)	0.00111992	0	0.280143	0.280143	0	0	0	0	0	0	0	0	0.0235183	0	0	0	0	0	0	0	0	0	0	0	0	0	0	0	0	0	0	0	0	0	0	0	0	0	0	0	0	0	0	0	0	0
Fatty Acids, Lipids, and Isoprenoids	Fatty acids	Carnitine Metabolism in Microorganisms	Carnitine operon protein CaiE	0.0436872	0	0.280143	0.280143	0	0	0	0	0	0	0	0	0	0	0	0	0	0.917431	0	0	0	0	0	0	0	0	0	0	0	0	0	0	0	0	0	0	0	0	0	0	0	0	0	0	0	0
Fatty Acids, Lipids, and Isoprenoids	Fatty acids	Carnitine Metabolism in Microorganisms	Carnitinyl-CoA dehydratase (EC 4.2.1.-)	0.000857692	0	0.280143	0.280143	0	0	0	0	0	0.0180115	0	0	0	0	0	0	0	0	0	0	0	0	0	0	0	0	0	0	0	0	0	0	0	0	0	0	0	0	0	0	0	0	0	0	0	0
Fatty Acids, Lipids, and Isoprenoids	Fatty acids	Carnitine Metabolism in Microorganisms	Carnitine racemase (EC 5.-.-.-)	0.000857692	0	0.280143	0.280143	0	0	0	0	0	0.0180115	0	0	0	0	0	0	0	0	0	0	0	0	0	0	0	0	0	0	0	0	0	0	0	0	0	0	0	0	0	0	0	0	0	0	0	0
Fatty Acids, Lipids, and Isoprenoids	Fatty acids	Carnitine Metabolism in Microorganisms	Transcriptional activatory protein CaiF	0.00147382	0	0.280143	0.280143	0	0	0	0	0	0	0	0.0309502	0	0	0	0	0	0	0	0	0	0	0	0	0	0	0	0	0	0	0	0	0	0	0	0	0	0	0	0	0	0	0	0	0	0
Fatty Acids, Lipids, and Isoprenoids	Isoprenoids	Isoprenoid Biosynthesis	Isopentenyl-diphosphate delta-isomerase (EC 5.3.3.2) - #1	0.0239101	0.00269051	0.308396	0.308396	0	0	0	0	0	0	0	0	0	0	0.0304136	0	0	0	0	0	0	0	0	0	0.471698	0	0.0167701	0.0331345	0	0	0	0	0	0	0	0	0	0	0	0	0	0	0	0	0	0
Fatty Acids, Lipids, and Isoprenoids	Isoprenoids	Archaeal lipids	Isopentenyl-diphosphate delta-isomerase (EC 5.3.3.2)	0.0239101	0.00269051	0.308396	0.308396	0	0	0	0	0	0	0	0	0	0	0.0304136	0	0	0	0	0	0	0	0	0	0.471698	0	0.0167701	0.0331345	0	0	0	0	0	0	0	0	0	0	0	0	0	0	0	0	0	0
Fatty Acids, Lipids, and Isoprenoids	Fatty acids	Acyl-CoA thioesterase II	Acyl-CoA thioesterase II (EC 3.1.2.-)	0.0436872	0.00362155	0.321975	0.321975	0	0	0	0	0	0	0	0	0	0	0	0	0	0.917431	0	0	0	0	0	0	0	0.0265816	0.0167701	0	0.0190259	0	0	0	0	0	0	0	0	0	0	0	0	0	0	0	0	0.0281611
Fatty Acids, Lipids, and Isoprenoids	Triacylglycerols	Triacylglycerol metabolism	Phospholipase A1 precursor (EC 3.1.1.32, EC 3.1.1.4)	0.00269218	0.00695949	0.348837	0.348837	0	0	0	0	0	0.0360231	0	0	0	0.0205128	0	0	0	0	0	0	0	0	0	0	0	0	0.0167701	0	0	0	0	0	0	0.0406009	0.0819001	0	0	0	0	0	0	0	0	0	0	0
Fatty Acids, Lipids, and Isoprenoids	Fatty acids	Fatty acid degradation regulons	Fatty acid degradation regulator YsiA, TetR family	0	0.00132538	0.365255	0.365255	0	0	0	0	0	0	0	0	0	0	0	0	0	0	0	0	0	0	0	0	0	0	0	0.0331345	0	0	0	0	0	0	0	0	0	0	0	0	0	0	0	0	0	0
Fatty Acids, Lipids, and Isoprenoids	Fatty acids	Fatty Acid Biosynthesis FASI	Biotin carboxyl carrier protein of ACAC1	0	0.000694324	0.365255	0.365255	0	0	0	0	0	0	0	0	0	0	0	0	0	0	0	0	0	0	0	0	0	0	0	0	0	0	0	0	0	0	0	0	0	0	0	0	0	0	0	0	0	0
Fatty Acids, Lipids, and Isoprenoids	Isoprenoids	Carotenoids	Phytoene dehydrogenase (EC 1.14.99.-)	0	0.00106326	0.365255	0.365255	0	0	0	0	0	0	0	0	0	0	0	0	0	0	0	0	0	0	0	0	0	0.0265816	0	0	0	0	0	0	0	0	0	0	0	0	0	0	0	0	0	0	0	0
Fatty Acids, Lipids, and Isoprenoids	Isoprenoids	Acyclic terpenes utilization	Acyclic terpenes utilization regulator AtuR, TetR family	0	0.000694324	0.365255	0.365255	0	0	0	0	0	0	0	0	0	0	0	0	0	0	0	0	0	0	0	0	0	0	0	0	0	0	0	0	0	0	0	0	0	0	0	0	0	0	0	0	0	0
Fatty Acids, Lipids, and Isoprenoids	Isoprenoids	Carotenoids	Phytoene desaturase, pro-zeta-carotene producing (EC 1.-.-.-)	0	0.00128824	0.365255	0.365255	0	0	0	0	0	0	0	0	0	0	0	0	0	0	0	0	0	0	0	0	0	0	0	0	0	0.0322061	0	0	0	0	0	0	0	0	0	0	0	0	0	0	0	0
Fatty Acids, Lipids, and Isoprenoids	Isoprenoids	Acyclic terpenes utilization	Citronellyl-CoA dehydrogenase	0	0.00107904	0.365255	0.365255	0	0	0	0	0	0	0	0	0	0	0	0	0	0	0	0	0	0	0	0	0	0	0	0	0	0	0	0	0	0	0	0	0	0	0.026976	0	0	0	0	0	0	0
Fatty Acids, Lipids, and Isoprenoids	Fatty acids	Fatty Acid Biosynthesis FASI	3-oxoacyl-coenzyme A reductase of elongase (EC 1.1.1.62)	0	0.00106326	0.365255	0.365255	0	0	0	0	0	0	0	0	0	0	0	0	0	0	0	0	0	0	0	0	0	0.0265816	0	0	0	0	0	0	0	0	0	0	0	0	0	0	0	0	0	0	0	0
Fatty Acids, Lipids, and Isoprenoids	Isoprenoids	Dolichol metabolism	Dehydrodolichyl diphosphate synthase (EC 2.5.1.-)	0	0.00220751	0.365255	0.365255	0	0	0	0	0	0	0	0	0	0	0	0	0	0	0	0	0	0	0	0	0	0	0	0	0	0	0	0	0	0	0	0.0551876	0	0	0	0	0	0	0	0	0	0
Fatty Acids, Lipids, and Isoprenoids	Isoprenoids	Acyclic terpenes utilization	Geranyl-CoA carboxylase biotin-containing subunit	0	0.000433981	0.365255	0.365255	0	0	0	0	0	0	0	0	0	0	0	0	0	0	0	0	0	0	0	0	0	0	0	0	0	0	0	0	0	0	0	0	0	0	0	0	0	0	0.0108495	0	0	0
Fatty Acids, Lipids, and Isoprenoids	Isoprenoids	Dolichol metabolism	Dolichol-phosphate mannosyltransferase (EC 2.4.1.83)	0	0.00197922	0.365255	0.365255	0	0	0	0	0	0	0	0	0	0	0	0	0	0	0	0	0	0	0	0	0	0	0	0	0	0	0	0	0	0	0	0	0	0	0	0	0	0	0	0	0.0494805	0
Fatty Acids, Lipids, and Isoprenoids	Fatty acids	Phospholipid and Fatty acid biosynthesis related cluster	3-hydroxydecanoyl-[ACP] dehydratase (EC 4.2.1.60)	0	0.000694324	0.365255	0.365255	0	0	0	0	0	0	0	0	0	0	0	0	0	0	0	0	0	0	0	0	0	0	0	0	0	0	0	0	0	0	0	0	0	0	0	0	0	0	0	0	0	0
Fatty Acids, Lipids, and Isoprenoids	Isoprenoids	Carotenoids	Phytoene dehydrogenase and related proteins	0	0.00107904	0.365255	0.365255	0	0	0	0	0	0	0	0	0	0	0	0	0	0	0	0	0	0	0	0	0	0	0	0	0	0	0	0	0	0	0	0	0	0	0.026976	0	0	0	0	0	0	0
Fatty Acids, Lipids, and Isoprenoids	Fatty acids	Fatty Acid Biosynthesis FASI	Acetyl-coenzyme A carboxyl transferase of ACAC1 (EC 6.4.1.2)	0	0.000694324	0.365255	0.365255	0	0	0	0	0	0	0	0	0	0	0	0	0	0	0	0	0	0	0	0	0	0	0	0	0	0	0	0	0	0	0	0	0	0	0	0	0	0	0	0	0	0
Fatty Acids, Lipids, and Isoprenoids	Fatty acids	Fatty Acid Biosynthesis FASI	Biotin carboxylase of ACAC1 (EC 6.3.4.14)	0	0.000694324	0.365255	0.365255	0	0	0	0	0	0	0	0	0	0	0	0	0	0	0	0	0	0	0	0	0	0	0	0	0	0	0	0	0	0	0	0	0	0	0	0	0	0	0	0	0	0
Fatty Acids, Lipids, and Isoprenoids	Fatty acids	Fatty Acid Biosynthesis FASII	Trans-2,cis-3-Decenoyl-ACP isomerase	0	0.000433981	0.365255	0.365255	0	0	0	0	0	0	0	0	0	0	0	0	0	0	0	0	0	0	0	0	0	0	0	0	0	0	0	0	0	0	0	0	0	0	0	0	0	0	0.0108495	0	0	0
Fatty Acids, Lipids, and Isoprenoids	Fatty acids	Phospholipid and Fatty acid biosynthesis related cluster	FIG143263: Glycosyl transferase	0	0.00138865	0.365255	0.365255	0	0	0	0	0	0	0	0	0	0	0	0	0	0	0	0	0	0	0	0	0	0	0	0	0	0	0	0	0	0	0	0	0	0	0	0	0	0	0	0	0	0
Fatty Acids, Lipids, and Isoprenoids	Fatty Acids, Lipids, and Isoprenoids	Polyhydroxybutyrate metabolism	D-beta-hydroxybutyrate dehydrogenase (EC 1.1.1.30)	0.0037665	0.00837312	0.413057	0.413057	0	0	0	0	0	0	0	0.0309502	0	0	0	0	0	0	0	0	0	0.0481464	0	0	0	0	0	0	0	0	0	0	0	0	0	0	0	0	0.053952	0	0	0	0.021699	0	0.0989609	0
Fatty Acids, Lipids, and Isoprenoids	Fatty acids	Phospholipid and Fatty acid biosynthesis related cluster	FIG017861: hypothetical protein	0.0108101	0.0212034	0.414521	0.414521	0	0	0	0	0	0	0	0	0	0	0	0	0	0	0	0.130719	0	0.0962927	0	0	0	0	0.0335402	0	0	0	0	0	0	0.0203004	0.0819001	0.0551876	0	0	0.026976	0.21322	0	0	0	0	0.0989609	0
Fatty Acids, Lipids, and Isoprenoids	Triacylglycerols	Triacylglycerol metabolism	Lysophospholipase L2 (EC 3.1.1.5)	0.0501253	0.0146743	0.447691	0.447691	0	0	0	0	0	0	0	0	0	0	0	0	0	0	1.05263	0	0	0	0	0	0	0.0265816	0	0	0	0.0322061	0	0	0.097371	0	0	0.0551876	0	0	0	0	0	0	0.0108495	0	0	0.0563222
Fatty Acids, Lipids, and Isoprenoids	Isoprenoids	Isoprenoid Biosynthesis	2-C-methyl-D-erythritol 4-phosphate cytidylyltransferase (EC 2.7.7.60) - #2	0.0107333	0.0167965	0.455374	0.455374	0	0.0956938	0	0	0	0.0180115	0.0192049	0.0309502	0	0.0615385	0	0	0	0	0	0	0	0	0	0	0	0.0265816	0.0167701	0	0	0.0644122	0	0	0	0.0203004	0.0819001	0	0	0	0.026976	0	0.0312695	0	0.021699	0	0	0.112644
Fatty Acids, Lipids, and Isoprenoids	Isoprenoids	polyprenyl synthesis	2-C-methyl-D-erythritol 4-phosphate cytidylyltransferase (EC 2.7.7.60) - #3	0.0107333	0.0167965	0.455374	0.455374	0	0.0956938	0	0	0	0.0180115	0.0192049	0.0309502	0	0.0615385	0	0	0	0	0	0	0	0	0	0	0	0.0265816	0.0167701	0	0	0.0644122	0	0	0	0.0203004	0.0819001	0	0	0	0.026976	0	0.0312695	0	0.021699	0	0	0.112644
Fatty Acids, Lipids, and Isoprenoids	Fatty acids	Fatty Acid Biosynthesis FASII	3-hydroxydecanoyl-[acyl-carrier-protein] dehydratase (EC 4.2.1.60)	0.00144827	0.00686106	0.480994	0.480994	0	0	0	0	0	0	0	0	0	0	0.0304136	0	0	0	0	0	0	0	0	0	0	0	0	0	0	0	0	0	0	0	0	0	0	0	0	0	0	0	0	0.171527	0	0
Fatty Acids, Lipids, and Isoprenoids	Fatty acids	Fatty Acid Biosynthesis FASII	3-oxoacyl-[acyl-carrier-protein] synthase, KASI (EC 2.3.1.41)	0.00794578	0.00431921	0.499123	0.499123	0	0	0	0	0	0.0540346	0	0.0619003	0	0.0205128	0.0304136	0	0	0	0	0	0	0	0	0	0	0	0	0	0	0	0	0	0	0	0	0	0	0	0	0	0	0	0.021699	0	0	0
Fatty Acids, Lipids, and Isoprenoids	Phospholipids	Glycerolipid and Glycerophospholipid Metabolism in Bacteria	Glycerol-3-phosphate acyltransferase (EC 2.3.1.15)	0.0100385	0.00380518	0.505086	0.505086	0	0	0	0	0	0	0	0	0	0.0205128	0	0	0.190295	0	0	0	0	0	0	0	0	0	0	0	0.0951294	0	0	0	0	0	0	0	0	0	0	0	0	0	0	0	0	0
Fatty Acids, Lipids, and Isoprenoids	Fatty acids	Fatty Acid Biosynthesis FASII	Malonyl CoA-acyl carrier protein transacylase (EC 2.3.1.39) - #2	0.0135133	0.0186779	0.512501	0.512501	0	0	0	0	0	0.0360231	0.0576147	0	0.070555	0.0410256	0.0304136	0	0	0	0	0	0	0.0481464	0	0	0	0	0.0167701	0.0331345	0.0380518	0	0	0	0	0.0203004	0.0819001	0	0	0	0	0	0.0625391	0	0.0325486	0	0	0
Fatty Acids, Lipids, and Isoprenoids	Triacylglycerols	Triacylglycerol metabolism	Lysophospholipase (EC 3.1.1.5)	0.0122016	0.0196637	0.523472	0.523472	0	0.0956938	0	0	0	0	0.0576147	0.0619003	0	0.0410256	0	0	0	0	0	0	0	0	0	0	0	0	0	0	0	0	0	0	0	0.0203004	0.0819001	0	0	0	0	0.21322	0.0312695	0	0	0	0.0494805	0
Fatty Acids, Lipids, and Isoprenoids	Phospholipids	Glycerolipid and Glycerophospholipid Metabolism in Bacteria	Cardiolipin synthetase (EC 2.7.8.-) - #1	0.040894	0.0562424	0.531056	0.531056	0	0.0956938	0.0997009	0	0	0.0900576	0.0384098	0.123801	0.164628	0.102564	0.0304136	0	0	0	0	0.0653595	0	0.0481464	0	0	0	0.0531632	0.0167701	0	0.0570776	0	0	0	0	0.121803	0.0819001	0.110375	0.452489	0	0.053952	0.21322	0.156348	0	0.0542476	0	0	0
Fatty Acids, Lipids, and Isoprenoids	Phospholipids	Cardiolipin synthesis	Cardiolipin synthetase (EC 2.7.8.-)	0.040894	0.0562424	0.531056	0.531056	0	0.0956938	0.0997009	0	0	0.0900576	0.0384098	0.123801	0.164628	0.102564	0.0304136	0	0	0	0	0.0653595	0	0.0481464	0	0	0	0.0531632	0.0167701	0	0.0570776	0	0	0	0	0.121803	0.0819001	0.110375	0.452489	0	0.053952	0.21322	0.156348	0	0.0542476	0	0	0
Fatty Acids, Lipids, and Isoprenoids	Phospholipids	Glycerolipid and Glycerophospholipid Metabolism in Bacteria	Acyl-phosphate:glycerol-3-phosphate O-acyltransferase PlsY	0.0127567	0.00891624	0.541825	0.541825	0	0	0	0	0	0.0360231	0.0384098	0.0309502	0.070555	0.0615385	0.0304136	0	0	0	0	0	0	0	0	0	0	0.0265816	0	0	0	0	0	0	0	0.0203004	0	0	0	0	0	0	0.0312695	0	0.021699	0	0	0
Fatty Acids, Lipids, and Isoprenoids	Phospholipids	Glycerolipid and Glycerophospholipid Metabolism in Bacteria	Phosphatidylglycerophosphatase B (EC 3.1.3.27)	0.00425956	0.00258538	0.547249	0.547249	0	0	0	0	0	0.0180115	0	0	0	0.0410256	0.0304136	0	0	0	0	0	0	0	0	0	0	0	0	0	0	0	0	0	0	0.0203004	0	0	0	0	0.026976	0	0	0	0	0	0	0
Fatty Acids, Lipids, and Isoprenoids	Fatty acids	Fatty Acid Biosynthesis FASII	Biotin carboxylase of acetyl-CoA carboxylase (EC 6.3.4.14)	0.0247735	0.0187358	0.557663	0.557663	0	0.0956938	0.0997009	0	0	0.0540346	0.0768197	0.0619003	0.070555	0.0615385	0	0	0	0	0	0	0	0	0	0	0	0	0.0167701	0	0.0190259	0.0322061	0	0.104275	0	0	0	0	0	0	0	0	0.0625391	0	0.0433981	0	0	0.0844832
Fatty Acids, Lipids, and Isoprenoids	Phospholipids	Glycerolipid and Glycerophospholipid Metabolism in Bacteria	CDP-diacylglycerol pyrophosphatase (EC 3.6.1.26)	0.00230596	0.00128824	0.623937	0.623937	0	0	0	0	0	0.0180115	0	0	0	0	0.0304136	0	0	0	0	0	0	0	0	0	0	0	0	0	0	0.0322061	0	0	0	0	0	0	0	0	0	0	0	0	0	0	0	0
Fatty Acids, Lipids, and Isoprenoids	Phospholipids	Glycerolipid and Glycerophospholipid Metabolism in Bacteria	1-acyl-sn-glycerol-3-phosphate acyltransferase (EC 2.3.1.51)	0.0191375	0.0151439	0.648623	0.648623	0	0.0956938	0.0997009	0	0	0.0360231	0.0960246	0	0.0235183	0.0205128	0.0304136	0	0	0	0	0	0	0	0	0	0	0.0265816	0.0335402	0	0.0761035	0	0	0	0	0.0203004	0	0	0	0	0	0	0.0312695	0	0.021699	0	0	0.0563222
Fatty Acids, Lipids, and Isoprenoids	Fatty Acids, Lipids, and Isoprenoids	Polyhydroxybutyrate metabolism	Short chain fatty acids transporter	0.00177221	0.00106326	0.662322	0.662322	0	0	0	0	0	0.0180115	0.0192049	0	0	0	0	0	0	0	0	0	0	0	0	0	0	0.0265816	0	0	0	0	0	0	0	0	0	0	0	0	0	0	0	0	0	0	0	0
Fatty Acids, Lipids, and Isoprenoids	Fatty acids	Phospholipid and Fatty acid biosynthesis related cluster	FIGfam138462: Acyl-CoA synthetase, AMP-(fatty) acid ligase	0.00229268	0.00357104	0.679234	0.679234	0	0	0	0	0	0	0	0	0	0	0	0	0	0	0	0	0	0.0481464	0	0	0	0	0	0	0	0	0	0	0	0.0406009	0	0	0	0	0.026976	0	0	0	0.021699	0	0	0
Fatty Acids, Lipids, and Isoprenoids	Fatty acids	Phospholipid and Fatty acid biosynthesis related cluster	(3R)-hydroxymyristoyl-[ACP] dehydratase (EC 4.2.1.-)	0.00229268	0.00357104	0.679234	0.679234	0	0	0	0	0	0	0	0	0	0	0	0	0	0	0	0	0	0.0481464	0	0	0	0	0	0	0	0	0	0	0	0.0406009	0	0	0	0	0.026976	0	0	0	0.021699	0	0	0
Fatty Acids, Lipids, and Isoprenoids	Phospholipids	Glycerolipid and Glycerophospholipid Metabolism in Bacteria	Acyl carrier protein - #3	0.0284765	0.0381515	0.691724	0.691724	0	0.191388	0.0997009	0	0	0.0540346	0.0960246	0.0619003	0.0235183	0.0410256	0.0304136	0	0	0	0	0	0	0	0	0	0	0.0265816	0.0167701	0.0331345	0.0190259	0.0322061	0	0	0	0.0406009	0	0	0	0	0.053952	0	0	0	0.0867961	0	0.0494805	0.506899
Fatty Acids, Lipids, and Isoprenoids	Fatty acids	Fatty Acid Biosynthesis FASII	Acyl carrier protein - #2	0.0284765	0.0381515	0.691724	0.691724	0	0.191388	0.0997009	0	0	0.0540346	0.0960246	0.0619003	0.0235183	0.0410256	0.0304136	0	0	0	0	0	0	0	0	0	0	0.0265816	0.0167701	0.0331345	0.0190259	0.0322061	0	0	0	0.0406009	0	0	0	0	0.053952	0	0	0	0.0867961	0	0.0494805	0.506899
Fatty Acids, Lipids, and Isoprenoids	Isoprenoids	Carotenoids	Geranylgeranyl pyrophosphate synthetase (EC 2.5.1.29) - #1	0.0235844	0.029403	0.692313	0.692313	0	0	0	0	0	0.0180115	0.0192049	0	0.0235183	0.0205128	0.121655	0	0	0	0	0.196078	0	0.0962927	0	0	0	0.0265816	0.0503102	0	0.0190259	0.0644122	0	0	0	0.0203004	0	0	0	0	0	0.21322	0	0	0.0542476	0	0.0494805	0.0281611
Fatty Acids, Lipids, and Isoprenoids	Isoprenoids	Archaeal lipids	Geranylgeranyl pyrophosphate synthetase (EC 2.5.1.29)	0.0235844	0.029403	0.692313	0.692313	0	0	0	0	0	0.0180115	0.0192049	0	0.0235183	0.0205128	0.121655	0	0	0	0	0.196078	0	0.0962927	0	0	0	0.0265816	0.0503102	0	0.0190259	0.0644122	0	0	0	0.0203004	0	0	0	0	0	0.21322	0	0	0.0542476	0	0.0494805	0.0281611
Fatty Acids, Lipids, and Isoprenoids	Isoprenoids	Archaeal lipids	Mevalonate kinase (EC 2.7.1.36)	0.00410372	0.00566333	0.694075	0.694075	0	0	0	0	0	0.0360231	0.0192049	0.0309502	0	0	0	0	0	0	0	0	0	0	0	0	0	0.0265816	0.0167701	0.0331345	0	0	0	0	0	0	0	0	0	0	0	0	0	0	0.0650971	0	0	0
Fatty Acids, Lipids, and Isoprenoids	Isoprenoids	Isoprenoid Biosynthesis	Mevalonate kinase (EC 2.7.1.36) - #1	0.00410372	0.00566333	0.694075	0.694075	0	0	0	0	0	0.0360231	0.0192049	0.0309502	0	0	0	0	0	0	0	0	0	0	0	0	0	0.0265816	0.0167701	0.0331345	0	0	0	0	0	0	0	0	0	0	0	0	0	0	0.0650971	0	0	0
Fatty Acids, Lipids, and Isoprenoids	Triacylglycerols	Triacylglycerol metabolism	Monoglyceride lipase (EC 3.1.1.23)	0.0122016	0.0163877	0.712237	0.712237	0	0.0956938	0	0	0	0	0.0576147	0.0619003	0	0.0410256	0	0	0	0	0	0	0	0	0	0	0	0	0	0	0	0	0	0	0	0.0203004	0	0	0	0	0	0.21322	0.0312695	0	0	0	0.0494805	0
Fatty Acids, Lipids, and Isoprenoids	Fatty Acids, Lipids, and Isoprenoids	Polyhydroxybutyrate metabolism	D-beta-hydroxybutyrate permease	0.0108101	0.00791357	0.721379	0.721379	0	0	0	0	0	0	0	0	0	0	0	0	0	0	0	0.130719	0	0.0962927	0	0	0	0	0	0	0.0190259	0	0	0	0	0	0	0	0	0	0.026976	0	0	0	0.021699	0	0	0
Fatty Acids, Lipids, and Isoprenoids	Fatty acids	Fatty acid degradation regulons	Long-chain fatty acid transport protein	0.00324603	0.00466187	0.741145	0.741145	0	0	0	0	0	0.0180115	0.0192049	0.0309502	0	0	0	0	0	0	0	0	0	0	0	0	0	0	0	0	0	0	0	0	0	0	0	0	0	0	0	0	0	0	0.0108495	0	0	0
Fatty Acids, Lipids, and Isoprenoids	Isoprenoids	Polyprenyl Diphosphate Biosynthesis	Octaprenyl-diphosphate synthase (EC 2.5.1.-)	0.036515	0.0312016	0.746648	0.746648	0	0	0	0	0	0.0360231	0.0384098	0	0.0470367	0.0410256	0.121655	0	0.190295	0	0	0.196078	0	0.0962927	0	0	0	0.0265816	0.0335402	0	0	0.0644122	0	0	0	0.0406009	0	0	0	0	0.026976	0.21322	0.0312695	0	0.0325486	0	0.0494805	0
Fatty Acids, Lipids, and Isoprenoids	Phospholipids	Glycerolipid and Glycerophospholipid Metabolism in Bacteria	Diacylglycerol kinase (EC 2.7.1.107)	0.00630075	0.00479305	0.767348	0.767348	0	0	0	0	0	0.0360231	0	0	0	0	0	0	0	0	0	0	0	0.0962927	0	0	0	0	0.0335402	0	0	0	0	0	0	0.0203004	0	0	0	0	0	0	0.0312695	0	0	0	0	0
Fatty Acids, Lipids, and Isoprenoids	Isoprenoids	Carotenoids	Geranyltranstransferase (farnesyldiphosphate synthase) (EC 2.5.1.10) - #1	0.0227267	0.026474	0.799713	0.799713	0	0	0	0	0	0	0.0192049	0	0.0235183	0.0205128	0.121655	0	0	0	0	0.196078	0	0.0962927	0	0	0	0	0.0335402	0	0	0.0644122	0	0	0	0.0203004	0	0	0	0	0	0.21322	0	0	0.0433981	0	0.0494805	0.0281611
Fatty Acids, Lipids, and Isoprenoids	Isoprenoids	Isoprenoid Biosynthesis	Geranyltranstransferase (farnesyldiphosphate synthase) (EC 2.5.1.10) - #2	0.0227267	0.026474	0.799713	0.799713	0	0	0	0	0	0	0.0192049	0	0.0235183	0.0205128	0.121655	0	0	0	0	0.196078	0	0.0962927	0	0	0	0	0.0335402	0	0	0.0644122	0	0	0	0.0203004	0	0	0	0	0	0.21322	0	0	0.0433981	0	0.0494805	0.0281611
Fatty Acids, Lipids, and Isoprenoids	Isoprenoids	Archaeal lipids	Geranyltranstransferase (farnesyldiphosphate synthase) (EC 2.5.1.10)	0.0227267	0.026474	0.799713	0.799713	0	0	0	0	0	0	0.0192049	0	0.0235183	0.0205128	0.121655	0	0	0	0	0.196078	0	0.0962927	0	0	0	0	0.0335402	0	0	0.0644122	0	0	0	0.0203004	0	0	0	0	0	0.21322	0	0	0.0433981	0	0.0494805	0.0281611
Fatty Acids, Lipids, and Isoprenoids	Isoprenoids	Archaeal lipids	Dimethylallyltransferase (EC 2.5.1.1)	0.0235844	0.026474	0.844503	0.844503	0	0	0	0	0	0.0180115	0.0192049	0	0.0235183	0.0205128	0.121655	0	0	0	0	0.196078	0	0.0962927	0	0	0	0	0.0335402	0	0	0.0644122	0	0	0	0.0203004	0	0	0	0	0	0.21322	0	0	0.0433981	0	0.0494805	0.0281611
Fatty Acids, Lipids, and Isoprenoids	Isoprenoids	Isoprenoid Biosynthesis	Dimethylallyltransferase (EC 2.5.1.1) - #1	0.0235844	0.026474	0.844503	0.844503	0	0	0	0	0	0.0180115	0.0192049	0	0.0235183	0.0205128	0.121655	0	0	0	0	0.196078	0	0.0962927	0	0	0	0	0.0335402	0	0	0.0644122	0	0	0	0.0203004	0	0	0	0	0	0.21322	0	0	0.0433981	0	0.0494805	0.0281611
Fatty Acids, Lipids, and Isoprenoids	Fatty acids	Fatty Acid Biosynthesis FASII	(3R)-hydroxymyristoyl-[acyl carrier protein] dehydratase (EC 4.2.1.-)	0.0140162	0.0131291	0.905408	0.905408	0	0	0.0997009	0	0	0.0180115	0.0576147	0.0309502	0.0470367	0.0410256	0	0	0	0	0	0	0	0	0	0	0	0	0.0167701	0	0.0761035	0.0322061	0	0	0	0	0	0	0	0	0.026976	0	0.0312695	0	0	0	0.0494805	0
Fatty Acids, Lipids, and Isoprenoids	Fatty acids	Fatty Acid Biosynthesis FASII	Enoyl-[acyl-carrier-protein] reductase [NADH] (EC 1.3.1.9) - #1	0.0190793	0.0211189	0.922269	0.922269	0	0.0956938	0.0997009	0	0	0.0540346	0.0384098	0.0619003	0	0.0205128	0.0304136	0	0	0	0	0	0	0	0	0	0	0.0265816	0	0	0.0380518	0	0	0	0	0	0	0	0.452489	0	0	0	0	0	0.0108495	0	0	0
Fatty Acids, Lipids, and Isoprenoids	Phospholipids	Glycerolipid and Glycerophospholipid Metabolism in Bacteria	Phosphatidylglycerophosphatase A (EC 3.1.3.27)	0.00453083	0.00403704	0.929086	0.929086	0	0	0	0	0	0	0	0	0	0	0	0	0.0951475	0	0	0	0	0	0	0	0	0	0	0	0.0190259	0	0	0	0	0	0.0819001	0	0	0	0	0	0	0	0	0	0	0
Fatty Acids, Lipids, and Isoprenoids	Phospholipids	Glycerolipid and Glycerophospholipid Metabolism in Bacteria	CDP-diacylglycerol--serine O-phosphatidyltransferase (EC 2.7.8.8)	0.0213768	0.0209154	0.972781	0.972781	0	0	0	0	0	0	0.0192049	0.0309502	0.0235183	0.0410256	0.0304136	0	0.190295	0	0	0.0653595	0	0.0481464	0	0	0	0	0	0	0.0380518	0.0322061	0	0.104275	0	0	0	0.0551876	0	0	0.026976	0.21322	0.0312695	0	0.021699	0	0	0
Phages, Prophages, Transposable elements, Plasmids	Phages, Prophages	Phage integration and excision	Phage integrase	0.0183073	0.506133	6.78437e-06	6.78437e-06	0	0	0	0	0	0.0720461	0.0192049	0.123801	0.0470367	0.0615385	0.0608273	0	0	0	0	0	0	0	0	0	0	0.132908	0.0503102	0.132538	0.171233	0.128824	0.506073	0.312826	0.486855	0.263906	0.4095	0.441501	1.80995	0.89153	0.296736	0.639659	0.187617	1.09589	0.162743	0.857633	0.346363	0.112644
Phages, Prophages, Transposable elements, Plasmids	Phages, Prophages	Phage entry and exit	Phage holin	0.00838395	0.128187	0.000946547	0.000946547	0	0	0	0	0	0	0.0192049	0.0619003	0.0235183	0.0410256	0.0304136	0	0	0	0	0	0	0	0	0	0	0.0531632	0.0503102	0.0331345	0.0380518	0.0322061	0.202429	0.104275	0.194742	0.0609013	0	0.0551876	0	0.148588	0.053952	0.639659	0.0625391	0.273973	0.021699	0.343053	0.0989609	0.0281611
Phages, Prophages, Transposable elements, Plasmids	Phages, Prophages	Prophage lysogenic conversion modules	Phage-associated cell wall hydrolase	0	0.0744662	0.00286919	0.00286919	0	0	0	0	0	0	0	0	0	0	0	0	0	0	0	0	0	0	0	0	0	0.0531632	0	0	0.0190259	0	0.101215	0	0	0.0203004	0.0819001	0.0551876	0.452489	0.148588	0.026976	0.21322	0	0.273973	0.0108495	0.171527	0.0494805	0
Phages, Prophages, Transposable elements, Plasmids	Phages, Prophages	Phage tail proteins 2	Phage tail assembly	0.000976801	0.131276	0.00389561	0.00389561	0	0	0	0	0	0	0	0	0	0.0205128	0	0	0	0	0	0	0	0	0	0	0	0.186071	0.0670803	0.0994036	0.0570776	0.161031	0.506073	0	0.194742	0.0609013	0	0	0	0.222883	0	0.426439	0	0.821918	0.0650971	0	0	0.0844832
Phages, Prophages, Transposable elements, Plasmids	Transposable elements	CBSS-203122.12.peg.188	Transposase OrfAB, subunit B	0	0.0368719	0.00499516	0.00499516	0	0	0	0	0	0	0	0	0	0	0	0	0	0	0	0	0	0	0	0	0	0.0531632	0.0335402	0.0331345	0.0380518	0.0322061	0.101215	0.104275	0	0	0	0	0	0	0.026976	0.21322	0	0	0.0108495	0.171527	0	0
Phages, Prophages, Transposable elements, Plasmids	Phages, Prophages	Staphylococcal phi-Mu50B-like prophages	phi 11 orf33 homolog [SA bacteriophages 11, Mu50B]	0	0.0235999	0.00564461	0.00564461	0	0	0	0	0	0	0	0	0	0	0	0	0	0	0	0	0	0	0	0	0	0.0265816	0.0167701	0	0.0190259	0.0322061	0.101215	0.104275	0.097371	0	0	0	0	0	0	0	0	0	0.0108495	0	0	0
Phages, Prophages, Transposable elements, Plasmids	Phages, Prophages	Phage tail proteins 2	Phage tail length tape-measure protein	0.0833752	0.424508	0.00787712	0.00787712	0	0.669856	0	0	0	0.180115	0.0960246	0.154751	0.258702	0.14359	0.182482	0	0	0	0	0.0653595	0	0	0	0	0	0.239234	0.10062	0.165673	0.190259	0.322061	1.31579	0	0.292113	0.101502	0.1638	0.331126	0	0.222883	0.215808	0.639659	0.312695	1.91781	0.130194	2.05832	0.445324	0.0563222
Phages, Prophages, Transposable elements, Plasmids	Phages, Prophages	Phage integration and excision	Integrase	0.188302	0.401256	0.00939955	0.00939955	0	0.76555	0.697906	0	0	0.306196	0.134434	0.247601	0.164628	0.14359	0.243309	0	0.190295	0	0	0.261438	0	0.240732	0.558659	0	0	0.15949	0.251551	0.265076	0.228311	0.128824	0	0.417101	0.194742	0.284206	0.4914	0.386313	1.35747	0.742942	0.377664	0	0.218887	0.821918	0.336335	0.686106	0.395844	0.422416
Phages, Prophages, Transposable elements, Plasmids	Transposable elements	CBSS-203122.12.peg.188	MG(2+) CHELATASE FAMILY PROTEIN	0.00144827	0.0179472	0.0140911	0.0140911	0	0	0	0	0	0	0	0	0	0	0.0304136	0	0	0	0	0	0	0	0	0	0	0	0.0167701	0.0331345	0.0190259	0	0	0.104275	0	0	0	0	0	0	0.026976	0	0	0	0.021699	0	0.0494805	0.0563222
Phages, Prophages, Transposable elements, Plasmids	Transposable elements	CBSS-203122.12.peg.188	ComM-related protein	0.00144827	0.0179472	0.0140911	0.0140911	0	0	0	0	0	0	0	0	0	0	0.0304136	0	0	0	0	0	0	0	0	0	0	0	0.0167701	0.0331345	0.0190259	0	0	0.104275	0	0	0	0	0	0	0.026976	0	0	0	0.021699	0	0.0494805	0.0563222
Phages, Prophages, Transposable elements, Plasmids	Phages, Prophages	Phage packaging machinery	Phage terminase large subunit, PBSX family	0	0.0175479	0.014365	0.014365	0	0	0	0	0	0	0	0	0	0	0	0	0	0	0	0	0	0	0	0	0	0.0797448	0.0335402	0	0.0761035	0.0322061	0.101215	0	0	0	0	0	0	0	0.026976	0	0	0	0.0108495	0	0	0
Phages, Prophages, Transposable elements, Plasmids	Phages, Prophages	T7-like phage core proteins	T7-like phage DNA Polymerase (EC 2.7.7.7)	0	0.0606669	0.0193784	0.0193784	0	0	0	0	0	0	0	0	0	0	0	0	0	0	0	0	0	0	0	0	0	0.0265816	0.0670803	0.165673	0.0380518	0.0644122	0.404858	0.208551	0.389484	0	0	0	0	0.0742942	0	0	0	0	0.0108495	0	0.0494805	0
Phages, Prophages, Transposable elements, Plasmids	Phages, Prophages	Listeria phi-A118-like prophages	Terminase large subunit [Bacteriophage A118]	0	0.0574825	0.0241812	0.0241812	0	0	0	0	0	0	0	0	0	0	0	0	0	0	0	0	0	0	0	0	0	0.0265816	0	0.0331345	0	0	0	0	0	0	0	0	0.452489	0.148588	0	0.21322	0.0312695	0.273973	0	0.171527	0	0
Phages, Prophages, Transposable elements, Plasmids	Phages, Prophages	Phage tail proteins 2	Phage tail length tape-measure protein 1	0.00487569	0.0479927	0.0246591	0.0246591	0	0	0	0	0	0	0	0.0309502	0	0.0410256	0.0304136	0	0	0	0	0	0	0	0	0	0	0.0531632	0.0167701	0	0.0190259	0.0966184	0.303644	0	0	0.0203004	0	0.0551876	0	0.0742942	0.026976	0	0	0.273973	0	0.171527	0	0
Phages, Prophages, Transposable elements, Plasmids	Phages, Prophages	Phage tail proteins 2	Phage major tail protein	0.00613873	0.102347	0.0251888	0.0251888	0	0	0	0	0	0	0	0.0309502	0.0470367	0.0205128	0.0304136	0	0	0	0	0	0	0	0	0	0	0.132908	0.0838504	0.165673	0.0380518	0.161031	0.202429	0.938478	0.292113	0	0	0.0551876	0	0.0742942	0.026976	0	0.0312695	0	0.0542476	0	0.0494805	0
Phages, Prophages, Transposable elements, Plasmids	Phages, Prophages	r1t-like streptococcal phages	Phage major tail protein - #1	0.00613873	0.102347	0.0251888	0.0251888	0	0	0	0	0	0	0	0.0309502	0.0470367	0.0205128	0.0304136	0	0	0	0	0	0	0	0	0	0	0.132908	0.0838504	0.165673	0.0380518	0.161031	0.202429	0.938478	0.292113	0	0	0.0551876	0	0.0742942	0.026976	0	0.0312695	0	0.0542476	0	0.0494805	0
Phages, Prophages, Transposable elements, Plasmids	Phages, Prophages	Phage DNA synthesis	Glutaredoxin	0.00471775	0.054253	0.0253873	0.0253873	0	0	0	0	0	0	0	0	0	0.0205128	0.0304136	0	0	0	0	0	0	0.0481464	0	0	0	0	0.0167701	0.0331345	0.0190259	0.0322061	0.101215	0	0.097371	0.0203004	0	0.110375	0.452489	0.0742942	0.080928	0.21322	0.0312695	0	0.0108495	0	0	0.0281611
Phages, Prophages, Transposable elements, Plasmids	Phages, Prophages	Phage packaging machinery	Phage terminase, small subunit	0.00091452	0.0335348	0.0258152	0.0258152	0	0	0	0	0	0	0.0192049	0	0	0	0	0	0	0	0	0	0	0	0	0	0	0.0265816	0	0	0	0	0	0	0	0	0	0	0	0	0.026976	0	0.0312695	0.273973	0.021699	0	0.0989609	0.0281611
Phages, Prophages, Transposable elements, Plasmids	Phages, Prophages	Listeria phi-A118-like prophages	Repressor (CI-like) [Bacteriophage A118]	0.00475658	0	0.0264216	0.0264216	0	0	0	0	0	0.0180115	0	0.0309502	0	0.0205128	0.0304136	0	0	0	0	0	0	0	0	0	0	0	0	0	0	0	0	0	0	0	0	0	0	0	0	0	0	0	0	0	0	0
Phages, Prophages, Transposable elements, Plasmids	Phages, Prophages	Phage baseplate proteins	Phage baseplate	0	0.0141799	0.0336302	0.0336302	0	0	0	0	0	0	0	0	0	0	0	0	0	0	0	0	0	0	0	0	0	0.0797448	0	0	0.0570776	0.0322061	0	0	0	0	0	0	0	0	0	0	0	0	0.0108495	0	0	0
Phages, Prophages, Transposable elements, Plasmids	Phages, Prophages	Phage tail proteins 2	Phage tail assembly protein	0.000976801	0.0286648	0.0349591	0.0349591	0	0	0	0	0	0	0	0	0	0.0205128	0	0	0	0	0	0	0	0	0	0	0	0.106326	0.0335402	0.0662691	0.0380518	0.0644122	0.202429	0	0.194742	0	0	0	0	0	0	0	0	0	0.0108495	0	0	0
Phages, Prophages, Transposable elements, Plasmids	Phages, Prophages	Phage regulation of gene expression	Phage repressor	0.0208924	0.114708	0.0356364	0.0356364	0	0	0.0997009	0	0	0.0180115	0.0768197	0.0619003	0.070555	0.0205128	0.0912409	0	0	0	0	0	0	0	0	0	0	0.132908	0.0503102	0.165673	0.0951294	0.128824	0.809717	0.312826	0.584226	0	0	0	0	0	0.026976	0	0.0312695	0	0.0433981	0	0.0494805	0.0281611
Phages, Prophages, Transposable elements, Plasmids	Phages, Prophages	Phage integration and excision	Phage-associated recombinase	0	0.0357194	0.038418	0.038418	0	0	0	0	0	0	0	0	0	0	0	0	0	0	0	0	0	0	0	0	0	0	0	0	0	0	0	0	0	0.0406009	0	0	0	0.0742942	0.053952	0	0.0312695	0	0.0108495	0.343053	0	0
Phages, Prophages, Transposable elements, Plasmids	Phages, Prophages	Phage replication	RNA polymerase, phage-associated	0	0.0198403	0.0388922	0.0388922	0	0	0	0	0	0	0	0	0	0	0	0	0	0	0	0	0	0	0	0	0	0.0265816	0	0.0331345	0.0190259	0.0322061	0	0.104275	0.097371	0	0	0	0	0	0	0	0	0	0.0108495	0	0	0
Phages, Prophages, Transposable elements, Plasmids	Phages, Prophages	T7-like phage core proteins	T7-like phage primase/helicase protein	0.291503	0.0165907	0.0443822	0.0443822	0	0	0	0	0	0	0	0	0	0	0	0.662252	0	2.75229	1.05263	0.0653595	0	0	1.11732	0	0.471698	0	0.0167701	0.0331345	0	0.0322061	0	0.208551	0	0	0	0	0	0	0.026976	0	0	0	0.0108495	0	0	0
Phages, Prophages, Transposable elements, Plasmids	Phages, Prophages	Phage packaging machinery	Phage terminase small subunit	0	0.0234257	0.0583115	0.0583115	0	0	0	0	0	0	0	0	0	0	0	0	0	0	0	0	0	0	0	0	0	0.0265816	0.0335402	0.0662691	0.0190259	0.0322061	0.202429	0	0.194742	0	0	0	0	0	0	0	0	0	0.0108495	0	0	0
Phages, Prophages, Transposable elements, Plasmids	Phages, Prophages	Listeria phi-A118-like prophages	Similar to terminase small subunit, yqaS homolog	0	0.0126435	0.0598902	0.0598902	0	0	0	0	0	0	0	0	0	0	0	0	0	0	0	0	0	0	0	0	0	0	0	0.0662691	0.0190259	0.0322061	0.101215	0	0.097371	0	0	0	0	0	0	0	0	0	0	0	0	0
Phages, Prophages, Transposable elements, Plasmids	Transposable elements	CBSS-203122.12.peg.188	Segregation and condensation protein B - #1	0.0051118	0.0180275	0.0634599	0.0634599	0	0	0	0	0	0.0180115	0.0384098	0	0	0.0205128	0.0304136	0	0	0	0	0	0	0	0	0	0	0.0265816	0	0	0.0380518	0.0644122	0.101215	0	0	0	0.0819001	0	0	0	0.053952	0	0	0	0.021699	0	0	0.0281611
Phages, Prophages, Transposable elements, Plasmids	Phages, Prophages	r1t-like streptococcal phages	Human platelet-binding protein	0.606031	0.216817	0.0733448	0.0733448	0	0	0	0	0	0.0720461	0	0	0.0470367	0.0205128	0	1.98675	0	0.917431	1.05263	0.0653595	1.49254	0.0481464	2.23464	3.84615	0.943396	0.0797448	0.117391	0.198807	0.0761035	0.161031	0.404858	0.208551	0.681597	0	0	0.0551876	0.904977	0.148588	0.026976	0.426439	0.0938086	0.821918	0.0650971	0.171527	0.0989609	0
Phages, Prophages, Transposable elements, Plasmids	Transposable elements	Tn552	ATP-binding protein p271	0.00682173	0	0.0773975	0.0773975	0	0	0	0	0	0.0360231	0.0768197	0	0	0	0.0304136	0	0	0	0	0	0	0	0	0	0	0	0	0	0	0	0	0	0	0	0	0	0	0	0	0	0	0	0	0	0	0
Phages, Prophages, Transposable elements, Plasmids	Transposable elements	CBSS-203122.12.peg.188	ISPsy4, transposition helper protein	0	0.00753078	0.0803831	0.0803831	0	0	0	0	0	0	0	0	0	0	0	0	0	0	0	0	0	0	0	0	0	0.0265816	0	0	0	0.0322061	0	0	0	0	0	0.0551876	0	0.0742942	0	0	0	0	0	0	0	0
Phages, Prophages, Transposable elements, Plasmids	Phages, Prophages	Phage DNA synthesis	Thymidine kinase	0.0128483	0.00386441	0.0816641	0.0816641	0	0	0	0	0	0.0540346	0.0384098	0.0619003	0.0235183	0.0615385	0.0304136	0	0	0	0	0	0	0	0	0	0	0	0	0.0331345	0	0.0322061	0	0	0	0	0	0	0	0	0	0	0.0312695	0	0	0	0	0
Phages, Prophages, Transposable elements, Plasmids	Phages, Prophages	T7-like phage core proteins	T7-like phage endonuclease (EC 3.1.21.2)	0	0.00896643	0.0846193	0.0846193	0	0	0	0	0	0	0	0	0	0	0	0	0	0	0	0	0	0	0	0	0	0.0265816	0.0167701	0	0.0190259	0.0644122	0	0	0.097371	0	0	0	0	0	0	0	0	0	0	0	0	0
Phages, Prophages, Transposable elements, Plasmids	Pathogenicity islands	Staphylococcal pathogenicity islands SaPI	SSU ribosomal protein S18p	0.011771	0.00212616	0.0851599	0.0851599	0	0	0.0997009	0	0	0.0180115	0.0384098	0	0.070555	0.0205128	0	0	0	0	0	0	0	0	0	0	0	0	0.0167701	0	0.0190259	0	0	0	0	0	0	0	0	0	0	0	0	0	0	0	0	0
Phages, Prophages, Transposable elements, Plasmids	Phages, Prophages	Phage replication	DNA ligase, phage-associated	0.491755	0.10674	0.0855878	0.0855878	0	0	0	0	0	0	0	0	0	0	0	1.3245	0	0.917431	2.10526	0	4.47761	0	0.558659	0	0.943396	0	0.134161	0.132538	0.247336	0.386473	0.303644	0.417101	0.778968	0.0203004	0	0	0	0	0.026976	0	0	0	0	0.171527	0.0494805	0
Phages, Prophages, Transposable elements, Plasmids	Phages, Prophages	Listeria phi-A118-like prophages	Integrase [Bacteriophage A118]	0	0.0245723	0.0866562	0.0866562	0	0	0	0	0	0	0	0	0	0	0	0	0	0	0	0	0	0	0	0	0	0	0	0	0.0190259	0	0	0	0	0.0203004	0	0.0551876	0	0.0742942	0	0	0	0.273973	0	0.171527	0	0
Phages, Prophages, Transposable elements, Plasmids	Phages, Prophages	Phage integration and excision	Site-specific tyrosine recombinase	0.00895386	0.00211874	0.0870806	0.0870806	0	0	0	0	0	0.0360231	0.0192049	0.0309502	0	0.0410256	0.0608273	0	0	0	0	0	0	0	0	0	0	0	0	0	0	0	0	0	0	0	0	0	0	0	0	0	0.0312695	0	0.021699	0	0	0
Phages, Prophages, Transposable elements, Plasmids	Phages, Prophages	Phage tail proteins 2	Phage minor tail protein	0.611436	0.244061	0.0913445	0.0913445	0	0	0	0	0	0.0720461	0	0	0.0470367	0.0205128	0	1.98675	0	0.917431	1.05263	0.130719	1.49254	0.0962927	2.23464	3.84615	0.943396	0.106326	0.117391	0.231942	0.0951294	0.161031	0.506073	0.312826	0.778968	0	0	0.0551876	0.904977	0.148588	0.026976	0.639659	0.0938086	0.821918	0.0650971	0.171527	0.0989609	0
Phages, Prophages, Transposable elements, Plasmids	Phages, Prophages	r1t-like streptococcal phages	Phage minor tail protein - #1	0.611436	0.244061	0.0913445	0.0913445	0	0	0	0	0	0.0720461	0	0	0.0470367	0.0205128	0	1.98675	0	0.917431	1.05263	0.130719	1.49254	0.0962927	2.23464	3.84615	0.943396	0.106326	0.117391	0.231942	0.0951294	0.161031	0.506073	0.312826	0.778968	0	0	0.0551876	0.904977	0.148588	0.026976	0.639659	0.0938086	0.821918	0.0650971	0.171527	0.0989609	0
Phages, Prophages, Transposable elements, Plasmids	Phages, Prophages	Phage DNA synthesis	DNA adenine methyltransferase, phage-associated	0.0068533	0.00152207	0.0932032	0.0932032	0	0	0	0	0	0.0180115	0	0.0309502	0.0235183	0.0410256	0.0304136	0	0	0	0	0	0	0	0	0	0	0	0	0	0.0380518	0	0	0	0	0	0	0	0	0	0	0	0	0	0	0	0	0
Phages, Prophages, Transposable elements, Plasmids	Phages, Prophages	r1t-like streptococcal phages	FIG018217: Phage-associated protein	0.226424	0.0705041	0.0992932	0.0992932	0	0	0	0	0	0	0	0	0	0	0	1.3245	0	0	1.05263	0.0653595	0	0	0.558659	1.28205	0.471698	0	0.0167701	0.0331345	0	0.0322061	0	0.208551	0	0.0203004	0	0	0	0.0742942	0.053952	0.21322	0	0.547945	0.021699	0.171527	0.0989609	0
Phages, Prophages, Transposable elements, Plasmids	Phages, Prophages	Phage packaging machinery	Phage terminase, ATPase subunit	0.0983433	0	0.103375	0.103375	0	0	0	0	0	0	0	0	0	0	0	0	0.0951475	0.917431	1.05263	0	0	0	0	0	0	0	0	0	0	0	0	0	0	0	0	0	0	0	0	0	0	0	0	0	0	0
Phages, Prophages, Transposable elements, Plasmids	Phages, Prophages	Staphylococcal phi-Mu50B-like prophages	Antirepressor [SA bacteriophages 11, Mu50B]	0	0.00852377	0.10648	0.10648	0	0	0	0	0	0	0	0	0	0	0	0	0	0	0	0	0	0	0	0	0	0.0797448	0.0670803	0.0662691	0	0	0	0	0	0	0	0	0	0	0	0	0	0	0	0	0	0
Phages, Prophages, Transposable elements, Plasmids	Phages, Prophages	Phage capsid proteins	Phage minor capsid protein	0.245129	0.51193	0.109597	0.109597	0	0.0956938	0	0	0	0	0	0	0	0	0	1.3245	0	0	0	0	0	0	0.558659	1.28205	1.88679	0.106326	0.134161	0.265076	0.228311	0.257649	1.21457	0.417101	0.681597	0.0609013	0.1638	0.275938	0.452489	0.297177	0.215808	1.70576	0.156348	2.19178	0.0976457	1.20069	0.148441	0.0844832
Phages, Prophages, Transposable elements, Plasmids	Phages, Prophages	Phage tail proteins 2	Phage tail assembly protein I	0.000976801	0.00883026	0.114368	0.114368	0	0	0	0	0	0	0	0	0	0.0205128	0	0	0	0	0	0	0	0	0	0	0	0.0265816	0.0167701	0.0331345	0	0.0322061	0.101215	0	0	0	0	0	0	0	0	0	0	0	0.0108495	0	0	0
Phages, Prophages, Transposable elements, Plasmids	Phages, Prophages	Phage Ea cluster	Phage EaA2 protein	0.00292209	0	0.11979	0.11979	0	0	0	0	0	0	0	0.0309502	0	0	0.0304136	0	0	0	0	0	0	0	0	0	0	0	0	0	0	0	0	0	0	0	0	0	0	0	0	0	0	0	0	0	0	0
Phages, Prophages, Transposable elements, Plasmids	Pathogenicity islands	Staphylococcal pathogenicity islands SaPI	GMP synthase [glutamine-hydrolyzing] (EC 6.3.5.2) - #1	0.0271504	0.065547	0.121343	0.121343	0	0	0.0997009	0	0	0	0.0576147	0.0619003	0.0470367	0.0820513	0.0304136	0	0.0951475	0	0	0	0	0.0962927	0	0	0	0.0265816	0	0.0662691	0.0380518	0.0322061	0.202429	0	0	0.0203004	0	0	0.452489	0	0.026976	0	0.0625391	0	0.0867961	0.171527	0	0.25345
Phages, Prophages, Transposable elements, Plasmids	Phages, Prophages	Phage capsid proteins	Phage capsid protein	0.00256819	0.0119004	0.122661	0.122661	0	0	0	0	0	0	0	0	0.0235183	0	0.0304136	0	0	0	0	0	0	0	0	0	0	0	0	0	0.0190259	0	0	0	0	0	0	0.0551876	0	0	0.026976	0	0	0	0.021699	0	0	0
Phages, Prophages, Transposable elements, Plasmids	Plasmid related functions	Rolling-circle replication	Replication initiation protein, topisomerase	0.00256819	0	0.123018	0.123018	0	0	0	0	0	0	0	0	0.0235183	0	0.0304136	0	0	0	0	0	0	0	0	0	0	0	0	0	0	0	0	0	0	0	0	0	0	0	0	0	0	0	0	0	0	0
Phages, Prophages, Transposable elements, Plasmids	Phages, Prophages	Phage Dual Exonuclease Exclusion	Exodeoxyribonuclease X (EC 3.1.11.-)	0.00259374	0	0.123467	0.123467	0	0	0	0	0	0	0	0.0309502	0.0235183	0	0	0	0	0	0	0	0	0	0	0	0	0	0	0	0	0	0	0	0	0	0	0	0	0	0	0	0	0	0	0	0	0
Phages, Prophages, Transposable elements, Plasmids	Pathogenicity islands	Staphylococcal pathogenicity islands SaPI	Heat shock protein 60 family chaperone GroEL	0.0320599	0.0583092	0.127406	0.127406	0	0.0956938	0	0	0	0.0720461	0.0768197	0.0309502	0.0235183	0.0205128	0.0304136	0	0	0	0	0.130719	0	0.192585	0	0	0	0.132908	0.0838504	0.0994036	0.0380518	0.225443	0	0	0	0.0203004	0.0819001	0.0551876	0	0.0742942	0.107904	0	0.0625391	0	0.0976457	0	0	0.168966
Phages, Prophages, Transposable elements, Plasmids	Transposable elements	Tn552	Resolvase/integrase Bin	0.00560882	0.00125078	0.127876	0.127876	0	0	0	0	0	0.0180115	0.0384098	0.0309502	0	0	0.0304136	0	0	0	0	0	0	0	0	0	0	0	0	0	0	0	0	0	0	0	0	0	0	0	0	0	0.0312695	0	0	0	0	0
Phages, Prophages, Transposable elements, Plasmids	Phages, Prophages	Staphylococcal phi-Mu50B-like prophages	Putative major teichoic acid biosynthesis protein C - #1	0.00371366	0	0.128181	0.128181	0	0	0	0	0	0	0	0.0309502	0.0470367	0	0	0	0	0	0	0	0	0	0	0	0	0	0	0	0	0	0	0	0	0	0	0	0	0	0	0	0	0	0	0	0	0
Phages, Prophages, Transposable elements, Plasmids	Phages, Prophages	T7-like phage core proteins	T7-like phage head-to-tail joining protein - #1	0	0.00718217	0.128416	0.128416	0	0	0	0	0	0	0	0	0	0	0	0	0	0	0	0	0	0	0	0	0	0.0531632	0	0	0.0380518	0	0	0	0	0	0	0	0	0	0	0	0	0	0	0	0	0
Phages, Prophages, Transposable elements, Plasmids	Phages, Prophages	Phage capsid proteins	T7-like phage head-to-tail joining protein	0	0.00718217	0.128416	0.128416	0	0	0	0	0	0	0	0	0	0	0	0	0	0	0	0	0	0	0	0	0	0.0531632	0	0	0.0380518	0	0	0	0	0	0	0	0	0	0	0	0	0	0	0	0	0
Phages, Prophages, Transposable elements, Plasmids	Phages, Prophages	Phage replication	Phage DNA replication protein P	0.00233151	0	0.133507	0.133507	0	0	0	0	0	0.0180115	0	0.0309502	0	0	0	0	0	0	0	0	0	0	0	0	0	0	0	0	0	0	0	0	0	0	0	0	0	0	0	0	0	0	0	0	0	0
Phages, Prophages, Transposable elements, Plasmids	Phages, Prophages	Phage integration and excision	Site-specific recombinase	0.0298807	0.0544513	0.135135	0.135135	0	0.191388	0.0997009	0	0	0.0180115	0.0384098	0.0928505	0.0470367	0.0615385	0.0304136	0	0	0	0	0	0	0.0481464	0	0	0	0.0531632	0.0335402	0.165673	0.0570776	0.0322061	0	0.104275	0.097371	0.0203004	0	0	0	0	0.053952	0	0.0312695	0	0.0759466	0.171527	0	0.140805
Phages, Prophages, Transposable elements, Plasmids	Gene Transfer Agent (GTA)	Gene Transfer Agent	Gene Transfer Agent FAD/FMN-containing dehydrogenase	0	0.00560582	0.135523	0.135523	0	0	0	0	0	0	0	0	0	0	0	0	0	0	0	0	0	0	0	0	0	0	0	0	0.0190259	0.0322061	0	0	0	0	0	0	0	0	0	0	0	0	0.0108495	0	0	0
Phages, Prophages, Transposable elements, Plasmids	Transposable elements	Conjugative transposon, Bacteroidales	Conjugative transposon protein TraH	0	0.0138847	0.137362	0.137362	0	0	0	0	0	0	0	0	0	0	0	0	0	0	0	0	0	0	0	0	0	0.0265816	0.0167701	0.0331345	0.0190259	0.0322061	0	0.208551	0	0	0	0	0	0	0	0	0	0	0.0108495	0	0	0
Phages, Prophages, Transposable elements, Plasmids	Transposable elements	Tn552	Beta-lactamase (EC 3.5.2.6)	0.0119344	0.00264132	0.13898	0.13898	0	0.0956938	0.0997009	0	0	0.0360231	0.0192049	0	0	0	0	0	0	0	0	0	0	0	0	0	0	0	0	0	0	0	0	0	0	0	0	0	0	0	0.026976	0	0	0	0.021699	0	0	0
Phages, Prophages, Transposable elements, Plasmids	Transposable elements	Conjugative transposon, Bacteroidales	Putative mobilization protein BF0133	0	0.00723046	0.140488	0.140488	0	0	0	0	0	0	0	0	0	0	0	0	0	0	0	0	0	0	0	0	0	0.0265816	0.0167701	0.0331345	0	0	0	0.104275	0	0	0	0	0	0	0	0	0	0	0	0	0	0
Phages, Prophages, Transposable elements, Plasmids	Phages, Prophages	Phage packaging machinery	Phage DNA-binding protein	0.00616811	0.00125078	0.147629	0.147629	0	0	0	0	0	0.0180115	0.0192049	0.0619003	0	0	0.0304136	0	0	0	0	0	0	0	0	0	0	0	0	0	0	0	0	0	0	0	0	0	0	0	0	0	0.0312695	0	0	0	0	0
Phages, Prophages, Transposable elements, Plasmids	Phages, Prophages	Phage integration and excision	Phage excisionase	0	0.00547667	0.165541	0.165541	0	0	0	0	0	0	0	0	0	0	0	0	0	0	0	0	0	0	0	0	0	0	0	0	0	0	0	0	0	0.0203004	0.0819001	0	0	0	0	0	0	0	0	0	0	0
Phages, Prophages, Transposable elements, Plasmids	Phages, Prophages	r1t-like streptococcal phages	site-specific recombinase, phage integrase family	0.375941	0.0184173	0.166253	0.166253	5.88235	0.669856	0.299103	0	0	0.108069	0.230459	0.185701	0.0940734	0.164103	0.212895	0	0	0	0	0	0	0.0481464	0	0	0	0	0.0335402	0	0.0380518	0	0	0	0	0	0	0	0	0	0	0	0.0312695	0	0.021699	0.171527	0	0
Phages, Prophages, Transposable elements, Plasmids	Gene Transfer Agent (GTA)	Gene Transfer Agent	Gene Transfer Agent terminase protein	0	0.0124166	0.179842	0.179842	0	0	0	0	0	0	0	0	0	0	0	0	0	0	0	0	0	0	0	0	0	0.0531632	0.0167701	0	0.0380518	0	0.202429	0	0	0	0	0	0	0	0	0	0	0	0	0	0	0
Phages, Prophages, Transposable elements, Plasmids	Phages, Prophages	Phage entry and exit	Phage maturase	0.197019	0.0139858	0.185567	0.185567	0	0	0.0997009	0	0	0	0	0	0	0	0	0	0	0	1.05263	0	2.98507	0	0	0	0	0	0	0	0.0190259	0	0.303644	0	0	0	0	0	0	0	0.026976	0	0	0	0	0	0	0
Phages, Prophages, Transposable elements, Plasmids	Phages, Prophages	T7-like phage core proteins	T7-like phage exonuclease (EC 3.1.11.3)	0	0.0196301	0.188393	0.188393	0	0	0	0	0	0	0	0	0	0	0	0	0	0	0	0	0	0	0	0	0	0.15949	0.0167701	0	0	0	0.303644	0	0	0	0	0	0	0	0	0	0	0	0.0108495	0	0	0
Phages, Prophages, Transposable elements, Plasmids	Phages, Prophages	Phage packaging machinery	Phage terminase, endonuclease subunit	0.00550763	0	0.19601	0.19601	0	0	0	0	0	0	0	0	0	0.0205128	0	0	0.0951475	0	0	0	0	0	0	0	0	0	0	0	0	0	0	0	0	0	0	0	0	0	0	0	0	0	0	0	0	0
Phages, Prophages, Transposable elements, Plasmids	Phages, Prophages	Phage capsid proteins	Phage capsid assembly protein	0	0.00604477	0.197359	0.197359	0	0	0	0	0	0	0	0	0	0	0	0	0	0	0	0	0	0	0	0	0	0	0.0167701	0.0331345	0	0	0.101215	0	0	0	0	0	0	0	0	0	0	0	0	0	0	0
Phages, Prophages, Transposable elements, Plasmids	Phages, Prophages	Phage Dual Exonuclease Exclusion	Phage DNA binding ATPase	0	0.00571914	0.200661	0.200661	0	0	0	0	0	0	0	0	0	0	0	0	0	0	0	0	0	0	0	0	0	0.0265816	0	0	0.0190259	0	0	0	0.097371	0	0	0	0	0	0	0	0	0	0	0	0	0
Phages, Prophages, Transposable elements, Plasmids	Phages, Prophages	Phage replication	DNA helicase (EC 3.6.1.-)	0.0183504	0.0321776	0.201609	0.201609	0	0	0.0997009	0	0	0.108069	0.0384098	0	0.0235183	0.0205128	0	0	0.0951475	0	0	0	0	0	0	0	0	0.0265816	0.0503102	0.0662691	0.0951294	0	0	0	0.097371	0.0609013	0	0.0551876	0	0	0.026976	0	0.0312695	0	0.0542476	0	0	0.0844832
Phages, Prophages, Transposable elements, Plasmids	Phages, Prophages	Prophage-encoded Rst operon	RstA phage-related replication protein	0	0.00110478	0.203856	0.203856	0	0	0	0	0	0	0	0	0	0	0	0	0	0	0	0	0	0	0	0	0	0	0.0167701	0	0	0	0	0	0	0	0	0	0	0	0	0	0	0	0.0108495	0	0	0
Phages, Prophages, Transposable elements, Plasmids	Phages, Prophages	Phage replication	DNA polymerase, phage-associated	0.0968982	0.180901	0.205903	0.205903	0	0	0	0	0	0.0720461	0.0576147	0.0928505	0.070555	0.0615385	0.0912409	0	0	0	0	0	0	0	1.11732	0	0.471698	0.15949	0.0670803	0.132538	0.0570776	0.161031	0.303644	0.208551	0.292113	0.0203004	0.0819001	0.0551876	0.904977	0.148588	0.053952	0.21322	0.0938086	0.273973	0.0433981	0.171527	0.0494805	0.0281611
Phages, Prophages, Transposable elements, Plasmids	Phages, Prophages	Phage entry and exit	Phage lysozyme (EC 3.2.1.17)	0	0.00208642	0.21005	0.21005	0	0	0	0	0	0	0	0	0	0	0	0	0	0	0	0	0	0	0	0	0	0	0	0.0331345	0.0190259	0	0	0	0	0	0	0	0	0	0	0	0	0	0	0	0	0
Phages, Prophages, Transposable elements, Plasmids	Phages, Prophages	Phage tail proteins 2	Phage major tail shaft protein	0	0.0103123	0.218101	0.218101	0	0	0	0	0	0	0	0	0	0	0	0	0	0	0	0	0	0	0	0	0	0	0	0	0	0	0	0	0	0	0	0	0	0	0	0	0	0	0	0.171527	0	0
Phages, Prophages, Transposable elements, Plasmids	Phages, Prophages	Phage nin genes - N-independent survival	Phage NinX	0	0.0103123	0.218101	0.218101	0	0	0	0	0	0	0	0	0	0	0	0	0	0	0	0	0	0	0	0	0	0	0	0	0	0	0	0	0	0	0	0	0	0	0	0	0	0	0	0.171527	0	0
Phages, Prophages, Transposable elements, Plasmids	Phages, Prophages	Phage replication	DNA primase (EC 2.7.7.-) - #2	0.0402988	0.061938	0.220846	0.220846	0	0	0.0997009	0	0	0.144092	0.0576147	0	0.070555	0.0615385	0.0608273	0	0.190295	0	0	0.0653595	0	0.0962927	0	0	0	0.0797448	0.0503102	0.0662691	0.114155	0.0644122	0.101215	0.104275	0.194742	0.0406009	0.1638	0	0	0	0.026976	0	0.0625391	0	0.0976457	0.171527	0	0.140805
Phages, Prophages, Transposable elements, Plasmids	Phages, Prophages	Phage integration and excision	Phage Holliday junction resolvase	0.00233151	0.00859297	0.22569	0.22569	0	0	0	0	0	0.0180115	0	0.0309502	0	0	0	0	0	0	0	0	0	0	0	0	0	0.0265816	0.0167701	0	0.0380518	0.0322061	0.101215	0	0	0	0	0	0	0	0	0	0	0	0	0	0	0
Phages, Prophages, Transposable elements, Plasmids	Phages, Prophages	Phage regulation of gene expression	Phage antirepressor protein	0.454262	0.256556	0.231028	0.231028	0	0.0956938	0.199402	0	0	0.0360231	0.0192049	0.0309502	0.0470367	0.0205128	0.0304136	1.3245	0	0	2.10526	0.130719	0	0.0962927	2.23464	1.28205	1.88679	0.132908	0.0503102	0.0662691	0.0380518	0.128824	0.303644	0.312826	0.194742	0.101502	0	0.165563	0.452489	0.222883	0.188832	0.426439	0.218887	0.547945	0.0867961	0.857633	0.247402	0.140805
Phages, Prophages, Transposable elements, Plasmids	Phages, Prophages	Phage regulation of gene expression	Phage antirepressor	0.46183	0.269187	0.241476	0.241476	0	0.191388	0.199402	0	0	0.0360231	0.0384098	0.0309502	0.070555	0.0410256	0.0304136	1.3245	0	0	2.10526	0.130719	0	0.0962927	2.23464	1.28205	1.88679	0.132908	0.0670803	0.0662691	0.0380518	0.128824	0.303644	0.417101	0.389484	0.101502	0	0.165563	0.452489	0.222883	0.188832	0.426439	0.218887	0.547945	0.0867961	0.857633	0.247402	0.140805
Phages, Prophages, Transposable elements, Plasmids	Phages, Prophages	r1t-like streptococcal phages	structural protein	0.444073	0.193569	0.241853	0.241853	0	0.191388	0.199402	0	0	0.180115	0.115229	0.0619003	0.258702	0.0615385	0.212895	0	0.0951475	0	1.05263	0.0653595	2.98507	0	0	3.84615	0	0.265816	0.184471	0.198807	0.304414	0.0966184	1.11336	0	0.584226	0.0609013	0	0.0551876	0	0.222883	0.080928	0.21322	0.187617	0.547945	0.0867961	0	0.148441	0
Phages, Prophages, Transposable elements, Plasmids	Phages, Prophages	T7-like phage core proteins	T7-like phage ssDNA-binding protein	0	0.00518308	0.248103	0.248103	0	0	0	0	0	0	0	0	0	0	0	0	0	0	0	0	0	0	0	0	0	0	0	0	0	0.0322061	0	0	0.097371	0	0	0	0	0	0	0	0	0	0	0	0	0
Phages, Prophages, Transposable elements, Plasmids	Transposable elements	Conjugative transposon, Bacteroidales	Conjugative transposon protein TraP	0	0.00175936	0.248855	0.248855	0	0	0	0	0	0	0	0	0	0	0	0	0	0	0	0	0	0	0	0	0	0	0	0.0331345	0	0	0	0	0	0	0	0	0	0	0	0	0	0	0.0108495	0	0	0
Phages, Prophages, Transposable elements, Plasmids	Phages, Prophages	Phage capsid proteins	Phage head maturation protease	0.00203444	0.000433981	0.250365	0.250365	0	0	0	0	0	0	0.0192049	0	0.0235183	0	0	0	0	0	0	0	0	0	0	0	0	0	0	0	0	0	0	0	0	0	0	0	0	0	0	0	0	0	0.0108495	0	0	0
Phages, Prophages, Transposable elements, Plasmids	Phages, Prophages	r1t-like streptococcal phages	putative minor structural protein	0	0.0144102	0.251758	0.251758	0	0	0	0	0	0	0	0	0	0	0	0	0	0	0	0	0	0	0	0	0	0	0	0	0	0	0	0	0	0	0	0	0	0	0	0	0	0.273973	0	0	0	0
Phages, Prophages, Transposable elements, Plasmids	Phages, Prophages	T7-like phage core proteins	T7-like phage DNA-directed RNA polymerase (EC 2.7.7.6)	0.267495	0.10126	0.254336	0.254336	0	0	0	0	0	0	0	0	0	0	0	0.662252	0	0.917431	1.05263	0	2.98507	0	0	0	0	0.531632	0.167701	0.0331345	0.171233	0.257649	0.303644	0.208551	0.486855	0	0	0	0	0	0	0	0	0.273973	0.0108495	0	0	0
Phages, Prophages, Transposable elements, Plasmids	Plasmid related functions	F plasmid replication	CcdA protein (antitoxin to CcdB)	0	0.00459683	0.255139	0.255139	0	0	0	0	0	0	0	0	0	0	0	0	0	0	0	0	0	0	0	0	0	0.0265816	0	0	0	0	0	0	0	0	0	0	0	0	0	0	0	0	0	0	0	0
Phages, Prophages, Transposable elements, Plasmids	Phages, Prophages	r1t-like streptococcal phages	FIG018632: Phage-associated protein	0.0552893	0.0170193	0.260855	0.260855	0	0	0	0	0	0	0	0	0	0	0	0	0	0	0	0.130719	0	0	0.558659	0	0.471698	0	0	0	0.0190259	0	0.101215	0	0	0	0	0	0	0	0	0	0.0312695	0.273973	0	0	0	0
Phages, Prophages, Transposable elements, Plasmids	Phages, Prophages	Phage integration and excision	Phage endonuclease	0.0688141	0.00569308	0.264697	0.264697	0	0.0956938	0	0	0	0	0.0192049	0	0	0	0	0	0	0	0	0	0	0.0481464	0	1.28205	0	0	0	0	0.0380518	0	0	0.104275	0	0	0	0	0	0	0	0	0	0	0	0	0	0
Phages, Prophages, Transposable elements, Plasmids	Phages, Prophages	Phage nin genes - N-independent survival	Phage NinY	0	0.00511185	0.26508	0.26508	0	0	0	0	0	0	0	0	0	0	0	0	0	0	0	0	0	0	0	0	0	0.0265816	0	0	0	0	0.101215	0	0	0	0	0	0	0	0	0	0	0	0	0	0	0
Phages, Prophages, Transposable elements, Plasmids	Phages, Prophages	Phage capsid proteins	Phage capsid vertex	0	0.00511185	0.26508	0.26508	0	0	0	0	0	0	0	0	0	0	0	0	0	0	0	0	0	0	0	0	0	0.0265816	0	0	0	0	0.101215	0	0	0	0	0	0	0	0	0	0	0	0	0	0	0
Phages, Prophages, Transposable elements, Plasmids	Phages, Prophages	Phage replication	DNA polymerase I (EC 2.7.7.7) - #2	0.329364	0.150017	0.267142	0.267142	0	0.0956938	0.0997009	0	0	0.324207	0.0768197	0	0.14111	0.0615385	0.0912409	0	0.190295	0	0	0	1.49254	0.0481464	3.35196	0	0.943396	0.186071	0.10062	0.165673	0.190259	0.193237	0.506073	0.104275	0.194742	0.0609013	0.0819001	0	0	0	0.026976	0.21322	0.0312695	0.547945	0.130194	0.343053	0.0494805	0.225289
Phages, Prophages, Transposable elements, Plasmids	Phages, Prophages	r1t-like streptococcal phages	Helicase loader DnaI - #1	0.0195667	0.00849071	0.275874	0.275874	0	0.191388	0	0	0	0.0540346	0.0576147	0	0.0470367	0	0.0608273	0	0	0	0	0	0	0	0	0	0	0	0	0.0331345	0	0	0	0	0	0	0	0	0	0	0.026976	0	0.0312695	0	0.0325486	0	0	0
Phages, Prophages, Transposable elements, Plasmids	Phages, Prophages	Listeria phi-A118-like prophages	Antirepressor [Bacteriophage A118]	0	0.0435522	0.276669	0.276669	0	0	0	0	0	0	0	0	0	0	0	0	0	0	0	0	0	0	0	0	0	0	0	0	0	0	0	0	0.097371	0	0	0.0551876	0.904977	0	0	0	0.0312695	0	0	0	0	0
Phages, Prophages, Transposable elements, Plasmids	Phages, Prophages	Phage Ea cluster	Phage EaA protein	0.000976801	0	0.280143	0.280143	0	0	0	0	0	0	0	0	0	0.0205128	0	0	0	0	0	0	0	0	0	0	0	0	0	0	0	0	0	0	0	0	0	0	0	0	0	0	0	0	0	0	0	0
Phages, Prophages, Transposable elements, Plasmids	Phages, Prophages	Phage integration and excision	Phage exonuclease (EC 3.1.11.3)	0.000857692	0	0.280143	0.280143	0	0	0	0	0	0.0180115	0	0	0	0	0	0	0	0	0	0	0	0	0	0	0	0	0	0	0	0	0	0	0	0	0	0	0	0	0	0	0	0	0	0	0	0
Phages, Prophages, Transposable elements, Plasmids	Pathogenicity islands	Staphylococcal pathogenicity islands SaPI	Hypothetical SAV0787 homolog in superantigen-encoding pathogenicity islands SaPI	0.000976801	0	0.280143	0.280143	0	0	0	0	0	0	0	0	0	0.0205128	0	0	0	0	0	0	0	0	0	0	0	0	0	0	0	0	0	0	0	0	0	0	0	0	0	0	0	0	0	0	0	0
Phages, Prophages, Transposable elements, Plasmids	Phages, Prophages	Phage regulation of gene expression	Phage antitermination protein Q - #1	0.00111992	0	0.280143	0.280143	0	0	0	0	0	0	0	0	0.0235183	0	0	0	0	0	0	0	0	0	0	0	0	0	0	0	0	0	0	0	0	0	0	0	0	0	0	0	0	0	0	0	0	0
Phages, Prophages, Transposable elements, Plasmids	Phages, Prophages	Phage capsid proteins	Phage capsid scaffolding protein	0.00906166	0	0.280143	0.280143	0	0	0	0	0	0	0	0	0	0	0	0	0.190295	0	0	0	0	0	0	0	0	0	0	0	0	0	0	0	0	0	0	0	0	0	0	0	0	0	0	0	0	0
Phages, Prophages, Transposable elements, Plasmids	Phages, Prophages	Listeria phi-A118-like prophages	Hypothetical protein, Lmo2313 homolog [Bacteriophage A118]	0.000976801	0	0.280143	0.280143	0	0	0	0	0	0	0	0	0	0.0205128	0	0	0	0	0	0	0	0	0	0	0	0	0	0	0	0	0	0	0	0	0	0	0	0	0	0	0	0	0	0	0	0
Phages, Prophages, Transposable elements, Plasmids	Phages, Prophages	Phage nin genes - N-independent survival	Phage antitermination protein Q	0.00111992	0	0.280143	0.280143	0	0	0	0	0	0	0	0	0.0235183	0	0	0	0	0	0	0	0	0	0	0	0	0	0	0	0	0	0	0	0	0	0	0	0	0	0	0	0	0	0	0	0	0
Phages, Prophages, Transposable elements, Plasmids	Phages, Prophages	Staphylococcal phi-Mu50B-like prophages	phi 11 orf36 homolog [SA bacteriophages 11, Mu50B]	0.000857692	0	0.280143	0.280143	0	0	0	0	0	0.0180115	0	0	0	0	0	0	0	0	0	0	0	0	0	0	0	0	0	0	0	0	0	0	0	0	0	0	0	0	0	0	0	0	0	0	0	0
Phages, Prophages, Transposable elements, Plasmids	Phages, Prophages	Phage integration and excision	Putative phage-encoded enzyme involved in integration-recombination	0.000857692	0	0.280143	0.280143	0	0	0	0	0	0.0180115	0	0	0	0	0	0	0	0	0	0	0	0	0	0	0	0	0	0	0	0	0	0	0	0	0	0	0	0	0	0	0	0	0	0	0	0
Phages, Prophages, Transposable elements, Plasmids	Phages, Prophages	Phage integration and excision	Phage exonuclease	0.000857692	0.00392973	0.289537	0.289537	0	0	0	0	0	0.0180115	0	0	0	0	0	0	0	0	0	0	0	0	0	0	0	0	0	0	0	0.0322061	0	0	0	0	0	0.0551876	0	0	0	0	0	0	0.0108495	0	0	0
Phages, Prophages, Transposable elements, Plasmids	Phages, Prophages	Phage regulation of gene expression	Phage antitermination protein	0.00404201	0.00151302	0.296809	0.296809	0	0	0	0	0	0	0	0.0309502	0.0235183	0	0.0304136	0	0	0	0	0	0	0	0	0	0	0	0	0	0	0	0	0	0	0	0	0	0	0	0.026976	0	0	0	0.0108495	0	0	0
Phages, Prophages, Transposable elements, Plasmids	Phages, Prophages	Phage regulation of gene expression	Nudix hydrolase	0.0332512	0.00363975	0.312146	0.312146	0	0	0	0	0	0.0360231	0	0	0	0	0	0.662252	0	0	0	0	0	0	0	0	0	0.0265816	0	0	0	0.0644122	0	0	0	0	0	0	0	0	0	0	0	0	0	0	0	0
Phages, Prophages, Transposable elements, Plasmids	Phages, Prophages	Phage entry and exit	Phage lysin	1.73298	0.259991	0.314047	0.314047	0	0.76555	0.498504	0	33.3333	0.198127	0.115229	0.185701	0.258702	0.205128	0.273723	0	0	0	0	0	0	0	0.558659	0	0	0.132908	0.10062	0.265076	0.152207	0.161031	0.708502	0.104275	0	0.0812018	0.0819001	0.275938	0.452489	0.222883	0.485568	0.639659	0.187617	0.547945	0.141044	0.343053	0.197922	0.0563222
Phages, Prophages, Transposable elements, Plasmids	Phages, Prophages	Phage tail fiber proteins	Phage tail fiber protein	0.070103	0.134889	0.321071	0.321071	0	0	0	0	0	0.0720461	0	0.0928505	0.0470367	0.0615385	0.152068	0	1.04662	0	0	0	0	0	0	0	0	0.265816	0.117391	0.165673	0.285388	0.257649	0.910931	0.312826	0.486855	0.0203004	0	0	0	0.0742942	0	0	0	0	0.021699	0	0	0.0281611
Phages, Prophages, Transposable elements, Plasmids	Phages, Prophages	Phage replication	Single stranded DNA-binding protein, phage-associated	0.0140522	0.00404858	0.342642	0.342642	0	0.0956938	0.199402	0	0	0	0	0	0	0	0	0	0	0	0	0	0	0	0	0	0	0	0	0	0	0	0.101215	0	0	0	0	0	0	0	0	0	0	0	0	0	0	0
Phages, Prophages, Transposable elements, Plasmids	Phages, Prophages	r1t-like streptococcal phages	HNH homing endonuclease - #1	0.0907943	0.166188	0.346125	0.346125	0	0	0	0	0	0	0	0	0.0235183	0	0	1.3245	0	0	0	0	0	0	0.558659	0	0	0.0531632	0.0335402	0	0.0380518	0	0	0	0	0.0609013	0.0819001	0.110375	0.452489	0.148588	0.13488	0.852878	0.0625391	0.547945	0.0433981	0.686106	0.197922	0.0563222
Phages, Prophages, Transposable elements, Plasmids	Phages, Prophages	Phage introns	HNH homing endonuclease	0.0907943	0.166188	0.346125	0.346125	0	0	0	0	0	0	0	0	0.0235183	0	0	1.3245	0	0	0	0	0	0	0.558659	0	0	0.0531632	0.0335402	0	0.0380518	0	0	0	0	0.0609013	0.0819001	0.110375	0.452489	0.148588	0.13488	0.852878	0.0625391	0.547945	0.0433981	0.686106	0.197922	0.0563222
Phages, Prophages, Transposable elements, Plasmids	Phages, Prophages	Phage capsid proteins	Phage capsid and scaffold	0.868394	1.26695	0.346241	0.346241	0	0.0956938	0	0	0	0.0360231	0.115229	0.0619003	0	0.0410256	0.0608273	1.98675	0	0	1.05263	0.261438	2.98507	0.0962927	3.35196	3.84615	4.24528	0.717703	0.218011	0.72896	0.361492	0.450886	2.32794	0.729927	0.97371	0.487211	0.4095	0.496689	6.33484	0.817236	0.377664	3.41151	0.531582	2.73973	0.466529	2.05832	1.23701	0.197128
Phages, Prophages, Transposable elements, Plasmids	Phages, Prophages	r1t-like streptococcal phages	Phage capsid and scaffold - #1	0.868394	1.26695	0.346241	0.346241	0	0.0956938	0	0	0	0.0360231	0.115229	0.0619003	0	0.0410256	0.0608273	1.98675	0	0	1.05263	0.261438	2.98507	0.0962927	3.35196	3.84615	4.24528	0.717703	0.218011	0.72896	0.361492	0.450886	2.32794	0.729927	0.97371	0.487211	0.4095	0.496689	6.33484	0.817236	0.377664	3.41151	0.531582	2.73973	0.466529	2.05832	1.23701	0.197128
Phages, Prophages, Transposable elements, Plasmids	Phages, Prophages	Phage tail fiber proteins	Phage tail fibers	0.255608	0.358968	0.35512	0.35512	0	0.0956938	0	0	0	0.0180115	0.0192049	0.0309502	0.0235183	0.0410256	0.0912409	0.662252	0	0	1.05263	0	1.49254	0	0.558659	1.28205	0	0.398724	0.218011	0.331345	0.342466	0.354267	1.31579	0.625652	0.778968	0.101502	0.2457	0.110375	0.452489	0.148588	0.215808	0.426439	0.0938086	0.273973	0.173592	0.343053	0.247402	0.112644
Phages, Prophages, Transposable elements, Plasmids	Phages, Prophages	Listeria phi-A118-like prophages	Protein gp47, recombination-related [Bacteriophage A118]	0	0.00132538	0.365255	0.365255	0	0	0	0	0	0	0	0	0	0	0	0	0	0	0	0	0	0	0	0	0	0	0	0.0331345	0	0	0	0	0	0	0	0	0	0	0	0	0	0	0	0	0	0
Phages, Prophages, Transposable elements, Plasmids	Phages, Prophages	Phage tail proteins 2	Phage tail sheath monomer	0	0.00353357	0.365255	0.365255	0	0	0	0	0	0	0	0	0	0	0	0	0	0	0	0	0	0	0	0	0	0	0	0	0	0	0	0	0	0	0	0	0	0	0	0	0	0	0	0	0	0
Phages, Prophages, Transposable elements, Plasmids	Phages, Prophages	Listeria phi-A118-like prophages	Tail tape-measure protein [Bacteriophage A118]	0	0.000433981	0.365255	0.365255	0	0	0	0	0	0	0	0	0	0	0	0	0	0	0	0	0	0	0	0	0	0	0	0	0	0	0	0	0	0	0	0	0	0	0	0	0	0	0.0108495	0	0	0
Phages, Prophages, Transposable elements, Plasmids	Phages, Prophages	Phage integration and excision	Integrase/recombinase (XerC/CodV family)	0	0.00220751	0.365255	0.365255	0	0	0	0	0	0	0	0	0	0	0	0	0	0	0	0	0	0	0	0	0	0	0	0	0	0	0	0	0	0	0	0.0551876	0	0	0	0	0	0	0	0	0	0
Phages, Prophages, Transposable elements, Plasmids	Phages, Prophages	Phage nin genes - N-independent survival	Phage NinG rap recombination	0	0.00404858	0.365255	0.365255	0	0	0	0	0	0	0	0	0	0	0	0	0	0	0	0	0	0	0	0	0	0	0	0	0	0	0.101215	0	0	0	0	0	0	0	0	0	0	0	0	0	0	0
Phages, Prophages, Transposable elements, Plasmids	Phages, Prophages	Phage nin genes - N-independent survival	Phage NinF	0	0.000761035	0.365255	0.365255	0	0	0	0	0	0	0	0	0	0	0	0	0	0	0	0	0	0	0	0	0	0	0	0	0.0190259	0	0	0	0	0	0	0	0	0	0	0	0	0	0	0	0	0
Phages, Prophages, Transposable elements, Plasmids	Phages, Prophages, Transposable elements, Plasmids	Integrons	Integron integrase	0	0.000761035	0.365255	0.365255	0	0	0	0	0	0	0	0	0	0	0	0	0	0	0	0	0	0	0	0	0	0	0	0	0.0190259	0	0	0	0	0	0	0	0	0	0	0	0	0	0	0	0	0
Phages, Prophages, Transposable elements, Plasmids	Phages, Prophages	Staphylococcal phi-Mu50B-like prophages	Phage terminase, large subunit [SA bacteriophages 11, Mu50B]	0	0.00345125	0.365255	0.365255	0	0	0	0	0	0	0	0	0	0	0	0	0	0	0	0	0	0	0	0	0	0	0	0	0	0	0	0	0	0	0	0	0	0	0	0	0	0	0	0	0	0
Phages, Prophages, Transposable elements, Plasmids	Phages, Prophages	Phage tail proteins 2	Phage tail connector	0	0.00404858	0.365255	0.365255	0	0	0	0	0	0	0	0	0	0	0	0	0	0	0	0	0	0	0	0	0	0	0	0	0	0	0.101215	0	0	0	0	0	0	0	0	0	0	0	0	0	0	0
Phages, Prophages, Transposable elements, Plasmids	Transposable elements	CBSS-203122.12.peg.188	Predicted nucleotidyltransferases	0	0.00197922	0.365255	0.365255	0	0	0	0	0	0	0	0	0	0	0	0	0	0	0	0	0	0	0	0	0	0	0	0	0	0	0	0	0	0	0	0	0	0	0	0	0	0	0	0	0.0494805	0
Phages, Prophages, Transposable elements, Plasmids	Gene Transfer Agent (GTA)	Gene Transfer Agent	Gene Transfer Agent NlpC/P60 family peptidase	0	0.00197922	0.365255	0.365255	0	0	0	0	0	0	0	0	0	0	0	0	0	0	0	0	0	0	0	0	0	0	0	0	0	0	0	0	0	0	0	0	0	0	0	0	0	0	0	0	0.0494805	0
Phages, Prophages, Transposable elements, Plasmids	Phages, Prophages	Listeria phi-A118-like prophages	Protein gp49, replication initiation [Bacteriophage A118]	0	0.00107904	0.365255	0.365255	0	0	0	0	0	0	0	0	0	0	0	0	0	0	0	0	0	0	0	0	0	0	0	0	0	0	0	0	0	0	0	0	0	0	0.026976	0	0	0	0	0	0	0
Phages, Prophages, Transposable elements, Plasmids	Gene Transfer Agent (GTA)	Gene Transfer Agent	Gene Transfer Agent host specificity protein	0	0.000694324	0.365255	0.365255	0	0	0	0	0	0	0	0	0	0	0	0	0	0	0	0	0	0	0	0	0	0	0	0	0	0	0	0	0	0	0	0	0	0	0	0	0	0	0	0	0	0
Phages, Prophages, Transposable elements, Plasmids	Transposable elements	Conjugative transposon, Bacteroidales	Conjugative transposon protein TraI	0	0.000433981	0.365255	0.365255	0	0	0	0	0	0	0	0	0	0	0	0	0	0	0	0	0	0	0	0	0	0	0	0	0	0	0	0	0	0	0	0	0	0	0	0	0	0	0.0108495	0	0	0
Phages, Prophages, Transposable elements, Plasmids	Phages, Prophages	Phage tail fiber proteins	Phage long tail fiber proximal subunit	0	0.00128824	0.365255	0.365255	0	0	0	0	0	0	0	0	0	0	0	0	0	0	0	0	0	0	0	0	0	0	0	0	0	0.0322061	0	0	0	0	0	0	0	0	0	0	0	0	0	0	0	0
Phages, Prophages, Transposable elements, Plasmids	Transposable elements	Conjugative transposon, Bacteroidales	Conjugative transposon protein TraM	0	0.00128824	0.365255	0.365255	0	0	0	0	0	0	0	0	0	0	0	0	0	0	0	0	0	0	0	0	0	0	0	0	0	0.0322061	0	0	0	0	0	0	0	0	0	0	0	0	0	0	0	0
Phages, Prophages, Transposable elements, Plasmids	Phages, Prophages, Transposable elements, Plasmids	Integrons	Integron integrase IntIPac	0	0.000761035	0.365255	0.365255	0	0	0	0	0	0	0	0	0	0	0	0	0	0	0	0	0	0	0	0	0	0	0	0	0.0190259	0	0	0	0	0	0	0	0	0	0	0	0	0	0	0	0	0
Phages, Prophages, Transposable elements, Plasmids	Transposable elements	CBSS-203122.12.peg.188	Plasmid replication protein RepA - #1	0	0.00132538	0.365255	0.365255	0	0	0	0	0	0	0	0	0	0	0	0	0	0	0	0	0	0	0	0	0	0	0	0.0331345	0	0	0	0	0	0	0	0	0	0	0	0	0	0	0	0	0	0
Phages, Prophages, Transposable elements, Plasmids	Gene Transfer Agent (GTA)	Gene Transfer Agent	Gene Transfer Agent tail tape measure	0	0.00132538	0.365255	0.365255	0	0	0	0	0	0	0	0	0	0	0	0	0	0	0	0	0	0	0	0	0	0	0	0.0331345	0	0	0	0	0	0	0	0	0	0	0	0	0	0	0	0	0	0
Phages, Prophages, Transposable elements, Plasmids	Phages, Prophages	Listeria phi-A118-like prophages	Lactobacillus delbrueckii phage mv4 main capsid protein Gp34 homolog lin2390	0	0.00345125	0.365255	0.365255	0	0	0	0	0	0	0	0	0	0	0	0	0	0	0	0	0	0	0	0	0	0	0	0	0	0	0	0	0	0	0	0	0	0	0	0	0	0	0	0	0	0
Phages, Prophages, Transposable elements, Plasmids	Phages, Prophages	Listeria phi-A118-like prophages	Portal protein [Bacteriophage A118]	0	0.000433981	0.365255	0.365255	0	0	0	0	0	0	0	0	0	0	0	0	0	0	0	0	0	0	0	0	0	0	0	0	0	0	0	0	0	0	0	0	0	0	0	0	0	0	0.0108495	0	0	0
Phages, Prophages, Transposable elements, Plasmids	Phages, Prophages	r1t-like streptococcal phages	conserved hypothetical protein - phage associated	0.0766786	0.146977	0.377084	0.377084	0	0	0.0997009	0	0	0.0180115	0	0	0	0	0	0	0	0	0	0	1.49254	0	0	0	0	0.0531632	0.0335402	0.0331345	0.0190259	0.0644122	0.506073	0	0	0.0406009	0.0819001	0	0.452489	0	0.107904	0.21322	0.0312695	0	0.0433981	0.686106	0.197922	0
Phages, Prophages, Transposable elements, Plasmids	Phages, Prophages	r1t-like streptococcal phages	DNA replication protein DnaC - #1	0.0551592	0.0115583	0.381233	0.381233	0	0	0	0	0	0	0	0	0	0.0410256	0	0	0	0	0	0	0	0	1.11732	0	0	0	0	0	0	0	0	0	0	0.0203004	0	0	0	0	0	0	0	0	0.0108495	0.171527	0	0
Phages, Prophages, Transposable elements, Plasmids	Pathogenicity islands	Staphylococcal pathogenicity islands SaPI	Integrase, superantigen-encoding pathogenicity islands SaPI	0.000976801	0.0180995	0.391948	0.391948	0	0	0	0	0	0	0	0	0	0.0205128	0	0	0	0	0	0	0	0	0	0	0	0	0	0	0	0	0	0	0	0	0	0	0.452489	0	0	0	0	0	0	0	0	0
Phages, Prophages, Transposable elements, Plasmids	Phages, Prophages	r1t-like streptococcal phages	FIG020717: Phage-associated protein	0.0610501	0.0134821	0.40113	0.40113	0	0	0	0	0	0	0	0	0	0	0	0	0	0	0	0	0	0	0	1.28205	0	0	0	0.0331345	0	0.0322061	0	0	0	0	0.0819001	0.0551876	0	0.0742942	0	0	0	0	0.0108495	0	0.0494805	0
Phages, Prophages, Transposable elements, Plasmids	Phages, Prophages	Phage introns	Phage intron	0.0907943	0.150798	0.421402	0.421402	0	0	0	0	0	0	0	0	0.0235183	0	0	1.3245	0	0	0	0	0	0	0.558659	0	0	0.0531632	0.0335402	0	0.0380518	0	0	0	0	0.0609013	0.0819001	0.110375	0.452489	0.148588	0.13488	0.639659	0.0625391	0.547945	0.0433981	0.51458	0.197922	0.0563222
Phages, Prophages, Transposable elements, Plasmids	Transposable elements	Tn552	Tn552 transposase	0.00522364	0.00250156	0.448391	0.448391	0	0	0	0	0	0.0360231	0.0192049	0.0309502	0.0235183	0	0	0	0	0	0	0	0	0	0	0	0	0	0	0	0	0	0	0	0	0	0	0	0	0	0	0	0.0625391	0	0	0	0	0
Phages, Prophages, Transposable elements, Plasmids	Phages, Prophages	r1t-like streptococcal phages	FIG017897: Phage protein	0.0981293	0.050725	0.466209	0.466209	0	0	0	0	0	0	0	0	0	0	0	0	0	0	0	0	0	0	1.11732	0	0.943396	0	0	0.0331345	0	0	0	0.312826	0.097371	0.0203004	0	0.110375	0	0.0742942	0.053952	0.21322	0.0312695	0	0.021699	0	0.0989609	0.0281611
Phages, Prophages, Transposable elements, Plasmids	Phages, Prophages	Phage replication	DNA helicase, phage-associated	0.30082	0.448556	0.471699	0.471699	0	0.0956938	0	0	0	0.0360231	0.0384098	0.0928505	0.070555	0.0820513	0.0912409	0	0	0	0	0	1.49254	0	0	3.84615	0.471698	0.398724	0.218011	0.36448	0.342466	0.386473	1.31579	0.834202	0.389484	0.0812018	0.2457	0.220751	0.452489	0.222883	0.13488	1.0661	0.125078	2.19178	0.108495	0.51458	0.197922	0.0563222
Phages, Prophages, Transposable elements, Plasmids	Phages, Prophages	Listeria phi-A118-like prophages	Repressor (cro-like) [Bacteriophage A118]	0.00744331	0.0122911	0.477433	0.477433	0	0	0	0	0	0.0360231	0.0384098	0.0309502	0	0.0205128	0.0304136	0	0	0	0	0	0	0	0	0	0	0.0265816	0.0167701	0.0331345	0	0.0322061	0.101215	0	0.097371	0	0	0	0	0	0	0	0	0	0	0	0	0
Phages, Prophages, Transposable elements, Plasmids	Phages, Prophages	r1t-like streptococcal phages	Phage major capsid protein - #1	0.45096	0.611977	0.500324	0.500324	0	0	0.0997009	0	0	0.108069	0.0384098	0.0619003	0.14111	0.102564	0.152068	0.662252	0	0	1.05263	0.261438	4.47761	0	0.558659	1.28205	0.471698	0.239234	0.167701	0.298211	0.190259	0.354267	0.607287	0.729927	0.584226	0.182704	0.1638	0.386313	2.71493	0.297177	0.296736	0.852878	0.312695	1.64384	0.195291	1.20069	0.445324	0.25345
Phages, Prophages, Transposable elements, Plasmids	Phages, Prophages	Phage capsid proteins	Phage major capsid protein	0.45096	0.611977	0.500324	0.500324	0	0	0.0997009	0	0	0.108069	0.0384098	0.0619003	0.14111	0.102564	0.152068	0.662252	0	0	1.05263	0.261438	4.47761	0	0.558659	1.28205	0.471698	0.239234	0.167701	0.298211	0.190259	0.354267	0.607287	0.729927	0.584226	0.182704	0.1638	0.386313	2.71493	0.297177	0.296736	0.852878	0.312695	1.64384	0.195291	1.20069	0.445324	0.25345
Phages, Prophages, Transposable elements, Plasmids	Phages, Prophages	Phage packaging machinery	Phage DNA packaging	0.300211	0.209423	0.521508	0.521508	0	0	0	0	0	0	0	0	0	0	0	1.3245	0	0	0	0	0	0.0481464	2.23464	1.28205	1.41509	0.15949	0.10062	0.165673	0.0761035	0.0644122	0.506073	0.208551	0.584226	0.0406009	0.0819001	0.110375	0.452489	0.0742942	0.026976	0.21322	0.0312695	1.09589	0.151893	0.343053	0.0989609	0.0281611
Phages, Prophages, Transposable elements, Plasmids	Phages, Prophages	Phage entry and exit	Phage lysozyme	0.00661508	0.0101526	0.569369	0.569369	0	0	0	0	0	0.0540346	0	0.0309502	0.0235183	0	0.0304136	0	0	0	0	0	0	0	0	0	0	0.0265816	0	0.0662691	0.0380518	0	0.101215	0	0	0	0	0	0	0	0	0	0	0	0.021699	0	0	0
Phages, Prophages, Transposable elements, Plasmids	Phages, Prophages	r1t-like streptococcal phages	Phage protein	4.05043	3.28069	0.575893	0.575893	0	1.05263	0.398804	25	0	0.666427	0.537738	1.05231	1.01129	0.882051	1.06448	5.96026	0.475737	2.75229	11.5789	0.457516	13.4328	0.0481464	6.14525	6.41026	6.13208	3.00372	1.35838	2.65076	2.51142	2.38325	12.1457	3.85819	5.3554	0.791717	0.900901	1.26932	5.88235	2.00594	1.51066	4.26439	1.09443	8.21918	1.06325	4.45969	2.2761	0.506899
Phages, Prophages, Transposable elements, Plasmids	Phages, Prophages	Phage packaging machinery	Phage terminase, large subunit	0.757963	0.953368	0.587366	0.587366	0	0	0	0	0	0	0.115229	0.0928505	0.0940734	0.0410256	0.0608273	2.64901	0	0.917431	6.31579	0.0653595	2.98507	0.0481464	1.11732	0	1.41509	0.637959	0.419252	0.497018	0.475647	0.450886	2.93522	2.81543	1.94742	0.203004	0.2457	0.331126	1.80995	0.817236	0.512544	1.49254	0.281426	2.19178	0.292937	1.37221	0.494805	0.168966
Phages, Prophages, Transposable elements, Plasmids	Phages, Prophages	Phage introns	Phage-associated HNH homing endonuclease	0.0896744	0.128923	0.599911	0.599911	0	0	0	0	0	0	0	0	0	0	0	1.3245	0	0	0	0	0	0	0.558659	0	0	0.0531632	0.0167701	0	0.0190259	0	0	0	0	0.0203004	0.0819001	0.0551876	0.452489	0.0742942	0.080928	0.639659	0.0625391	0.547945	0.021699	0.51458	0.0989609	0.0563222
Phages, Prophages, Transposable elements, Plasmids	Phages, Prophages	r1t-like streptococcal phages	Phage-associated HNH homing endonuclease # Phage intron	0.0896744	0.128923	0.599911	0.599911	0	0	0	0	0	0	0	0	0	0	0	1.3245	0	0	0	0	0	0	0.558659	0	0	0.0531632	0.0167701	0	0.0190259	0	0	0	0	0.0203004	0.0819001	0.0551876	0.452489	0.0742942	0.080928	0.639659	0.0625391	0.547945	0.021699	0.51458	0.0989609	0.0563222
Phages, Prophages, Transposable elements, Plasmids	Phages, Prophages	Phage packaging machinery	Portal protein	0.0725215	0.109713	0.600899	0.600899	0	0	0	0	0	0	0	0	0	0	0.0304136	0	0	0	0	0	1.49254	0	0	0	0	0.212653	0.0670803	0.165673	0.114155	0.161031	0.404858	0.104275	0.389484	0.0203004	0	0	0	0.148588	0.053952	0	0	0	0.0650971	0.343053	0.0494805	0.0281611
Phages, Prophages, Transposable elements, Plasmids	Phages, Prophages	Phage tail proteins 2	Phage tape measure	0.0329585	0.0469731	0.624444	0.624444	0	0	0	0	0	0.0540346	0.0384098	0	0	0.0410256	0	0	0	0	0	0	0	0	0.558659	0	0	0.0265816	0.0335402	0	0.0190259	0.0322061	0.101215	0	0	0	0.0819001	0	0	0	0.026976	0	0.0625391	0.273973	0.021699	0	0.0494805	0.0281611
Phages, Prophages, Transposable elements, Plasmids	Phages, Prophages	r1t-like streptococcal phages	Deoxyuridine 5'-triphosphate nucleotidohydrolase (EC 3.6.1.23) - #2	0.00548587	0.00387447	0.627218	0.627218	0	0	0	0	0	0.0180115	0.0192049	0.0309502	0.0470367	0	0	0	0	0	0	0	0	0	0	0	0	0.0265816	0	0	0	0	0	0	0	0	0	0	0	0	0	0	0.0312695	0	0.0108495	0	0	0.0281611
Phages, Prophages, Transposable elements, Plasmids	Phages, Prophages	Phage neck proteins	Phage collar	0.0266028	0.0145077	0.637016	0.637016	0	0	0	0	0	0	0	0	0	0	0	0	0	0	0	0	0	0	0.558659	0	0	0.132908	0	0.0331345	0.0761035	0.0322061	0	0	0	0	0	0	0	0	0	0	0	0	0	0	0	0
Phages, Prophages, Transposable elements, Plasmids	Phages, Prophages	Phage tail fiber proteins	Phage tail fiber assembly protein	0.0142845	0.0106865	0.637231	0.637231	0	0	0	0	0	0.0360231	0.0192049	0.0928505	0.070555	0.0205128	0.0608273	0	0	0	0	0	0	0	0	0	0	0.0797448	0.0167701	0.0331345	0.0190259	0.0322061	0	0	0	0	0	0	0	0	0	0	0	0	0	0	0	0
Phages, Prophages, Transposable elements, Plasmids	Phages, Prophages	Listeria phi-A118-like prophages	Recombinational DNA repair protein RecT (prophage associated) - #1	0.014728	0.0109647	0.703067	0.703067	0	0.191388	0	0	0	0.0360231	0	0.0309502	0	0.0205128	0.0304136	0	0	0	0	0	0	0	0	0	0	0.0265816	0.0167701	0	0.0190259	0.0322061	0	0	0.097371	0	0	0.0551876	0	0	0.026976	0	0	0	0	0	0	0
Phages, Prophages, Transposable elements, Plasmids	Phages, Prophages	r1t-like streptococcal phages	Recombinational DNA repair protein RecT (prophage associated) - #3	0.014728	0.0109647	0.703067	0.703067	0	0.191388	0	0	0	0.0360231	0	0.0309502	0	0.0205128	0.0304136	0	0	0	0	0	0	0	0	0	0	0.0265816	0.0167701	0	0.0190259	0.0322061	0	0	0.097371	0	0	0.0551876	0	0	0.026976	0	0	0	0	0	0	0
Phages, Prophages, Transposable elements, Plasmids	Phages, Prophages	Phage replication	Recombinational DNA repair protein RecT (prophage associated) - #2	0.014728	0.0109647	0.703067	0.703067	0	0.191388	0	0	0	0.0360231	0	0.0309502	0	0.0205128	0.0304136	0	0	0	0	0	0	0	0	0	0	0.0265816	0.0167701	0	0.0190259	0.0322061	0	0	0.097371	0	0	0.0551876	0	0	0.026976	0	0	0	0	0	0	0
Phages, Prophages, Transposable elements, Plasmids	Phages, Prophages	Phage regulation of gene expression	RNA polymerase sigma factor	0.0439384	0.0381149	0.751398	0.751398	0	0.0956938	0.0997009	0	0	0.126081	0.0576147	0.0928505	0.117592	0.0820513	0.0608273	0	0.190295	0	0	0	0	0	0	0	0	0	0	0	0.0951294	0	0	0	0	0.0406009	0	0.0551876	0	0	0.053952	0	0.0625391	0.273973	0.0650971	0	0.0494805	0.0281611
Phages, Prophages, Transposable elements, Plasmids	Phages, Prophages	Prophage lysogenic conversion modules	Holin	0.0124418	0.0162233	0.779398	0.779398	0	0	0	0	0	0.0180115	0.0192049	0.0309502	0.0470367	0.0205128	0.0304136	0	0.0951475	0	0	0	0	0	0	0	0	0	0	0.0994036	0	0.0322061	0	0	0	0	0	0	0	0	0	0	0	0.273973	0	0	0	0
Phages, Prophages, Transposable elements, Plasmids	Phages, Prophages	Phage entry and exit	Phage portal	0.423152	0.469449	0.81293	0.81293	0	0	0	0	0	0.126081	0.172844	0.0928505	0.0235183	0.0615385	0.0912409	0	0	0	0	0.130719	1.49254	0.0962927	1.67598	2.5641	2.35849	0.239234	0.167701	0.165673	0.0951294	0.161031	0.404858	0.625652	0.486855	0.142103	0.3276	0.386313	0.904977	0.297177	0.188832	0.639659	0.281426	2.19178	0.184442	1.54374	0.494805	0.0844832
Phages, Prophages, Transposable elements, Plasmids	Phages, Prophages	Phage packaging machinery	Phage portal protein	0.422238	0.466358	0.821811	0.821811	0	0	0	0	0	0.126081	0.153639	0.0928505	0.0235183	0.0615385	0.0912409	0	0	0	0	0.130719	1.49254	0.0962927	1.67598	2.5641	2.35849	0.239234	0.167701	0.165673	0.0761035	0.161031	0.404858	0.625652	0.486855	0.142103	0.3276	0.386313	0.904977	0.297177	0.161856	0.639659	0.250156	2.19178	0.184442	1.54374	0.494805	0.0844832
Phages, Prophages, Transposable elements, Plasmids	Phages, Prophages	Phage packaging machinery	Phage terminase	1.48275	1.52005	0.944187	0.944187	0	0	0	0	0	0.0720461	0.192049	0.216651	0.14111	0.102564	0.212895	3.97351	0.285442	1.83486	8.42105	0.130719	4.47761	0.192585	2.7933	3.84615	4.24528	0.903775	0.620493	0.662691	0.932268	0.869565	3.84615	3.64964	2.72639	0.324807	0.4914	0.551876	3.16742	1.3373	0.701376	2.55864	0.437774	4.10959	0.45568	2.40137	0.940129	0.281611
Phages, Prophages, Transposable elements, Plasmids	Phages, Prophages	Phage packaging machinery	Phage terminase large subunit	0.334518	0.339928	0.970355	0.970355	0	0	0	0	0	0.0720461	0.0576147	0.123801	0.0235183	0.0410256	0.152068	1.3245	0.0951475	0	0	0	1.49254	0.0481464	0.558659	2.5641	0.471698	0.186071	0.150931	0.0994036	0.304414	0.354267	0.910931	0.417101	0.584226	0.101502	0	0.165563	0.904977	0.371471	0.13488	0.426439	0.125078	0.547945	0.108495	0.686106	0.296883	0.0563222
Phages, Prophages, Transposable elements, Plasmids	Phages, Prophages	Phage neck proteins	Phage neck	0.00111992	0.00106326	0.97099	0.97099	0	0	0	0	0	0	0	0	0.0235183	0	0	0	0	0	0	0	0	0	0	0	0	0.0265816	0	0	0	0	0	0	0	0	0	0	0	0	0	0	0	0	0	0	0	0
Phages, Prophages, Transposable elements, Plasmids	Phages, Prophages	Phage neck proteins	Phage neck whiskers	0.00111992	0.00106326	0.97099	0.97099	0	0	0	0	0	0	0	0	0.0235183	0	0	0	0	0	0	0	0	0	0	0	0	0.0265816	0	0	0	0	0	0	0	0	0	0	0	0	0	0	0	0	0	0	0	0
Virulence, Disease and Defense	Resistance to antibiotics and toxic compounds	Cobalt-zinc-cadmium resistance	Transcriptional regulator, MerR family	0.0100152	0.127299	1.72384e-05	1.72384e-05	0	0	0	0	0	0.0360231	0	0.0619003	0.0470367	0	0	0	0	0	0	0.0653595	0	0	0	0	0	0.0531632	0.0670803	0.0662691	0.0380518	0	0.202429	0	0	0.121803	0.2457	0.165563	0.452489	0.222883	0.161856	0	0.187617	0.273973	0.0759466	0.171527	0.247402	0.140805
Virulence, Disease and Defense	Resistance to antibiotics and toxic compounds	Copper homeostasis	Multicopper oxidase	0.00999121	0.0739945	0.000235553	0.000235553	0	0	0	0	0	0	0	0.0309502	0	0	0	0	0	0	0	0.130719	0	0.0481464	0	0	0	0.132908	0.10062	0	0.0951294	0.128824	0	0	0.097371	0.101502	0	0.0551876	0	0.148588	0.188832	0.21322	0.0312695	0	0.0867961	0	0	0
Virulence, Disease and Defense	Resistance to antibiotics and toxic compounds	Copper homeostasis	Copper chaperone	0	0.0352628	0.000434129	0.000434129	0	0	0	0	0	0	0	0	0	0	0	0	0	0	0	0	0	0	0	0	0	0.0531632	0	0.0331345	0.0380518	0.0322061	0	0.104275	0	0.0203004	0	0.165563	0	0.0742942	0.053952	0	0.0625391	0	0.0108495	0	0.0494805	0
Virulence, Disease and Defense	Resistance to antibiotics and toxic compounds	Cobalt-zinc-cadmium resistance	Probable Co/Zn/Cd efflux system membrane fusion protein	0.00144827	0.0513569	0.000743264	0.000743264	0	0	0	0	0	0	0	0	0	0	0.0304136	0	0	0	0	0	0	0	0	0	0	0	0.0167701	0	0.0190259	0	0	0	0	0.142103	0.0819001	0.110375	0	0.0742942	0.107904	0.21322	0.0312695	0	0.0542476	0	0.0494805	0
Virulence, Disease and Defense	Resistance to antibiotics and toxic compounds	Methicillin resistance in Staphylococci	UDP-N-acetylmuramoylalanyl-D-glutamate--2,6-diaminopimelate ligase (EC 6.3.2.13) - #2	0.015422	0.0899415	0.000919211	0.000919211	0	0	0	0	0	0.0360231	0	0	0	0	0.0608273	0	0	0	0	0.130719	0	0.0962927	0	0	0	0.0797448	0.0670803	0.132538	0.0761035	0.0966184	0.101215	0.104275	0.097371	0.0609013	0.1638	0.0551876	0.452489	0.148588	0.026976	0	0	0	0.0759466	0	0.0494805	0.0844832
Virulence, Disease and Defense	Resistance to antibiotics and toxic compounds	Resistance to chromium compounds	Chromate transport protein ChrA	0	0.0417387	0.00141257	0.00141257	0	0	0	0	0	0	0	0	0	0	0	0	0	0	0	0	0	0	0	0	0	0.0265816	0.0335402	0	0.0190259	0	0	0	0	0.0609013	0.0819001	0.0551876	0	0	0.053952	0.21322	0.0312695	0	0.0325486	0.171527	0.0989609	0
Virulence, Disease and Defense	Virulence, Disease and Defense	C jejuni colonization of chick caeca	Chemotaxis regulator - transmits chemoreceptor signals to flagelllar motor components CheY - #3	0.000857692	0.0193183	0.00324729	0.00324729	0	0	0	0	0	0.0180115	0	0	0	0	0	0	0	0	0	0	0	0	0	0	0	0.0265816	0	0.0331345	0.0190259	0	0	0	0.097371	0.0203004	0	0.0551876	0	0	0.026976	0	0.0312695	0	0.0108495	0	0.0494805	0
Virulence, Disease and Defense	Resistance to antibiotics and toxic compounds	Cobalt-zinc-cadmium resistance	Cobalt-zinc-cadmium resistance protein CzcA	0.0460432	0.213622	0.00346788	0.00346788	0	0	0	0	0	0.0180115	0	0.0309502	0	0.0615385	0	0	0	0	0	0.326797	0	0.52961	0	0	0	0	0.218011	0.231942	0.190259	0.0966184	0	0	0	0.44661	0.2457	0.496689	0	0.668648	0.296736	0.426439	0.125078	0	0.249539	0	0.494805	0
Virulence, Disease and Defense	Resistance to antibiotics and toxic compounds	Cobalt-zinc-cadmium resistance	Cation efflux system protein CusA	0.0460432	0.213622	0.00346788	0.00346788	0	0	0	0	0	0.0180115	0	0.0309502	0	0.0615385	0	0	0	0	0	0.326797	0	0.52961	0	0	0	0	0.218011	0.231942	0.190259	0.0966184	0	0	0	0.44661	0.2457	0.496689	0	0.668648	0.296736	0.426439	0.125078	0	0.249539	0	0.494805	0
Virulence, Disease and Defense	Resistance to antibiotics and toxic compounds	Cobalt-zinc-cadmium resistance	Heavy metal RND efflux outer membrane protein, CzcC family	0	0.0345577	0.00385842	0.00385842	0	0	0	0	0	0	0	0	0	0	0	0	0	0	0	0	0	0	0	0	0	0	0.0335402	0	0.0380518	0	0	0	0	0.0812018	0.0819001	0.0551876	0	0	0.107904	0	0	0	0.0542476	0	0.148441	0
Virulence, Disease and Defense	Resistance to antibiotics and toxic compounds	BlaR1 Family Regulatory Sensor-transducer Disambiguation	Peptidase M48, Ste24p precursor	0	0.0183005	0.00431461	0.00431461	0	0	0	0	0	0	0	0	0	0	0	0	0	0	0	0	0	0	0	0	0	0	0.0167701	0.0331345	0.0190259	0.0322061	0	0	0	0.0203004	0	0	0	0	0.026976	0	0	0	0.021699	0	0	0
Virulence, Disease and Defense	Invasion and intracellular resistance	Gram-Positive Extracellular Nucleases	DNA-entry nuclease (Competence-specific nuclease) (EC 3.1.30.-) - #1	0.0288145	0.00211874	0.00432374	0.00432374	0	0.0956938	0.0997009	0	0	0.0360231	0.0384098	0.0619003	0.14111	0.0410256	0.0912409	0	0	0	0	0	0	0	0	0	0	0	0	0	0	0	0	0	0	0	0	0	0	0	0	0	0.0312695	0	0.021699	0	0	0
Virulence, Disease and Defense	Adhesion	Adhesion of Campylobacter	Fibronectin/fibrinogen-binding protein	0.0262135	0.000433981	0.00478237	0.00478237	0	0.0956938	0.0997009	0	0	0.0720461	0.0192049	0.0619003	0.14111	0	0.0608273	0	0	0	0	0	0	0	0	0	0	0	0	0	0	0	0	0	0	0	0	0	0	0	0	0	0	0	0.0108495	0	0	0
Virulence, Disease and Defense	Virulence, Disease and Defense	Streptococcus pyogenes Virulome	CAMP factor	0	0.0540906	0.00732599	0.00732599	0	0	0	0	0	0	0	0	0	0	0	0	0	0	0	0	0	0	0	0	0	0.106326	0.0167701	0.132538	0.0951294	0.193237	0	0	0.389484	0	0.0819001	0	0	0	0	0	0	0	0	0	0.0494805	0
Virulence, Disease and Defense	Resistance to antibiotics and toxic compounds	Streptococcus pneumoniae Vancomycin Tolerance Locus	Sensor histidine kinase VncS	0.0189298	0	0.00787438	0.00787438	0	0.0956938	0.0997009	0	0	0.0180115	0.0384098	0.0309502	0.0235183	0	0.0912409	0	0	0	0	0	0	0	0	0	0	0	0	0	0	0	0	0	0	0	0	0	0	0	0	0	0	0	0	0	0	0
Virulence, Disease and Defense	Adhesion	Streptococcus pyogenes recombinatorial zone	Chaperonin (heat shock protein 33)	0.0170882	0	0.00941557	0.00941557	0	0	0.0997009	0	0	0.0360231	0.0576147	0	0.0940734	0.0410256	0.0304136	0	0	0	0	0	0	0	0	0	0	0	0	0	0	0	0	0	0	0	0	0	0	0	0	0	0	0	0	0	0	0
Virulence, Disease and Defense	Resistance to antibiotics and toxic compounds	MexE-MexF-OprN Multidrug Efflux System	Multidrug efflux transporter MexF	0.00456062	0.0283362	0.0110184	0.0110184	0	0	0	0	0	0	0	0	0	0	0.0304136	0	0	0	0	0.0653595	0	0	0	0	0	0	0.0167701	0	0.0380518	0	0	0	0	0.0609013	0.0819001	0.0551876	0	0.148588	0.080928	0	0.0312695	0	0.0325486	0	0.0494805	0
Virulence, Disease and Defense	Resistance to antibiotics and toxic compounds	Streptococcus pneumoniae Vancomycin Tolerance Locus	ABC transporter, ATP-binding protein Vex2	0.00672874	0	0.0116961	0.0116961	0	0	0	0	0	0.0180115	0.0384098	0.0309502	0.0235183	0	0.0304136	0	0	0	0	0	0	0	0	0	0	0	0	0	0	0	0	0	0	0	0	0	0	0	0	0	0	0	0	0	0	0
Virulence, Disease and Defense	Resistance to antibiotics and toxic compounds	Copper homeostasis	Copper tolerance protein	0.00229268	0.0241907	0.0138818	0.0138818	0	0	0	0	0	0	0	0	0	0	0	0	0	0	0	0	0	0.0481464	0	0	0	0	0.0335402	0	0.0570776	0	0	0	0	0.0406009	0.1638	0.0551876	0	0.0742942	0.053952	0	0.0312695	0	0.0108495	0	0.0494805	0
Virulence, Disease and Defense	Virulence, Disease and Defense	C jejuni colonization of chick caeca	Predicted signal transduction protein - #1	0	0.0133094	0.0146818	0.0146818	0	0	0	0	0	0	0	0	0	0	0	0	0	0	0	0	0	0	0	0	0	0	0	0	0.0380518	0	0	0	0	0.0203004	0.0819001	0.0551876	0	0	0.053952	0	0.0312695	0	0	0	0	0
[truncated: 5,171 more rows]
[truncated: 4 more columns]
